# Supplementary material for: Luminescent Behavior of Zn(II) and Mn(II) Halide Derivatives of 4-Phenyldinaphtho[2,1-d:1′,2′-f][1,3,2]dioxaphosphepine 4-Oxide and Single-Crystal X-ray Structure Determination of the Ligand
Source: MDPI journal article supplement (doi:10.3390/molecules29010239), 2024-01-01
Supplement: s1 [file s1]

# Luminescent Behaviour of Zn(II) and Mn(II) Halide Derivatives of 4-Phenyldinaphtho[2,1-d:1',2'-f][1,3,2]dioxaphosphepine 4-Oxide and Single-Crystal X-ray Structure Determination of the Ligand

Valentina Ferraro <sup>1</sup>, Jesús Castro <sup>2</sup>, Marco Bortoluzzi <sup>1,\*</sup>

<sup>1</sup> Dipartimento di Scienze Molecolari e Nanosistemi, Università Ca' Foscari Venezia, 30172 Mestre VE, Italy; valentina.ferraro@unive.it

<sup>2</sup> Departamento de Química Inorgánica, Facultade de Química, Edificio de Ciencias Experimentais, Universidade de Vigo, 36310 Vigo Galicia, Spain; jesusc@uvigo.gal

\* Correspondence: markos@unive.it; Tel.: +39-0412348651

## Supplementary Material

|                                                                                                                                                                                                                                                  |               |
|--------------------------------------------------------------------------------------------------------------------------------------------------------------------------------------------------------------------------------------------------|---------------|
| Selected NMR spectra of O=PPh(BINOL)                                                                                                                                                                                                             | Figures S1-S4 |
| Crystal data and structure refinement for (S)-O=PPh(BINOL)                                                                                                                                                                                       | Table S1      |
| Selected NMR spectra of [Zn{O=PPh(BINOL)} <sub>2</sub> ]                                                                                                                                                                                         | Figures S5-S6 |
| IR spectra of (S)-O=PPh(BINOL) and (S,S)-[ZnBr <sub>2</sub> {O=PPh(BINOL)} <sub>2</sub> ]                                                                                                                                                        | Figure S7     |
| TGA curves of the [MX <sub>2</sub> {O=PPh(BINOL)} <sub>2</sub> ] complexes                                                                                                                                                                       | Figure S8     |
| PL spectrum of [Zn{O=PPh(BINOL)} <sub>2</sub> ] in CH <sub>2</sub> Cl <sub>2</sub>                                                                                                                                                               | Figure S9     |
| IR spectra of (S,S)-[MnCl <sub>2</sub> {O=PPh(BINOL)} <sub>2</sub> ] and (S,S)-[MnBr <sub>2</sub> {O=PPh(BINOL)} <sub>2</sub> ]                                                                                                                  | Figure S10    |
| PL spectra of O=PPh(BINOL)                                                                                                                                                                                                                       | Figure S11    |
| DFT optimized geometries of [ZnBr <sub>2</sub> {O=PPh(BINOL)} <sub>2</sub> ] (singlet and triplet states) and of [MnBr <sub>2</sub> {O=PPh(BINOL)} <sub>2</sub> ] (sextet and octet states) with Gibbs energy differences and selected surfaces. | Figure S12    |
| DFT optimized geometries of [MnBr <sub>2</sub> {O=PPh(BINOL)} <sub>2</sub> ] and [MnBr <sub>2</sub> {O=PPh(BINOL)} <sub>2</sub> ] <sub>2</sub> with Gibbs energy difference                                                                      | Figure S13    |
| Cartesian coordinates of the DFT-optimized structures                                                                                                                                                                                            | Table S2      |

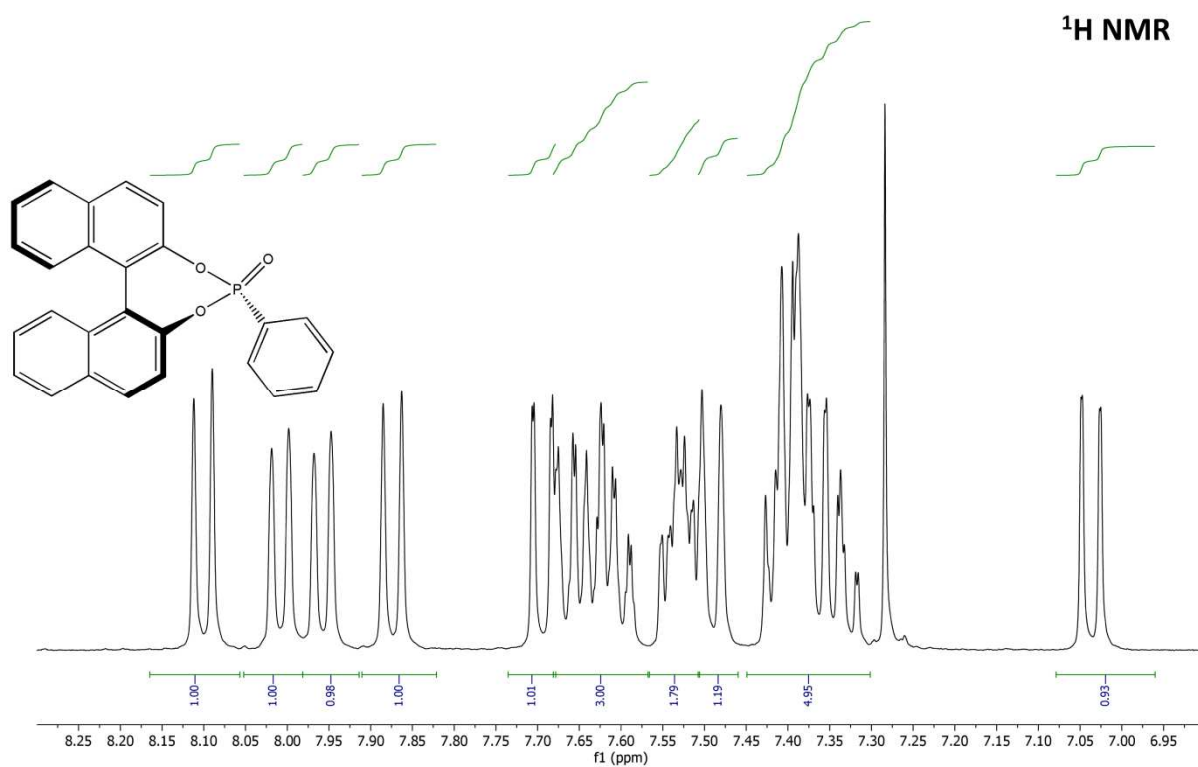

**Figure S1.**  $^1\text{H}$  NMR spectrum of  $(S)\text{-O=PPh(BINOL)}$  ( $\text{CDCl}_3$ , 300 K).

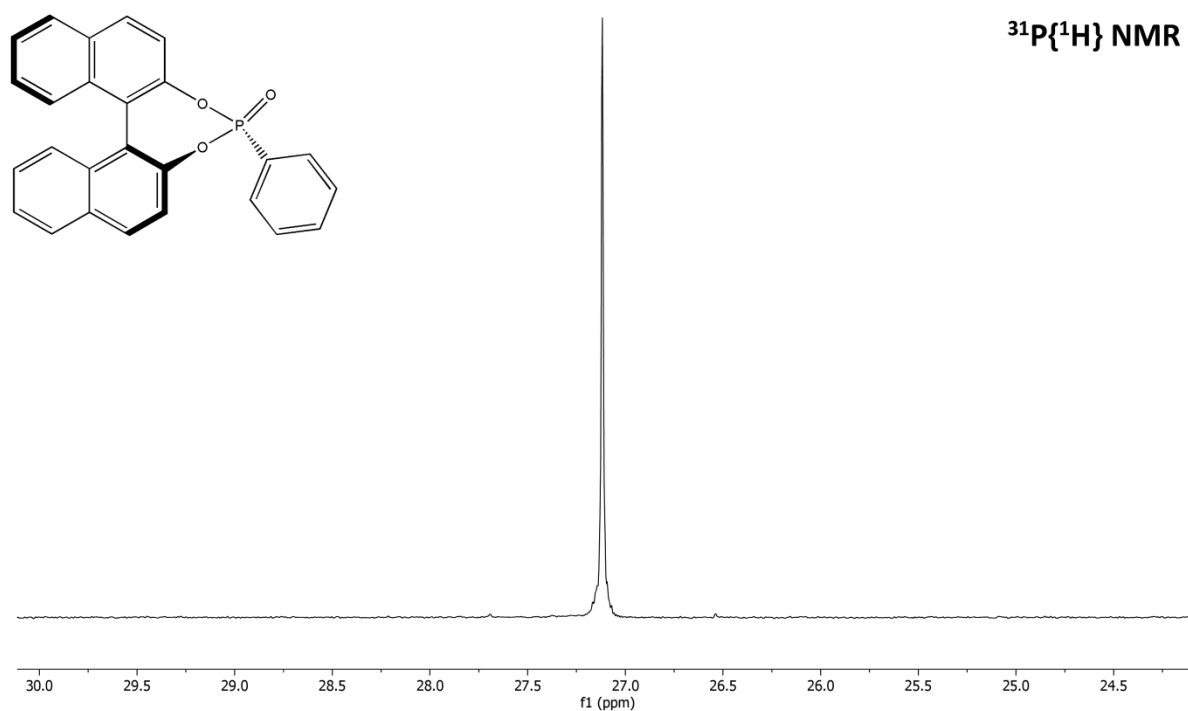

**Figure S2.**  $^{31}\text{P}\{^1\text{H}\}$  NMR spectrum of  $(S)\text{-O=PPh(BINOL)}$  ( $\text{CDCl}_3$ , 300 K).

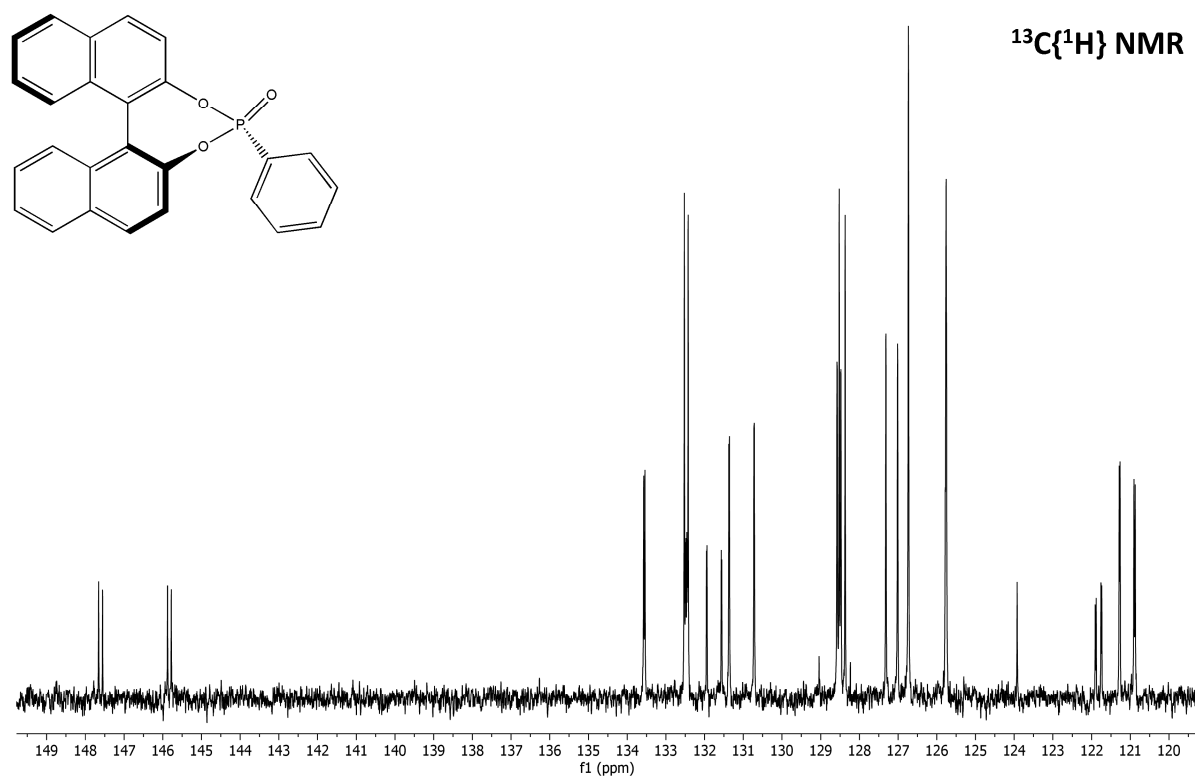

**Figure S3.**  $^{13}\text{C}\{^1\text{H}\}$  NMR spectrum of (*S*)-O=PPh(BINOL) ( $\text{CDCl}_3$ , 300 K).

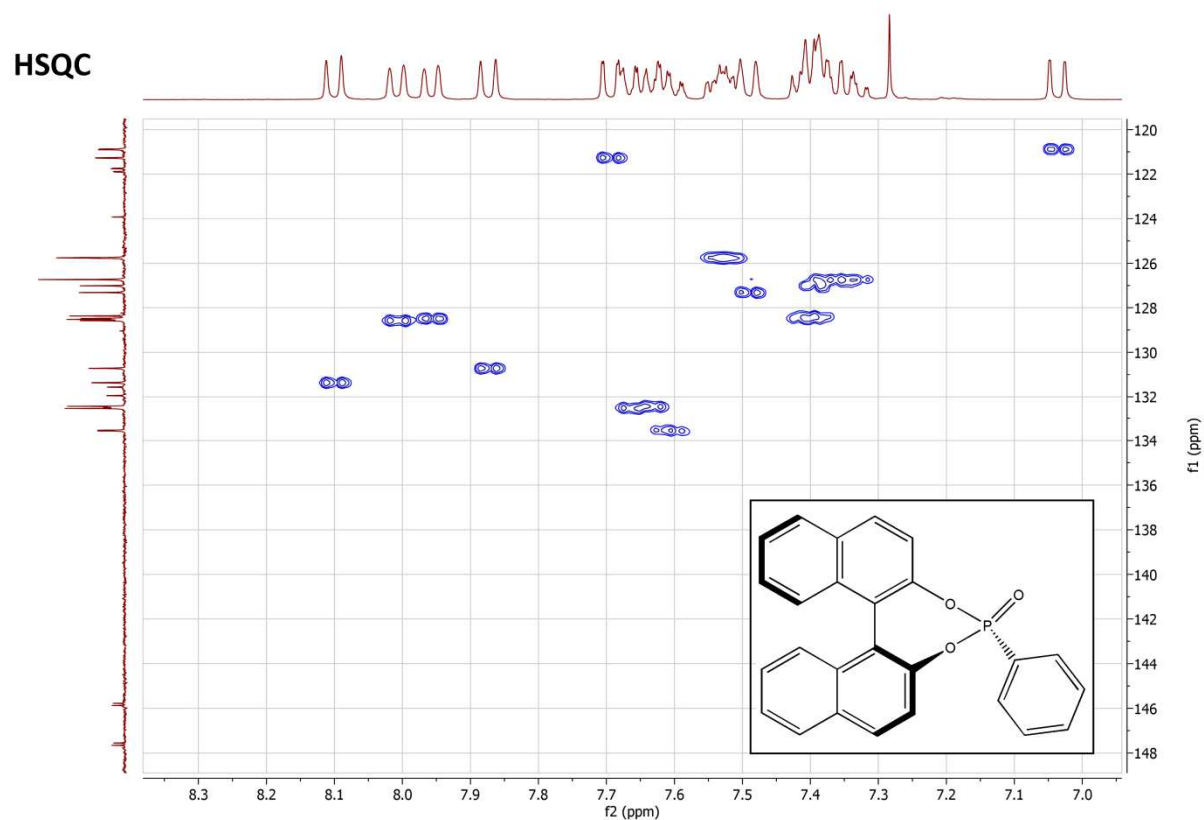

**Figure S4.**  $^1\text{H}$ - $^{13}\text{C}$  HSQC NMR spectrum of (*S*)-O=PPh(BINOL) ( $\text{CDCl}_3$ , 300 K).

**Table S1.** Crystal data and structure refinement for (S)-O=PPh(BINOL).

|                                                     |                                                                               |
|-----------------------------------------------------|-------------------------------------------------------------------------------|
| Empirical formula                                   | C <sub>26</sub> H <sub>17</sub> O <sub>3</sub> P                              |
| Formula weight                                      | 408.36                                                                        |
| Temperature                                         | 100(2) K                                                                      |
| Wavelength                                          | 0.71073 Å                                                                     |
| Crystal system                                      | Orthorhombic                                                                  |
| Space group                                         | <i>P</i> 2 <sub>1</sub> 2 <sub>1</sub> 2 <sub>1</sub>                         |
| Unit cell dimensions                                | <i>a</i> = 10.1725(3) Å<br><i>b</i> = 10.5825(3) Å<br><i>c</i> = 18.4246(5) Å |
| Volume                                              | 1983.42(10) Å <sup>3</sup>                                                    |
| <i>Z</i>                                            | 4                                                                             |
| Density (calculated)                                | 1.368 Mg/m <sup>3</sup>                                                       |
| Absorption coefficient                              | 0.165 mm <sup>-1</sup>                                                        |
| <i>F</i> (000)                                      | 848                                                                           |
| Crystal size                                        | 0.208 x 0.177 x 0.148 mm                                                      |
| Theta range for data collection                     | 2.211 to 28.315°                                                              |
| Index ranges                                        | -13 ≤ <i>h</i> ≤ 13<br>-14 ≤ <i>k</i> ≤ 14<br>-24 ≤ <i>l</i> ≤ 24             |
| Reflections collected                               | 31587                                                                         |
| Independent reflections                             | 4932 [ <i>R</i> <sub>int</sub> = 0.0204]                                      |
| Reflections observed (>2σ)                          | 4866                                                                          |
| Data Completeness                                   | 0.999                                                                         |
| Absorption correction                               | Semi-empirical from equivalents                                               |
| Max. and min. transmission                          | 0.7457 and 0.6981                                                             |
| Refinement method                                   | Full-matrix least-squares on <i>F</i> <sup>2</sup>                            |
| Data / restraints / parameters                      | 4932 / 0 / 271                                                                |
| Goodness-of-fit on <i>F</i> <sup>2</sup>            | 1.091                                                                         |
| Final <i>R</i> indices [ <i>I</i> > 2σ( <i>I</i> )] | <i>R</i> <sub>1</sub> = 0.0273<br><i>wR</i> <sub>2</sub> = 0.0731             |
| <i>R</i> indices (all data)                         | <i>R</i> <sub>1</sub> = 0.0277<br><i>wR</i> <sub>2</sub> = 0.0734             |
| Absolute structure parameter                        | -0.004(14)                                                                    |
| Largest diff. peak and hole                         | 0.348 and -0.311 e.Å <sup>-3</sup>                                            |

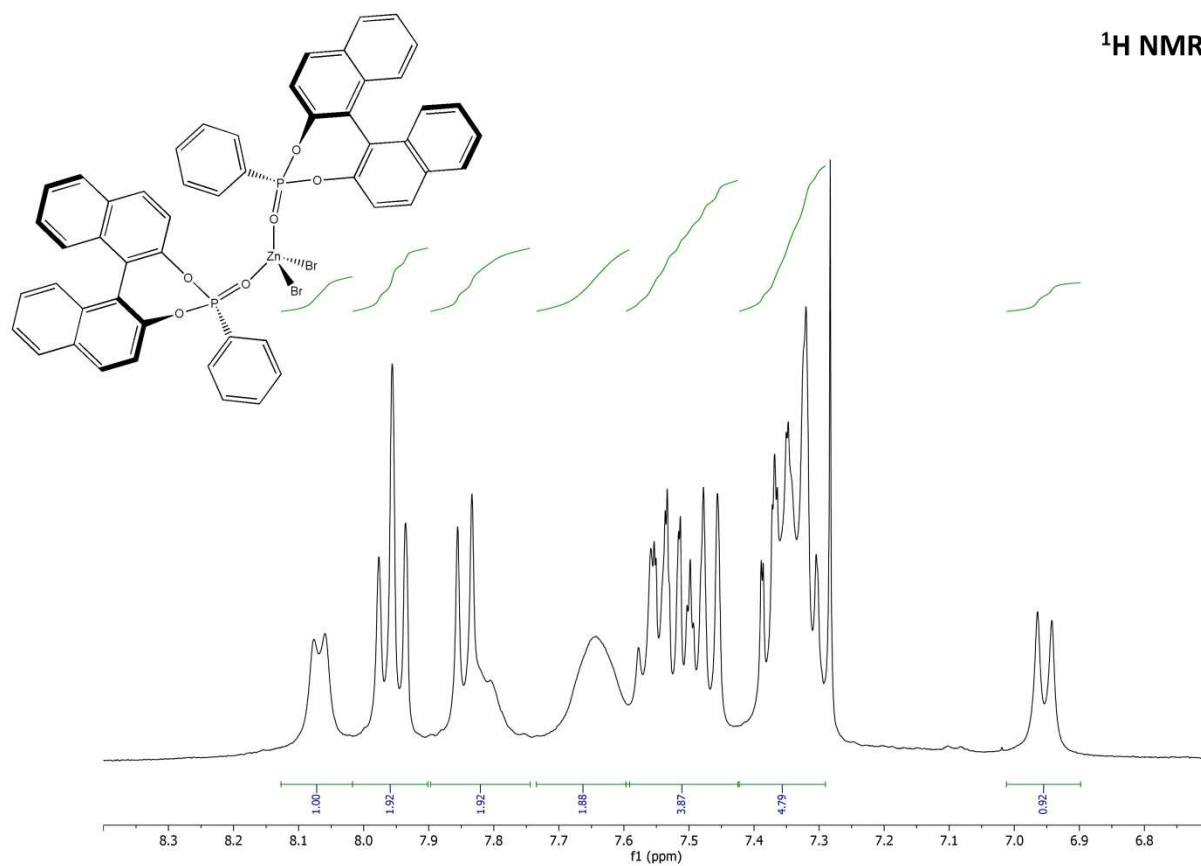

**Figure S5.**  $^1\text{H}$  NMR spectrum of  $(S,S)\text{-[ZnBr}_2\{\text{O=PPh(BINOL)}\}_2]$  (CDCl<sub>3</sub>, 300 K).

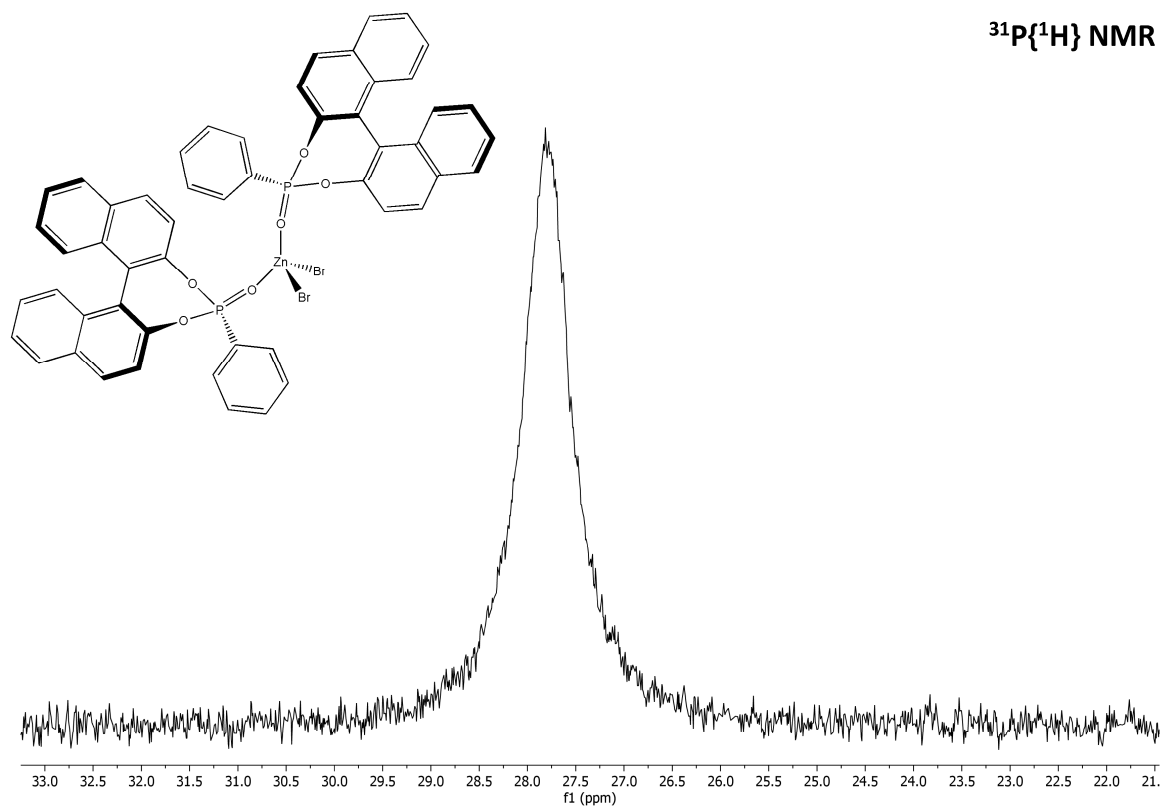

**Figure S6.**  $^{31}\text{P}\{^1\text{H}\}$  NMR spectrum of  $(S,S)\text{-[ZnBr}_2\{\text{O=PPh(BINOL)}\}_2]$  (CDCl<sub>3</sub>, 300 K).

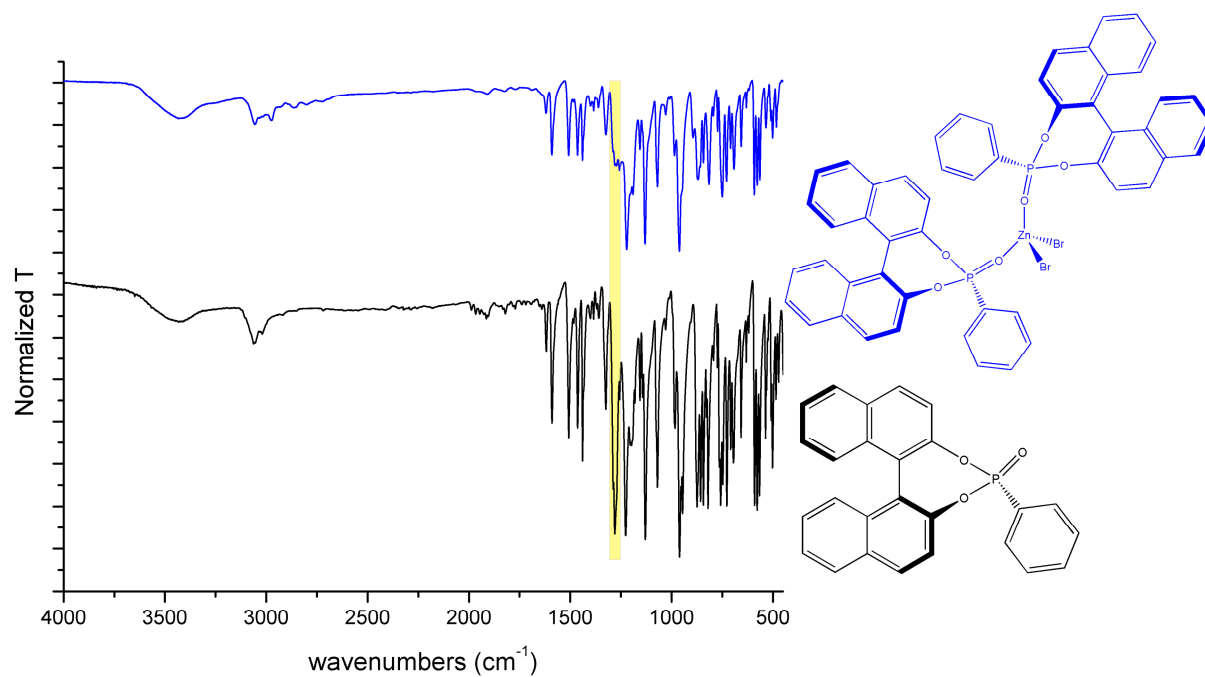

**Figure S7.** IR spectra (KBr) of (S)-O=PPh(BINOL) and (S,S)-[ZnBr<sub>2</sub>{O=PPh(BINOL)}<sub>2</sub>].

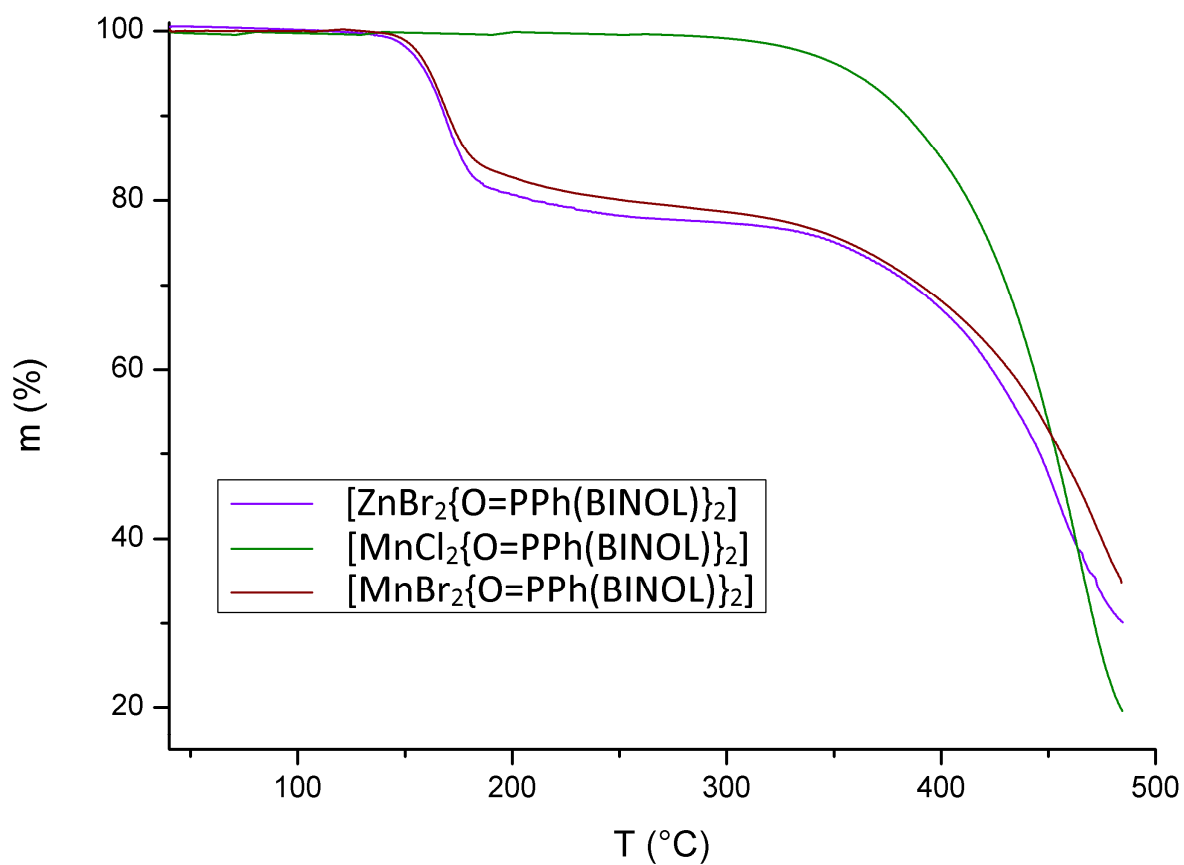

**Figure S8.** TGA curves of the [MX<sub>2</sub>{O=PPh(BINOL)}<sub>2</sub>] complexes (M = Zn, X = Br; M = Mn, X = Cl, Br), S,S-enantiomers.

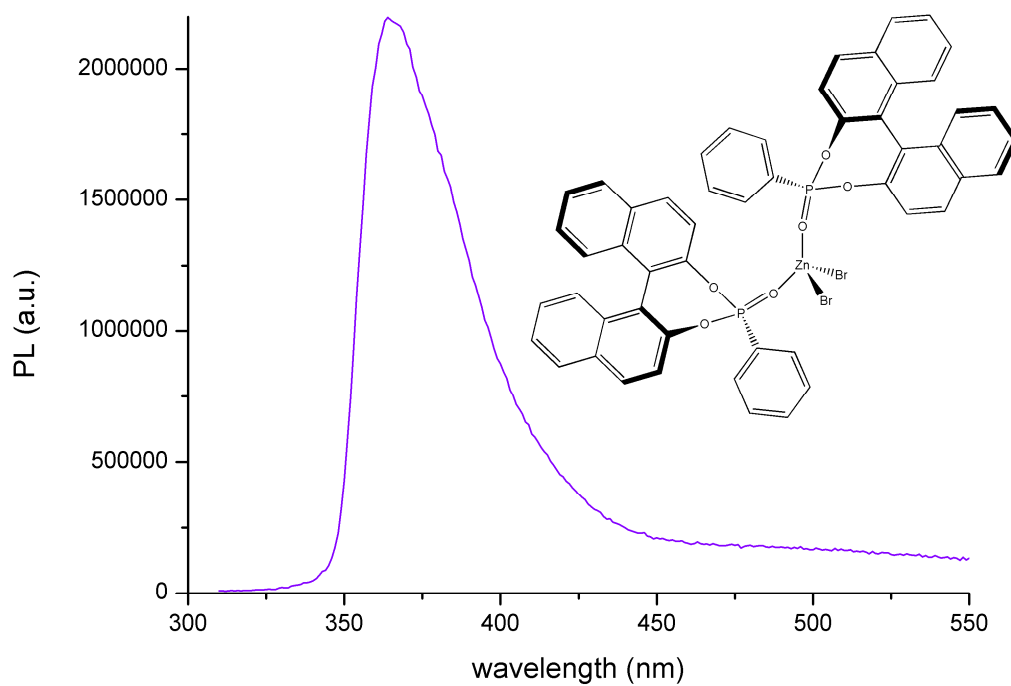

**Figure S9.** PL spectrum ( $\lambda_{\text{excitation}} = 280 \text{ nm}$ , r.t.) of  $(S,S)\text{-[ZnBr}_2\{\text{O=PPh(BINOL)}\}_2]$ ,  $6 \cdot 10^{-3} \text{ M}$  in  $\text{CH}_2\text{Cl}_2$ .

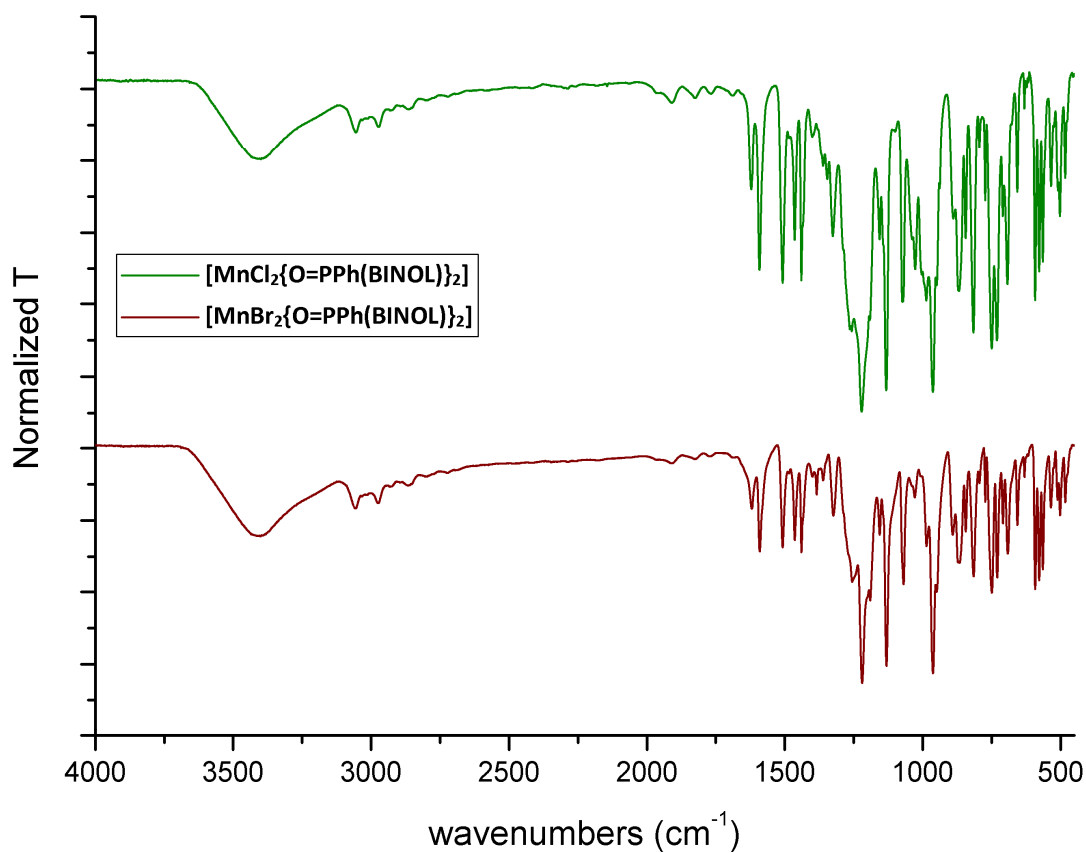

**Figure S10.** IR spectra (KBr) of  $(S,S)\text{-[MnCl}_2\{\text{O=PPh(BINOL)}\}_2]$  and  $(S,S)\text{-[MnBr}_2\{\text{O=PPh(BINOL)}\}_2]$ .

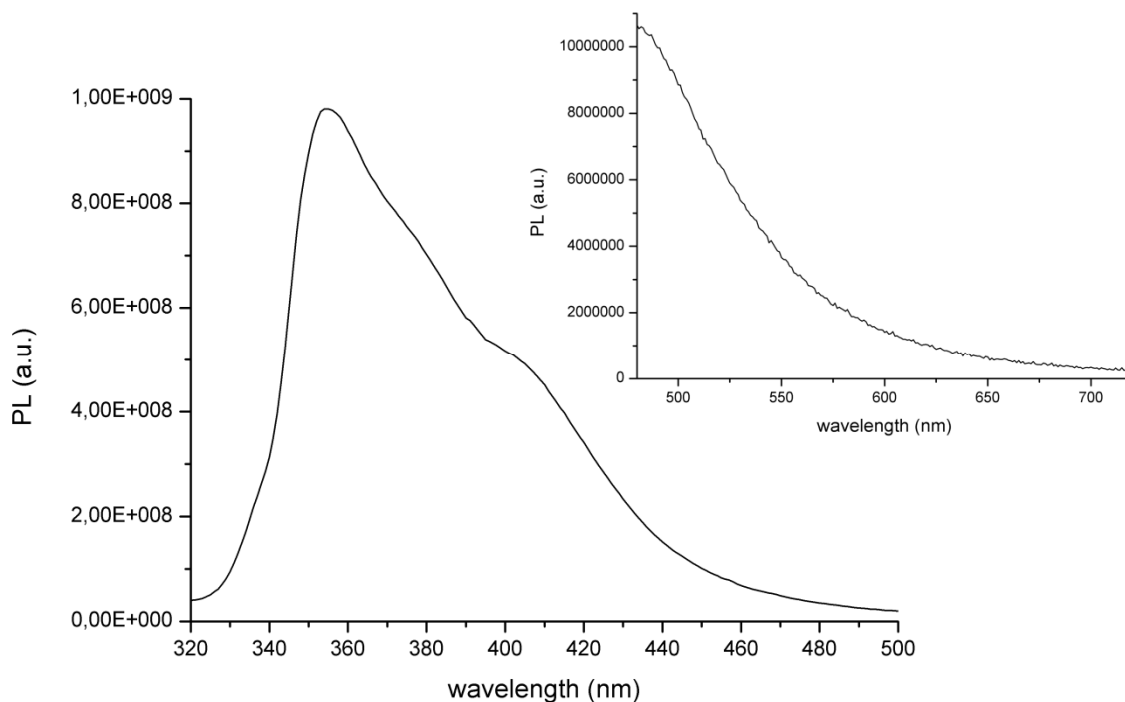

**Figure S11.** PL spectra (r.t.) of solid O=PPh(BINOL).

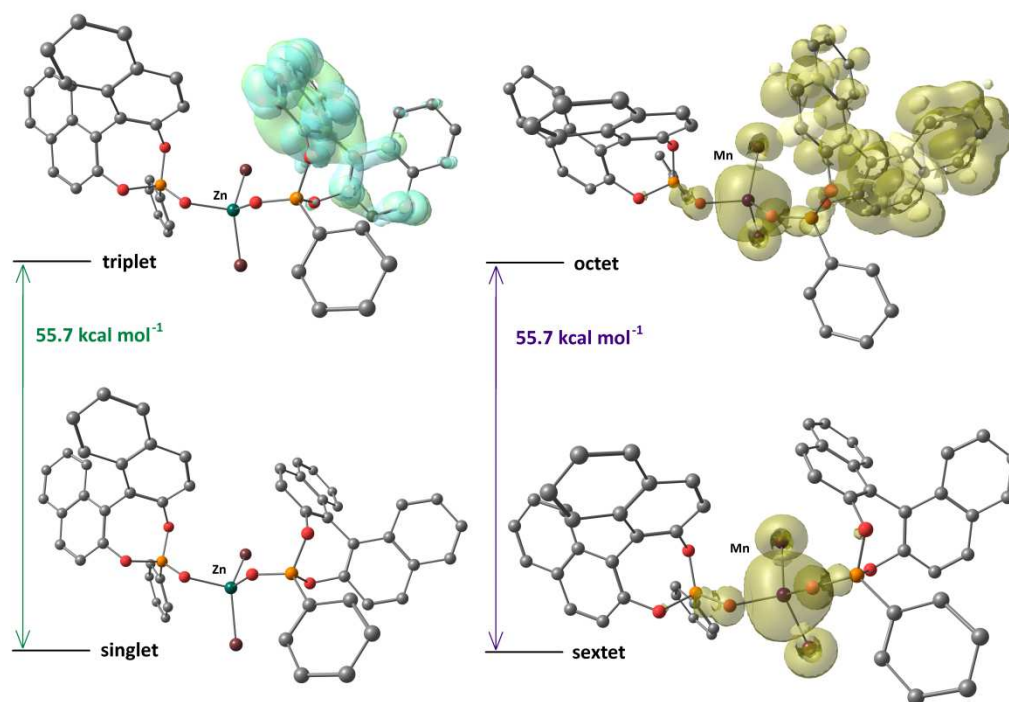

**Figure S12.** DFT optimized (C-PCM/ $r^2$ SCAN-3c) geometries of  $[\text{ZnBr}_2\{\text{O=PPh(BINOL)}\}_2]$  (singlet and triplet states) and of  $[\text{MnBr}_2\{\text{O=PPh(BINOL)}\}_2]$  (sextet and octet states) with Gibbs energy differences. Colour map: Zn, green; Mn, violet; Br, dark red; O, red; P, orange; C, grey. Hydrogen atoms are omitted for clarity. Hole (light blue) and electron (green) distributions for the  $[\text{ZnBr}_2\{\text{O=PPh(BINOL)}\}_2]$   $T_1 \leftarrow S_0$  transition. Phosphorescence is the reverse process. Spin density surfaces (yellow tones) of  $[\text{MnBr}_2\{\text{O=PPh(BINOL)}\}_2]$ . Surfaces isovalue = 0.001 a.u.



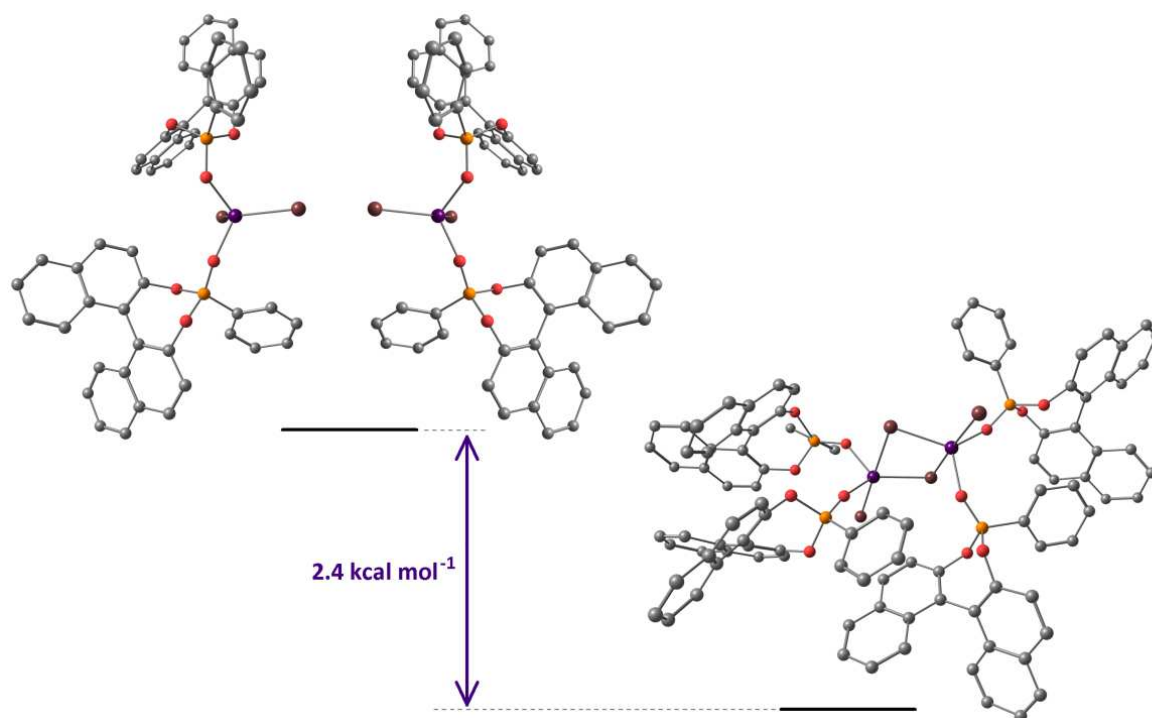

**Figure S13.** DFT optimized (C-PCM/ $r^2$ SCAN-3c) geometries of  $[\text{MnBr}_2\{\text{O=PPh}(\text{BINOL})\}_2]$  (sextet state) and  $[\text{MnBr}_2\{\text{O=PPh}(\text{BINOL})\}_2]_2$  (undecet state) with Gibbs energy difference. Colour map: Mn, violet; Br, dark red; O, red; P, orange; C, grey. Hydrogen atoms are omitted for clarity.

**Table S2.** Cartesian coordinates of the DFT-optimized structures.

| <b>[ZnBr<sub>2</sub>{O=PPh(BINOL)}<sub>2</sub>] (singlet state, r<sup>2</sup>SCAN-3c)</b> |               |              |              | <b>[ZnBr<sub>2</sub>{O=PPh(BINOL)}<sub>2</sub>] (triplet state, r<sup>2</sup>SCAN-3c)</b> |               |              |              |
|-------------------------------------------------------------------------------------------|---------------|--------------|--------------|-------------------------------------------------------------------------------------------|---------------|--------------|--------------|
| H                                                                                         | -4.856730000  | -0.073988000 | 5.281349000  | H                                                                                         | -4.959528000  | -0.230136000 | 5.422785000  |
| C                                                                                         | -3.812513000  | 0.196178000  | 5.160556000  | C                                                                                         | -3.926985000  | 0.046459000  | 5.234989000  |
| H                                                                                         | -4.104354000  | 2.307371000  | 5.309819000  | H                                                                                         | -4.223951000  | 2.183417000  | 5.548590000  |
| C                                                                                         | -3.389734000  | 1.500151000  | 5.170674000  | C                                                                                         | -3.502454000  | 1.406407000  | 5.316279000  |
| C                                                                                         | -1.509999000  | -0.594845000 | 4.851019000  | C                                                                                         | -1.600561000  | -0.647539000 | 4.763655000  |
| C                                                                                         | -2.026007000  | 1.817530000  | 4.961602000  | C                                                                                         | -2.163433000  | 1.765274000  | 5.008895000  |
| C                                                                                         | -2.863263000  | -0.819542000 | 4.986093000  | C                                                                                         | -3.023699000  | -0.913349000 | 4.932573000  |
| C                                                                                         | -1.071172000  | 0.765321000  | 4.781019000  | C                                                                                         | -1.207633000  | 0.743700000  | 4.687292000  |
| C                                                                                         | -1.592753000  | 3.164392000  | 4.897120000  | C                                                                                         | -1.760177000  | 3.108389000  | 4.963435000  |
| H                                                                                         | 0.995393000   | 0.330388000  | 4.300166000  | H                                                                                         | 0.761803000   | 0.372995000  | 3.915907000  |
| C                                                                                         | -0.279624000  | 3.468556000  | 4.635104000  | C                                                                                         | -0.456300000  | 3.470162000  | 4.564843000  |
| H                                                                                         | -2.326528000  | 3.952819000  | 5.044401000  | H                                                                                         | -2.477795000  | 3.878597000  | 5.233697000  |
| H                                                                                         | 0.041518000   | 4.504672000  | 4.580510000  | H                                                                                         | -0.172130000  | 4.518075000  | 4.544486000  |
| C                                                                                         | 0.653000000   | 2.433066000  | 4.414405000  | C                                                                                         | 0.437670000   | 2.493429000  | 4.189605000  |
| H                                                                                         | 1.683866000   | 2.680109000  | 4.177274000  | H                                                                                         | 1.438037000   | 2.753699000  | 3.858002000  |
| C                                                                                         | 0.269208000   | 1.115005000  | 4.485440000  | C                                                                                         | 0.054382000   | 1.132031000  | 4.235488000  |
| C                                                                                         | -0.782276000  | -2.704013000 | 3.774252000  | C                                                                                         | -0.860564000  | -2.796878000 | 3.795076000  |
| C                                                                                         | -0.579446000  | -1.740522000 | 4.741363000  | C                                                                                         | -0.657421000  | -1.740649000 | 4.689854000  |
| C                                                                                         | 1.173109000   | -3.936072000 | 4.378440000  | C                                                                                         | 1.221024000   | -3.853087000 | 4.322637000  |
| C                                                                                         | 0.517536000   | -1.925230000 | 5.640910000  | C                                                                                         | 0.531715000   | -1.807949000 | 5.510488000  |
| C                                                                                         | 0.077937000   | -3.792721000 | 3.566413000  | C                                                                                         | 0.053674000   | -3.829526000 | 3.592369000  |
| C                                                                                         | 1.410005000   | -3.027127000 | 5.437793000  | C                                                                                         | 1.478047000   | -2.859383000 | 5.299059000  |
| C                                                                                         | 0.731997000   | -1.083267000 | 6.760449000  | C                                                                                         | 0.757573000   | -0.913437000 | 6.580159000  |
| H                                                                                         | -0.143209000  | -4.493295000 | 2.767392000  | H                                                                                         | -0.164543000  | -4.580323000 | 2.839176000  |
| H                                                                                         | 3.179385000   | -4.038470000 | 6.146734000  | H                                                                                         | 3.360567000   | -3.712545000 | 5.916503000  |
| H                                                                                         | 1.859145000   | -4.765874000 | 4.231381000  | H                                                                                         | 1.948265000   | -4.644900000 | 4.167073000  |
| C                                                                                         | 1.794814000   | -1.293311000 | 7.606505000  | C                                                                                         | 1.893703000   | -1.002565000 | 7.353873000  |
| H                                                                                         | 0.040650000   | -0.269873000 | 6.954093000  | H                                                                                         | 0.020422000   | -0.147855000 | 6.798033000  |
| H                                                                                         | 1.936903000   | -0.640170000 | 8.462814000  | H                                                                                         | 2.042162000   | -0.303207000 | 8.171695000  |
| C                                                                                         | 2.698670000   | -2.352828000 | 7.379627000  | C                                                                                         | 2.856516000   | -1.998995000 | 7.102653000  |
| H                                                                                         | 3.537824000   | -2.500677000 | 8.053167000  | H                                                                                         | 3.752248000   | -2.054576000 | 7.714441000  |
| C                                                                                         | 2.503902000   | -3.204548000 | 6.320247000  | C                                                                                         | 2.643739000   | -2.916270000 | 6.100981000  |
| O                                                                                         | -3.341592000  | -2.145825000 | 4.966809000  | O                                                                                         | -3.447139000  | -2.253334000 | 4.935649000  |
| O                                                                                         | -1.887415000  | -2.591229000 | 2.917212000  | O                                                                                         | -1.968174000  | -2.764979000 | 2.935175000  |
| P                                                                                         | -3.360055000  | -2.866418000 | 3.526787000  | P                                                                                         | -3.446091000  | -3.029058000 | 3.525951000  |
| O                                                                                         | -4.370618000  | -2.327044000 | 2.556272000  | O                                                                                         | -4.446891000  | -2.535601000 | 2.521460000  |
| C                                                                                         | -3.553781000  | -4.588782000 | 3.920860000  | C                                                                                         | -3.632834000  | -4.735047000 | 3.982036000  |
| C                                                                                         | -3.750420000  | -7.314008000 | 4.396021000  | C                                                                                         | -3.813600000  | -7.440635000 | 4.563926000  |
| C                                                                                         | -4.225388000  | -5.404598000 | 3.002959000  | C                                                                                         | -4.317763000  | -5.586568000 | 3.107367000  |
| C                                                                                         | -2.975693000  | -5.132640000 | 5.075164000  | C                                                                                         | -3.033288000  | -5.233454000 | 5.146231000  |
| C                                                                                         | -3.080426000  | -6.498776000 | 5.306714000  | C                                                                                         | -3.130092000  | -6.590129000 | 5.431187000  |
| C                                                                                         | -4.321760000  | -6.769173000 | 3.248069000  | C                                                                                         | -4.406433000  | -6.940846000 | 3.406187000  |
| H                                                                                         | -4.667470000  | -4.972934000 | 2.109509000  | H                                                                                         | -4.776569000  | -5.189845000 | 2.206344000  |
| H                                                                                         | -2.455528000  | -4.497204000 | 5.785637000  | H                                                                                         | -2.503674000  | -4.570430000 | 5.823940000  |
| H                                                                                         | -2.639128000  | -6.927403000 | 6.201324000  | H                                                                                         | -2.672292000  | -6.983543000 | 6.333671000  |
| H                                                                                         | -4.845557000  | -7.406626000 | 2.542372000  | H                                                                                         | -4.940433000  | -7.605968000 | 2.734514000  |
| H                                                                                         | -3.829352000  | -8.381044000 | 4.583953000  | H                                                                                         | -3.886290000  | -8.499943000 | 4.793477000  |
| H                                                                                         | -5.540897000  | 1.444672000  | 3.019184000  | H                                                                                         | -5.588654000  | 1.268256000  | 3.150405000  |
| C                                                                                         | -6.618045000  | 1.580077000  | 3.042921000  | C                                                                                         | -6.660948000  | 1.439973000  | 3.139376000  |
| H                                                                                         | -6.793016000  | 1.679665000  | 5.170213000  | H                                                                                         | -6.907682000  | 1.501754000  | 5.261116000  |
| C                                                                                         | -7.314772000  | 1.704839000  | 4.217009000  | C                                                                                         | -7.393905000  | 1.565362000  | 4.291085000  |
| C                                                                                         | -8.685892000  | 1.824884000  | 1.741317000  | C                                                                                         | -8.670753000  | 1.789291000  | 1.772379000  |
| C                                                                                         | -8.724790000  | 1.835113000  | 4.210292000  | C                                                                                         | -8.797176000  | 1.746714000  | 4.238369000  |
| C                                                                                         | -7.323308000  | 1.633806000  | 1.832702000  | C                                                                                         | -7.319991000  | 1.544783000  | 1.906387000  |
| C                                                                                         | -9.428769000  | 1.874602000  | 2.963579000  | C                                                                                         | -9.454437000  | 1.838193000  | 2.969077000  |
| C                                                                                         | -9.457192000  | 1.897696000  | 5.421123000  | C                                                                                         | -9.569343000  | 1.810262000  | 5.424274000  |
| H                                                                                         | -11.394713000 | 1.899950000  | 2.055335000  | H                                                                                         | -11.385924000 | 1.951666000  | 1.994842000  |
| C                                                                                         | -10.828798000 | 1.964516000  | 5.411125000  | C                                                                                         | -10.936501000 | 1.926291000  | 5.368368000  |
| H                                                                                         | -8.909710000  | 1.877743000  | 6.360101000  | H                                                                                         | -9.056397000  | 1.750763000  | 6.380923000  |
| H                                                                                         | -11.381284000 | 2.006351000  | 6.345290000  | H                                                                                         | -11.519911000 | 1.968178000  | 6.283538000  |
| C                                                                                         | -11.525341000 | 1.957835000  | 4.184085000  | C                                                                                         | -11.588814000 | 1.969833000  | 4.118072000  |
| H                                                                                         | -12.611401000 | 1.980477000  | 4.182599000  | H                                                                                         | -12.672705000 | 2.030687000  | 4.079285000  |
| C                                                                                         | -10.844766000 | 1.914289000  | 2.990509000  | C                                                                                         | -10.868321000 | 1.927485000  | 2.948135000  |
| C                                                                                         | -9.130929000  | 0.935989000  | -0.527558000 | C                                                                                         | -9.068174000  | 0.975345000  | -0.533063000 |
| C                                                                                         | -9.327881000  | 1.928197000  | 0.411862000  | C                                                                                         | -9.261835000  | 1.949929000  | 0.425118000  |
| C                                                                                         | -10.567392000 | 1.966101000  | -2.135325000 | C                                                                                         | -10.409867000 | 2.097006000  | -2.160912000 |
| C                                                                                         | -10.122023000 | 3.055456000  | 0.028166000  | C                                                                                         | -10.001319000 | 3.114893000  | 0.044435000  |

|                                                                             |               |              |              |                                                                                           |               |              |              |
|-----------------------------------------------------------------------------|---------------|--------------|--------------|-------------------------------------------------------------------------------------------|---------------|--------------|--------------|
| C                                                                           | -9.743891000  | 0.926175000  | -1.789573000 | C                                                                                         | -9.636412000  | 1.019603000  | -1.815032000 |
| C                                                                           | -10.761127000 | 3.056618000  | -1.253585000 | C                                                                                         | -10.595066000 | 3.171386000  | -1.257797000 |
| C                                                                           | -10.262015000 | 4.200822000  | 0.850731000  | C                                                                                         | -10.128582000 | 4.244095000  | 0.891029000  |
| H                                                                           | -9.550868000  | 0.096841000  | -2.462700000 | H                                                                                         | -9.449194000  | 0.201092000  | -2.502894000 |
| H                                                                           | -12.045884000 | 4.148396000  | -2.600906000 | H                                                                                         | -11.791771000 | 4.342523000  | -2.619337000 |
| H                                                                           | -11.060095000 | 1.976011000  | -3.103786000 | H                                                                                         | -10.867777000 | 2.149229000  | -3.144957000 |
| C                                                                           | -11.028812000 | 5.268105000  | 0.447776000  | C                                                                                         | -10.842095000 | 5.348498000  | 0.489964000  |
| H                                                                           | -9.747551000  | 4.236186000  | 1.805234000  | H                                                                                         | -9.646563000  | 4.237933000  | 1.862953000  |
| H                                                                           | -11.116988000 | 6.139263000  | 1.090672000  | H                                                                                         | -10.921022000 | 6.206217000  | 1.151852000  |
| C                                                                           | -11.695409000 | 5.248223000  | -0.795652000 | C                                                                                         | -11.465428000 | 5.383902000  | -0.775292000 |
| H                                                                           | -12.303466000 | 6.096545000  | -1.096132000 | H                                                                                         | -12.031738000 | 6.261204000  | -1.074148000 |
| C                                                                           | -11.557065000 | 4.166383000  | -1.630042000 | C                                                                                         | -11.336917000 | 4.318624000  | -1.632222000 |
| O                                                                           | -6.570340000  | 1.517449000  | 0.650711000  | O                                                                                         | -6.528419000  | 1.430073000  | 0.750613000  |
| O                                                                           | -8.292301000  | -0.147264000 | -0.215820000 | O                                                                                         | -8.278789000  | -0.144511000 | -0.222064000 |
| P                                                                           | -6.700395000  | 0.146337000  | -0.181391000 | P                                                                                         | -6.680002000  | 0.096256000  | -0.136842000 |
| O                                                                           | -6.076607000  | -1.076121000 | 0.430066000  | O                                                                                         | -6.109523000  | -1.168067000 | 0.441454000  |
| C                                                                           | -6.105161000  | 0.595313000  | -1.796946000 | C                                                                                         | -6.032061000  | 0.588116000  | -1.719764000 |
| C                                                                           | -5.244254000  | 1.207436000  | -4.362351000 | C                                                                                         | -5.090180000  | 1.271087000  | -4.238513000 |
| C                                                                           | -5.503910000  | -0.395772000 | -2.580945000 | C                                                                                         | -5.464190000  | -0.395416000 | -2.537517000 |
| C                                                                           | -6.280719000  | 1.893075000  | -2.294567000 | C                                                                                         | -6.134669000  | 1.913654000  | -2.160900000 |
| C                                                                           | -5.847100000  | 2.191356000  | -3.580520000 | C                                                                                         | -5.660596000  | 2.247459000  | -3.423698000 |
| C                                                                           | -5.072475000  | -0.082104000 | -3.864081000 | C                                                                                         | -4.991893000  | -0.046529000 | -3.796871000 |
| H                                                                           | -5.361942000  | -1.398190000 | -2.186383000 | H                                                                                         | -5.379023000  | -1.420456000 | -2.187064000 |
| H                                                                           | -6.743669000  | 2.661772000  | -1.683462000 | H                                                                                         | -6.572822000  | 2.675639000  | -1.523790000 |
| H                                                                           | -5.975519000  | 3.196426000  | -3.970649000 | H                                                                                         | -5.732077000  | 3.274073000  | -3.769851000 |
| H                                                                           | -4.596817000  | -0.845484000 | -4.472256000 | H                                                                                         | -4.541785000  | -0.804612000 | -4.430582000 |
| H                                                                           | -4.903146000  | 1.449149000  | -5.365041000 | H                                                                                         | -4.717056000  | 1.540365000  | -5.222606000 |
| Zn                                                                          | -4.117461000  | -1.520389000 | 0.715288000  | Zn                                                                                        | -4.160021000  | -1.678017000 | 0.709312000  |
| Br                                                                          | -3.503792000  | -3.307606000 | -0.747786000 | Br                                                                                        | -3.590640000  | -3.438159000 | -0.799867000 |
| Br                                                                          | -2.901867000  | 0.532095000  | 0.880239000  | Br                                                                                        | -2.902333000  | 0.342773000  | 0.929977000  |
| <b>[ZnBr<sub>2</sub>{O=PPh(BINOL)}<sub>2</sub>] (singlet state, B97-3c)</b> |               |              |              | <b>[ZnBr<sub>2</sub>{O=PPh(BINOL)}<sub>2</sub>] (S<sub>1</sub> singlet state, B97-3c)</b> |               |              |              |
| H                                                                           | -4.883908000  | -0.125489000 | 5.340024000  | H                                                                                         | -4.881060000  | -0.081611000 | 5.417824000  |
| C                                                                           | -3.852320000  | 0.152761000  | 5.184875000  | C                                                                                         | -3.841888000  | 0.160611000  | 5.216275000  |
| H                                                                           | -4.165682000  | 2.252128000  | 5.332009000  | H                                                                                         | -4.075015000  | 2.278929000  | 5.449290000  |
| C                                                                           | -3.447747000  | 1.458541000  | 5.174405000  | C                                                                                         | -3.380920000  | 1.467230000  | 5.240186000  |
| C                                                                           | -1.560858000  | -0.610708000 | 4.805668000  | C                                                                                         | -1.571138000  | -0.655602000 | 4.739789000  |
| C                                                                           | -2.101669000  | 1.792368000  | 4.915154000  | C                                                                                         | -2.032116000  | 1.771189000  | 4.939519000  |
| C                                                                           | -2.903671000  | -0.853206000 | 4.985129000  | C                                                                                         | -2.955295000  | -0.869759000 | 4.920855000  |
| C                                                                           | -1.143127000  | 0.751210000  | 4.708737000  | C                                                                                         | -1.111518000  | 0.708104000  | 4.667766000  |
| C                                                                           | -1.688192000  | 3.138894000  | 4.822421000  | C                                                                                         | -1.597297000  | 3.114041000  | 4.843646000  |
| H                                                                           | 0.902438000   | 0.345040000  | 4.158235000  | H                                                                                         | 0.882555000   | 0.253640000  | 3.953725000  |
| C                                                                           | -0.393141000  | 3.456959000  | 4.510473000  | C                                                                                         | -0.299626000  | 3.409184000  | 4.454882000  |
| H                                                                           | -2.421872000  | 3.917070000  | 4.988185000  | H                                                                                         | -2.306382000  | 3.911322000  | 5.058961000  |
| H                                                                           | -0.089476000  | 4.492218000  | 4.434282000  | H                                                                                         | 0.024553000   | 4.444641000  | 4.375282000  |
| C                                                                           | 0.540286000   | 2.434432000  | 4.266057000  | C                                                                                         | 0.587193000   | 2.368423000  | 4.137691000  |
| H                                                                           | 1.554524000   | 2.690235000  | 3.990712000  | H                                                                                         | 1.595831000   | 2.599681000  | 3.801247000  |
| C                                                                           | 0.175857000   | 1.116416000  | 4.362869000  | C                                                                                         | 0.189292000   | 1.041133000  | 4.235991000  |
| C                                                                           | -0.814701000  | -2.716247000 | 3.737815000  | C                                                                                         | -0.888559000  | -2.835831000 | 3.759327000  |
| C                                                                           | -0.614082000  | -1.737351000 | 4.686688000  | C                                                                                         | -0.658860000  | -1.791653000 | 4.677564000  |
| C                                                                           | 1.180797000   | -3.887373000 | 4.318032000  | C                                                                                         | 1.199864000   | -3.895912000 | 4.284782000  |
| C                                                                           | 0.503594000   | -1.882351000 | 5.563228000  | C                                                                                         | 0.508234000   | -1.882076000 | 5.522083000  |
| C                                                                           | 0.066517000   | -3.783142000 | 3.532611000  | C                                                                                         | 0.037100000   | -3.857360000 | 3.536371000  |
| C                                                                           | 1.419694000   | -2.961206000 | 5.355565000  | C                                                                                         | 1.452038000   | -2.937731000 | 5.297416000  |
| C                                                                           | 0.721702000   | -1.024947000 | 6.664274000  | C                                                                                         | 0.715853000   | -1.023303000 | 6.624788000  |
| H                                                                           | -0.154428000  | -4.500138000 | 2.755680000  | H                                                                                         | -0.173004000  | -4.597091000 | 2.768439000  |
| H                                                                           | 3.225050000   | -3.909061000 | 6.036559000  | H                                                                                         | 3.308741000   | -3.842957000 | 5.934341000  |
| H                                                                           | 1.878789000   | -4.699894000 | 4.166914000  | H                                                                                         | 1.923756000   | -4.691624000 | 4.117986000  |
| C                                                                           | 1.805923000   | -1.192616000 | 7.486126000  | C                                                                                         | 1.840500000   | -1.153886000 | 7.424599000  |
| H                                                                           | 0.017812000   | -0.231881000 | 6.864244000  | H                                                                                         | -0.018689000  | -0.258356000 | 6.860367000  |
| H                                                                           | 1.948780000   | -0.526515000 | 8.326331000  | H                                                                                         | 1.978925000   | -0.477394000 | 8.265865000  |
| C                                                                           | 2.730000000   | -2.226328000 | 7.253048000  | C                                                                                         | 2.795247000   | -2.154050000 | 7.167532000  |
| H                                                                           | 3.584485000   | -2.342233000 | 7.905904000  | H                                                                                         | 3.675232000   | -2.242204000 | 7.801585000  |
| C                                                                           | 2.533827000   | -3.095057000 | 6.212592000  | C                                                                                         | 2.597473000   | -3.040616000 | 6.123931000  |
| O                                                                           | -3.370804000  | -2.180899000 | 4.978394000  | O                                                                                         | -3.460642000  | -2.164107000 | 4.938513000  |
| O                                                                           | -1.941362000  | -2.651952000 | 2.908774000  | O                                                                                         | -2.002811000  | -2.809477000 | 2.936966000  |
| P                                                                           | -3.404882000  | -2.933636000 | 3.549413000  | P                                                                                         | -3.511552000  | -3.021401000 | 3.544447000  |
| O                                                                           | -4.439888000  | -2.429943000 | 2.584504000  | O                                                                                         | -4.504062000  | -2.546079000 | 2.522815000  |
| C                                                                           | -3.563603000  | -4.649024000 | 3.980272000  | C                                                                                         | -3.717897000  | -4.699252000 | 4.100716000  |
| C                                                                           | -3.706789000  | -7.360251000 | 4.515277000  | C                                                                                         | -3.957395000  | -7.365507000 | 4.843992000  |
| C                                                                           | -4.234069000  | -5.493664000 | 3.094161000  | C                                                                                         | -4.429720000  | -5.585390000 | 3.276412000  |
| C                                                                           | -2.959122000  | -5.158451000 | 5.131288000  | C                                                                                         | -3.118808000  | -5.141112000 | 5.291868000  |

|                                                                                          |               |              |              |                                                                                         |               |              |              |
|------------------------------------------------------------------------------------------|---------------|--------------|--------------|-----------------------------------------------------------------------------------------|---------------|--------------|--------------|
| C                                                                                        | -3.036705000  | -6.516729000 | 5.393088000  | C                                                                                       | -3.245969000  | -6.479171000 | 5.658127000  |
| C                                                                                        | -4.303377000  | -6.849861000 | 3.368978000  | C                                                                                       | -4.546560000  | -6.920530000 | 3.657459000  |
| H                                                                                        | -4.694577000  | -5.091292000 | 2.203050000  | H                                                                                       | -4.886090000  | -5.230554000 | 2.354462000  |
| H                                                                                        | -2.439128000  | -4.503123000 | 5.814595000  | H                                                                                       | -2.569051000  | -4.450006000 | 5.927399000  |
| H                                                                                        | -2.574699000  | -6.916525000 | 6.284845000  | H                                                                                       | -2.791470000  | -6.829926000 | 6.582793000  |
| H                                                                                        | -4.824892000  | -7.507811000 | 2.688193000  | H                                                                                       | -5.101033000  | -7.613416000 | 3.027574000  |
| H                                                                                        | -3.764335000  | -8.419535000 | 4.725870000  | H                                                                                       | -4.053743000  | -8.409822000 | 5.137332000  |
| H                                                                                        | -5.608009000  | 1.330212000  | 3.106052000  | H                                                                                       | -5.544746000  | 1.230724000  | 3.016152000  |
| C                                                                                        | -6.675420000  | 1.491256000  | 3.102997000  | C                                                                                       | -6.620441000  | 1.393009000  | 3.030859000  |
| H                                                                                        | -6.898668000  | 1.566131000  | 5.217897000  | H                                                                                       | -6.815912000  | 1.490221000  | 5.179717000  |
| C                                                                                        | -7.395518000  | 1.616335000  | 4.258396000  | C                                                                                       | -7.326708000  | 1.535639000  | 4.219340000  |
| C                                                                                        | -8.695391000  | 1.796334000  | 1.756526000  | C                                                                                       | -8.670270000  | 1.746506000  | 1.684282000  |
| C                                                                                        | -8.797362000  | 1.776025000  | 4.220266000  | C                                                                                       | -8.737550000  | 1.713008000  | 4.190406000  |
| C                                                                                        | -7.341584000  | 1.575650000  | 1.877416000  | C                                                                                       | -7.292029000  | 1.498932000  | 1.816259000  |
| C                                                                                        | -9.466458000  | 1.844701000  | 2.957734000  | C                                                                                       | -9.426443000  | 1.777504000  | 2.925393000  |
| C                                                                                        | -9.558268000  | 1.838342000  | 5.407917000  | C                                                                                       | -9.496762000  | 1.793517000  | 5.388365000  |
| H                                                                                        | -11.402133000 | 1.920309000  | 2.009711000  | H                                                                                       | -11.374889000 | 1.803365000  | 1.995168000  |
| C                                                                                        | -10.923983000 | 1.932627000  | 5.365028000  | C                                                                                       | -10.878300000 | 1.880152000  | 5.363781000  |
| H                                                                                        | -9.039173000  | 1.795653000  | 6.356662000  | H                                                                                       | -8.964977000  | 1.771677000  | 6.340645000  |
| H                                                                                        | -11.496557000 | 1.973220000  | 6.281697000  | H                                                                                       | -11.440309000 | 1.935814000  | 6.296086000  |
| C                                                                                        | -11.586078000 | 1.954961000  | 4.124938000  | C                                                                                       | -11.555719000 | 1.868793000  | 4.129646000  |
| H                                                                                        | -12.666413000 | 1.999834000  | 4.095570000  | H                                                                                       | -12.644810000 | 1.895795000  | 4.104395000  |
| C                                                                                        | -10.876920000 | 1.912077000  | 2.952486000  | C                                                                                       | -10.840281000 | 1.812063000  | 2.942119000  |
| C                                                                                        | -9.116346000  | 0.964347000  | -0.536106000 | C                                                                                       | -9.055834000  | 1.005991000  | -0.676230000 |
| C                                                                                        | -9.303618000  | 1.940565000  | 0.419050000  | C                                                                                       | -9.283943000  | 1.924774000  | 0.372566000  |
| C                                                                                        | -10.492905000 | 2.070696000  | -2.140600000 | C                                                                                       | -10.573706000 | 2.099067000  | -2.192176000 |
| C                                                                                        | -10.057797000 | 3.095148000  | 0.047862000  | C                                                                                       | -10.125223000 | 3.065347000  | 0.046174000  |
| C                                                                                        | -9.703681000  | 1.005950000  | -1.804980000 | C                                                                                       | -9.671959000  | 1.072959000  | -1.920377000 |
| C                                                                                        | -10.675581000 | 3.142597000  | -1.241404000 | C                                                                                       | -10.800164000 | 3.120542000  | -1.228152000 |
| C                                                                                        | -10.180885000 | 4.223877000  | 0.887901000  | C                                                                                       | -10.263953000 | 4.171304000  | 0.915635000  |
| H                                                                                        | -9.517611000  | 0.194604000  | -2.493219000 | H                                                                                       | -9.453253000  | 0.301101000  | -2.656266000 |
| H                                                                                        | -11.905796000 | 4.295404000  | -2.575948000 | H                                                                                       | -12.181951000 | 4.241785000  | -2.456131000 |
| H                                                                                        | -10.963119000 | 2.113963000  | -3.113822000 | H                                                                                       | -11.077505000 | 2.149800000  | -3.156064000 |
| C                                                                                        | -10.911583000 | 5.316867000  | 0.499850000  | C                                                                                       | -11.091967000 | 5.246032000  | 0.610751000  |
| H                                                                                        | -9.683714000  | 4.227526000  | 1.845623000  | H                                                                                       | -9.713867000  | 4.172033000  | 1.853869000  |
| H                                                                                        | -10.986379000 | 6.171734000  | 1.158313000  | H                                                                                       | -11.176282000 | 6.078564000  | 1.308989000  |
| C                                                                                        | -11.557486000 | 5.341798000  | -0.748713000 | C                                                                                       | -11.808047000 | 5.263084000  | -0.598190000 |
| H                                                                                        | -12.136166000 | 6.208402000  | -1.038376000 | H                                                                                       | -12.465267000 | 6.100007000  | -0.834867000 |
| C                                                                                        | -11.433893000 | 4.277766000  | -1.602089000 | C                                                                                       | -11.653228000 | 4.222203000  | -1.502110000 |
| O                                                                                        | -6.560472000  | 1.449387000  | 0.718577000  | O                                                                                       | -6.488759000  | 1.453527000  | 0.637723000  |
| O                                                                                        | -8.307785000  | -0.143863000 | -0.242972000 | O                                                                                       | -8.210354000  | -0.119943000 | -0.442451000 |
| P                                                                                        | -6.703414000  | 0.101656000  | -0.157217000 | P                                                                                       | -6.617217000  | 0.149183000  | -0.306040000 |
| O                                                                                        | -6.136559000  | -1.157477000 | 0.437854000  | O                                                                                       | -6.029060000  | -1.143753000 | 0.242011000  |
| C                                                                                        | -6.055171000  | 0.578677000  | -1.741691000 | C                                                                                       | -5.922247000  | 0.698733000  | -1.855851000 |
| C                                                                                        | -5.117546000  | 1.246639000  | -4.259018000 | C                                                                                       | -4.943293000  | 1.503784000  | -4.338954000 |
| C                                                                                        | -5.449948000  | -0.396400000 | -2.535382000 | C                                                                                       | -5.113677000  | -0.172571000 | -2.602138000 |
| C                                                                                        | -6.198358000  | 1.887195000  | -2.207840000 | C                                                                                       | -6.247886000  | 1.973336000  | -2.354625000 |
| C                                                                                        | -5.726261000  | 2.213965000  | -3.468525000 | C                                                                                       | -5.754148000  | 2.367389000  | -3.597538000 |
| C                                                                                        | -4.978805000  | -0.054492000 | -3.792265000 | C                                                                                       | -4.621605000  | 0.237173000  | -3.839660000 |
| H                                                                                        | -5.330582000  | -1.405442000 | -2.167237000 | H                                                                                       | -4.861444000  | -1.157219000 | -2.212938000 |
| H                                                                                        | -6.664129000  | 2.641386000  | -1.591091000 | H                                                                                       | -6.872130000  | 2.648435000  | -1.774256000 |
| H                                                                                        | -5.830114000  | 3.226704000  | -3.832053000 | H                                                                                       | -6.001961000  | 3.353794000  | -3.986459000 |
| H                                                                                        | -4.499271000  | -0.804784000 | -4.405091000 | H                                                                                       | -3.986120000  | -0.433802000 | -4.415282000 |
| H                                                                                        | -4.747079000  | 1.509401000  | -5.240616000 | H                                                                                       | -4.558232000  | 1.819351000  | -5.307844000 |
| Zn                                                                                       | -4.162343000  | -1.602286000 | 0.737497000  | Zn                                                                                      | -4.112024000  | -1.497345000 | 0.742489000  |
| Br                                                                                       | -3.562124000  | -3.382794000 | -0.735844000 | Br                                                                                      | -3.179785000  | -3.162026000 | -0.733050000 |
| Br                                                                                       | -2.951000000  | 0.442573000  | 0.921199000  | Br                                                                                      | -2.816466000  | 0.422071000  | 1.372512000  |
| <b>[MnBr<sub>2</sub>{O=PPh(BINOL)}<sub>2</sub>] (sextet state, r<sup>2</sup>SCAN-3c)</b> |               |              |              | <b>[MnBr<sub>2</sub>{O=PPh(BINOL)}<sub>2</sub>] (octet state, r<sup>2</sup>SCAN-3c)</b> |               |              |              |
| H                                                                                        | -4.883010000  | -0.169211000 | 5.391888000  | H                                                                                       | -4.913989000  | -0.238054000 | 5.412243000  |
| C                                                                                        | -3.845300000  | 0.116110000  | 5.250956000  | C                                                                                       | -3.880225000  | 0.057510000  | 5.262381000  |
| H                                                                                        | -4.166302000  | 2.223568000  | 5.395915000  | H                                                                                       | -4.213959000  | 2.159201000  | 5.508357000  |
| C                                                                                        | -3.442488000  | 1.426370000  | 5.247461000  | C                                                                                       | -3.485014000  | 1.375524000  | 5.321030000  |
| C                                                                                        | -1.536792000  | -0.640117000 | 4.897540000  | C                                                                                       | -1.559126000  | -0.680218000 | 4.884262000  |
| C                                                                                        | -2.088387000  | 1.764181000  | 5.010969000  | C                                                                                       | -2.130277000  | 1.728580000  | 5.107674000  |
| C                                                                                        | -2.883061000  | -0.885132000 | 5.063193000  | C                                                                                       | -2.924836000  | -0.928551000 | 5.031859000  |
| C                                                                                        | -1.120875000  | 0.726600000  | 4.813947000  | C                                                                                       | -1.157327000  | 0.708808000  | 4.864107000  |
| C                                                                                        | -1.679143000  | 3.117640000  | 4.930616000  | C                                                                                       | -1.733166000  | 3.087425000  | 5.083725000  |
| H                                                                                        | 0.941121000   | 0.323479000  | 4.286931000  | H                                                                                       | 0.888555000   | 0.350166000  | 4.264832000  |
| C                                                                                        | -0.377532000  | 3.441736000  | 4.637225000  | C                                                                                       | -0.437041000  | 3.437768000  | 4.789256000  |
| H                                                                                        | -2.422722000  | 3.894394000  | 5.090225000  | H                                                                                       | -2.482204000  | 3.849420000  | 5.283868000  |
| H                                                                                        | -0.074241000  | 4.482480000  | 4.569831000  | H                                                                                       | -0.144075000  | 4.483369000  | 4.766208000  |

|   |               |              |              |   |               |              |              |
|---|---------------|--------------|--------------|---|---------------|--------------|--------------|
| C | 0.566428000   | 2.420462000  | 4.399918000  | C | 0.506083000   | 2.436902000  | 4.485872000  |
| H | 1.587140000   | 2.683569000  | 4.137450000  | H | 1.519425000   | 2.716055000  | 4.211934000  |
| C | 0.206387000   | 1.096630000  | 4.486004000  | C | 0.152833000   | 1.106080000  | 4.518482000  |
| C | -0.799908000  | -2.734411000 | 3.798712000  | C | -0.845373000  | -2.827917000 | 3.767882000  |
| C | -0.590069000  | -1.769889000 | 4.763149000  | C | -0.622818000  | -1.775785000 | 4.757815000  |
| C | 1.194684000   | -3.929298000 | 4.343749000  | C | 1.332096000   | -3.764211000 | 4.154775000  |
| C | 0.534830000   | -1.935525000 | 5.631246000  | C | 0.570883000   | -1.885942000 | 5.567209000  |
| C | 0.074623000   | -3.805638000 | 3.563125000  | C | 0.092221000   | -3.753312000 | 3.453054000  |
| C | 1.443097000   | -3.018758000 | 5.399031000  | C | 1.568205000   | -2.860875000 | 5.225842000  |
| C | 0.764148000   | -1.092175000 | 6.746698000  | C | 0.761675000   | -1.115500000 | 6.716748000  |
| H | -0.155173000  | -4.507943000 | 2.768076000  | H | -0.104008000  | -4.464708000 | 2.657177000  |
| H | 3.252507000   | -3.995441000 | 6.053424000  | H | 3.507005000   | -3.646039000 | 5.712366000  |
| H | 1.892901000   | -4.744667000 | 4.174907000  | H | 2.082471000   | -4.508643000 | 3.909139000  |
| C | 1.855135000   | -1.282651000 | 7.560956000  | C | 1.950455000   | -1.204319000 | 7.479777000  |
| H | 0.062198000   | -0.293390000 | 6.961909000  | H | -0.015181000  | -0.424498000 | 7.028854000  |
| H | 2.008794000   | -0.628801000 | 8.414714000  | H | 2.071850000   | -0.567492000 | 8.350544000  |
| C | 2.773332000   | -2.322928000 | 7.304707000  | C | 2.936498000   | -2.089989000 | 7.111372000  |
| H | 3.634494000   | -2.455111000 | 7.953261000  | H | 3.858833000   | -2.161779000 | 7.680071000  |
| C | 2.565375000   | -3.176054000 | 6.248971000  | C | 2.740997000   | -2.927263000 | 5.991390000  |
| O | -3.340737000  | -2.220322000 | 5.062693000  | O | -3.375694000  | -2.266794000 | 5.071383000  |
| O | -1.933123000  | -2.642605000 | 2.974718000  | O | -2.004676000  | -2.771784000 | 2.991562000  |
| P | -3.379462000  | -2.952440000 | 3.630959000  | P | -3.455224000  | -3.029037000 | 3.660413000  |
| O | -4.416590000  | -2.438907000 | 2.671312000  | O | -4.482992000  | -2.504285000 | 2.696536000  |
| C | -3.524679000  | -4.676323000 | 4.033104000  | C | -3.636230000  | -4.738254000 | 4.094844000  |
| C | -3.642934000  | -7.403426000 | 4.520535000  | C | -3.795278000  | -7.453835000 | 4.631268000  |
| C | -4.190160000  | -5.512444000 | 3.128847000  | C | -4.384093000  | -5.567179000 | 3.250169000  |
| C | -2.913337000  | -5.200548000 | 5.179438000  | C | -2.960520000  | -5.264322000 | 5.204341000  |
| C | -2.978921000  | -6.568002000 | 5.417122000  | C | -3.047809000  | -6.626231000 | 5.467001000  |
| C | -4.247312000  | -6.877885000 | 3.380459000  | C | -4.462305000  | -6.926479000 | 3.526948000  |
| H | -4.658552000  | -5.096502000 | 2.241469000  | H | -4.898736000  | -5.149527000 | 2.389760000  |
| H | -2.397478000  | -4.549139000 | 5.878496000  | H | -2.381892000  | -4.618667000 | 5.858315000  |
| H | -2.511545000  | -6.981804000 | 6.305415000  | H | -2.531786000  | -7.041653000 | 6.327201000  |
| H | -4.766021000  | -7.531393000 | 2.685824000  | H | -5.045224000  | -7.574384000 | 2.879654000  |
| H | -3.691080000  | -8.471451000 | 4.713116000  | H | -3.859492000  | -8.517389000 | 4.842936000  |
| H | -5.541410000  | 1.445875000  | 2.935652000  | H | -5.557535000  | 1.377465000  | 2.962269000  |
| C | -6.617652000  | 1.588111000  | 2.971300000  | C | -6.632129000  | 1.534299000  | 2.985984000  |
| H | -6.775956000  | 1.649009000  | 5.101567000  | H | -6.815489000  | 1.578598000  | 5.114605000  |
| C | -7.304470000  | 1.695702000  | 4.153049000  | C | -7.331675000  | 1.641356000  | 4.160287000  |
| C | -8.696646000  | 1.866362000  | 1.692414000  | C | -8.691264000  | 1.853214000  | 1.684477000  |
| C | -8.713578000  | 1.835338000  | 4.160863000  | C | -8.738652000  | 1.801098000  | 4.152265000  |
| C | -7.334274000  | 1.668291000  | 1.769095000  | C | -7.332905000  | 1.634765000  | 1.775944000  |
| C | -9.428636000  | 1.900511000  | 2.921592000  | C | -9.437523000  | 1.887383000  | 2.905038000  |
| C | -9.434674000  | 1.881385000  | 5.379181000  | C | -9.473893000  | 1.846778000  | 5.362134000  |
| H | -11.402303000 | 1.952831000  | 2.031501000  | H | -11.399365000 | 1.975498000  | 1.991811000  |
| C | -10.805865000 | 1.956691000  | 5.382721000  | C | -10.843826000 | 1.941467000  | 5.349812000  |
| H | -8.878891000  | 1.841942000  | 6.312656000  | H | -8.930178000  | 1.791189000  | 6.301868000  |
| H | -11.349697000 | 1.985740000  | 6.322429000  | H | -11.398619000 | 1.969940000  | 6.283111000  |
| C | -11.513489000 | 1.975237000  | 4.162138000  | C | -11.536141000 | 1.980779000  | 4.121007000  |
| H | -12.599348000 | 2.004493000  | 4.170976000  | H | -12.621510000 | 2.025223000  | 4.116964000  |
| C | -10.844014000 | 1.948062000  | 2.961794000  | C | -10.852491000 | 1.954801000  | 2.928673000  |
| C | -9.165609000  | 1.006734000  | -0.582856000 | C | -9.144525000  | 1.020802000  | -0.604113000 |
| C | -9.349279000  | 1.988951000  | 0.369687000  | C | -9.325974000  | 1.996887000  | 0.355127000  |
| C | -10.609120000 | 2.062798000  | -2.166707000 | C | -10.552368000 | 2.111892000  | -2.196161000 |
| C | -10.141082000 | 3.124208000  | 0.005829000  | C | -10.097346000 | 3.146370000  | -0.007867000 |
| C | -9.788008000  | 1.014731000  | -1.840072000 | C | -9.750457000  | 1.049277000  | -1.869012000 |
| C | -10.790859000 | 3.143407000  | -1.270416000 | C | -10.730555000 | 3.186463000  | -1.291969000 |
| C | -10.269100000 | 4.260163000  | 0.843245000  | C | -10.220748000 | 4.276017000  | 0.838708000  |
| H | -9.604637000  | 0.192412000  | -2.524394000 | H | -9.570077000  | 0.230669000  | -2.558560000 |
| H | -12.082183000 | 4.256666000  | -2.593669000 | H | -11.989385000 | 4.329728000  | -2.620891000 |
| H | -11.109368000 | 2.086525000  | -3.131038000 | H | -11.039856000 | 2.151612000  | -3.166478000 |
| C | -11.034782000 | 5.335284000  | 0.459609000  | C | -10.966778000 | 5.365084000  | 0.455639000  |
| H | -9.746510000  | 4.282226000  | 1.793768000  | H | -9.710234000  | 4.282207000  | 1.796023000  |
| H | -11.113885000 | 6.198997000  | 1.113626000  | H | -11.042546000 | 6.223577000  | 1.116882000  |
| C | -11.711937000 | 5.333143000  | -0.778277000 | C | -11.627902000 | 5.383955000  | -0.790731000 |
| H | -12.318890000 | 6.187545000  | -1.063335000 | H | -12.219450000 | 6.249260000  | -1.075283000 |
| C | -11.585202000 | 4.260938000  | -1.626800000 | C | -11.504859000 | 4.318136000  | -1.647778000 |
| O | -6.594466000  | 1.564296000  | 0.575630000  | O | -6.580098000  | 1.529389000  | 0.590757000  |
| O | -8.331217000  | -0.086084000 | -0.289584000 | O | -8.330715000  | -0.087069000 | -0.310197000 |
| P | -6.738872000  | 0.196418000  | -0.257137000 | P | -6.734815000  | 0.169855000  | -0.254151000 |
| O | -6.112585000  | -1.026254000 | 0.353576000  | O | -6.136634000  | -1.066923000 | 0.356159000  |
| C | -6.128583000  | 0.628103000  | -1.870933000 | C | -6.095039000  | 0.603309000  | -1.856047000 |

|                                                                                                       |              |              |              |    |              |              |              |
|-------------------------------------------------------------------------------------------------------|--------------|--------------|--------------|----|--------------|--------------|--------------|
| C                                                                                                     | -5.226798000 | 1.216533000  | -4.427378000 | C  | -5.146313000 | 1.196086000  | -4.394357000 |
| C                                                                                                     | -5.519887000 | -0.372086000 | -2.638488000 | C  | -5.490589000 | -0.400675000 | -2.621951000 |
| C                                                                                                     | -6.291053000 | 1.922732000  | -2.380815000 | C  | -6.229966000 | 1.903996000  | -2.358579000 |
| C                                                                                                     | -5.837119000 | 2.209011000  | -3.662404000 | C  | -5.752581000 | 2.192400000  | -3.631118000 |
| C                                                                                                     | -5.068048000 | -0.070031000 | -3.917256000 | C  | -5.015118000 | -0.096467000 | -3.891615000 |
| H                                                                                                     | -5.392241000 | -1.373996000 | -2.237466000 | H  | -5.384120000 | -1.407264000 | -2.226412000 |
| H                                                                                                     | -6.759099000 | 2.698088000  | -1.782041000 | H  | -6.694781000 | 2.682100000  | -1.760856000 |
| H                                                                                                     | -5.954995000 | 3.211570000  | -4.062113000 | H  | -5.848885000 | 3.199517000  | -4.025104000 |
| H                                                                                                     | -4.587241000 | -0.840106000 | -4.512679000 | H  | -4.537377000 | -0.869592000 | -4.485554000 |
| H                                                                                                     | -4.869573000 | 1.449160000  | -5.426572000 | H  | -4.770654000 | 1.430406000  | -5.386374000 |
| Mn                                                                                                    | -4.144839000 | -1.515231000 | 0.822469000  | Mn | -4.182855000 | -1.588322000 | 0.847711000  |
| Br                                                                                                    | -3.321915000 | -3.278341000 | -0.724312000 | Br | -3.387420000 | -3.362809000 | -0.700930000 |
| Br                                                                                                    | -2.898869000 | 0.623801000  | 1.038629000  | Br | -2.903797000 | 0.529163000  | 1.084865000  |
| [MnBr <sub>2</sub> {O=PPh(BINOL)} <sub>2</sub> ] <sub>2</sub> (undecet state, r <sup>2</sup> SCAN-3c) |              |              |              |    |              |              |              |
| H                                                                                                     | -2.660861000 | -0.646631000 | -0.929510000 |    |              |              |              |
| C                                                                                                     | -2.824080000 | 0.243004000  | -1.529937000 |    |              |              |              |
| H                                                                                                     | -2.011967000 | -0.570407000 | -3.323231000 |    |              |              |              |
| C                                                                                                     | -2.468295000 | 0.296417000  | -2.852797000 |    |              |              |              |
| C                                                                                                     | -3.705313000 | 2.530928000  | -1.629379000 |    |              |              |              |
| C                                                                                                     | -2.653027000 | 1.482259000  | -3.602596000 |    |              |              |              |
| C                                                                                                     | -3.421954000 | 1.367305000  | -0.944633000 |    |              |              |              |
| C                                                                                                     | -3.254636000 | 2.625110000  | -2.984875000 |    |              |              |              |
| C                                                                                                     | -2.226388000 | 1.568102000  | -4.950228000 |    |              |              |              |
| H                                                                                                     | -3.751246000 | 4.715069000  | -3.262188000 |    |              |              |              |
| C                                                                                                     | -2.349460000 | 2.740910000  | -5.653754000 |    |              |              |              |
| H                                                                                                     | -1.780534000 | 0.689313000  | -5.408749000 |    |              |              |              |
| H                                                                                                     | -2.010690000 | 2.798566000  | -6.684322000 |    |              |              |              |
| C                                                                                                     | -2.898030000 | 3.881317000  | -5.030466000 |    |              |              |              |
| H                                                                                                     | -2.963734000 | 4.815559000  | -5.581232000 |    |              |              |              |
| C                                                                                                     | -3.342090000 | 3.825866000  | -3.730772000 |    |              |              |              |
| C                                                                                                     | -3.970659000 | 4.136835000  | 0.240689000  |    |              |              |              |
| C                                                                                                     | -4.433179000 | 3.629421000  | -0.956779000 |    |              |              |              |
| C                                                                                                     | -5.693542000 | 5.788128000  | 0.378205000  |    |              |              |              |
| C                                                                                                     | -5.653402000 | 4.168911000  | -1.476854000 |    |              |              |              |
| C                                                                                                     | -4.569723000 | 5.213651000  | 0.912825000  |    |              |              |              |
| C                                                                                                     | -6.271107000 | 5.274512000  | -0.807956000 |    |              |              |              |
| C                                                                                                     | -6.306082000 | 3.617910000  | -2.607626000 |    |              |              |              |
| H                                                                                                     | -4.128754000 | 5.566094000  | 1.839991000  |    |              |              |              |
| H                                                                                                     | -7.921493000 | 6.665310000  | -0.818484000 |    |              |              |              |
| H                                                                                                     | -6.168474000 | 6.629350000  | 0.875812000  |    |              |              |              |
| C                                                                                                     | -7.478819000 | 4.159409000  | -3.078018000 |    |              |              |              |
| H                                                                                                     | -5.878719000 | 2.750570000  | -3.099471000 |    |              |              |              |
| H                                                                                                     | -7.966625000 | 3.716204000  | -3.941532000 |    |              |              |              |
| C                                                                                                     | -8.060690000 | 5.278710000  | -2.446194000 |    |              |              |              |
| H                                                                                                     | -8.983356000 | 5.699727000  | -2.834965000 |    |              |              |              |
| C                                                                                                     | -7.470474000 | 5.818581000  | -1.329916000 |    |              |              |              |
| O                                                                                                     | -3.789034000 | 1.261995000  | 0.411045000  |    |              |              |              |
| O                                                                                                     | -2.821255000 | 3.583842000  | 0.821358000  |    |              |              |              |
| P                                                                                                     | -2.947648000 | 2.113049000  | 1.487474000  |    |              |              |              |
| O                                                                                                     | -1.547916000 | 1.658066000  | 1.756676000  |    |              |              |              |
| C                                                                                                     | -4.023442000 | 2.167909000  | 2.903616000  |    |              |              |              |
| C                                                                                                     | -5.650237000 | 2.430392000  | 5.135163000  |    |              |              |              |
| C                                                                                                     | -3.444724000 | 2.302364000  | 4.171722000  |    |              |              |              |
| C                                                                                                     | -5.416046000 | 2.162254000  | 2.749710000  |    |              |              |              |
| C                                                                                                     | -6.223686000 | 2.293081000  | 3.872785000  |    |              |              |              |
| C                                                                                                     | -4.265758000 | 2.431034000  | 5.285236000  |    |              |              |              |
| H                                                                                                     | -2.363539000 | 2.311069000  | 4.287273000  |    |              |              |              |
| H                                                                                                     | -5.862078000 | 2.054487000  | 1.765733000  |    |              |              |              |
| H                                                                                                     | -7.304022000 | 2.284437000  | 3.762803000  |    |              |              |              |
| H                                                                                                     | -3.823951000 | 2.524454000  | 6.272623000  |    |              |              |              |
| H                                                                                                     | -6.287139000 | 2.529499000  | 6.009510000  |    |              |              |              |
| Mn                                                                                                    | -0.289850000 | 0.426183000  | 2.883043000  |    |              |              |              |
| Br                                                                                                    | 1.863148000  | -0.370422000 | 1.695563000  |    |              |              |              |
| Br                                                                                                    | 0.733902000  | 2.414877000  | 4.195468000  |    |              |              |              |
| Mn                                                                                                    | 0.337390000  | -1.877939000 | -0.186031000 |    |              |              |              |
| Br                                                                                                    | -1.512345000 | -1.747682000 | 1.626262000  |    |              |              |              |
| Br                                                                                                    | -1.087492000 | -3.231485000 | -1.884554000 |    |              |              |              |
| H                                                                                                     | -4.066570000 | -2.471074000 | 4.995877000  |    |              |              |              |
| C                                                                                                     | -4.461737000 | -1.786083000 | 5.739226000  |    |              |              |              |
| H                                                                                                     | -6.486535000 | -1.873932000 | 5.066836000  |    |              |              |              |
| C                                                                                                     | -5.789773000 | -1.449416000 | 5.784583000  |    |              |              |              |

|   |              |              |              |
|---|--------------|--------------|--------------|
| C | -3.987869000 | -0.357179000 | 7.677786000  |
| C | -6.268168000 | -0.525822000 | 6.744716000  |
| C | -3.590077000 | -1.231111000 | 6.687675000  |
| C | -5.359301000 | 0.052765000  | 7.687566000  |
| C | -7.628889000 | -0.132968000 | 6.761849000  |
| H | -5.162826000 | 1.543557000  | 9.247946000  |
| C | -8.076528000 | 0.816513000  | 7.647317000  |
| H | -8.308789000 | -0.588692000 | 6.046280000  |
| H | -9.120848000 | 1.115065000  | 7.648776000  |
| C | -7.171224000 | 1.425345000  | 8.542013000  |
| H | -7.522135000 | 2.200592000  | 9.217250000  |
| C | -5.846951000 | 1.055687000  | 8.561624000  |
| C | -1.842595000 | 0.771420000  | 8.178667000  |
| C | -2.995889000 | 0.168698000  | 8.641151000  |
| C | -1.076336000 | 1.328720000  | 10.372474000 |
| C | -3.157078000 | 0.049173000  | 10.058335000 |
| C | -0.887333000 | 1.368103000  | 9.015491000  |
| C | -2.191744000 | 0.654734000  | 10.925956000 |
| C | -4.213175000 | -0.694224000 | 10.641528000 |
| H | -0.019284000 | 1.842427000  | 8.568372000  |
| H | -1.620995000 | 1.018547000  | 12.975203000 |
| H | -0.353828000 | 1.790638000  | 11.039893000 |
| C | -4.332368000 | -0.796459000 | 12.007183000 |
| H | -4.928224000 | -1.196651000 | 9.998375000  |
| H | -5.144703000 | -1.378303000 | 12.433368000 |
| C | -3.406257000 | -0.161016000 | 12.861269000 |
| H | -3.518991000 | -0.245255000 | 13.938242000 |
| C | -2.354978000 | 0.544008000  | 12.328687000 |
| O | -2.246146000 | -1.636988000 | 6.632514000  |
| O | -1.593837000 | 0.814114000  | 6.796700000  |
| P | -1.150564000 | -0.580957000 | 6.100918000  |
| O | -1.145246000 | -0.392758000 | 4.618217000  |
| C | 0.367473000  | -1.183621000 | 6.812124000  |
| C | 2.769115000  | -2.017805000 | 7.928479000  |
| C | 1.562449000  | -0.996855000 | 6.108625000  |
| C | 0.372301000  | -1.788669000 | 8.076309000  |
| C | 1.578110000  | -2.203014000 | 8.628320000  |
| C | 2.761242000  | -1.417898000 | 6.671425000  |
| H | 1.560096000  | -0.524281000 | 5.130769000  |
| H | -0.555057000 | -1.940670000 | 8.620221000  |
| H | 1.586492000  | -2.675362000 | 9.605913000  |
| H | 3.688599000  | -1.278768000 | 6.124377000  |
| H | 3.708219000  | -2.346735000 | 8.364441000  |
| H | -0.334921000 | -2.015787000 | -4.769935000 |
| C | 0.588398000  | -1.795038000 | -5.296489000 |
| H | 0.579484000  | -3.552683000 | -6.508018000 |
| C | 1.102255000  | -2.636099000 | -6.248165000 |
| C | 2.456833000  | -0.230851000 | -5.602265000 |
| C | 2.331522000  | -2.341691000 | -6.883719000 |
| C | 1.278027000  | -0.611943000 | -4.992581000 |
| C | 3.039314000  | -1.145628000 | -6.540734000 |
| C | 2.890347000  | -3.232608000 | -7.831908000 |
| H | 4.877060000  | -0.045953000 | -6.860994000 |
| C | 4.114586000  | -2.981916000 | -8.399598000 |
| H | 2.334906000  | -4.131460000 | -8.087376000 |
| H | 4.539386000  | -3.677837000 | -9.117169000 |
| C | 4.834983000  | -1.826983000 | -8.030216000 |
| H | 5.816343000  | -1.644049000 | -8.458979000 |
| C | 4.310278000  | -0.930485000 | -7.129509000 |
| C | 3.314272000  | 1.413018000  | -3.953466000 |
| C | 3.075973000  | 1.071185000  | -5.270427000 |
| C | 4.356789000  | 3.487019000  | -4.519028000 |
| C | 3.406649000  | 2.041043000  | -6.271617000 |
| C | 3.954007000  | 2.596687000  | -3.559488000 |
| C | 4.079403000  | 3.245259000  | -5.885726000 |
| C | 3.042695000  | 1.883689000  | -7.632420000 |
| H | 4.122319000  | 2.774961000  | -2.502268000 |
| H | 4.946529000  | 5.098677000  | -6.570777000 |
| H | 4.869302000  | 4.403051000  | -4.237620000 |
| C | 3.374026000  | 2.835802000  | -8.567027000 |
| H | 2.484949000  | 1.004032000  | -7.935436000 |

|   |              |              |              |
|---|--------------|--------------|--------------|
| H | 3.077343000  | 2.697420000  | -9.602852000 |
| C | 4.086706000  | 3.994871000  | -8.193654000 |
| H | 4.349871000  | 4.733325000  | -8.945423000 |
| C | 4.423355000  | 4.196420000  | -6.877769000 |
| O | 0.662843000  | 0.249087000  | -4.073607000 |
| O | 2.909202000  | 0.541938000  | -2.928176000 |
| P | 1.315535000  | 0.516005000  | -2.627317000 |
| O | 1.079106000  | -0.529317000 | -1.589018000 |
| C | 0.723578000  | 2.142079000  | -2.210951000 |
| C | -0.089907000 | 4.691106000  | -1.479282000 |
| C | 0.554873000  | 2.454479000  | -0.857932000 |
| C | 0.486924000  | 3.103544000  | -3.201889000 |
| C | 0.077263000  | 4.376666000  | -2.827155000 |
| C | 0.149294000  | 3.733464000  | -0.496968000 |
| H | 0.736320000  | 1.701918000  | -0.095795000 |
| H | 0.608131000  | 2.857084000  | -4.251853000 |
| H | -0.119644000 | 5.122514000  | -3.591007000 |
| H | 0.009982000  | 3.973710000  | 0.551957000  |
| H | -0.414624000 | 5.687968000  | -1.193756000 |
| H | 5.113846000  | -2.141502000 | 0.993251000  |
| C | 5.343498000  | -1.864521000 | -0.030552000 |
| H | 6.315656000  | -0.025346000 | 0.451822000  |
| C | 6.000548000  | -0.701600000 | -0.338254000 |
| C | 5.204942000  | -2.471762000 | -2.406808000 |
| C | 6.258778000  | -0.354876000 | -1.685626000 |
| C | 4.960650000  | -2.722798000 | -1.071140000 |
| C | 5.836470000  | -1.229905000 | -2.737669000 |
| C | 6.915306000  | 0.856828000  | -2.013665000 |
| H | 5.665604000  | -1.434199000 | -4.884501000 |
| C | 7.125823000  | 1.211323000  | -3.323187000 |
| H | 7.239771000  | 1.505881000  | -1.204000000 |
| H | 7.625093000  | 2.145341000  | -3.564400000 |
| C | 6.662569000  | 0.375979000  | -4.360158000 |
| H | 6.792788000  | 0.682691000  | -5.394674000 |
| C | 6.029908000  | -0.810347000 | -4.075941000 |
| C | 3.472615000  | -3.904610000 | -3.442421000 |
| C | 4.777756000  | -3.452292000 | -3.431145000 |
| C | 3.805539000  | -5.304368000 | -5.347100000 |
| C | 5.676382000  | -4.015728000 | -4.394067000 |
| C | 2.967321000  | -4.815883000 | -4.380608000 |
| C | 5.169429000  | -4.929733000 | -5.373324000 |
| C | 7.067812000  | -3.745613000 | -4.386833000 |
| H | 1.923419000  | -5.106656000 | -4.320178000 |
| H | 5.645896000  | -6.141469000 | -7.093194000 |
| H | 3.434938000  | -5.999494000 | -6.095273000 |
| C | 7.898911000  | -4.296399000 | -5.333177000 |
| H | 7.479940000  | -3.100176000 | -3.618519000 |
| H | 8.962734000  | -4.078151000 | -5.305808000 |
| C | 7.386371000  | -5.149092000 | -6.333906000 |
| H | 8.054141000  | -5.567557000 | -7.081422000 |
| C | 6.050462000  | -5.465525000 | -6.343927000 |
| O | 4.328367000  | -3.924101000 | -0.698674000 |
| O | 2.575774000  | -3.437196000 | -2.467664000 |
| P | 2.748703000  | -4.060455000 | -0.984282000 |
| O | 1.863009000  | -3.306701000 | -0.040166000 |
| C | 2.479037000  | -5.819552000 | -1.000558000 |
| C | 1.941382000  | -8.538497000 | -1.118101000 |
| C | 1.220650000  | -6.294139000 | -0.612421000 |
| C | 3.469766000  | -6.701946000 | -1.449953000 |
| C | 3.193323000  | -8.062639000 | -1.504229000 |
| C | 0.957939000  | -7.657477000 | -0.673387000 |
| H | 0.458125000  | -5.599994000 | -0.271069000 |
| H | 4.445512000  | -6.331239000 | -1.748871000 |
| H | 3.958044000  | -8.753041000 | -1.846877000 |
| H | -0.015162000 | -8.031604000 | -0.370221000 |
| H | 1.732311000  | -9.603684000 | -1.161794000 |
