# Supplementary material for: Luminescent Behavior of Zn(II) and Mn(II) Halide Derivatives of 4-Phenyldinaphtho[2,1-d:1′,2′-f][1,3,2]dioxaphosphepine 4-Oxide and Single-Crystal X-ray Structure Determination of the Ligand
Source: Molecules. 2024 Jan 1;29(1):239. doi: 10.3390/molecules29010239 (PMC10780406; doi:10.3390/molecules29010239)
Supplement: Supplementary file 1 [file molecules-29-00239-s001.zip › 32083803_0m_def.cif]

 
data_32083803_0m_a
 
_audit_creation_method            'SHELXL-2018/3'
_shelx_SHELXL_version_number      '2018/3'
_chemical_name_systematic         ?
_chemical_name_common             ?
_chemical_melting_point           ?
_chemical_formula_moiety          
 'C26 H17 O3 P' 

_chemical_formula_sum
 'C26 H17 O3 P' 
_chemical_formula_weight          408.36

loop_
 _atom_type_symbol
 _atom_type_description
 _atom_type_scat_dispersion_real
 _atom_type_scat_dispersion_imag
 _atom_type_scat_source
 'C'  'C'   0.0033   0.0016
 'International Tables Vol C Tables 4.2.6.8 and 6.1.1.4'
 'H'  'H'   0.0000   0.0000
 'International Tables Vol C Tables 4.2.6.8 and 6.1.1.4'
 'O'  'O'   0.0106   0.0060
 'International Tables Vol C Tables 4.2.6.8 and 6.1.1.4'
 'P'  'P'   0.1023   0.0942
 'International Tables Vol C Tables 4.2.6.8 and 6.1.1.4'
 
_space_group_crystal_system       orthorhombic
_space_group_IT_number            19
_space_group_name_H-M_alt         'P 21 21 21'
_space_group_name_Hall            'P 2ac 2ab'
 
_shelx_space_group_comment
;
The symmetry employed for this shelxl refinement is uniquely defined
by the following loop, which should always be used as a source of
symmetry information in preference to the above space-group names.
They are only intended as comments.
;
 
loop_
 _space_group_symop_operation_xyz
 'x, y, z'
 '-x+1/2, -y, z+1/2'
 '-x, y+1/2, -z+1/2'
 'x+1/2, -y+1/2, -z'
 
_cell_length_a                    10.1725(3)
_cell_length_b                    10.5825(3)
_cell_length_c                    18.4246(5)
_cell_angle_alpha                 90
_cell_angle_beta                  90
_cell_angle_gamma                 90
_cell_volume                      1983.42(10)
_cell_formula_units_Z             4
_cell_measurement_temperature     100(2)
_cell_measurement_reflns_used      9811
_cell_measurement_theta_min        2.78
_cell_measurement_theta_max       28.28

_exptl_crystal_description       'prism'
_exptl_crystal_colour            'colourless'
_exptl_crystal_density_meas       ?
_exptl_crystal_density_method     ?
_exptl_crystal_density_diffrn     1.368          
_exptl_crystal_F_000              848
_exptl_transmission_factor_min    ?
_exptl_transmission_factor_max    ?
_exptl_crystal_size_max           0.208
_exptl_crystal_size_mid           0.177
_exptl_crystal_size_min           0.148
_exptl_absorpt_coefficient_mu     0.165
_shelx_estimated_absorpt_T_min    0.967
_shelx_estimated_absorpt_T_max    0.976
_exptl_absorpt_correction_type   'multi-scan'
_exptl_absorpt_correction_T_min   0.6981         
_exptl_absorpt_correction_T_max   0.7457
_exptl_absorpt_process_details    'SADABS-2016/2 (Bruker AXS Inc.)' 
_exptl_absorpt_special_details    ?
_diffrn_ambient_temperature       100(2)
_diffrn_radiation_wavelength      0.71073
_diffrn_radiation_type           'MoK\a'
_diffrn_radiation_source         'Incoatec high brillance I\muS microsource'
_diffrn_radiation_monochromator  'Incoatec HeliosTM multilayer optics'
_diffrn_measurement_device_type  'Bruker D8 Venture Photon II CMOS'
_diffrn_measurement_method       '\f and \w scans'
_diffrn_detector_area_resol_mean  ?
_diffrn_reflns_number             31587
_diffrn_reflns_av_unetI/netI      0.0134
_diffrn_reflns_av_R_equivalents   0.0204
_diffrn_reflns_limit_h_min        -13
_diffrn_reflns_limit_h_max        13
_diffrn_reflns_limit_k_min        -14
_diffrn_reflns_limit_k_max        14
_diffrn_reflns_limit_l_min        -24
_diffrn_reflns_limit_l_max        24
_diffrn_reflns_theta_min          2.211
_diffrn_reflns_theta_max          28.315
_diffrn_reflns_theta_full         25.242
_diffrn_measured_fraction_theta_max   0.999
_diffrn_measured_fraction_theta_full  0.999
_diffrn_reflns_Laue_measured_fraction_max    0.999
_diffrn_reflns_Laue_measured_fraction_full   0.999
_diffrn_reflns_point_group_measured_fraction_max   0.999
_diffrn_reflns_point_group_measured_fraction_full  0.999
_reflns_number_total              4932
_reflns_number_gt                 4866
_reflns_threshold_expression      'I > 2\s(I)'
_reflns_Friedel_coverage          0.764
_reflns_Friedel_fraction_max      0.999
_reflns_Friedel_fraction_full     0.999
 
_reflns_special_details
;
 Reflections were merged by SHELXL according to the crystal
 class for the calculation of statistics and refinement.
 
 _reflns_Friedel_fraction is defined as the number of unique
 Friedel pairs measured divided by the number that would be
 possible theoretically, ignoring centric projections and
 systematic absences.
;
 
_computing_data_collection      'Bruker APEX3'
_computing_cell_refinement      'Bruker SAINT'
_computing_data_reduction       'Bruker SAINT'  
_computing_structure_solution   'SHELXT 2018/2 (Sheldrick, 2018)'
_computing_structure_refinement 'SHELXL-2018/3 (Sheldrick, 2018)'
_computing_molecular_graphics     ?
_computing_publication_material   ?
_refine_special_details           ?
_refine_ls_structure_factor_coef  Fsqd
_refine_ls_matrix_type            full
_refine_ls_weighting_scheme       calc
_refine_ls_weighting_details
'w=1/[\s^2^(Fo^2^)+(0.0382P)^2^+0.5090P] where P=(Fo^2^+2Fc^2^)/3'
_atom_sites_solution_primary      dual
_atom_sites_solution_secondary    ?
_atom_sites_solution_hydrogens    geom
_refine_ls_hydrogen_treatment     constr
_refine_ls_extinction_method      none
_refine_ls_extinction_coef        .
_refine_ls_abs_structure_details
;
 Flack x determined using 2083 quotients [(I+)-(I-)]/[(I+)+(I-)]
 (Parsons, Flack and Wagner, Acta Cryst. B69 (2013) 249-259;
  doi:10.1107/S2052519213010014)
;
_refine_ls_abs_structure_Flack    -0.004(14)
_chemical_absolute_configuration  ad
_refine_ls_number_reflns          4932
_refine_ls_number_parameters      271
_refine_ls_number_restraints      0
_refine_ls_R_factor_all           0.0277
_refine_ls_R_factor_gt            0.0273
_refine_ls_wR_factor_ref          0.0734
_refine_ls_wR_factor_gt           0.0731
_refine_ls_goodness_of_fit_ref    1.091
_refine_ls_restrained_S_all       1.091
_refine_ls_shift/su_max           0.001
_refine_ls_shift/su_mean          0.000
 
loop_
 _atom_site_label
 _atom_site_type_symbol
 _atom_site_fract_x
 _atom_site_fract_y
 _atom_site_fract_z
 _atom_site_U_iso_or_equiv
 _atom_site_adp_type
 _atom_site_occupancy
 _atom_site_site_symmetry_order  
 _atom_site_calc_flag
 _atom_site_refinement_flags_posn
 _atom_site_refinement_flags_adp
 _atom_site_refinement_flags_occupancy
 _atom_site_disorder_assembly
 _atom_site_disorder_group
P1 P 0.38281(4) 0.50542(4) 0.53744(2) 0.01782(10) Uani 1 1 d . . . . .
O2 O 0.35779(12) 0.57539(11) 0.46153(6) 0.0187(2) Uani 1 1 d . . . . .
O1 O 0.30240(13) 0.54525(13) 0.59909(7) 0.0257(3) Uani 1 1 d . . . . .
O3 O 0.35288(13) 0.36084(11) 0.51850(6) 0.0199(2) Uani 1 1 d . . . . .
C11 C 0.24122(16) 0.54799(15) 0.42359(9) 0.0176(3) Uani 1 1 d . . . . .
C12 C 0.22716(16) 0.43293(15) 0.38940(8) 0.0162(3) Uani 1 1 d . . . . .
C13 C 0.10181(16) 0.40613(15) 0.35698(8) 0.0171(3) Uani 1 1 d . . . . .
C14 C 0.06804(18) 0.28266(16) 0.33282(9) 0.0203(3) Uani 1 1 d . . . . .
H14 H 0.132290 0.217541 0.333926 0.024 Uiso 1 1 calc R U . . .
C15 C -0.05582(19) 0.25644(18) 0.30800(9) 0.0253(4) Uani 1 1 d . . . . .
H15 H -0.077593 0.172835 0.293566 0.030 Uiso 1 1 calc R U . . .
C16 C -0.15141(19) 0.35285(19) 0.30370(10) 0.0268(4) Uani 1 1 d . . . . .
H16 H -0.237126 0.333868 0.286373 0.032 Uiso 1 1 calc R U . . .
C17 C -0.12103(18) 0.47360(18) 0.32442(9) 0.0251(3) Uani 1 1 d . . . . .
H17 H -0.184781 0.538624 0.319446 0.030 Uiso 1 1 calc R U . . .
C18 C 0.00499(15) 0.50263(18) 0.35331(9) 0.0199(3) Uani 1 1 d . . . . .
C19 C 0.03232(18) 0.62372(17) 0.38339(10) 0.0234(3) Uani 1 1 d . . . . .
H19 H -0.029332 0.690416 0.377721 0.028 Uiso 1 1 calc R U . . .
C110 C 0.14661(18) 0.64455(16) 0.42032(10) 0.0223(3) Uani 1 1 d . . . . .
H110 H 0.161987 0.723339 0.443522 0.027 Uiso 1 1 calc R U . . .
C21 C 0.39996(16) 0.31048(15) 0.45292(9) 0.0187(3) Uani 1 1 d . . . . .
C22 C 0.33820(16) 0.34169(15) 0.38896(9) 0.0166(3) Uani 1 1 d . . . . .
C23 C 0.39030(16) 0.29009(14) 0.32270(9) 0.0171(3) Uani 1 1 d . . . . .
C24 C 0.34077(17) 0.32206(16) 0.25291(9) 0.0194(3) Uani 1 1 d . . . . .
H24 H 0.269664 0.379844 0.248974 0.023 Uiso 1 1 calc R U . . .
C25 C 0.39410(19) 0.27073(18) 0.19109(9) 0.0255(4) Uani 1 1 d . . . . .
H25 H 0.359326 0.292998 0.144982 0.031 Uiso 1 1 calc R U . . .
C26 C 0.5002(2) 0.1852(2) 0.19559(11) 0.0308(4) Uani 1 1 d . . . . .
H26 H 0.535852 0.149252 0.152638 0.037 Uiso 1 1 calc R U . . .
C27 C 0.55142(19) 0.15402(18) 0.26153(11) 0.0272(4) Uani 1 1 d . . . . .
H27 H 0.623109 0.096657 0.264015 0.033 Uiso 1 1 calc R U . . .
C28 C 0.49953(17) 0.20584(16) 0.32665(10) 0.0209(3) Uani 1 1 d . . . . .
C29 C 0.55674(18) 0.17690(17) 0.39470(11) 0.0250(4) Uani 1 1 d . . . . .
H29 H 0.629473 0.120728 0.396922 0.030 Uiso 1 1 calc R U . . .
C210 C 0.50866(18) 0.22873(17) 0.45722(10) 0.0237(3) Uani 1 1 d . . . . .
H210 H 0.547933 0.209890 0.502735 0.028 Uiso 1 1 calc R U . . .
C31 C 0.55498(16) 0.52436(15) 0.54957(9) 0.0184(3) Uani 1 1 d . . . . .
C32 C 0.60313(18) 0.53735(16) 0.62012(9) 0.0225(3) Uani 1 1 d . . . . .
H32 H 0.543891 0.539841 0.659959 0.027 Uiso 1 1 calc R U . . .
C33 C 0.7375(2) 0.54664(18) 0.63213(10) 0.0268(4) Uani 1 1 d . . . . .
H33 H 0.770210 0.554470 0.680214 0.032 Uiso 1 1 calc R U . . .
C34 C 0.82380(19) 0.54450(19) 0.57416(11) 0.0291(4) Uani 1 1 d . . . . .
H34 H 0.915626 0.552417 0.582389 0.035 Uiso 1 1 calc R U . . .
C35 C 0.7766(2) 0.5309(2) 0.50434(11) 0.0354(5) Uani 1 1 d . . . . .
H35 H 0.836455 0.528703 0.464766 0.043 Uiso 1 1 calc R U . . .
C36 C 0.64248(19) 0.5203(2) 0.49139(10) 0.0294(4) Uani 1 1 d . . . . .
H36 H 0.610652 0.510379 0.443252 0.035 Uiso 1 1 calc R U . . .
 
loop_
 _atom_site_aniso_label
 _atom_site_aniso_U_11
 _atom_site_aniso_U_22
 _atom_site_aniso_U_33
 _atom_site_aniso_U_23
 _atom_site_aniso_U_13
 _atom_site_aniso_U_12
P1 0.01957(18) 0.01791(18) 0.01599(18) -0.00214(15) 0.00348(14) -0.00408(16)
O2 0.0201(5) 0.0160(5) 0.0199(5) 0.0004(4) 0.0010(5) -0.0036(4)
O1 0.0256(6) 0.0296(7) 0.0221(6) -0.0064(5) 0.0078(5) -0.0059(5)
O3 0.0268(6) 0.0178(5) 0.0151(5) 0.0002(4) 0.0007(4) -0.0050(5)
C11 0.0179(7) 0.0167(7) 0.0183(7) 0.0007(6) 0.0038(6) -0.0020(6)
C12 0.0185(7) 0.0150(7) 0.0152(6) 0.0019(6) 0.0042(6) 0.0002(6)
C13 0.0194(7) 0.0174(7) 0.0144(6) 0.0015(5) 0.0033(6) -0.0009(6)
C14 0.0244(8) 0.0187(7) 0.0178(7) 0.0007(6) 0.0011(6) -0.0012(6)
C15 0.0301(9) 0.0245(8) 0.0213(8) 0.0006(7) -0.0012(7) -0.0073(7)
C16 0.0220(8) 0.0355(10) 0.0229(8) 0.0034(7) -0.0042(7) -0.0054(7)
C17 0.0212(8) 0.0306(9) 0.0233(7) 0.0035(7) -0.0013(7) 0.0025(7)
C18 0.0199(7) 0.0214(7) 0.0182(7) 0.0026(7) 0.0026(5) 0.0002(7)
C19 0.0224(8) 0.0194(8) 0.0283(8) 0.0014(7) 0.0025(7) 0.0039(6)
C110 0.0243(8) 0.0154(7) 0.0272(8) -0.0014(6) 0.0040(7) 0.0001(6)
C21 0.0234(8) 0.0151(6) 0.0176(7) -0.0011(6) 0.0000(6) -0.0023(6)
C22 0.0188(7) 0.0126(7) 0.0183(7) -0.0003(6) 0.0011(6) -0.0005(5)
C23 0.0184(7) 0.0144(7) 0.0185(7) -0.0015(5) 0.0014(6) -0.0003(6)
C24 0.0207(7) 0.0190(7) 0.0184(7) -0.0001(6) 0.0011(6) 0.0014(6)
C25 0.0272(9) 0.0304(9) 0.0189(7) -0.0030(7) 0.0019(7) 0.0006(8)
C26 0.0282(9) 0.0368(10) 0.0275(9) -0.0132(8) 0.0057(7) 0.0046(8)
C27 0.0231(8) 0.0249(9) 0.0338(10) -0.0095(8) 0.0023(7) 0.0063(7)
C28 0.0209(8) 0.0167(7) 0.0251(8) -0.0030(6) 0.0000(7) 0.0021(6)
C29 0.0231(8) 0.0188(8) 0.0330(9) -0.0015(7) -0.0059(7) 0.0049(6)
C210 0.0273(8) 0.0195(7) 0.0244(8) 0.0022(7) -0.0075(7) 0.0012(6)
C31 0.0201(7) 0.0161(7) 0.0189(7) -0.0018(6) 0.0016(6) -0.0020(6)
C32 0.0295(9) 0.0198(7) 0.0183(7) 0.0011(6) 0.0004(7) -0.0031(6)
C33 0.0310(9) 0.0253(8) 0.0242(8) 0.0004(7) -0.0065(7) -0.0004(7)
C34 0.0210(8) 0.0285(9) 0.0376(10) -0.0077(8) -0.0031(7) 0.0027(7)
C35 0.0235(9) 0.0527(14) 0.0301(9) -0.0127(9) 0.0079(7) -0.0030(9)
C36 0.0264(9) 0.0422(11) 0.0196(7) -0.0076(8) 0.0036(7) -0.0038(8)
 
_geom_special_details
;
 All esds (except the esd in the dihedral angle between two l.s. planes)
 are estimated using the full covariance matrix.  The cell esds are taken
 into account individually in the estimation of esds in distances, angles
 and torsion angles; correlations between esds in cell parameters are only
 used when they are defined by crystal symmetry.  An approximate (isotropic)
 treatment of cell esds is used for estimating esds involving l.s. planes.
;
 
loop_
 _geom_bond_atom_site_label_1
 _geom_bond_atom_site_label_2
 _geom_bond_distance
 _geom_bond_site_symmetry_2
 _geom_bond_publ_flag
P1 O1 1.4619(13) . ?
P1 O3 1.5985(12) . ?
P1 O2 1.6028(12) . ?
P1 C31 1.7770(17) . ?
O2 C11 1.407(2) . ?
O3 C21 1.4047(19) . ?
C11 C12 1.378(2) . ?
C11 C110 1.405(2) . ?
C12 C13 1.436(2) . ?
C12 C22 1.486(2) . ?
C13 C18 1.420(2) . ?
C13 C14 1.422(2) . ?
C14 C15 1.369(3) . ?
C15 C16 1.412(3) . ?
C16 C17 1.369(3) . ?
C17 C18 1.422(2) . ?
C18 C19 1.423(2) . ?
C19 C110 1.365(3) . ?
C21 C22 1.376(2) . ?
C21 C210 1.406(2) . ?
C22 C23 1.439(2) . ?
C23 C24 1.422(2) . ?
C23 C28 1.426(2) . ?
C24 C25 1.373(2) . ?
C25 C26 1.411(3) . ?
C26 C27 1.362(3) . ?
C27 C28 1.421(2) . ?
C28 C29 1.416(3) . ?
C29 C210 1.366(3) . ?
C31 C36 1.394(2) . ?
C31 C32 1.396(2) . ?
C32 C33 1.388(3) . ?
C33 C34 1.383(3) . ?
C34 C35 1.381(3) . ?
C35 C36 1.390(3) . ?
 
loop_
 _geom_angle_atom_site_label_1
 _geom_angle_atom_site_label_2
 _geom_angle_atom_site_label_3
 _geom_angle
 _geom_angle_site_symmetry_1
 _geom_angle_site_symmetry_3
 _geom_angle_publ_flag
O1 P1 O3 109.81(7) . . ?
O1 P1 O2 117.13(8) . . ?
O3 P1 O2 102.79(6) . . ?
O1 P1 C31 114.91(8) . . ?
O3 P1 C31 108.85(7) . . ?
O2 P1 C31 102.37(7) . . ?
C11 O2 P1 118.18(10) . . ?
C21 O3 P1 119.07(10) . . ?
C12 C11 C110 123.49(16) . . ?
C12 C11 O2 119.78(14) . . ?
C110 C11 O2 116.67(14) . . ?
C11 C12 C13 117.17(15) . . ?
C11 C12 C22 119.84(15) . . ?
C13 C12 C22 122.98(14) . . ?
C18 C13 C14 118.56(15) . . ?
C18 C13 C12 119.56(15) . . ?
C14 C13 C12 121.73(15) . . ?
C15 C14 C13 120.87(16) . . ?
C14 C15 C16 120.42(17) . . ?
C17 C16 C15 120.23(17) . . ?
C16 C17 C18 120.65(17) . . ?
C13 C18 C17 119.19(16) . . ?
C13 C18 C19 119.55(15) . . ?
C17 C18 C19 121.10(16) . . ?
C110 C19 C18 120.39(16) . . ?
C19 C110 C11 119.16(16) . . ?
C22 C21 O3 119.35(14) . . ?
C22 C21 C210 123.71(16) . . ?
O3 C21 C210 116.94(15) . . ?
C21 C22 C23 117.88(15) . . ?
C21 C22 C12 119.90(14) . . ?
C23 C22 C12 122.09(14) . . ?
C24 C23 C28 118.08(15) . . ?
C24 C23 C22 123.14(15) . . ?
C28 C23 C22 118.75(15) . . ?
C25 C24 C23 121.06(16) . . ?
C24 C25 C26 120.47(17) . . ?
C27 C26 C25 120.01(17) . . ?
C26 C27 C28 121.16(17) . . ?
C29 C28 C27 120.77(16) . . ?
C29 C28 C23 120.04(16) . . ?
C27 C28 C23 119.18(16) . . ?
C210 C29 C28 120.84(16) . . ?
C29 C210 C21 118.75(16) . . ?
C36 C31 C32 119.68(16) . . ?
C36 C31 P1 121.95(13) . . ?
C32 C31 P1 118.30(13) . . ?
C33 C32 C31 120.05(16) . . ?
C34 C33 C32 120.06(17) . . ?
C35 C34 C33 120.06(18) . . ?
C34 C35 C36 120.64(18) . . ?
C35 C36 C31 119.50(17) . . ?
 
_refine_diff_density_max    0.348
_refine_diff_density_min   -0.311
_refine_diff_density_rms    0.041

_shelx_res_file
;
TITL 32083803_0m_a.res in P2(1)2(1)2(1)
    32083803_0m_a.res
    created by SHELXL-2018/3 at 14:06:57 on 24-Feb-2022
REM Old TITL 32083803_0m in P2(1)2(1)2(1)
REM SHELXT solution in P2(1)2(1)2(1): R1 0.089, Rweak 0.024, Alpha 0.001
REM <I/s>   3.827 for   24 systematic absences,  Orientation as input
REM Flack x =  0.014 ( 0.013 ) from  1717 Parsons' quotients
REM Formula found by SHELXT:  C26 O3 P

CELL  0.71073  10.1725  10.5825  18.4246   90.000   90.000   90.000
ZERR    4   0.0003   0.0003   0.0005    0.000    0.000    0.000
LATT -1
SYMM 1/2-X, -Y, 1/2+Z
SYMM -X, 1/2+Y, 1/2-Z
SYMM 1/2+X, 1/2-Y, -Z
SFAC C H O P
UNIT 104 68  12 4

REM h k l   Fo^2   Fc^2    Error/esd  Fc/Fc(max)  Resolution(A)

OMIT 0 1 1 !    0.16  3533.27  23.54  0.343       9.18
OMIT 1 1 0 ! 1135.44  5408.30  16.93  0.424       7.33

TEMP -173.150
SIZE 0.148 0.177 0.208
L.S. 10
ACTA
BOND
LIST 4
FMAP 2
PLAN 5

WGHT    0.038200    0.509000
FVAR       0.56810
P1    4    0.382811    0.505421    0.537435    11.00000    0.01957    0.01791 =
         0.01599   -0.00214    0.00348   -0.00408
O2    3    0.357794    0.575387    0.461527    11.00000    0.02007    0.01596 =
         0.01995    0.00040    0.00095   -0.00361
O1    3    0.302398    0.545247    0.599087    11.00000    0.02558    0.02959 =
         0.02206   -0.00642    0.00779   -0.00594
O3    3    0.352880    0.360843    0.518499    11.00000    0.02676    0.01779 =
         0.01511    0.00015    0.00075   -0.00504
C11   1    0.241219    0.547987    0.423586    11.00000    0.01792    0.01666 =
         0.01830    0.00071    0.00381   -0.00203
C12   1    0.227157    0.432929    0.389396    11.00000    0.01855    0.01498 =
         0.01515    0.00193    0.00417    0.00018
C13   1    0.101811    0.406129    0.356978    11.00000    0.01944    0.01745 =
         0.01436    0.00146    0.00329   -0.00090
C14   1    0.068038    0.282660    0.332819    11.00000    0.02444    0.01866 =
         0.01784    0.00074    0.00112   -0.00115
AFIX  43
H14   2    0.132290    0.217541    0.333926    11.00000   -1.20000
AFIX   0
C15   1   -0.055824    0.256440    0.307996    11.00000    0.03005    0.02452 =
         0.02134    0.00056   -0.00115   -0.00731
AFIX  43
H15   2   -0.077593    0.172835    0.293566    11.00000   -1.20000
AFIX   0
C16   1   -0.151414    0.352847    0.303702    11.00000    0.02201    0.03553 =
         0.02285    0.00341   -0.00417   -0.00537
AFIX  43
H16   2   -0.237126    0.333868    0.286373    11.00000   -1.20000
AFIX   0
C17   1   -0.121031    0.473598    0.324422    11.00000    0.02123    0.03063 =
         0.02333    0.00353   -0.00134    0.00248
AFIX  43
H17   2   -0.184781    0.538624    0.319446    11.00000   -1.20000
AFIX   0
C18   1    0.004987    0.502632    0.353312    11.00000    0.01994    0.02140 =
         0.01822    0.00258    0.00259    0.00024
C19   1    0.032324    0.623715    0.383387    11.00000    0.02241    0.01943 =
         0.02825    0.00141    0.00251    0.00395
AFIX  43
H19   2   -0.029332    0.690416    0.377721    11.00000   -1.20000
AFIX   0
C110  1    0.146611    0.644545    0.420319    11.00000    0.02426    0.01543 =
         0.02722   -0.00140    0.00399    0.00008
AFIX  43
H110  2    0.161987    0.723339    0.443522    11.00000   -1.20000
AFIX   0
rem
C21   1    0.399958    0.310485    0.452923    11.00000    0.02339    0.01514 =
         0.01759   -0.00115   -0.00002   -0.00227
C22   1    0.338203    0.341691    0.388961    11.00000    0.01885    0.01262 =
         0.01827   -0.00026    0.00105   -0.00047
C23   1    0.390295    0.290085    0.322704    11.00000    0.01844    0.01444 =
         0.01850   -0.00149    0.00143   -0.00034
C24   1    0.340774    0.322056    0.252911    11.00000    0.02074    0.01900 =
         0.01843   -0.00014    0.00110    0.00140
AFIX  43
H24   2    0.269664    0.379844    0.248974    11.00000   -1.20000
AFIX   0
C25   1    0.394100    0.270730    0.191095    11.00000    0.02718    0.03043 =
         0.01886   -0.00304    0.00189    0.00059
AFIX  43
H25   2    0.359326    0.292998    0.144982    11.00000   -1.20000
AFIX   0
C26   1    0.500169    0.185159    0.195593    11.00000    0.02816    0.03680 =
         0.02755   -0.01318    0.00572    0.00463
AFIX  43
H26   2    0.535852    0.149252    0.152638    11.00000   -1.20000
AFIX   0
C27   1    0.551418    0.154024    0.261533    11.00000    0.02305    0.02488 =
         0.03378   -0.00947    0.00226    0.00626
AFIX  43
H27   2    0.623109    0.096657    0.264015    11.00000   -1.20000
AFIX   0
C28   1    0.499527    0.205845    0.326650    11.00000    0.02091    0.01674 =
         0.02512   -0.00296    0.00000    0.00212
C29   1    0.556736    0.176900    0.394702    11.00000    0.02308    0.01878 =
         0.03299   -0.00151   -0.00588    0.00489
AFIX  43
H29   2    0.629473    0.120728    0.396922    11.00000   -1.20000
AFIX   0
C210  1    0.508664    0.228728    0.457221    11.00000    0.02730    0.01949 =
         0.02443    0.00219   -0.00752    0.00125
AFIX  43
H210  2    0.547933    0.209890    0.502735    11.00000   -1.20000
AFIX   0
rem
C31   1    0.554983    0.524356    0.549567    11.00000    0.02008    0.01613 =
         0.01895   -0.00178    0.00161   -0.00202
C32   1    0.603131    0.537351    0.620125    11.00000    0.02951    0.01983 =
         0.01829    0.00108    0.00038   -0.00309
AFIX  43
H32   2    0.543891    0.539841    0.659959    11.00000   -1.20000
AFIX   0
C33   1    0.737511    0.546639    0.632127    11.00000    0.03096    0.02526 =
         0.02418    0.00042   -0.00646   -0.00045
AFIX  43
H33   2    0.770210    0.554470    0.680214    11.00000   -1.20000
AFIX   0
C34   1    0.823801    0.544501    0.574163    11.00000    0.02099    0.02855 =
         0.03763   -0.00771   -0.00306    0.00267
AFIX  43
H34   2    0.915626    0.552417    0.582389    11.00000   -1.20000
AFIX   0
C35   1    0.776638    0.530874    0.504343    11.00000    0.02354    0.05269 =
         0.03011   -0.01274    0.00794   -0.00300
AFIX  43
H35   2    0.836455    0.528703    0.464766    11.00000   -1.20000
AFIX   0
C36   1    0.642476    0.520298    0.491391    11.00000    0.02642    0.04217 =
         0.01956   -0.00757    0.00364   -0.00379
AFIX  43
H36   2    0.610652    0.510379    0.443252    11.00000   -1.20000
rem
AFIX   0
HKLF 4


REM  32083803_0m_a.res in P2(1)2(1)2(1)
REM wR2 = 0.0734, GooF = S = 1.091, Restrained GooF = 1.091 for all data
REM R1 = 0.0273 for 4866 Fo > 4sig(Fo) and 0.0277 for all 4932 data
REM 271 parameters refined using 0 restraints

END

WGHT      0.0382      0.5087

REM Highest difference peak  0.348,  deepest hole -0.311,  1-sigma level  0.041
Q1    1   0.4754  0.5107  0.5407  11.00000  0.05    0.35
Q2    1  -0.0550  0.4890  0.3424  11.00000  0.05    0.26
Q3    1   0.0563  0.4581  0.3502  11.00000  0.05    0.25
Q4    1   0.3641  0.3033  0.2885  11.00000  0.05    0.25
Q5    1   0.2810  0.3896  0.3895  11.00000  0.05    0.24
;
_shelx_res_checksum   44977

_shelx_hkl_file
;
  -1   0   0    0.10    0.10
  -2   0   0  611.04    9.60
  -2   0   0  627.04    9.60
   2   0   0  612.04    9.60
   2   0   0  620.34    9.60
  -3   0   0    0.00    0.20
   3   0   0    0.40    0.20
  -3   0   0    0.10    0.10
   3   0   0    0.30    0.20
  -4   0   0 2016.20   30.70
   4   0   0 2034.00   30.70
   5   0   0    0.30    0.40
  -5   0   0    0.80    0.40
  -5   0   0    0.60    0.40
   5   0   0    0.70    0.40
   6   0   0   77.99    2.60
   6   0   0   74.99    2.50
  -6   0   0   76.09    2.70
  -6   0   0   81.09    2.60
  -7   0   0    0.70    0.50
   7   0   0    1.20    0.50
   7   0   0    1.20    0.40
  -7   0   0    0.60    0.40
   8   0   0 1000.80   17.10
  -8   0   0 1003.10   17.60
   8   0   0  985.10   17.40
  -8   0   0 1016.00   17.30
  -9   0   0    0.80    0.50
  -9   0   0    0.70    0.60
   9   0   0    0.70    0.50
   9   0   0   -0.20    0.40
 -10   0   0   14.90    1.80
  10   0   0   14.40    2.10
 -10   0   0   11.10    1.90
 -11   0   0    2.70    0.80
 -11   0   0    3.40    0.90
 -11   0   0    2.80    0.80
 -12   0   0    5.90    1.20
 -12   0   0    5.60    1.20
 -12   0   0    5.30    1.30
 -13   0   0    2.10    1.10
 -13   0   0    2.10    1.10
 -13   0   0    1.40    0.90
   0   1   0    0.70    0.20
   0   1   0    0.00    0.10
   0  -1   0    0.10    0.10
   1  -1   0  362.06    5.80
   2  -1   0 2405.26   74.09
  -2   1   0 2352.86   74.49
  -2  -1   0 2528.25   74.79
   2   1   0 2532.15   76.09
  -3   1   0  611.04   10.00
   3   1   0  613.94    9.90
   3   1   0  595.84    9.90
   3  -1   0  615.64    9.70
  -3   1   0  622.84    9.80
  -3  -1   0  591.44    9.90
   3  -1   0  619.84   10.00
  -3  -1   0  608.34    9.90
   4  -1   0  258.17    5.10
  -4   1   0  263.37    5.00
   4   1   0  261.97    5.10
  -4   1   0  260.27    5.20
   4  -1   0  251.97    4.90
   4   1   0  255.97    5.10
  -4  -1   0  255.57    5.10
  -5  -1   0  162.48    3.90
   5  -1   0  157.08    3.60
  -5   1   0  162.88    3.80
   5   1   0  163.58    3.90
  -5  -1   0  157.78    3.80
   5   1   0  152.58    3.70
  -6  -1   0  664.93   12.10
  -6   1   0  671.73   12.20
   6   1   0  687.33   12.00
   6  -1   0  680.43   12.10
   6   1   0  686.23   11.90
  -6  -1   0  693.63   12.00
  -6   1   0  685.33   11.90
   6  -1   0  692.83   11.70
  -7   1   0   44.70    2.00
   7  -1   0   45.90    1.90
  -7   1   0   46.60    2.20
   7   1   0   46.80    2.10
   7  -1   0   43.10    2.10
  -7  -1   0   46.00    2.10
   7   1   0   50.39    2.20
  -7  -1   0   47.10    2.20
  -8   1   0   44.30    2.40
   8   1   0   44.40    2.20
  -8  -1   0   47.50    2.30
   8   1   0   42.10    2.10
  -8  -1   0   47.30    2.40
   8  -1   0   44.10    2.20
   8  -1   0   44.60    2.10
  -8   1   0   47.30    2.20
  -8   1   0   47.40    2.20
  -9  -1   0   81.49    3.20
   9   1   0   85.79    3.20
  -9   1   0   83.39    3.40
   9   1   0   82.49    3.30
  -9  -1   0   79.79    3.30
  -9   1   0   85.09    3.20
   9  -1   0   81.29    3.30
  -9   1   0   82.29    3.20
 -10  -1   0    3.40    0.80
 -10   1   0    5.10    1.10
 -10  -1   0    3.90    1.20
 -10   1   0    4.90    1.10
  10  -1   0    3.80    0.80
 -10  -1   0    3.90    1.00
 -10   1   0    4.40    1.00
 -11   1   0   80.99    3.40
 -11   1   0   68.89    3.30
 -11   1   0   75.29    3.70
 -11  -1   0   79.99    3.70
 -11  -1   0   82.79    3.60
 -11  -1   0   76.69    3.10
 -12  -1   0    2.60    0.90
 -12  -1   0    2.00    0.80
 -12   1   0    2.20    0.90
 -12   1   0    2.10    1.00
 -12  -1   0    0.20    0.60
 -12  -1   0    2.80    1.10
 -12   1   0    1.20    0.80
 -13   1   0    2.10    1.10
 -13   1   0    1.10    0.80
 -13  -1   0    0.10    0.70
 -13  -1   0    1.30    1.10
 -13   1   0    0.80    0.80
 -13  -1   0    0.90    0.80
   0   2   0 2137.39   53.89
   0  -2   0 2305.47   55.29
  -1   2   0  714.63   10.70
   1  -2   0  715.43   11.00
  -1   2   0  712.93   11.20
   1  -2   0  694.63   10.70
   1   2   0  723.03   10.80
   1   2   0  701.63   11.00
  -1   2   0  708.63   10.70
   1  -2   0  716.83   11.20
  -1  -2   0  715.33   10.90
  -1  -2   0  703.33   11.00
  -1   2   0  730.53   11.00
   2  -2   0 5523.95  127.89
   2   2   0 5272.67  128.19
   3   2   0  803.62   12.60
   3  -2   0  774.02   12.10
   3   2   0  770.82   12.20
  -3   2   0  782.42   12.60
  -3  -2   0  762.32   12.40
  -3   2   0  773.82   12.60
   3  -2   0  771.82   12.50
   3   2   0  786.62   12.40
  -3   2   0  769.72   12.20
  -3  -2   0  787.12   12.20
  -4   2   0  111.39    2.90
  -4  -2   0  106.59    2.80
   4   2   0  106.99    2.80
  -4   2   0  104.49    2.90
  -4  -2   0  105.89    2.50
   4  -2   0  105.99    2.80
   4  -2   0  102.59    2.50
  -4   2   0  106.79    2.60
   4   2   0  103.49    2.80
  -4  -2   0  105.29    2.80
  -5  -2   0    0.00    0.30
  -5  -2   0    0.50    0.40
  -5  -2   0    0.40    0.30
   5  -2   0    0.50    0.40
   5  -2   0    0.10    0.20
   5   2   0    0.20    0.30
  -5   2   0    0.10    0.30
  -5   2   0    0.70    0.40
   5   2   0    0.40    0.40
  -5   2   0    0.70    0.40
  -6  -2   0  111.39    3.30
   6  -2   0  114.39    3.30
   6   2   0  112.39    3.30
  -6   2   0  111.09    3.10
  -6  -2   0  110.39    3.30
  -6   2   0  104.19    3.30
  -6   2   0  111.99    3.40
  -6  -2   0  111.59    2.90
   6   2   0  108.29    3.20
   6  -2   0  115.29    3.00
  -7  -2   0   84.29    3.00
  -7   2   0   88.59    3.00
   7  -2   0   86.59    2.70
   7   2   0   83.69    3.00
  -7   2   0   85.69    2.90
  -7   2   0   85.09    3.10
  -7  -2   0   80.99    3.00
   7   2   0   88.29    3.00
  -8   2   0  279.37    6.50
   8  -2   0  290.77    6.30
  -8  -2   0  296.07    6.20
   8  -2   0  295.87    6.80
  -8   2   0  281.57    6.60
  -8  -2   0  285.27    6.80
  -8  -2   0  284.87    6.80
   8   2   0  284.77    6.70
   8   2   0  288.07    6.70
  -8   2   0  291.67    7.00
   9  -2   0   44.90    2.40
  -9   2   0   45.20    2.30
  -9  -2   0   42.60    2.40
   9   2   0   45.20    2.40
  -9   2   0   42.10    2.50
  -9  -2   0   43.20    2.00
  -9  -2   0   46.30    2.50
   9   2   0   44.30    2.30
  -9   2   0   46.50    2.40
 -10  -2   0    8.00    1.40
 -10  -2   0    8.90    1.20
 -10   2   0    5.70    1.10
  10  -2   0    9.70    1.30
 -10   2   0    8.90    1.30
 -10   2   0    9.80    1.60
 -10  -2   0    7.10    1.10
 -11  -2   0    2.70    0.80
 -11  -2   0    4.00    1.10
 -11  -2   0    6.00    1.30
 -11   2   0    4.40    1.00
 -11   2   0    3.90    1.00
 -11   2   0    4.80    1.20
 -12   2   0  136.89    4.90
 -12  -2   0  124.99    5.00
 -12  -2   0  117.89    4.00
 -12   2   0  129.09    5.20
 -12   2   0  127.59    5.20
 -13   2   0    0.20    0.70
 -13  -2   0   -0.30    0.90
 -13   2   0   -0.80    0.60
   0   3   0    0.20    0.10
   0  -3   0    0.50    0.20
   0   3   0    0.20    0.20
   0   3   0    0.30    0.20
   0  -3   0    0.10    0.20
   0  -3   0    0.10    0.20
   1  -3   0 3507.75   87.69
   1   3   0 3473.55   90.69
   1   3   0 3213.98   83.49
  -1   3   0 3372.26   89.99
  -2  -3   0  787.52   12.30
   2  -3   0  781.62   12.40
   2   3   0  788.22   12.20
   2  -3   0  763.92   12.00
  -2   3   0  780.12   12.70
  -2  -3   0  783.82   12.20
  -2   3   0  799.72   12.50
   2  -3   0  775.62   12.00
   2   3   0  765.52   12.30
  -2   3   0  767.12   12.10
  -3  -3   0 2028.50   31.00
  -3   3   0 2055.89   30.90
   3   3   0 2066.19   31.10
   3   3   0 2081.29   31.10
  -3  -3   0 2075.79   31.10
   3  -3   0 2081.69   30.80
   3  -3   0 2088.29   31.60
   3   3   0 2148.39   31.50
   3  -3   0 2065.09   31.20
  -3   3   0 2069.99   31.50
  -3   3   0 2064.69   31.40
   3  -3   0 2009.90   30.70
  -4  -3   0  219.38    4.60
   4   3   0  219.88    4.50
  -4  -3   0  222.08    4.40
  -4   3   0  224.38    4.50
   4   3   0  217.58    4.80
   4  -3   0  219.68    4.30
  -4   3   0  220.48    4.90
   4   3   0  220.68    4.60
   4   3   0  222.68    4.60
   4  -3   0  218.28    4.70
  -5  -3   0    5.10    0.80
  -5   3   0    5.90    0.90
  -5   3   0    5.80    0.70
   5  -3   0    6.10    0.70
   5  -3   0    6.90    0.90
   5   3   0    6.40    0.90
   5   3   0    6.00    0.80
  -5  -3   0    5.40    0.70
  -5   3   0    5.30    0.80
   6  -3   0   33.00    1.50
  -6   3   0   31.60    1.60
   6  -3   0   31.80    1.70
   6   3   0   30.00    1.60
  -6  -3   0   32.30    1.70
   6   3   0   30.80    1.70
  -6  -3   0   32.00    1.50
  -6   3   0   34.60    1.80
  -6   3   0   33.70    1.80
  -7   3   0  217.58    5.20
  -7  -3   0  213.78    5.40
  -7   3   0  221.58    5.70
   7   3   0  211.38    5.40
   7  -3   0  219.38    4.90
   7  -3   0  218.08    5.50
  -7  -3   0  221.48    4.90
  -7   3   0  224.58    5.50
   7   3   0  225.98    5.40
  -8  -3   0  135.29    4.20
  -8   3   0  139.49    4.30
   8   3   0  137.89    5.00
   8  -3   0  139.09    4.30
  -8   3   0  135.79    4.10
  -8  -3   0  143.09    3.80
   8   3   0  135.39    4.90
   8  -3   0  140.89    3.90
  -8   3   0  143.99    4.60
   9  -3   0   10.10    1.30
  -9  -3   0   11.60    1.10
   9   3   0    8.80    1.40
  -9   3   0   11.40    1.30
   9   3   0   10.60    1.50
  -9   3   0   10.80    1.60
   9  -3   0   10.30    1.40
  -9  -3   0   10.80    1.50
  -9   3   0    7.90    1.20
 -10   3   0    1.10    0.60
 -10  -3   0    0.50    0.50
 -10   3   0    1.30    0.60
 -10   3   0    1.40    0.70
  10  -3   0    0.60    0.60
 -10  -3   0    0.30    0.70
 -11   3   0  163.08    5.30
 -11   3   0  167.08    5.30
 -11   3   0  168.18    5.80
 -11  -3   0  176.88    5.70
 -11  -3   0  167.98    4.70
 -12  -3   0   16.20    1.60
 -12   3   0   20.70    1.90
 -12  -3   0   22.10    2.10
 -12   3   0   20.10    1.90
 -12   3   0   19.20    2.50
 -13   3   0   -0.30    0.80
 -13   3   0    1.30    0.80
 -13   3   0    0.50    0.90
 -13  -3   0    2.10    0.90
   0   4   0 2695.93   40.10
  -1  -4   0  375.96    6.90
  -1  -4   0  377.86    6.60
  -1   4   0  371.06    6.30
  -1  -4   0  391.56    6.50
   1   4   0  382.36    6.90
  -1   4   0  387.76    7.10
   1  -4   0  387.16    6.70
   1   4   0  386.66    6.40
  -1   4   0  397.16    6.90
   1  -4   0  388.46    6.20
   2  -4   0  301.47    5.10
  -2  -4   0  296.97    5.60
   2   4   0  289.67    5.60
   2   4   0  296.17    5.40
   2  -4   0  300.47    5.60
  -2  -4   0  303.57    5.50
  -2  -4   0  303.67    5.40
  -2   4   0  296.77    6.00
  -2   4   0  289.77    5.20
   2  -4   0  301.17    6.00
  -2   4   0  301.87    5.30
  -2  -4   0  308.17    5.60
  -2   4   0  305.77    5.80
   3   4   0 4366.76  136.29
   3  -4   0 4245.38  127.59
  -3   4   0 4033.50  133.79
  -4   4   0    4.20    0.60
   4  -4   0    4.20    0.70
   4  -4   0    4.40    0.50
   4  -4   0    4.20    0.60
   4   4   0    4.50    0.60
  -4  -4   0    3.90    0.60
   4  -4   0    4.10    0.80
   4   4   0    4.80    0.70
  -4   4   0    2.60    0.70
   4   4   0    2.90    0.60
  -4  -4   0    3.30    0.60
   5   4   0  823.12   14.10
  -5   4   0  798.22   14.20
  -5   4   0  820.12   14.20
   5  -4   0  823.92   13.90
   5  -4   0  817.52   13.20
   5   4   0  821.92   13.80
  -5  -4   0  827.42   13.50
   5  -4   0  793.72   13.40
  -5   4   0  811.92   13.60
  -5  -4   0  813.62   15.00
   6   4   0  318.37    6.70
   6  -4   0  313.67    6.10
  -6   4   0  308.87    6.90
   6   4   0  317.07    6.90
  -6   4   0  326.47    6.50
  -6  -4   0  312.17    6.70
  -6  -4   0  306.27    6.30
  -6   4   0  302.37    6.90
   6  -4   0  316.67    6.80
  -7   4   0   53.49    2.50
   7  -4   0   59.09    2.50
   7   4   0   57.69    2.50
   7   4   0   57.09    2.50
  -7  -4   0   56.99    2.20
  -7   4   0   57.99    2.70
  -7   4   0   60.59    2.40
   7  -4   0   58.29    2.10
  -7  -4   0   60.59    2.50
  -8   4   0  228.68    6.10
  -8  -4   0  224.68    5.20
   8  -4   0  219.28    6.50
  -8  -4   0  215.58    5.70
   8  -4   0  219.88    5.10
   8   4   0  210.38    5.70
  -8   4   0  217.88    5.50
  -8   4   0  213.88    5.80
   8   4   0  215.48    5.60
  -9   4   0   67.49    2.90
  -9   4   0   66.09    4.10
  -9  -4   0   65.09    3.00
  -9  -4   0   70.89    2.60
   9  -4   0   65.49    2.60
  -9   4   0   64.19    3.00
   9  -4   0   63.49    2.90
 -10   4   0  341.77    8.30
 -10  -4   0  337.47    7.40
 -10  -4   0  333.47    8.20
 -10   4   0  348.17    9.20
 -10   4   0  342.67    8.80
 -11   4   0   35.20    2.50
 -11   4   0   29.30    2.40
 -11   4   0   31.70    2.20
 -11  -4   0   27.80    1.80
 -11  -4   0   31.60    2.30
 -12   4   0   29.70    2.30
 -12  -4   0   29.00    2.30
 -12  -4   0   29.90    1.90
 -12   4   0   32.80    2.40
 -12   4   0   27.40    2.50
 -13   4   0   30.60    2.40
 -13   4   0   34.00    2.90
 -13  -4   0   30.40    2.60
 -13   4   0   26.90    2.30
   0  -5   0    1.70    0.40
   0  -5   0    2.00    0.50
   0  -5   0    1.50    0.40
   0   5   0    1.30    0.30
   0   5   0    2.30    0.60
   0   5   0    1.90    0.50
   1  -5   0    0.50    0.40
  -1  -5   0    0.30    0.30
   1   5   0    0.10    0.40
  -1   5   0    0.30    0.40
   1   5   0    0.00    0.20
  -1   5   0    0.20    0.40
  -1  -5   0    0.20    0.40
  -1  -5   0    1.10    0.50
   1  -5   0    0.70    0.30
   1  -5   0   -0.10    0.30
  -1   5   0    0.40    0.30
  -2  -5   0  822.32   13.50
  -2  -5   0  814.72   13.20
   2  -5   0  820.82   13.20
  -2   5   0  811.62   12.90
   2  -5   0  825.32   13.90
   2  -5   0  794.02   12.60
   2   5   0  822.42   13.50
  -2   5   0  798.72   12.70
  -2  -5   0  817.02   13.00
  -2   5   0  835.92   13.50
  -2   5   0  750.82   14.40
  -2  -5   0  813.32   13.10
   2   5   0  788.92   12.80
  -3   5   0  404.06    8.40
  -3   5   0  402.16    7.20
   3  -5   0  393.66    8.00
  -3   5   0  399.36    8.00
   3  -5   0  403.76    7.50
   3   5   0  409.16    7.60
  -3  -5   0  405.66    7.50
   3  -5   0  403.76    6.90
  -3  -5   0  403.86    7.30
   4  -5   0 1954.60   29.60
   4   5   0 1925.41   29.50
  -4   5   0 1924.91   29.90
   4   5   0 1891.91   29.80
  -4   5   0 1900.41   29.10
   4   5   0 1928.71   29.30
   4  -5   0 1885.61   28.80
  -4  -5   0 1898.71   29.30
   4  -5   0 1885.31   30.10
  -4  -5   0 1891.11   30.20
  -4   5   0 1853.71   30.00
   5  -5   0    8.70    0.80
  -5   5   0   10.00    0.90
  -5  -5   0    9.40    1.00
   5   5   0    9.70    1.00
  -5  -5   0    9.60    0.90
   5   5   0    9.40    1.20
  -5   5   0    8.70    1.10
   5  -5   0    9.90    0.80
   5  -5   0   10.70    1.00
   6   5   0   30.10    1.70
  -6  -5   0   30.00    1.70
   6   5   0   29.90    1.80
  -6   5   0   29.90    1.60
  -6   5   0   30.20    1.90
  -6   5   0   31.60    1.90
  -6  -5   0   31.80    1.60
   6  -5   0   27.70    1.70
   6  -5   0   31.10    1.40
   6  -5   0   30.50    1.50
  -7   5   0  102.49    3.60
   7  -5   0   95.99    2.90
   7  -5   0   96.59    3.40
  -7   5   0   93.89    3.60
   7  -5   0   96.69    3.10
  -7  -5   0   95.59    3.00
  -7   5   0   95.99    3.20
   7   5   0   97.59    4.50
  -7  -5   0   97.69    3.30
  -8  -5   0  160.78    4.30
   8  -5   0  167.28    4.50
   8  -5   0  157.68    4.90
  -8   5   0  159.28    5.10
  -8  -5   0  154.78    4.70
   8   5   0  158.48    4.90
   8  -5   0  160.08    4.10
   8   5   0  164.38    4.70
  -8   5   0  150.28    4.80
  -8   5   0  164.88    4.60
  -9  -5   0   17.20    1.40
  -9   5   0   16.10    1.60
  -9  -5   0   21.30    1.80
  -9   5   0   18.90    1.80
   9  -5   0   19.30    1.40
   9  -5   0   18.30    1.50
  -9   5   0   19.10    1.60
 -10   5   0   -0.10    0.70
  10  -5   0    0.70    0.60
 -10   5   0    0.90    0.60
 -10  -5   0    0.60    0.80
 -10  -5   0   -0.30    0.50
 -10   5   0    0.70    1.00
 -11  -5   0   47.80    2.80
 -11   5   0   45.80    2.80
 -11   5   0   49.40    2.70
 -11   5   0   40.50    3.00
  11  -5   0   44.40    2.60
 -11  -5   0   41.80    2.30
 -12   5   0   10.00    2.30
 -12  -5   0    5.70    1.30
 -12  -5   0    4.00    1.00
 -12   5   0    3.20    1.00
 -12   5   0    7.30    1.50
  12  -5   0    3.50    1.00
   0   6   0 1534.15   24.20
   0  -6   0 1568.04   23.70
   0   6   0 1524.75   23.20
   0   6   0 1495.25   24.30
   0  -6   0 1545.15   23.30
   0  -6   0 1536.95   24.40
  -1  -6   0 1035.60   17.00
   1  -6   0 1034.90   16.40
  -1   6   0 1055.59   16.90
  -1   6   0 1009.70   15.90
   1  -6   0 1003.70   15.80
  -1  -6   0 1036.10   16.30
  -1  -6   0 1014.50   16.10
  -1   6   0 1049.20   17.20
   1   6   0 1013.70   16.00
   1  -6   0 1018.90   17.20
   1   6   0 1010.90   16.90
  -2  -6   0  147.69    3.50
  -2  -6   0  146.99    3.50
  -2  -6   0  144.09    3.30
   2  -6   0  141.09    3.00
  -2   6   0  141.99    3.80
  -2   6   0  141.39    4.00
   2  -6   0  144.39    3.50
  -2   6   0  142.39    3.10
  -2  -6   0  149.49    3.80
  -2   6   0  147.99    3.30
   2  -6   0  139.09    4.00
   2   6   0  140.99    3.20
   2   6   0  136.19    3.70
   3  -6   0   57.99    2.10
   3   6   0   56.29    1.90
  -3   6   0   54.99    1.90
  -3  -6   0   54.79    2.20
  -3  -6   0   51.49    2.00
  -3   6   0   49.60    2.30
   3  -6   0   54.59    1.70
   3  -6   0   54.19    2.40
  -3  -6   0   56.69    1.90
  -3   6   0   57.69    2.30
   3   6   0   52.99    2.10
  -4   6   0  421.96    8.50
   4  -6   0  422.56    7.40
  -4  -6   0  419.46    8.10
   4  -6   0  416.06    8.00
  -4   6   0  404.26    8.70
   4  -6   0  427.06    8.80
   4   6   0  406.26    8.20
  -4   6   0  409.36    7.80
   4   6   0  433.26    8.50
   4   6   0  425.06    7.90
  -4  -6   0  422.96    8.00
  -5  -6   0   92.79    3.00
   5  -6   0   94.19    3.10
   5   6   0   90.89    3.20
  -5   6   0   90.19    2.80
   5  -6   0   90.59    3.40
  -5  -6   0   86.69    2.80
   5   6   0   86.29    2.90
  -5   6   0   85.89    3.20
   5   6   0   90.69    2.90
  -5   6   0   85.69    3.30
  -6   6   0  119.59    4.10
  -6  -6   0  124.99    3.70
  -6   6   0  124.19    3.60
  -6  -6   0  127.49    3.70
   6  -6   0  123.09    3.20
   6  -6   0  125.09    3.80
   6   6   0  123.49    3.60
   6   6   0  126.59    4.10
  -6   6   0  118.89    4.10
   6  -6   0  119.99    3.30
   6   6   0  125.99    3.70
  -7  -6   0   46.30    2.20
  -7   6   0   44.40    2.50
  -7   6   0   46.30    2.60
  -7   6   0   44.90    2.20
  -7  -6   0   42.70    2.20
   7  -6   0   46.00    2.30
   7   6   0   44.10    2.20
   7  -6   0   46.10    1.90
   7   6   0   48.60    2.50
   7  -6   0   45.20    2.00
  -8   6   0   76.69    3.10
  -8   6   0   74.29    4.10
   8  -6   0   76.89    2.70
  -8  -6   0   83.69    3.20
   8  -6   0   79.39    2.90
  -8   6   0   85.79    3.60
  -8  -6   0   79.39    2.90
   8  -6   0   86.79    3.30
   9  -6   0    1.30    0.50
   9  -6   0    1.60    0.60
  -9   6   0    2.00    0.90
  -9   6   0    1.80    0.90
  -9  -6   0    1.40    0.60
  -9  -6   0    0.90    0.60
  -9   6   0    1.60    0.70
  10  -6   0    5.90    1.20
 -10  -6   0    5.60    1.20
 -10   6   0    9.00    1.30
 -10   6   0    5.60    1.20
 -10   6   0    7.50    1.50
 -10  -6   0    9.20    1.70
 -11   6   0   43.20    2.90
 -11  -6   0   36.40    2.10
 -11   6   0   40.10    2.70
  11  -6   0   39.00    2.40
 -11   6   0   39.50    2.50
 -11  -6   0   41.20    2.60
 -12   6   0    3.80    1.10
 -12   6   0    6.00    1.30
  12  -6   0    6.70    1.30
 -12  -6   0    5.60    1.30
 -12   6   0    6.50    1.50
   0   7   0    1.00    0.50
   0  -7   0    2.70    0.60
   0  -7   0    2.50    0.60
   0   7   0    1.90    0.40
   0   7   0    1.30    0.60
   0  -7   0    2.10    0.50
   1  -7   0    9.20    0.70
  -1   7   0   11.00    1.10
  -1  -7   0    8.30    1.00
   1   7   0    8.50    0.90
   1  -7   0    8.80    0.90
  -1   7   0    9.70    0.70
  -1   7   0   12.00    1.20
  -1  -7   0   11.60    0.90
   1  -7   0   10.10    1.10
   1   7   0    9.70    1.20
  -1  -7   0    9.10    0.80
  -2   7   0   74.19    2.20
  -2  -7   0   80.19    2.40
  -2   7   0   79.89    2.30
   2   7   0   82.09    2.30
  -2   7   0   74.19    2.90
  -2  -7   0   75.09    2.80
  -2  -7   0   76.99    2.40
   2  -7   0   77.49    2.10
  -2  -7   0   78.89    2.50
   2  -7   0   76.89    3.00
  -2   7   0   71.89    2.70
   2   7   0   74.69    2.80
   2  -7   0   82.59    2.90
   3  -7   0   37.80    1.70
  -3  -7   0   37.20    1.90
   3   7   0   37.10    1.90
   3  -7   0   35.40    1.30
  -3   7   0   34.30    1.50
  -3   7   0   33.50    1.50
  -3   7   0   35.50    1.90
  -3   7   0   33.80    2.00
   3   7   0   35.30    1.50
  -3  -7   0   36.80    1.70
  -3  -7   0   39.50    1.70
   3  -7   0   32.60    1.90
  -4   7   0    3.30    0.60
  -4  -7   0    4.60    0.80
   4   7   0    3.50    0.80
  -4  -7   0    4.50    0.80
   4  -7   0    3.90    1.00
   4  -7   0    4.10    0.70
   4   7   0    3.60    0.70
  -4   7   0    4.00    1.00
  -4   7   0    3.50    0.90
  -4  -7   0    4.00    0.70
   4  -7   0    4.10    0.60
  -5  -7   0   68.29    2.60
  -5  -7   0   65.89    2.50
   5  -7   0   65.79    2.20
   5   7   0   66.39    2.70
   5  -7   0   66.29    3.00
   5   7   0   68.69    2.50
  -5   7   0   68.09    3.00
   5  -7   0   66.39    2.60
  -5  -7   0   67.89    2.60
   5   7   0   65.29    2.90
  -5   7   0   66.79    2.90
  -5   7   0   68.59    2.50
  -6   7   0  333.97    8.20
  -6  -7   0  347.17    7.50
  -6   7   0  337.97    8.10
   6   7   0  368.26    7.80
   6  -7   0  347.17    7.60
   6   7   0  360.86    8.20
   6   7   0  336.77    8.20
  -6   7   0  366.06    7.50
  -6  -7   0  362.36    7.50
   6  -7   0  357.96    7.00
   7   7   0   16.00    1.50
  -7   7   0   21.00    1.60
  -7  -7   0   21.90    1.60
  -7   7   0   20.90    1.80
  -7  -7   0   19.60    1.50
   7  -7   0   21.60    1.40
  -7   7   0   22.30    1.90
  -8  -7   0    3.70    0.80
   8  -7   0    3.50    0.80
  -8   7   0    2.80    0.80
  -8  -7   0    3.90    0.80
   8  -7   0    3.90    0.80
  -8   7   0    3.40    1.10
   8  -7   0    4.60    0.90
  -9  -7   0   42.30    2.40
  -9   7   0   38.40    2.70
  -9   7   0   41.30    2.50
   9  -7   0   39.00    2.10
  -9   7   0   41.40    2.70
 -10  -7   0    2.70    0.80
 -10   7   0    3.40    1.10
 -10   7   0    5.10    1.10
 -10  -7   0    4.00    1.10
 -10   7   0    3.00    1.20
  10  -7   0    2.80    0.90
 -11  -7   0    5.00    1.20
  11  -7   0    5.60    1.10
 -11  -7   0    3.40    1.20
 -11   7   0    3.60    1.10
 -11   7   0    4.10    1.20
 -11   7   0    3.80    1.30
   0   8   0    0.50    0.30
   0  -8   0    0.90    0.50
   0   8   0    0.30    0.50
   0   8   0    0.50    0.50
   0  -8   0    0.10    0.30
  -1   8   0    6.00    1.10
   1  -8   0    4.10    0.70
   1   8   0    5.30    0.70
   1  -8   0    4.40    0.90
   1   8   0    3.30    0.80
  -1   8   0    4.60    1.00
   1  -8   0    4.20    0.60
  -1  -8   0    4.70    0.70
  -1   8   0    3.70    0.90
  -1  -8   0    4.80    1.00
   2  -8   0  252.77    4.90
   2  -8   0  253.97    6.40
   2   8   0  258.77    5.20
  -2   8   0  251.67    6.40
  -2  -8   0  249.38    5.50
  -2  -8   0  263.57    5.50
  -2   8   0  258.27    6.20
  -2  -8   0  254.57    6.20
  -2   8   0  246.48    5.30
  -2   8   0  246.08    5.60
   2   8   0  258.17    6.20
  -2  -8   0  255.17    5.30
   2  -8   0  254.67    5.50
   3  -8   0    0.20    0.40
   3  -8   0    0.40    0.30
   3  -8   0    0.20    0.50
  -3  -8   0   -0.20    0.30
   3   8   0    0.10    0.40
  -3   8   0    0.50    0.30
   3   8   0    0.50    0.40
  -3  -8   0   -0.30    0.30
  -3   8   0    2.20    0.80
  -3   8   0    0.10    0.50
  -3  -8   0    0.10    0.40
  -3   8   0   -0.10    0.30
   4   8   0  203.18    5.50
   4  -8   0  210.98    6.00
  -4   8   0  209.48    5.00
   4  -8   0  214.48    4.50
  -4   8   0  214.48    6.00
  -4   8   0  215.48    5.70
  -4  -8   0  216.48    5.50
   4  -8   0  219.58    5.20
  -4  -8   0  219.48    5.00
   4   8   0  212.68    4.90
  -4  -8   0  216.28    5.10
   5   8   0  177.28    4.50
  -5   8   0  189.08    5.60
  -5   8   0  186.48    4.70
  -5  -8   0  179.98    5.00
  -5  -8   0  180.28    4.60
   5  -8   0  191.98    4.90
  -5   8   0  169.68    5.20
   5   8   0  178.18    5.30
   5  -8   0  171.68    5.50
   5   8   0  177.08    5.00
  -5  -8   0  185.48    4.70
   5  -8   0  178.18    4.10
  -6   8   0   17.00    1.50
   6  -8   0   16.20    1.40
   6   8   0   16.40    1.40
   6  -8   0   16.60    1.20
  -6  -8   0   16.80    1.40
  -6   8   0   16.40    1.80
  -6   8   0   15.50    2.00
  -6  -8   0   17.00    1.50
  -6  -8   0   15.30    1.40
   6   8   0   17.50    1.50
   7  -8   0   52.99    2.50
   7   8   0   51.09    2.60
   7  -8   0   51.29    2.10
  -7   8   0   54.79    3.00
  -7  -8   0   49.50    2.40
  -7   8   0   50.19    2.90
  -7  -8   0   48.20    2.50
  -7   8   0   51.89    2.50
  -8   8   0   41.60    2.40
  -8  -8   0   40.70    2.30
  -8   8   0   43.00    2.70
   8  -8   0   37.30    2.00
  -8  -8   0   36.40    2.10
  -8   8   0   38.50    2.70
  -9   8   0   12.40    1.60
  -9  -8   0   13.30    1.70
  -9   8   0   14.10    2.00
  -9   8   0   11.40    1.70
   9  -8   0   14.00    1.30
  -9  -8   0   15.00    1.50
  10  -8   0    0.00    0.50
 -10   8   0   -0.60    0.60
 -10  -8   0    0.30    0.70
 -10   8   0    0.40    0.80
 -10   8   0    0.60    0.70
 -11   8   0   21.90    2.00
 -11   8   0   26.40    2.50
 -11   8   0   20.50    2.60
  11  -8   0   22.30    1.80
 -11  -8   0   22.70    2.00
   0  -9   0    2.00    0.60
   0   9   0    0.10    0.30
   0  -9   0    0.90    0.40
   0  -9   0    0.40    0.50
   0   9   0    1.60    0.80
   0   9   0    1.00    0.70
   1   9   0    5.00    0.70
   1  -9   0    5.20    1.00
  -1   9   0    6.10    0.80
   1   9   0    5.10    1.10
  -1  -9   0    4.90    0.80
   1  -9   0    6.90    0.80
  -1   9   0    4.60    1.10
  -1  -9   0    6.10    0.90
   1  -9   0    6.60    0.90
  -1   9   0    5.90    1.20
   2  -9   0  297.57    7.60
  -2  -9   0  320.57    8.40
   2   9   0  315.07    6.20
   2  -9   0  303.57    5.90
  -2   9   0  300.37    7.50
  -2  -9   0  306.27    6.50
   2  -9   0  309.67    6.50
  -2   9   0  308.07    6.10
  -2   9   0  311.97    6.40
  -2  -9   0  311.77    6.30
   2   9   0  304.87    7.30
  -2   9   0  311.67    7.30
  -2  -9   0  316.67    6.40
   3   9   0  266.97    6.70
   3  -9   0  264.47    7.10
  -3  -9   0  263.37    5.80
  -3   9   0  269.37    6.80
   3   9   0  276.97    5.80
  -3   9   0  269.87    7.10
  -3   9   0  271.67    6.00
  -3   9   0  262.77    5.60
  -3  -9   0  307.07    9.60
   3  -9   0  267.47    5.30
   3  -9   0  268.47    6.00
  -3  -9   0  273.87    5.80
   4  -9   0   16.60    1.30
  -4   9   0   15.90    1.60
  -4   9   0   15.80    1.30
  -4  -9   0   24.10    3.30
   4   9   0   18.60    1.60
  -4   9   0   14.10    1.80
  -4  -9   0   16.60    1.30
   4  -9   0   15.20    1.00
   4   9   0   18.30    1.30
  -4  -9   0   17.50    1.30
   5   9   0    7.70    1.30
  -5   9   0    8.00    1.80
   5   9   0    6.60    1.00
  -5  -9   0    7.90    1.10
  -5  -9   0    7.50    1.10
  -5   9   0    8.00    1.20
  -5  -9   0    5.90    1.00
  -5   9   0    6.90    1.30
   5  -9   0    8.20    0.80
   5  -9   0    8.20    1.20
  -6  -9   0   10.60    1.20
   6  -9   0   11.60    2.00
   6  -9   0   11.00    1.10
  -6   9   0    8.40    1.40
  -6  -9   0   12.20    1.40
  -6   9   0   12.70    1.30
  -6  -9   0   10.30    1.40
  -6   9   0    9.20    1.40
   6   9   0    9.90    1.40
  -7  -9   0  158.18    4.90
  -7   9   0  164.08    4.90
   7  -9   0  157.38    4.80
  -7   9   0  158.38    5.50
  -7  -9   0  154.48    4.70
  -7  -9   0  159.38    4.60
  -7   9   0  160.38    5.60
   7  -9   0  169.68    4.20
   7   9   0  163.28    5.10
  -8   9   0   78.69    3.90
  -8  -9   0   77.59    3.90
   8  -9   0   76.09    2.80
  -8  -9   0   74.79    3.10
  -8   9   0   80.19    3.30
  -8   9   0   76.99    3.90
  -8  -9   0   68.49    3.10
  -9  -9   0    2.70    0.80
  -9   9   0    3.10    0.80
  -9   9   0    1.10    0.90
  -9   9   0    2.80    1.10
   9  -9   0    2.70    0.70
 -10   9   0    5.20    1.50
  10  -9   0    7.80    1.30
 -10   9   0    5.60    1.30
 -10  -9   0    3.70    1.00
 -10   9   0    5.90    1.20
   0 -10   0   15.20    1.90
   0 -10   0   14.00    1.20
   0 -10   0   14.00    1.10
   0  10   0   10.40    1.50
   0  10   0   13.70    1.10
   1  10   0   18.20    1.70
  -1  10   0   15.30    1.10
   1 -10   0   15.00    1.10
   1  10   0   15.60    1.10
  -1  10   0   15.20    1.60
   1 -10   0   16.10    1.20
  -1 -10   0   17.70    1.60
  -1 -10   0   15.80    1.20
  -1  10   0   18.60    1.70
  -1 -10   0   13.90    1.20
  -2  10   0  382.56    8.80
   2 -10   0  374.16    7.10
   2 -10   0  386.36    7.70
  -2  10   0  375.86    7.40
  -2 -10   0  374.26    7.40
   2  10   0  379.26    7.50
  -2  10   0  387.56    7.80
  -2 -10   0  379.56    8.90
  -2 -10   0  394.86    7.60
   2  10   0  374.36    8.80
  -2  10   0  412.66   10.70
  -3  10   0   -0.30    0.50
  -3 -10   0    0.20    0.50
  -3  10   0    0.50    0.40
  -3 -10   0    0.10    0.60
   3 -10   0   -0.20    0.40
   3  10   0    0.10    0.60
  -3  10   0   -0.10    0.30
   3  10   0   -0.10    0.40
  -3  10   0   -0.40    0.60
   3 -10   0    1.20    0.60
  -3 -10   0    1.00    0.60
   4  10   0   75.19    2.70
  -4 -10   0   78.69    2.80
   4 -10   0   76.19    2.80
  -4 -10   0   78.09    3.40
  -4  10   0   84.49    3.80
   4 -10   0   80.59    2.40
  -4 -10   0   78.89    2.70
   4  10   0   80.99    3.50
  -4  10   0   73.19    2.90
  -4  10   0   74.99    3.60
   5  10   0   20.70    1.90
   5 -10   0   26.60    1.70
  -5  10   0   21.80    2.10
   5 -10   0   23.80    1.30
   5  10   0   22.50    1.60
  -5 -10   0   28.00    1.70
  -5 -10   0   24.60    1.60
  -5  10   0   21.60    1.60
  -5  10   0   24.80    2.10
   6 -10   0   12.80    1.10
  -6  10   0   13.70    1.60
   6 -10   0   11.50    1.50
  -6 -10   0   12.90    1.30
  -6  10   0   12.70    1.80
   6  10   0   12.20    1.70
  -6 -10   0   12.30    1.40
  -6  10   0   14.60    2.00
  -7 -10   0    3.20    0.90
   7 -10   0    4.90    0.80
  -7  10   0    6.10    1.20
  -7  10   0    2.20    1.20
   7 -10   0    3.90    1.00
  -7 -10   0    4.90    1.00
  -7  10   0    4.80    1.30
   7  10   0    6.50    1.30
   8 -10   0  127.39    3.70
  -8  10   0  125.39    5.20
  -8 -10   0  112.39    4.00
  -8  10   0  129.89    5.20
  -8 -10   0  127.19    4.10
  -8  10   0  124.89    4.50
   9 -10   0    4.10    0.90
  -9  10   0    5.90    1.20
  -9  10   0    3.60    1.30
  -9 -10   0    2.90    0.80
   0 -11   0    2.00    0.60
   0  11   0    2.40    0.60
   0  11   0    2.20    0.80
   0 -11   0    2.50    0.60
  -1  11   0   53.09    3.00
   1 -11   0   56.29    2.20
  -1 -11   0   54.89    2.30
   1 -11   0   53.89    2.20
  -1 -11   0   58.49    2.20
  -1  11   0   55.39    3.00
  -1 -11   0   54.79    2.10
  -1  11   0   56.79    2.20
   1  11   0   58.89    3.10
   1  11   0   54.89    2.20
  -1  11   0   55.39    3.10
   2 -11   0    5.70    0.90
   2 -11   0    5.70    0.90
  -2  11   0    4.20    1.20
  -2  11   0    5.30    1.20
  -2  11   0    4.10    0.80
  -2 -11   0    6.40    0.90
   2  11   0    6.20    0.90
   2  11   0    5.80    1.20
  -2 -11   0    5.20    0.80
   3  11   0  122.49    3.60
  -3 -11   0  129.19    3.60
   3 -11   0  124.29    3.70
   3  11   0  125.99    4.60
  -3  11   0  123.19    4.70
   3 -11   0  122.39    3.30
  -3 -11   0  127.79    3.50
  -3  11   0  130.59    4.90
  -3  11   0  124.89    4.90
   4  11   0   43.50    2.70
  -4  11   0   40.10    2.70
   4 -11   0   42.60    1.80
  -4  11   0   47.20    2.40
  -4 -11   0   39.80    2.00
  -4  11   0   43.80    2.80
   4  11   0   46.30    2.10
   4 -11   0   43.80    2.10
  -4 -11   0   44.70    2.00
   5 -11   0   33.80    1.60
  -5  11   0   33.40    2.10
  -5  11   0   32.30    2.60
   5  11   0   31.50    2.30
   5 -11   0   30.40    2.10
  -5 -11   0   32.20    1.80
  -5  11   0   30.20    2.40
  -5 -11   0   32.30    1.80
  -6  11   0    8.00    1.50
   6  11   0    9.00    1.60
  -6  11   0    6.30    1.20
  -6 -11   0    7.00    1.00
  -6  11   0    7.40    1.50
   6 -11   0    7.60    1.10
   6 -11   0    9.10    0.90
  -7  11   0   78.19    3.40
  -7  11   0   81.99    4.20
   7  11   0   72.79    3.60
  -7  11   0   77.09    3.90
   7 -11   0   77.89    2.70
  -7 -11   0   78.79    2.90
  -7 -11   0   75.09    3.00
   8 -11   0    9.00    1.10
  -8  11   0   11.20    1.60
   8  11   0   10.50    1.60
  -8  11   0    5.70    2.70
  -8 -11   0    8.90    1.20
  -8 -11   0   10.40    1.50
   0  12   0    4.70    1.20
   0  12   0    4.40    0.80
   0 -12   0    4.80    0.80
   0 -12   0    4.80    0.80
   0 -12   0    4.90    0.80
   1 -12   0   28.80    1.60
   1  12   0   30.50    2.40
   1 -12   0   28.00    1.60
  -1  12   0   26.40    1.60
  -1 -12   0   30.00    1.60
  -1  12   0   28.70    2.50
  -1  12   0   28.60    1.90
   1  12   0   26.20    1.70
  -1 -12   0   29.70    1.50
   2  12   0   16.40    2.00
  -2  12   0   20.00    2.10
   2 -12   0   17.50    1.30
  -2  12   0   20.90    1.70
  -2  12   0   16.00    1.20
   2 -12   0   19.10    1.40
   2  12   0   19.00    1.30
  -2 -12   0   21.40    1.30
  -2  12   0   21.90    2.20
  -3 -12   0   43.70    1.90
  -3  12   0   43.60    2.90
   3  12   0   39.00    2.10
  -3  12   0   45.80    3.00
   3 -12   0   38.80    1.80
  -3 -12   0   38.90    1.80
   3  12   0   41.30    2.70
  -3  12   0   36.50    2.20
   3 -12   0   39.70    1.90
   4 -12   0  119.39    3.70
  -4  12   0  125.79    4.20
  -4 -12   0  125.09    3.50
   4  12   0  123.29    4.80
  -4  12   0  124.69    5.00
  -4  12   0  119.69    5.10
  -4 -12   0  129.59    3.50
   4 -12   0  124.39    3.40
  -5  12   0   75.29    4.00
  -5  12   0   77.49    3.90
   5  12   0   60.69    3.40
  -5  12   0   65.79    3.10
   5 -12   0   63.99    2.30
  -5 -12   0   66.09    2.50
  -5 -12   0   66.59    2.50
  -6 -12   0    5.50    1.00
  -6 -12   0    6.60    0.90
   6  12   0    8.10    1.40
   6 -12   0    6.10    0.90
   6 -12   0    6.70    1.00
  -6  12   0    6.60    1.20
  -6  12   0    6.20    2.70
  -6  12   0    5.70    1.50
   7 -12   0   49.30    2.00
  -7  12   0   51.79    2.80
  -7 -12   0   47.40    2.20
  -7  12   0   45.60    3.30
   7  12   0   47.30    3.00
  -7  12   0   48.40    3.40
   0  13   0    1.70    0.90
   0 -13   0    3.10    0.80
   1  13   0  145.89    4.20
   1  13   0  145.49    5.50
   1 -13   0  143.79    4.00
  -1  13   0  142.59    4.50
  -1  13   0  137.59    4.00
  -1  13   0  147.99    5.60
  -2  13   0   13.20    2.00
   2  13   0   12.40    1.90
   2 -13   0   16.70    1.20
  -2  13   0   12.10    1.20
  -2  13   0   15.50    1.50
   2 -13   0   13.60    1.20
  -2  13   0   16.20    2.20
  -3  13   0   81.19    4.10
  -3  13   0   84.39    3.40
   3  13   0   79.59    4.00
  -3  13   0   86.69    4.40
   3 -13   0   87.79    2.80
  -4  13   0    1.80    1.00
   4 -13   0    0.40    0.60
  -4  13   0   -0.30    0.80
   4  13   0   -0.10    0.70
  -4  13   0    0.10    0.60
   4 -13   0    1.40    0.60
   5  13   0   46.60    3.10
   5 -13   0   43.10    1.90
  -5  13   0   41.90    3.20
  -5  13   0   45.40    3.70
  -5  13   0   44.50    2.60
   0  14   0   90.89    3.60
   0  14   0   73.39    3.80
   0  14   0   88.49    4.40
   1 -14   0  106.39    3.40
   1  14   0  103.29    4.90
  -1  14   0  105.69    4.80
  -1  14   0  101.19    3.80
  -2   0   1 1746.83   60.39
  -2   0  -1 1613.04   58.89
   2   0  -1 1764.32   60.39
   2   0   1 1949.01   64.19
  -3   0  -1  183.48    3.70
  -3   0  -1  179.38    3.50
   3   0  -1  187.38    3.70
  -3   0   1  186.98    3.70
   3   0   1  185.48    3.70
   3   0   1  186.28    3.60
   3   0  -1  185.28    3.60
   4   0  -1 1853.81   28.00
  -4   0  -1 1814.82   28.00
  -4   0   1 1849.11   28.00
   4   0   1 1827.62   27.90
   4   0   1 1825.62   27.70
   5   0  -1   39.10    1.60
  -5   0  -1   39.80    1.60
   5   0   1   40.10    1.60
   5   0   1   37.70    1.90
  -5   0   1   37.70    1.60
  -5   0   1   38.00    1.70
   6   0   1  871.51   14.70
  -6   0  -1  881.31   14.60
   6   0  -1  878.31   14.80
  -6   0   1  861.21   14.70
  -6   0  -1  874.21   14.90
  -6   0   1  846.12   14.80
   6   0  -1  870.71   14.60
   6   0   1  879.21   14.50
   7   0   1  171.48    4.50
  -7   0  -1  166.08    4.60
  -7   0   1  175.28    4.50
  -7   0  -1  170.88    4.40
   7   0  -1  176.28    4.60
   7   0   1  172.28    4.30
   7   0  -1  171.28    4.40
  -7   0   1  167.28    4.60
  -8   0   1    2.50    0.70
   8   0   1    3.60    0.80
  -8   0  -1    3.20    0.70
   8   0   1    3.30    0.70
  -8   0  -1    2.40    0.80
  -8   0   1    4.40    0.90
   8   0  -1    2.50    0.60
   8   0  -1    4.10    0.90
   9   0  -1   22.90    1.80
   9   0  -1   22.00    1.60
  -9   0  -1   21.10    1.80
  -9   0   1   23.00    1.70
  -9   0  -1   25.30    1.70
   9   0   1   25.50    2.00
  -9   0   1   24.10    1.90
   9   0   1   23.00    1.70
 -10   0  -1   15.10    2.50
 -10   0   1   16.30    2.10
  10   0   1   14.90    1.40
 -10   0   1   16.20    1.70
 -10   0   1   19.30    1.50
 -10   0  -1   13.70    1.40
 -11   0  -1   62.29    3.10
 -11   0   1   61.49    3.30
 -11   0   1   64.19    2.80
 -11   0  -1   64.69    3.40
 -11   0   1   69.09    3.30
 -12   0  -1   51.09    3.10
 -12   0   1   49.20    2.90
 -12   0   1   46.50    3.00
 -12   0   1   49.60    2.60
 -12   0  -1   56.29    2.90
 -12   0  -1   44.50    2.70
 -12   0   1   45.30    2.40
 -13   0   1    3.00    1.20
 -13   0   1    2.40    1.00
 -13   0   1    2.20    0.90
 -13   0  -1    3.50    1.20
 -13   0  -1    1.60    1.00
 -13   0  -1    2.70    1.00
   0  -1  -1    0.00    0.10
   0  -1  -1    0.10    0.10
   0  -1   1    0.10    0.10
   0   1   1    0.00    0.10
  -1   1   1  943.91   14.20
   1  -1  -1  713.53   10.90
   2  -1   1  980.80   14.90
  -2  -1  -1  971.10   14.90
  -2  -1  -1  943.31   14.90
  -2   1   1  984.60   14.80
  -2   1   1  986.60   15.00
   2   1  -1 1006.10   14.90
   2  -1  -1  996.90   14.80
   2   1   1  971.10   14.90
  -2  -1   1  957.90   14.50
   2   1   1  958.60   14.90
  -2  -1   1  979.20   14.80
   2   1   1 1004.00   14.90
   2  -1  -1  981.30   15.00
  -2   1  -1  975.50   14.90
   3   1  -1 1420.36   21.50
  -3   1   1 1446.16   21.40
   3  -1   1 1399.66   21.50
  -3  -1  -1 1383.66   21.50
  -3   1   1 1422.06   21.40
  -3   1   1 1396.36   21.60
   3  -1   1 1413.66   21.20
   3   1   1 1394.56   21.50
  -3  -1   1 1416.96   21.10
  -3  -1   1 1433.76   21.50
   3   1   1 1415.76   21.50
   3  -1  -1 1437.36   21.70
  -3   1  -1 1409.06   21.60
   4   1  -1  111.99    2.80
   4  -1   1  110.69    2.60
   4  -1   1  105.59    2.80
   4   1  -1  108.09    2.80
  -4  -1  -1  110.49    2.80
  -4   1   1  116.59    2.80
  -4   1   1  113.29    2.70
  -4  -1  -1  109.69    2.70
   4   1   1  113.59    2.80
  -4   1  -1  105.79    2.80
  -4  -1   1  109.49    2.80
   4   1   1  115.99    2.80
  -4   1  -1  109.49    2.60
   4  -1  -1  111.09    2.70
  -4  -1   1  111.19    2.80
   4  -1  -1  108.89    2.80
   5   1  -1 1231.88   20.10
  -5   1   1 1186.98   19.00
  -5  -1  -1 1195.98   19.40
  -5  -1  -1 1212.78   19.20
  -5   1   1 1218.08   19.20
  -5   1   1 1192.48   19.40
   5  -1   1 1234.08   20.10
   5  -1   1 1207.78   19.00
   5  -1  -1 1194.78   19.30
  -5   1  -1 1205.28   19.30
   5   1   1 1207.48   19.10
  -5   1  -1 1224.08   19.00
   5   1   1 1217.58   19.20
   5  -1  -1 1192.68   19.00
  -5  -1   1 1178.28   19.20
   6   1  -1   86.09    2.70
  -6   1   1   87.19    2.70
   6  -1   1   89.59    2.60
   6  -1   1   88.79    2.80
  -6   1   1   83.39    2.70
  -6  -1  -1   85.99    2.90
  -6   1   1   88.89    2.90
   6   1  -1   89.89    2.90
  -6  -1  -1   90.19    2.80
  -6  -1   1   88.89    2.90
  -6   1  -1   88.39    2.70
  -6   1  -1   82.59    2.90
  -6  -1   1   88.09    2.80
   6  -1  -1   89.79    2.70
  -7   1   1  402.06    8.00
   7   1  -1  391.86    8.10
  -7   1   1  404.16    8.30
   7  -1   1  393.66    7.70
   7   1  -1  404.16    8.10
  -7  -1  -1  389.86    8.20
  -7  -1  -1  405.76    8.00
  -7   1   1  386.16    7.70
   7  -1   1  390.96    8.10
   7   1   1  399.96    7.90
   7  -1  -1  400.56    8.20
  -7  -1   1  383.46    8.00
   7   1   1  392.66    8.00
  -7   1  -1  384.06    8.20
  -7  -1   1  394.26    8.10
  -7   1  -1  401.06    7.90
   7  -1  -1  397.16    7.80
   8  -1   1   36.60    1.80
  -8  -1  -1   41.00    2.20
  -8   1   1   32.20    1.90
  -8   1   1   37.20    1.90
   8   1  -1   39.30    2.10
   8   1  -1   38.30    2.00
  -8  -1  -1   35.80    2.00
  -8   1   1   37.60    2.20
   8  -1   1   35.10    2.00
  -8  -1   1   41.10    2.10
   8  -1  -1   40.00    2.10
  -8   1  -1   37.60    2.10
   8   1   1   36.90    1.90
   8  -1  -1   35.50    1.90
  -8  -1   1   37.70    2.10
   8   1   1   37.90    2.10
  -8   1  -1   35.50    1.90
  -9  -1  -1   77.49    3.30
   9   1  -1   86.19    3.30
   9  -1   1   81.19    3.30
   9  -1   1   78.69    3.00
  -9  -1  -1   81.29    3.20
   9   1  -1   80.49    3.30
  -9   1   1   84.29    3.30
  -9   1   1   82.49    3.00
  -9   1   1   75.19    3.30
   9  -1  -1   76.59    2.90
  -9  -1   1   76.69    3.20
   9  -1  -1   70.99    3.10
   9   1   1   69.29    2.90
  -9   1  -1   76.39    3.00
  -9  -1   1   80.49    2.70
  -9  -1   1   72.39    3.10
  -9   1  -1   75.69    3.30
   9   1   1   70.69    3.00
  10  -1   1    9.30    1.30
 -10   1   1    9.30    2.20
 -10  -1  -1    9.20    1.40
 -10   1   1   10.90    1.50
 -10   1   1    8.50    1.20
 -10  -1  -1   12.30    1.30
 -10  -1   1    9.90    1.60
 -10  -1   1    9.90    1.10
 -10  -1   1    9.20    1.80
 -10   1  -1   10.30    1.50
 -10   1  -1   12.80    1.60
 -10   1  -1   11.20    1.60
 -11  -1  -1   34.10    2.10
 -11   1   1   41.20    2.70
 -11  -1  -1   38.70    2.60
 -11   1   1   33.50    2.30
 -11   1   1   33.80    2.10
 -11  -1  -1   33.30    2.30
 -11  -1   1   34.30    2.30
 -11  -1   1   36.70    2.00
 -11   1  -1   37.40    2.30
 -11   1  -1   34.60    2.50
 -11   1  -1   31.60    2.20
 -11  -1   1   32.50    2.30
 -12  -1  -1   30.50    2.30
 -12   1   1   37.30    2.70
 -12  -1  -1   36.50    2.70
 -12  -1  -1   35.30    2.20
 -12   1   1   35.80    2.50
 -12   1   1   36.40    2.20
 -12   1  -1   35.40    2.40
 -12  -1   1   35.40    2.10
 -12  -1   1   39.80    2.80
 -12  -1   1   37.00    2.60
 -12   1  -1   30.10    2.20
 -12   1  -1   34.80    2.70
 -13   1   1  105.29    4.80
 -13   1   1  102.09    4.50
 -13  -1  -1  114.49    4.70
 -13  -1  -1  105.19    4.20
 -13  -1  -1  106.09    4.80
 -13   1  -1  109.19    4.50
 -13  -1   1  101.39    3.90
 -13  -1   1  104.99    4.60
 -13  -1   1  111.49    4.80
 -13  -1   1   97.89    3.70
 -13   1  -1  105.99    4.30
 -13   1  -1  102.79    5.00
   0  -2   1  519.45    7.70
   0   2   1  518.25    7.90
   0  -2  -1  517.95    8.20
   0   2  -1  516.95    7.80
   0  -2   1  502.65    7.70
   0  -2   1  515.25    8.10
   0   2   1  517.25    8.20
   0   2  -1  499.45    8.10
   0  -2  -1  510.45    8.10
   0  -2  -1  506.55    7.90
   0   2  -1  513.15    7.60
   0   2   1  516.85    8.20
   1   2  -1 3831.02   85.89
  -1   2   1 3984.20   93.79
  -1  -2  -1 4009.10   93.29
   1  -2   1 3767.02   84.99
   1   2   1 3983.70   93.49
  -1  -2   1 3758.02   82.39
   1  -2  -1 3881.11   89.79
  -1   2  -1 3627.94   85.69
  -2  -2  -1 2261.77   74.19
  -2   2   1 2453.75   79.59
   2  -2   1 2358.86   85.09
   2   2  -1 2287.17   73.49
  -2   2  -1 2289.57   75.99
   2  -2  -1 2454.75   77.29
   2   2   1 2496.15   80.59
   3  -2   1  198.58    4.00
  -3  -2  -1  197.78    3.90
   3   2  -1  204.08    3.90
   3  -2   1  199.48    3.70
  -3   2   1  203.08    3.90
  -3   2   1  199.18    4.00
  -3  -2  -1  199.18    4.00
  -3   2   1  205.18    4.20
   3   2  -1  197.18    3.70
   3   2  -1  195.18    4.00
   3   2   1  205.08    4.10
  -3  -2   1  200.68    4.10
   3   2   1  203.18    4.00
   3  -2  -1  194.18    3.80
  -3   2  -1  199.58    3.80
  -3   2  -1  202.98    4.20
  -3  -2   1  202.88    3.70
  -3   2  -1  195.08    4.00
   3  -2  -1  201.38    4.10
   3  -2  -1  199.68    4.10
  -3  -2   1  197.58    3.90
  -4   2   1  928.51   14.60
  -4   2   1  921.61   14.50
  -4   2   1  909.51   14.80
   4   2  -1  893.11   14.70
  -4  -2  -1  901.01   14.40
  -4  -2  -1  893.81   14.60
   4   2  -1  909.81   14.60
   4  -2   1  894.21   14.60
   4  -2   1  898.41   14.20
  -4   2  -1  901.51   14.90
   4   2   1  929.31   14.70
  -4  -2   1  884.81   14.70
  -4   2  -1  902.31   14.40
   4  -2  -1  909.91   14.80
  -4  -2   1  919.91   14.10
  -4   2  -1  901.81   14.80
  -4  -2   1  915.91   14.60
   4   2   1  911.81   14.60
   4  -2  -1  894.31   14.30
   4   2   1  916.11   14.70
  -5   2   1   43.60    1.80
  -5  -2  -1   43.30    1.90
  -5  -2  -1   49.10    1.90
   5  -2   1   44.60    1.80
   5   2  -1   44.00    1.80
  -5  -2  -1   43.80    1.70
  -5   2   1   43.00    1.90
   5   2  -1   44.70    1.80
   5  -2   1   44.80    1.60
  -5   2   1   43.10    1.80
  -5   2  -1   42.80    1.60
  -5   2  -1   43.90    2.20
   5  -2  -1   42.60    1.80
   5  -2  -1   42.90    1.60
   5   2   1   46.60    1.80
  -5  -2   1   45.00    1.80
  -5  -2   1   44.40    1.50
   5   2   1   45.10    1.80
  -5   2  -1   47.40    1.90
  -6  -2  -1  113.29    3.10
   6  -2   1  112.89    3.30
   6  -2   1  115.99    3.00
  -6   2   1  111.99    3.50
  -6   2   1  118.79    3.30
  -6   2   1  118.69    3.30
   6   2  -1  116.89    3.40
  -6  -2  -1  111.49    3.30
  -6  -2  -1  113.79    3.40
   6   2   1  111.99    3.30
   6  -2  -1  109.99    3.00
  -6   2  -1  108.29    3.30
   6   2   1  108.29    3.20
  -6  -2   1  107.59    2.80
  -6   2  -1  106.79    3.30
  -6  -2   1  111.09    3.20
  -6   2  -1  110.69    3.10
  -7  -2  -1  102.69    3.40
  -7  -2  -1  102.99    3.30
  -7   2   1  109.79    3.60
  -7   2   1  101.39    3.30
  -7   2   1  104.59    3.20
   7  -2   1  108.09    3.40
   7  -2   1  106.39    3.00
  -7  -2  -1  109.99    3.20
   7   2  -1  103.49    3.30
   7   2  -1  101.79    3.40
  -7   2  -1  103.39    3.20
  -7  -2   1  107.39    2.90
   7   2   1  105.39    3.40
  -7   2  -1  105.79    3.40
   7  -2  -1  107.59    3.40
   7   2   1  106.99    3.40
   7  -2  -1  104.29    3.10
  -7   2  -1  104.29    3.50
  -7  -2   1  104.29    3.40
  -7  -2   1  103.89    3.40
   8   2  -1    2.00    0.70
  -8  -2  -1    2.10    0.60
  -8  -2  -1    1.50    0.60
  -8   2   1    2.90    0.80
  -8   2   1    2.20    0.60
  -8   2   1    3.30    0.90
   8  -2   1    2.80    0.60
  -8  -2  -1    2.50    0.80
   8  -2   1    3.10    0.80
   8   2  -1    1.20    0.50
   8   2   1    2.70    0.70
  -8   2  -1    2.50    0.70
  -8  -2   1    3.10    0.80
  -8   2  -1    2.20    0.60
  -8  -2   1    2.70    0.70
   8   2   1    1.00    0.60
   8  -2  -1    2.50    0.70
  -8   2  -1    1.00    0.70
  -8  -2   1    3.90    0.90
   8  -2  -1    1.50    0.50
  -9  -2  -1  473.35    9.30
  -9  -2  -1  457.85    9.90
  -9  -2  -1  456.85    9.70
   9  -2   1  478.45    9.30
  -9   2   1  453.85   10.10
   9   2  -1  467.95    9.80
   9  -2   1  457.05    9.80
  -9   2   1  464.05    9.70
   9   2  -1  454.75    9.70
  -9   2   1  470.05    9.50
  -9   2  -1  460.15    9.50
  -9  -2   1  468.35    9.90
   9   2   1  463.95    9.70
  -9  -2   1  462.35    9.80
  -9   2  -1  455.35    9.70
  -9   2  -1  472.55   10.20
   9   2   1  467.95    9.80
   9  -2  -1  461.55    9.90
   9  -2  -1  455.25    9.30
  -9  -2   1  462.95    8.80
  10  -2   1   50.89    2.40
 -10   2   1   45.50    2.60
 -10  -2  -1   46.50    2.60
 -10   2   1   51.89    2.50
 -10  -2  -1   50.49    2.40
 -10   2   1   55.89    3.00
 -10   2  -1   52.19    2.70
 -10  -2   1   50.89    2.70
 -10  -2   1   48.30    2.20
 -10   2  -1   49.99    2.80
 -10   2  -1   56.19    2.70
 -10  -2   1   48.90    2.70
 -11   2   1   29.10    2.00
 -11  -2  -1   32.60    2.40
 -11   2   1   31.00    2.20
 -11  -2  -1   26.60    2.20
 -11   2   1   28.20    2.40
 -11  -2   1   29.00    1.70
 -11   2  -1   30.10    2.10
 -11   2  -1   28.90    2.10
 -11  -2   1   30.00    2.30
 -11   2  -1   29.80    2.40
 -11  -2   1   31.30    2.30
 -12   2   1   53.79    3.00
 -12  -2  -1   48.90    2.60
 -12   2   1   44.70    3.00
 -12   2   1   47.80    2.70
 -12  -2  -1   49.30    3.00
 -12  -2   1   42.10    2.30
 -12  -2   1   44.90    2.90
 -12   2  -1   41.80    3.00
 -12  -2   1   44.80    2.80
 -12   2  -1   49.70    2.80
 -12   2  -1   42.90    2.70
 -13   2   1    9.10    1.60
 -13   2   1    9.70    1.50
 -13  -2  -1    9.40    1.80
 -13   2   1    9.40    2.80
 -13   2  -1    7.50    1.40
 -13  -2   1    9.10    1.40
 -13  -2   1    7.50    1.30
 -13   2  -1    7.40    1.40
 -13  -2   1    9.40    1.70
 -13   2  -1    6.70    1.90
   0   3   1 5382.86  118.29
   0  -3  -1 5295.67  131.29
   0  -3   1 5194.08  108.09
   0   3  -1 5328.47  109.09
  -1   3   1 1718.33   25.90
  -1  -3  -1 1712.13   25.80
  -1   3  -1 1776.52   25.80
   1  -3  -1 1709.03   25.90
  -1  -3   1 1726.63   25.50
   1   3   1 1700.23   26.00
   2  -3   1  837.22   13.60
  -2  -3  -1  843.02   13.20
   2  -3   1  860.01   13.10
   2   3  -1  816.62   13.00
  -2   3   1  856.81   13.00
  -2   3   1  813.62   13.30
  -2   3   1  822.72   13.40
   2  -3   1  822.52   12.60
  -2  -3  -1  808.52   13.20
  -2   3   1  836.82   13.00
   2   3  -1  856.51   13.00
   2  -3  -1  834.72   13.40
  -2   3  -1  835.82   12.90
   2  -3  -1  839.62   13.00
  -2  -3   1  832.32   13.00
   2   3   1  860.31   13.10
  -2   3  -1  840.32   13.60
   2  -3  -1  834.52   12.90
   2  -3  -1  849.72   13.60
  -2  -3   1  841.02   13.10
   2   3   1  833.62   13.30
  -2   3  -1  837.82   13.30
  -3  -3  -1  347.57    6.30
   3   3  -1  346.57    6.10
  -3  -3  -1  345.97    6.30
  -3   3   1  340.97    6.50
   3   3  -1  349.77    6.30
   3   3  -1  345.07    6.40
   3  -3   1  348.67    5.80
   3   3  -1  342.47    6.20
  -3   3   1  344.37    6.50
   3  -3   1  342.77    5.90
   3  -3   1  350.56    6.30
  -3   3   1  353.36    6.20
  -3  -3   1  349.67    6.30
   3   3   1  361.56    6.50
   3  -3  -1  357.86    6.10
   3   3   1  349.67    6.40
   3  -3  -1  362.66    6.70
  -3   3  -1  359.96    6.80
   3  -3  -1  360.06    6.30
   3   3   1  362.86    6.60
  -3   3  -1  354.06    6.60
  -3  -3   1  360.96    6.20
  -3   3  -1  356.26    6.20
   3  -3  -1  354.46    6.60
   4   3  -1  160.08    3.40
   4   3  -1  151.48    3.80
   4  -3   1  165.68    3.70
  -4   3   1  155.28    3.60
  -4  -3  -1  160.78    3.60
   4   3  -1  160.48    3.60
  -4  -3  -1  161.18    3.80
  -4   3   1  164.98    3.90
   4  -3   1  158.08    3.30
  -4   3   1  157.48    3.90
  -4   3  -1  160.48    3.50
   4  -3  -1  153.38    3.80
   4  -3  -1  164.88    3.60
  -4   3  -1  160.28    3.90
   4  -3  -1  161.68    3.80
  -4   3  -1  163.98    4.00
  -4  -3   1  161.08    3.60
  -4  -3   1  163.18    3.40
   4   3   1  162.08    3.80
   4  -3  -1  154.68    3.40
   4   3   1  154.28    4.80
   5  -3   1  363.86    6.60
  -5  -3  -1  349.17    7.20
   5   3  -1  358.36    7.20
  -5   3   1  360.46    7.20
   5  -3   1  374.16    7.10
  -5   3   1  354.16    7.30
  -5   3   1  374.46    7.00
   5   3  -1  369.76    7.10
  -5  -3  -1  370.06    6.90
  -5   3  -1  367.26    7.40
  -5  -3   1  359.56    7.10
   5   3   1  371.86    7.20
   5   3   1  363.56    7.30
  -5   3  -1  362.56    6.90
   5  -3  -1  369.16    6.80
   5  -3  -1  375.56    7.40
  -5  -3   1  364.96    6.60
  -5   3  -1  396.66    8.50
   6  -3   1   14.40    1.00
   6   3  -1   13.20    1.10
  -6   3   1   14.10    1.20
   6   3  -1   15.00    1.20
  -6   3   1   13.10    1.10
  -6  -3  -1   15.80    1.30
   6  -3   1   14.50    1.10
  -6  -3  -1   16.60    1.20
  -6   3   1   15.50    1.10
   6   3   1   14.90    1.20
   6   3   1   14.70    1.20
  -6  -3   1   15.80    1.20
  -6   3  -1   14.60    1.00
   6  -3  -1   14.50    1.20
   6   3   1   14.30    1.10
   6  -3  -1   16.50    1.10
  -6   3  -1   14.40    1.20
  -6   3  -1   16.30    1.30
  -6  -3   1   14.70    1.20
  -6  -3   1   14.40    1.00
   7  -3   1   45.00    2.10
   7   3  -1   45.60    2.20
  -7   3   1   45.90    2.10
  -7  -3  -1   42.20    2.10
   7   3  -1   48.20    2.20
  -7   3   1   45.40    2.10
  -7   3   1   41.90    2.20
  -7  -3  -1   46.90    2.00
   7  -3   1   48.10    1.90
  -7   3  -1   50.59    2.30
  -7   3  -1   48.30    2.30
  -7  -3   1   48.30    2.20
   7  -3  -1   45.00    1.90
   7   3   1   46.10    2.10
  -7  -3   1   44.60    1.80
   7  -3  -1   46.80    2.20
  -7   3  -1   42.20    2.00
   7   3   1   50.39    2.20
  -7  -3   1   45.90    2.20
   7   3   1   46.20    2.20
  -8   3   1   32.30    1.90
  -8  -3  -1   32.00    1.70
  -8  -3  -1   32.00    2.00
  -8   3   1   32.50    2.10
  -8   3   1   27.10    1.80
   8  -3   1   31.10    1.60
   8  -3   1   31.30    1.90
   8  -3  -1   33.20    1.70
  -8  -3   1   31.30    2.00
  -8   3  -1   34.60    2.10
  -8   3  -1   29.70    2.00
  -8  -3   1   30.00    1.90
   8   3   1   32.50    2.00
   8   3   1   31.50    1.90
   8   3   1   34.00    2.00
  -8  -3   1   31.60    1.60
  -8   3  -1   31.10    1.80
   9   3  -1   40.50    2.30
   9  -3   1   42.20    2.30
   9  -3   1   42.50    2.10
  -9   3   1   44.30    2.40
  -9   3   1   44.30    2.60
  -9  -3  -1   43.60    2.10
   9   3  -1   45.20    2.40
  -9  -3  -1   42.30    2.40
  -9   3   1   43.50    2.40
  -9   3  -1   43.50    2.30
  -9   3  -1   40.00    2.30
  -9  -3   1   42.50    2.40
  -9  -3   1   38.60    2.30
  -9   3  -1   39.60    2.50
   9  -3  -1   44.00    2.10
   9  -3  -1   41.80    2.40
   9   3   1   36.70    2.20
  -9  -3   1   42.40    2.00
 -10   3   1    8.70    1.50
 -10  -3  -1   10.60    1.30
 -10   3   1    8.60    1.30
  10  -3   1    9.00    1.20
 -10  -3   1   10.90    1.20
 -10   3  -1    9.50    1.40
 -10   3  -1    9.70    1.40
 -10  -3   1    8.20    1.40
 -10   3  -1    5.80    1.30
 -10  -3   1    8.60    1.30
 -11   3   1   49.00    2.80
 -11  -3  -1   50.99    3.00
 -11  -3  -1   43.10    2.30
 -11   3   1   45.30    2.90
 -11   3   1   49.99    2.70
 -11   3  -1   47.10    2.90
 -11  -3   1   47.50    2.80
 -11  -3   1   43.20    2.10
 -11   3  -1   45.80    2.60
 -11   3  -1   46.70    2.70
 -12   3   1    0.90    0.70
 -12   3   1    1.10    0.80
 -12   3   1    0.60    0.70
 -12  -3  -1   -0.10    0.60
 -12  -3  -1   -1.10    0.70
 -12   3  -1    0.40    0.90
 -12  -3   1   -0.10    0.70
 -12   3  -1    0.60    0.70
 -12   3  -1    0.50    0.70
 -12  -3   1    0.60    0.60
 -13   3   1   84.69    4.00
 -13  -3  -1   84.49    4.20
 -13   3   1   77.69    3.60
 -13   3   1   83.79    4.40
 -13   3  -1   81.49    3.80
 -13   3  -1   83.99    3.90
 -13   3  -1   77.19    4.10
 -13  -3   1   77.89    4.00
 -13  -3   1   77.89    3.20
   0  -4  -1  570.84    9.90
   0   4   1  577.74    9.90
   0   4   1  589.74    9.80
   0  -4  -1  596.84    9.30
   0   4   1  605.74    9.30
   0  -4   1  576.54    9.20
   0   4  -1  588.44    9.00
   0   4  -1  582.34    9.50
   0  -4  -1  600.74    9.70
   0  -4   1  569.54    9.80
   0   4  -1  570.84    9.80
   0  -4   1  559.24    9.00
   1   4  -1  257.47    5.00
  -1   4   1  250.27    4.60
   1  -4   1  252.17    4.20
  -1  -4  -1  258.67    4.70
  -1   4   1  259.17    5.20
  -1  -4  -1  250.57    4.90
  -1   4   1  252.07    5.00
   1  -4   1  267.37    4.60
   1   4  -1  250.57    4.40
   1  -4   1  261.97    5.20
  -1  -4  -1  259.07    5.10
  -1   4  -1  268.47    4.90
  -1  -4   1  254.97    4.60
   1  -4  -1  260.07    5.20
   1  -4  -1  258.27    4.60
  -1  -4   1  261.77    5.00
  -1   4  -1  258.47    4.40
  -1  -4   1  261.17    4.60
   1   4   1  259.37    5.10
   1  -4  -1  267.37    5.00
   1   4   1  256.97    4.60
  -2  -4  -1  209.78    4.40
  -2   4   1  212.78    4.50
   2  -4   1  212.28    3.70
   2  -4   1  214.28    4.10
   2   4  -1  211.28    4.00
  -2   4   1  197.98    4.50
  -2   4   1  205.08    4.00
   2  -4   1  205.38    4.60
  -2   4   1  207.58    4.00
   2   4  -1  210.28    4.30
  -2  -4  -1  217.38    4.30
  -2   4  -1  207.08    4.30
  -2   4  -1  206.28    3.80
   2  -4  -1  203.18    4.30
   2   4   1  210.08    4.40
   2   4   1  206.48    4.00
  -2  -4   1  201.98    4.20
   2  -4  -1  206.58    3.90
   2  -4  -1  199.98    4.50
  -2  -4   1  208.98    3.90
  -2  -4   1  202.38    4.00
  -3  -4  -1  260.07    5.20
   3  -4   1  251.97    4.60
   3   4  -1  262.37    5.00
   3   4  -1  257.97    5.30
   3  -4   1  259.77    5.70
  -3   4   1  259.87    5.00
  -3   4   1  256.17    5.40
  -3  -4  -1  259.87    5.10
   3  -4   1  263.47    5.10
  -3   4   1  255.07    5.50
   3   4  -1  255.77    5.00
  -3   4  -1  262.47    5.60
   3   4   1  259.67    5.30
   3   4   1  269.77    5.10
  -3  -4   1  256.77    5.00
   3  -4  -1  266.87    5.40
  -3   4  -1  264.27    5.40
   3  -4  -1  260.47    4.80
   3  -4  -1  263.47    5.60
   3  -4  -1  262.27    4.90
  -3   4  -1  263.67    4.90
  -3  -4   1  263.07    5.10
  -4   4   1  624.74   10.50
  -4  -4  -1  622.64   10.70
  -4  -4  -1  622.14   10.60
   4   4  -1  615.24   10.60
   4   4  -1  615.14   10.40
  -4   4   1  609.74   11.00
   4  -4   1  609.74   10.00
   4   4  -1  608.44   10.90
   4  -4   1  601.14   10.10
  -4   4   1  622.24   11.10
   4  -4   1  632.24   10.60
  -4   4  -1  623.04   10.20
  -4  -4   1  605.24   10.20
  -4  -4   1  598.04   10.30
   4   4   1  611.54   10.60
   4  -4  -1  603.94   10.70
  -4   4  -1  608.24   11.00
   4   4   1  611.44   10.50
   4   4   1  623.44   10.90
   4  -4  -1  606.34   10.30
  -4   4  -1  604.84   11.00
   4  -4  -1  610.64   11.00
   4  -4  -1  621.44   10.10
  -5   4   1   49.40    2.20
  -5   4   1   50.79    1.90
   5   4  -1   51.89    1.90
   5   4  -1   50.19    2.00
   5  -4   1   49.10    1.80
  -5   4   1   48.60    2.10
   5  -4   1   50.39    2.00
  -5  -4  -1   53.99    2.10
   5   4  -1   51.99    2.10
   5   4  -1   52.09    2.00
   5  -4  -1   50.99    1.80
  -5   4  -1   53.29    2.20
   5  -4  -1   50.19    2.10
   5   4   1   51.59    2.10
   5  -4  -1   51.19    1.90
  -5  -4   1   50.09    1.80
  -5  -4   1   51.29    1.90
   5   4   1   54.49    2.10
  -5   4  -1   50.89    2.20
  -6   4   1   21.50    1.50
   6   4  -1   23.30    1.40
   6  -4   1   22.60    1.40
  -6  -4  -1   23.70    1.40
   6   4  -1   22.40    1.40
  -6   4   1   17.80    1.40
   6   4  -1   20.30    1.40
  -6  -4  -1   21.50    1.50
  -6   4   1   25.10    1.40
   6  -4   1   21.50    1.20
  -6  -4   1   23.50    1.30
  -6   4  -1   24.50    1.60
   6   4   1   19.80    1.30
   6  -4  -1   24.70    1.40
  -6   4  -1   20.90    1.30
  -6  -4   1   21.50    1.40
   6  -4  -1   23.20    1.50
   6  -4  -1   22.50    1.20
  -6   4  -1   20.50    1.50
   6   4   1   18.40    1.40
   7   4  -1   41.50    2.20
  -7  -4  -1   46.10    2.00
  -7   4   1   47.10    2.30
  -7   4   1   47.40    2.40
   7  -4   1   44.80    1.80
   7   4  -1   45.20    2.20
   7  -4   1   41.30    2.10
   7   4  -1   45.30    2.20
  -7   4   1   43.40    2.10
  -7  -4  -1   40.20    2.10
  -7  -4   1   45.20    2.10
   7  -4  -1   45.20    2.10
   7   4   1   45.30    2.20
  -7   4  -1   44.50    2.00
  -7   4  -1   45.80    2.30
  -7  -4   1   50.49    1.90
   7  -4  -1   45.60    1.90
   7   4   1   42.60    2.20
  -7   4  -1   47.60    2.40
   7  -4  -1   45.10    2.20
   8  -4   1  141.89    4.50
  -8   4   1  149.79    4.80
  -8  -4  -1  147.29    4.10
   8   4  -1  142.59    4.40
  -8  -4  -1  147.89    4.50
   8   4  -1  141.39    4.50
  -8   4   1  143.59    4.30
   8  -4   1  147.39    3.90
  -8   4   1  148.39    4.50
   8   4  -1  150.38    4.50
   8   4   1  146.69    4.50
   8  -4  -1  151.68    4.10
  -8  -4   1  143.29    3.80
  -8   4  -1  154.08    4.30
   8  -4  -1  149.99    4.60
   8   4   1  146.89    4.40
  -8  -4   1  140.59    4.30
  -8   4  -1  148.49    4.80
  -8   4  -1  150.48    4.70
  -9   4   1   20.40    1.70
   9  -4   1   19.30    1.60
  -9  -4  -1   21.60    1.50
  -9  -4  -1   20.80    1.80
  -9   4   1   21.00    1.70
   9  -4  -1   20.00    1.50
  -9  -4   1   22.20    1.40
  -9   4  -1   24.20    1.90
  -9  -4   1   22.40    1.80
  -9   4  -1   20.60    1.60
  -9   4  -1   21.30    2.90
 -10   4   1  132.89    4.90
  10  -4   1  124.89    4.00
 -10  -4  -1  132.89    4.80
 -10   4   1  129.49    4.50
 -10   4   1  126.69    4.40
 -10  -4  -1  129.79    4.00
 -10  -4   1  127.99    4.50
 -10   4  -1  129.89    4.40
 -10  -4   1  126.69    3.70
 -10   4  -1  132.69    4.70
 -10   4  -1  126.99    4.80
 -11   4   1   10.70    1.60
 -11  -4  -1   11.80    1.30
 -11   4   1   10.80    1.60
 -11  -4  -1   13.40    1.80
 -11   4   1   13.20    2.00
 -11   4  -1   11.40    1.80
 -11   4  -1   11.30    1.60
 -11  -4   1   11.50    1.20
 -11  -4   1   15.50    1.70
 -11   4  -1   11.20    1.60
 -12   4   1   79.89    4.20
 -12   4   1   86.79    3.80
 -12  -4  -1   87.39    4.20
 -12   4   1   85.99    3.90
 -12  -4  -1   89.29    4.10
 -12   4  -1   77.09    4.10
 -12   4  -1   80.79    3.80
 -12  -4   1   83.99    3.90
  12  -4  -1   82.29    3.80
 -12   4  -1   87.39    3.80
 -13   4   1    1.40    0.90
 -13   4   1    2.30    1.00
 -13   4   1    1.60    1.00
 -13  -4  -1    2.80    1.20
  13  -4  -1    0.60    0.90
 -13   4  -1    2.90    1.10
 -13  -4   1    1.70    1.10
 -13   4  -1    2.10    1.20
 -13   4  -1    1.40    0.80
   0   5   1 2834.02   42.90
   0  -5  -1 2898.91   42.50
   0   5   1 2890.71   42.90
   0   5  -1 2847.02   41.80
   0   5   1 2795.02   42.00
   0   5  -1 2866.61   42.50
   0  -5  -1 2801.82   42.90
  -1   5   1  157.78    3.30
  -1  -5  -1  163.18    3.90
   1  -5   1  161.18    3.40
  -1  -5  -1  162.28    3.70
  -1  -5  -1  165.08    3.50
   1  -5   1  160.08    3.00
   1  -5   1  161.68    4.50
  -1   5   1  166.68    3.90
  -1   5   1  164.48    4.00
   1   5  -1  159.48    3.80
   1   5  -1  162.28    3.20
   1  -5  -1  162.98    3.70
  -1  -5   1  163.18    3.40
  -1   5  -1  155.68    3.90
   1  -5  -1  166.08    3.30
  -1  -5   1  163.38    3.30
  -1   5  -1  163.78    3.70
  -1  -5   1  156.68    3.80
  -1   5  -1  163.08    3.10
   1   5   1  162.68    3.30
   1   5   1  161.08    3.90
   2  -5   1 1220.88   20.10
   2  -5   1 1262.97   19.30
  -2   5   1 1217.38   19.10
  -2  -5  -1 1227.58   19.40
  -2   5   1 1245.68   19.90
  -2  -5  -1 1279.67   19.70
   2   5  -1 1233.88   19.10
  -2  -5  -1 1254.27   19.80
  -2   5   1 1215.78   20.90
   2   5  -1 1232.48   19.60
   2  -5   1 1257.07   18.70
  -2   5   1 1256.57   19.20
   2   5   1 1222.28   19.20
  -2  -5   1 1245.28   19.70
  -2   5  -1 1195.28   18.80
   2  -5  -1 1270.97   19.00
   2  -5  -1 1255.07   19.60
   2   5   1 1232.48   19.80
  -2  -5   1 1243.58   19.00
  -2   5  -1 1244.08   19.00
  -2   5  -1 1262.17   19.70
  -2  -5   1 1247.38   19.20
   2  -5  -1 1251.27   20.10
  -3   5   1  320.67    6.70
   3  -5   1  331.57    6.20
  -3   5   1  317.57    6.60
   3   5  -1  327.07    6.00
  -3  -5  -1  318.17    6.20
   3  -5   1  318.97    5.60
   3  -5   1  324.77    6.90
   3   5  -1  315.87    6.20
  -3   5  -1  323.47    6.50
  -3  -5   1  314.17    5.90
   3  -5  -1  324.67    5.90
   3   5   1  326.57    6.50
   3   5   1  323.27    6.10
  -3  -5   1  305.77    6.00
  -3  -5   1  323.37    6.20
  -3   5  -1  332.97    5.90
   3  -5  -1  324.77    6.80
   4  -5   1  323.17    7.10
  -4   5   1  322.87    6.30
   4   5  -1  318.77    6.30
   4  -5   1  329.17    5.90
  -4   5   1  321.87    6.90
  -4  -5  -1  324.07    6.50
   4   5  -1  326.17    6.80
  -4   5   1  319.77    6.80
   4   5  -1  321.77    6.30
   4  -5  -1  309.27    6.00
  -4  -5   1  325.07    6.20
  -4   5  -1  313.47    6.10
  -4   5  -1  315.27    6.90
   4  -5  -1  320.87    6.00
  -4  -5   1  329.07    6.30
  -4   5  -1  329.17    6.70
   4  -5  -1  324.27    7.00
   4  -5  -1  317.67    6.60
   4   5   1  318.87    6.30
   4   5   1  325.97    6.80
   4   5   1  324.67    7.20
  -5   5   1  591.04   10.60
  -5   5   1  579.04   11.10
   5   5  -1  605.54   10.70
   5   5  -1  592.54   10.50
   5  -5   1  600.54   10.00
   5  -5   1  605.44   10.70
   5  -5   1  591.64   10.10
  -5   5   1  606.64   11.30
  -5  -5  -1  592.64   10.60
   5   5  -1  589.84   11.10
  -5  -5  -1  594.14   10.80
   5  -5  -1  595.34   10.10
   5  -5  -1  602.14   11.30
   5   5   1  591.04   11.10
  -5   5  -1  602.44   10.40
   5  -5  -1  575.74   10.40
  -5  -5   1  573.54   10.60
  -5   5  -1  597.74   11.30
   5   5   1  608.24   10.60
   5  -5  -1  609.24   11.00
  -5  -5   1  568.44   11.00
  -5   5  -1  593.24   11.10
   5   5   1  597.44   10.80
  -6   5   1   11.30    1.10
   6  -5   1   13.00    1.00
  -6   5   1   11.20    1.20
   6   5  -1   12.50    1.10
  -6   5   1   12.30    1.30
   6  -5   1   10.10    1.20
   6  -5   1   12.40    0.90
  -6  -5  -1   12.00    1.10
  -6  -5  -1   11.00    1.10
   6  -5  -1   11.90    0.90
   6   5   1   11.60    1.10
  -6  -5   1    9.80    0.90
  -6   5  -1   10.90    1.00
   6  -5  -1   10.50    1.00
  -6   5  -1   12.30    1.30
  -6   5  -1   10.50    1.40
   6  -5  -1   11.10    1.10
   6   5   1   11.40    1.10
  -6  -5   1   11.90    1.10
  -7   5   1   13.50    1.50
   7  -5   1   13.70    1.00
  -7  -5  -1   12.60    1.20
   7   5  -1   12.10    1.60
  -7   5   1   14.30    1.40
   7  -5   1   11.80    1.20
  -7  -5  -1   12.10    1.20
   7   5  -1   12.50    1.90
   7  -5   1   13.60    1.20
  -7   5   1   12.60    1.20
  -7  -5   1   13.90    1.10
  -7  -5   1   14.20    1.30
   7  -5  -1   15.30    1.20
  -7   5  -1   13.40    1.20
   7   5   1   12.00    1.60
  -7   5  -1   13.70    1.40
  -7   5  -1   13.50    1.40
   7  -5  -1   13.70    1.20
   7  -5  -1   14.40    1.40
   7   5   1   14.60    2.40
  -8   5   1    3.70    0.80
   8  -5   1    3.30    0.80
  -8  -5  -1    3.30    0.80
   8  -5   1    5.20    1.00
   8  -5   1    3.90    0.70
  -8   5   1    4.40    1.00
   8   5  -1    4.30    0.90
   8   5  -1    3.10    0.80
  -8   5   1    4.60    1.10
  -8  -5  -1    3.50    0.80
  -8  -5   1    3.60    0.80
   8   5   1    3.90    0.90
   8  -5  -1    3.70    0.70
  -8   5  -1    3.40    1.00
   8   5   1    2.00    0.70
   8  -5  -1    2.50    0.80
   8  -5  -1    2.80    1.00
  -8   5  -1    3.00    0.70
  -8   5  -1    3.70    1.00
  -8  -5   1    3.20    0.90
  -9   5   1  121.09    4.60
   9  -5   1  117.59    4.20
  -9   5   1  125.19    4.40
  -9  -5  -1  120.79    4.30
   9  -5   1  123.49    3.90
  -9   5   1  113.49    4.00
  -9  -5  -1  114.59    3.70
   9  -5   1  120.39    3.60
  -9   5  -1  108.59    4.20
  -9  -5   1  117.69    3.50
   9  -5  -1  112.29    3.60
  -9   5  -1  116.29    4.50
  -9  -5   1  116.99    4.00
   9  -5  -1  122.09    4.00
  -9   5  -1  119.69    4.00
 -10   5   1   39.30    2.70
 -10  -5  -1   42.30    2.60
 -10   5   1   43.50    2.50
 -10  -5  -1   45.60    2.70
  10  -5   1   42.80    2.40
 -10   5   1   42.20    2.60
 -10   5  -1   43.90    2.80
 -10   5  -1   44.60    2.70
 -10  -5   1   48.10    2.60
 -10  -5   1   45.60    2.10
 -11   5   1   12.50    2.00
 -11   5   1   11.40    1.80
 -11   5   1    8.60    1.40
 -11  -5  -1   12.80    1.80
 -11  -5  -1   10.60    1.40
  11  -5   1   11.20    1.50
  11  -5  -1    9.50    1.40
 -11   5  -1   12.00    1.90
 -11   5  -1   11.80    1.60
 -11  -5   1   11.50    1.30
 -11  -5   1    9.30    1.60
 -11   5  -1   12.30    1.80
 -12   5   1    6.50    1.30
 -12  -5  -1    6.40    1.30
 -12   5   1    4.60    1.10
  12  -5   1    3.90    1.10
 -12   5   1    3.90    1.40
 -12   5  -1    5.90    1.80
 -12   5  -1    7.40    1.40
 -12  -5   1    4.90    1.10
  12  -5  -1    5.90    1.30
 -12   5  -1    4.50    1.20
 -12  -5   1    5.20    1.30
   0  -6  -1  903.01   15.40
   0  -6  -1  895.71   14.30
   0   6   1  930.31   15.40
   0  -6  -1  939.91   14.90
   0  -6   1  908.41   15.30
   0   6  -1  904.81   15.30
   0   6   1  906.71   14.30
   0   6  -1  894.11   14.90
   0  -6   1  887.81   14.30
   0  -6   1  890.41   14.10
   0   6  -1  891.81   14.00
   0   6   1  909.91   16.10
   1  -6   1   67.89    1.70
  -1  -6  -1   65.99    2.40
   1  -6   1   66.09    2.00
  -1   6   1   64.69    2.80
  -1  -6  -1   67.49    2.00
  -1   6   1   66.79    1.90
  -1  -6  -1   72.19    2.30
   1   6  -1   66.49    1.80
   1   6  -1   63.89    2.40
   1  -6   1   67.39    2.50
  -1   6   1   65.79    2.50
   1  -6  -1   68.69    2.60
  -1   6  -1   67.39    1.80
  -1  -6   1   67.99    2.00
   1   6   1   68.29    2.00
  -1  -6   1   66.49    2.40
   1   6   1   67.69    2.50
   1  -6  -1   70.99    1.90
  -1  -6   1   67.39    1.90
   1  -6  -1   69.69    2.30
  -1   6  -1   68.49    2.30
  -2  -6  -1  273.47    5.60
  -2   6   1  278.97    5.30
  -2  -6  -1  262.57    5.80
   2   6  -1  268.47    5.10
  -2   6   1  267.27    6.00
   2  -6   1  267.57    6.10
  -2   6   1  255.37    5.80
   2  -6   1  272.97    4.70
  -2   6   1  262.27    5.10
   2  -6   1  269.17    5.30
  -2  -6  -1  263.27    5.40
   2   6   1  265.07    5.90
   2  -6  -1  271.07    5.00
  -2   6  -1  262.17    4.90
  -2   6  -1  263.87    6.10
  -2   6  -1  264.37    5.20
   2  -6  -1  279.97    6.20
   2   6   1  275.17    5.30
  -2   6  -1  273.27    5.70
  -2  -6   1  267.57    5.20
  -2  -6   1  280.47    5.80
  -2  -6   1  278.87    5.20
  -3   6   1  117.69    3.60
   3  -6   1  119.29    2.60
  -3   6   1  116.69    3.00
  -3  -6  -1  113.69    3.10
  -3   6   1  112.99    2.90
  -3  -6  -1  122.79    3.30
  -3  -6  -1  121.49    3.40
  -3   6   1  120.99    3.60
   3   6  -1  116.29    3.80
   3  -6   1  120.59    3.10
  -3  -6  -1  118.29    3.30
   3  -6   1  115.69    3.70
   3   6  -1  120.79    3.00
   3  -6  -1  115.89    2.80
   3  -6  -1  117.79    3.30
   3   6   1  122.39    3.50
  -3  -6   1  116.19    2.90
  -3  -6   1  114.09    3.00
  -3   6  -1  115.29    3.40
  -3  -6   1  117.29    3.30
   3  -6  -1  117.69    3.70
   3   6   1  116.19    3.00
  -3   6  -1  111.39    3.60
  -3   6  -1  116.19    2.90
  -4   6   1  205.28    5.30
  -4  -6  -1  207.58    4.90
   4  -6   1  210.28    5.50
   4   6  -1  208.48    5.20
  -4  -6  -1  212.58    4.80
  -4   6   1  214.18    4.70
  -4   6   1  203.98    5.20
   4  -6   1  200.38    4.10
   4  -6   1  204.98    4.70
   4   6  -1  202.58    4.60
   4   6  -1  209.98    4.90
   4   6   1  206.88    5.00
   4  -6  -1  223.58    5.10
  -4  -6   1  215.38    4.70
  -4   6  -1  208.88    5.10
  -4   6  -1  209.68    5.40
  -4  -6   1  212.88    4.90
   4   6   1  212.28    4.70
   4  -6  -1  204.88    4.40
  -4   6  -1  208.98    4.60
   4  -6  -1  214.68    5.50
  -4  -6   1  207.48    4.60
  -5  -6  -1  246.88    5.60
  -5   6   1  247.48    6.10
  -5   6   1  239.68    6.10
   5  -6   1  242.88    5.00
   5   6  -1  246.18    5.50
   5   6  -1  245.98    5.90
  -5  -6  -1  243.58    5.60
  -5   6   1  248.68    5.50
   5   6  -1  242.38    5.40
   5  -6   1  240.58    5.50
  -5   6  -1  230.78    6.00
  -5  -6   1  240.08    5.30
   5  -6  -1  239.48    5.10
  -5  -6   1  250.47    5.40
   5   6   1  240.58    5.40
  -5   6  -1  243.78    5.30
   5  -6  -1  242.78    5.70
   5   6   1  232.58    5.80
   5  -6  -1  251.37    6.20
   5   6   1  238.28    5.70
  -5   6  -1  239.98    5.90
  -6  -6  -1  307.17    6.60
  -6  -6  -1  300.57    6.70
   6  -6   1  299.57    6.00
   6  -6   1  313.07    6.70
   6   6  -1  303.47    6.60
  -6   6   1  297.27    6.60
   6   6  -1  303.87    6.60
   6  -6   1  300.57    6.10
   6   6  -1  306.47    7.20
  -6   6   1  295.07    7.20
  -6   6   1  295.77    7.20
  -6  -6   1  309.17    6.40
  -6  -6   1  280.57    6.20
  -6   6  -1  299.87    6.40
   6   6   1  285.47    6.60
  -6   6  -1  286.27    7.10
  -6   6  -1  296.67    7.00
   6   6   1  295.97    6.50
   6  -6  -1  292.17    6.70
   6  -6  -1  304.87    6.10
   6   6   1  298.67    7.20
   6  -6  -1  294.17    6.20
   7  -6   1  107.29    3.00
  -7  -6  -1  114.09    3.70
   7  -6   1  109.99    3.30
  -7   6   1  112.39    4.00
  -7   6   1  106.89    3.60
   7  -6   1  114.59    3.70
  -7  -6  -1  108.29    3.50
   7   6  -1  112.79    3.70
   7   6  -1  108.39    3.90
  -7   6   1  111.49    4.10
   7   6   1  106.39    3.60
   7  -6  -1   99.99    3.10
  -7  -6   1  116.59    3.40
  -7   6  -1  122.59    4.20
  -7   6  -1  109.69    3.50
   7  -6  -1  115.69    3.40
  -7  -6   1  110.49    3.50
   7   6   1  106.69    3.90
  -7   6  -1  116.19    4.20
   7  -6  -1   99.29    4.50
  -8  -6  -1  156.18    4.50
  -8  -6  -1  165.88    4.90
  -8   6   1  167.28    5.20
   8  -6   1  169.78    4.40
   8  -6   1  169.48    4.90
  -8   6   1  165.08    4.80
   8  -6   1  162.38    4.10
  -8   6  -1  162.08    5.40
  -8   6  -1  165.88    4.70
   8  -6  -1  161.28    4.90
   8  -6  -1  168.28    4.60
  -8   6  -1  173.08    5.40
  -8  -6   1  165.08    4.40
  -8  -6   1  167.28    4.70
   8  -6  -1  157.98    4.20
   9  -6   1   71.39    2.60
  -9   6   1   72.59    3.60
  -9   6   1   70.79    3.60
  -9  -6  -1   72.79    2.90
  -9   6   1   71.29    3.40
  -9  -6  -1   71.69    3.20
   9  -6   1   73.19    2.90
  -9   6  -1   75.29    3.60
   9  -6  -1   74.79    3.00
  -9  -6   1   68.09    2.70
  -9   6  -1   73.19    3.10
  -9  -6   1   68.59    3.00
  -9   6  -1   73.19    3.80
 -10   6   1   88.79    3.80
 -10  -6  -1   85.29    3.40
 -10   6   1   85.79    4.10
  10  -6   1   81.89    3.20
 -10   6   1   87.69    3.70
 -10  -6  -1   84.89    3.70
  10  -6  -1   91.39    3.50
 -10   6  -1   88.19    4.00
 -10  -6   1   84.29    3.10
 -10   6  -1   89.89    3.60
 -10   6  -1   85.99    4.00
 -10  -6   1   87.39    3.60
 -11   6   1    3.20    1.00
  11  -6   1    2.30    0.90
 -11   6   1    2.60    0.90
 -11  -6  -1    3.40    1.00
 -11  -6  -1    2.50    0.80
 -11   6   1    3.70    1.30
  11  -6  -1    1.90    0.80
 -11   6  -1    2.50    1.00
 -11   6  -1    3.40    1.00
 -11  -6   1    3.40    1.00
 -11   6  -1    3.00    1.00
 -12   6   1  116.99    4.60
 -12   6   1  117.59    5.20
 -12   6   1  111.19    4.70
  12  -6   1  116.39    4.40
 -12  -6  -1  120.69    4.80
 -12   6  -1  113.89    4.50
  12  -6  -1  118.29    4.50
 -12   6  -1  113.89    4.80
 -12  -6   1  114.59    4.50
 -12  -6   1  114.89    3.90
 -12   6  -1  110.59    5.10
   0  -7   1  598.34   10.10
   0  -7  -1  639.24   11.30
   0  -7   1  606.84   11.40
   0   7   1  610.44   11.40
   0   7   1  598.64   10.80
   0   7  -1  631.04   11.40
   0  -7   1  606.74   10.30
   0   7  -1  623.84   11.10
   0   7   1  637.64   11.40
   0   7  -1  602.34   10.00
   0  -7  -1  620.54   11.50
   0  -7  -1  596.64   10.30
   1  -7   1  238.28    4.80
  -1   7   1  248.08    5.80
   1   7  -1  245.48    4.70
  -1   7   1  239.28    4.90
   1   7  -1  245.28    5.70
  -1   7   1  241.58    5.70
   1  -7   1  235.78    4.50
  -1  -7  -1  247.08    5.80
  -1  -7  -1  244.98    5.50
  -1  -7  -1  239.88    5.30
  -1   7  -1  239.98    5.40
   1  -7  -1  241.58    5.80
   1   7   1  247.38    5.70
  -1  -7   1  248.08    5.70
  -1   7  -1  239.58    5.80
  -1   7  -1  237.28    4.60
   1  -7  -1  234.28    5.20
  -1  -7   1  245.98    4.80
   1  -7  -1  240.18    4.70
  -1  -7   1  231.98    4.80
   1   7   1  247.38    4.90
   2  -7   1  109.69    3.70
  -2   7   1  114.59    2.90
  -2   7   1  117.39    3.60
  -2   7   1  110.09    3.70
  -2  -7  -1  117.39    3.30
   2   7  -1  117.19    2.90
   2   7  -1  112.69    3.40
   2  -7   1  114.09    2.60
  -2  -7  -1  117.29    3.60
   2  -7   1  115.89    3.00
  -2   7   1  117.99    3.10
  -2  -7  -1  115.29    3.20
   2  -7  -1  118.09    3.30
  -2   7  -1  109.69    3.60
   2  -7  -1  115.59    2.80
  -2   7  -1  109.39    2.80
  -2  -7   1  111.39    2.80
  -2  -7   1  114.49    3.50
  -2  -7   1  112.59    2.80
  -2   7  -1  107.39    3.30
   2  -7  -1  111.99    3.70
  -2   7  -1  109.59    2.70
   2   7   1  112.89    2.90
   2   7   1  114.39    3.50
  -3  -7  -1   62.99    2.40
  -3   7   1   58.49    2.10
   3  -7   1   58.99    1.70
  -3   7   1   61.69    2.10
  -3  -7  -1   56.69    2.40
   3   7  -1   60.39    2.00
  -3  -7  -1   59.19    2.20
   3   7  -1   61.99    2.40
  -3   7   1   60.39    2.70
  -3  -7  -1   62.29    2.30
   3  -7   1   61.39    2.20
  -3   7   1   58.79    2.60
   3   7   1   61.09    2.10
  -3  -7   1   61.29    2.10
   3  -7  -1   57.29    2.30
  -3   7  -1   57.29    2.40
   3   7   1   59.49    2.50
  -3  -7   1   66.29    2.10
  -3   7  -1   63.89    2.10
   3  -7  -1   59.79    2.70
   3  -7  -1   61.09    1.90
  -3   7  -1   56.79    2.60
  -3  -7   1   58.29    2.40
  -4   7   1   29.80    1.90
   4   7  -1   33.10    1.90
   4  -7   1   27.40    1.50
  -4   7   1   29.40    1.50
   4  -7   1   29.30    1.20
  -4   7   1   27.80    1.80
  -4  -7  -1   26.90    1.70
  -4  -7  -1   29.90    1.60
  -4  -7  -1   29.90    1.70
   4   7  -1   28.80    1.50
   4   7  -1   29.70    1.70
  -4  -7   1   27.90    1.40
   4   7   1   31.50    1.60
  -4   7  -1   25.50    1.80
   4   7   1   28.70    1.80
  -4  -7   1   33.20    1.80
  -4   7  -1   30.50    1.50
  -4   7  -1   30.60    1.80
   4  -7  -1   32.70    1.80
   4  -7  -1   31.10    1.40
   4  -7  -1   34.90    2.10
  -4  -7   1   33.60    1.80
   5  -7   1  101.09    2.80
   5  -7   1  111.29    5.00
  -5   7   1  101.99    3.70
  -5  -7  -1  102.19    3.40
  -5   7   1  101.89    3.20
  -5  -7  -1  101.19    3.30
   5   7  -1   99.89    3.10
   5   7  -1   98.19    3.30
   5  -7   1  104.89    3.20
   5   7  -1  107.59    3.70
  -5   7   1  100.29    3.70
  -5   7  -1  106.99    3.20
   5   7   1   99.29    3.40
  -5   7  -1  108.39    3.70
  -5  -7   1  106.09    3.20
   5  -7  -1  109.39    3.90
  -5  -7   1  103.89    3.10
   5  -7  -1  104.89    3.40
   5  -7  -1  102.09    2.90
   5   7   1  105.29    4.30
  -5   7  -1   98.49    3.80
  -5  -7   1  105.89    3.30
   5   7   1  105.79    3.20
   6  -7   1  108.49    3.00
  -6   7   1  105.79    3.50
   6  -7   1  111.29    3.50
  -6  -7  -1  116.29    3.70
  -6   7   1  120.69    4.20
  -6  -7  -1  116.19    3.70
  -6   7   1  111.59    4.10
   6   7  -1  108.49    3.90
   6   7  -1  108.99    3.60
   6   7  -1  109.59    4.10
   6  -7  -1  117.89    3.80
   6   7   1  111.19    4.00
   6   7   1  112.79    3.80
  -6   7  -1  111.49    4.00
   6   7   1  112.69    3.50
  -6   7  -1  110.79    3.40
  -6  -7   1  108.49    3.40
   6  -7  -1  107.79    3.20
  -6   7  -1  105.19    4.10
  -6  -7   1  112.39    3.50
   7  -7   1  123.49    3.40
  -7  -7  -1  114.59    3.90
   7   7  -1  127.09    3.90
  -7  -7  -1  118.49    3.90
  -7   7   1  117.49    3.90
  -7   7   1  120.69    4.40
   7  -7   1  121.79    3.90
  -7   7   1  121.89    4.50
  -7   7  -1  117.29    4.40
  -7   7  -1  122.29    3.80
   7  -7  -1  126.39    3.60
  -7   7  -1  128.09    4.50
  -7  -7   1  124.29    3.80
  -7  -7   1  125.49    3.80
   7  -7  -1  123.49    4.10
   7   7   1  120.89    3.90
   8  -7   1   12.50    1.10
  -8  -7  -1   13.40    1.40
   8  -7   1   10.70    1.10
  -8  -7  -1   12.70    1.40
  -8   7   1   11.50    1.60
  -8   7   1   11.90    1.40
  -8   7   1   13.30    1.90
   8  -7   1   12.20    1.30
  -8  -7   1   12.70    1.40
  -8   7  -1   12.60    1.60
   8  -7  -1   11.20    1.10
  -8  -7   1   12.00    1.50
   8  -7  -1   10.00    1.20
  -8   7  -1   14.50    1.60
  -8   7  -1   14.90    1.90
  -9   7   1   35.70    2.50
  -9   7   1   39.50    2.80
  -9   7   1   37.80    2.30
   9  -7   1   40.10    2.10
  -9  -7  -1   34.80    2.10
  -9  -7  -1   40.50    2.40
  -9   7  -1   40.10    2.30
  -9   7  -1   36.80    2.60
   9  -7  -1   38.00    2.10
  -9   7  -1   37.60    2.60
  -9  -7   1   35.50    2.20
  -9  -7   1   37.30    2.10
 -10  -7  -1   29.80    2.20
 -10   7   1   30.70    2.50
  10  -7   1   36.60    2.10
 -10   7   1   30.40    2.40
 -10   7   1   34.90    2.30
 -10  -7  -1   30.00    2.10
 -10   7  -1   28.20    2.40
  10  -7  -1   32.80    2.10
 -10  -7   1   34.90    2.20
 -10   7  -1   30.20    2.40
 -10   7  -1   30.50    2.20
 -11  -7  -1   -0.60    0.70
 -11   7   1    0.60    0.70
 -11   7   1    1.20    1.00
 -11   7   1    1.50    0.90
  11  -7   1   -0.10    0.60
 -11  -7   1    1.30    0.80
  11  -7  -1   -0.40    0.60
 -11   7  -1    0.90    0.70
 -11   7  -1    0.50    0.90
 -11   7  -1    0.40    1.00
 -11  -7   1    2.10    0.80
   0   8  -1    9.40    1.20
   0  -8  -1    4.30    0.80
   0   8  -1    3.50    0.80
   0   8   1    5.70    0.70
   0  -8   1    4.40    0.90
   0  -8   1    5.10    0.70
   0   8  -1    4.60    0.60
   0  -8   1    5.30    0.70
   0   8   1    4.40    0.90
   0  -8  -1    7.00    1.00
   0  -8  -1    6.50    0.80
   0   8   1    9.50    1.30
  -1   8   1  449.26    8.20
  -1  -8  -1  439.26    8.30
   1  -8   1  446.56    7.80
  -1   8   1  450.95    9.40
   1  -8   1  449.36    9.50
  -1  -8  -1  455.65    9.40
   1   8  -1  463.75    8.00
   1  -8   1  454.85    8.10
   1   8  -1  445.66    9.20
  -1   8   1  451.65    9.30
  -1  -8  -1  471.85    8.60
  -1  -8   1  455.95    8.10
   1  -8  -1  464.25    9.60
   1   8   1  459.25    8.20
  -1   8  -1  453.95    7.90
  -1  -8   1  454.45    8.30
   1   8   1  464.95    9.40
  -1   8  -1  449.06    9.40
   1  -8  -1  440.26    8.10
  -1   8  -1  435.26    9.00
   1  -8  -1  462.15    8.70
  -1  -8   1  463.85    9.40
  -2  -8  -1   88.89    3.30
  -2   8   1   90.69    2.70
   2  -8   1   89.59    2.30
  -2  -8  -1   92.49    2.90
   2  -8   1   90.69    3.40
   2   8  -1   90.59    2.50
  -2   8   1   94.09    3.50
  -2   8   1   88.19    3.30
  -2   8   1   89.29    2.60
  -2  -8  -1   83.89    2.80
   2   8  -1   90.29    3.20
   2  -8   1   81.99    3.20
   2  -8  -1   96.29    3.60
  -2  -8   1   95.59    2.60
   2  -8  -1   97.89    3.00
  -2  -8   1   97.69    3.40
   2   8   1   98.89    2.80
  -2   8  -1   96.19    3.30
   2  -8  -1   92.79    2.60
  -2   8  -1   94.99    2.70
   2   8   1   93.19    3.40
  -2   8  -1   93.79    3.50
  -2  -8   1  101.29    2.70
  -2   8  -1   93.09    2.50
  -3  -8  -1   16.80    1.20
   3  -8   1   14.60    1.10
  -3   8   1   15.10    1.50
  -3   8   1   15.50    1.20
   3   8  -1   13.80    1.30
   3  -8   1   15.10    0.90
  -3   8   1   14.20    1.10
  -3  -8  -1   15.10    1.30
   3   8  -1   14.30    1.00
  -3  -8  -1   15.50    1.40
  -3   8   1   13.70    1.40
   3  -8  -1   13.50    1.20
  -3  -8   1   15.60    1.10
   3   8   1   14.60    1.40
  -3  -8   1   14.70    1.30
  -3   8  -1   14.50    1.50
  -3   8  -1   14.80    1.10
   3   8   1   17.40    1.10
  -3   8  -1   15.30    1.50
   3  -8  -1   15.60    1.70
  -3  -8   1   14.30    1.00
   3  -8  -1   15.60    1.00
  -4  -8  -1    8.90    1.20
  -4   8   1    7.40    1.00
  -4  -8  -1    9.70    1.30
  -4   8   1    4.70    1.00
   4   8  -1    7.50    1.20
  -4  -8  -1    8.50    1.10
   4  -8   1    7.20    0.70
   4   8  -1    8.60    0.90
  -4   8   1   10.00    1.50
   4  -8   1    8.40    0.90
   4  -8   1   10.00    1.50
   4   8   1    7.60    1.20
  -4  -8   1    8.70    1.10
   4   8   1    6.80    0.90
   4  -8  -1    9.30    1.30
  -4  -8   1    9.10    1.00
  -4  -8   1    8.00    1.20
   4  -8  -1    6.50    1.00
  -4   8  -1    7.80    1.20
  -4   8  -1    9.10    1.00
   4  -8  -1    8.50    0.80
  -4   8  -1    8.20    1.40
  -5  -8  -1    4.90    0.90
  -5  -8  -1    6.00    1.00
   5  -8   1    4.10    0.80
  -5  -8  -1    3.70    0.80
   5  -8   1    4.00    0.70
   5  -8   1    4.20    1.00
  -5   8   1    5.30    1.10
   5   8  -1    4.80    1.00
  -5   8   1    5.30    1.20
  -5   8   1    4.60    0.80
   5   8  -1    4.70    0.80
   5   8  -1    6.00    1.10
  -5   8  -1    5.50    1.20
  -5   8  -1    4.10    0.80
  -5  -8   1    4.20    0.90
   5  -8  -1    5.40    1.30
   5   8   1    6.20    1.10
   5  -8  -1    8.10    1.10
  -5  -8   1    5.70    0.90
   5  -8  -1    5.10    0.80
  -5   8  -1    5.60    1.20
  -5  -8   1    6.90    1.10
   5   8   1    6.20    1.10
  -6   8   1  202.08    5.90
  -6   8   1  195.18    5.90
   6  -8   1  199.68    4.40
   6   8  -1  190.48    5.00
   6   8  -1  203.98    5.40
   6  -8   1  200.98    5.10
  -6  -8  -1  186.18    5.20
  -6  -8  -1  199.08    5.30
  -6  -8  -1  193.78    5.10
  -6   8   1  190.38    5.10
  -6  -8   1  207.08    5.10
  -6  -8   1  207.28    5.30
   6   8   1  197.18    5.60
  -6   8  -1  194.68    5.80
   6  -8  -1  201.28    4.70
   6   8   1  202.88    5.10
  -6   8  -1  207.18    5.20
  -6   8  -1  192.58    6.00
  -6  -8   1  197.88    4.90
   7   8  -1  170.88    5.00
  -7   8   1  174.88    5.60
   7  -8   1  171.28    4.30
  -7   8   1  173.18    5.60
  -7  -8  -1  172.68    5.00
  -7   8   1  170.48    5.00
  -7  -8  -1  175.38    4.90
   7   8   1  178.18    5.20
  -7  -8   1  169.78    4.90
  -7   8  -1  171.38    5.70
  -7  -8   1  176.98    4.80
  -7  -8   1  174.08    4.70
   7  -8  -1  166.48    5.00
  -7   8  -1  171.98    5.50
  -7   8  -1  172.58    4.80
   7  -8  -1  170.18    4.40
  -8  -8  -1   71.19    3.10
   8  -8   1   75.79    2.70
   8  -8   1   66.99    3.00
  -8   8   1   68.39    3.50
  -8  -8  -1   78.69    3.20
  -8   8   1   72.89    3.20
  -8   8   1   72.99    3.70
  -8  -8   1   68.79    2.80
   8  -8  -1   76.39    2.80
  -8   8  -1   74.39    3.70
  -8  -8   1   72.69    3.00
  -8   8  -1   70.99    3.00
  -8   8  -1   68.49    3.50
  -9   8   1    6.30    1.30
   9  -8   1    6.40    1.00
  -9   8   1    5.50    1.20
  -9  -8  -1    7.60    1.30
  -9  -8  -1    6.40    1.40
  -9   8   1    8.40    1.60
  -9   8  -1    7.70    1.60
  -9   8  -1    5.80    1.00
  -9   8  -1    7.60    1.50
  -9  -8   1    8.60    1.30
  -9  -8   1    5.80    1.10
   9  -8  -1    6.50    1.10
 -10   8   1   32.20    2.60
 -10   8   1   27.70    2.20
 -10   8   1   29.70    2.60
 -10  -8  -1   28.80    2.10
 -10  -8   1   27.60    2.00
 -10   8  -1   28.60    2.10
 -10   8  -1   27.80    2.50
 -10   8  -1   30.70    2.50
  10  -8  -1   29.10    2.00
 -10  -8   1   29.20    2.00
  11  -8   1   39.30    2.30
 -11   8   1   44.80    3.20
 -11  -8  -1   44.20    2.70
 -11   8   1   43.90    3.10
 -11   8   1   41.90    2.80
 -11   8  -1   46.80    2.80
 -11   8  -1   42.80    3.10
 -11   8  -1   45.20    3.20
  11  -8  -1   44.40    2.50
 -11  -8   1   41.50    2.60
   0  -9   1  379.46    7.70
   0  -9  -1  387.56    8.70
   0  -9  -1  381.36    7.60
   0   9   1  375.76    7.20
   0   9  -1  372.56    8.20
   0  -9  -1  376.46    7.30
   0   9   1  387.46    8.60
   0   9  -1  382.66    7.00
   0  -9   1  382.96    7.10
   0   9  -1  376.46    8.50
   1  -9   1  152.28    4.80
   1   9  -1  154.58    4.80
  -1  -9  -1  159.58    4.10
   1  -9   1  147.69    4.00
  -1   9   1  152.08    3.80
  -1   9   1  160.88    4.90
   1  -9   1  153.78    3.50
  -1  -9  -1  155.28    4.00
  -1  -9  -1  159.78    4.90
  -1   9   1  159.18    4.80
   1   9  -1  159.28    3.70
  -1  -9   1  154.98    4.80
  -1  -9   1  151.28    3.50
   1  -9  -1  150.48    3.70
  -1   9  -1  145.59    4.50
   1   9   1  149.99    4.70
  -1   9  -1  154.28    4.80
  -1  -9   1  155.68    3.60
  -1  -9   1  154.98    3.80
  -1   9  -1  151.58    3.60
   1   9   1  154.08    3.80
   1  -9  -1  153.18    4.10
   1  -9  -1  147.69    4.80
  -2  -9  -1   50.29    2.20
   2   9  -1   46.20    2.50
   2  -9   1   49.50    1.70
  -2   9   1   50.79    2.10
   2   9  -1   54.19    1.90
  -2  -9  -1   48.90    2.20
   2  -9   1   48.10    2.60
   2  -9   1   50.89    1.90
  -2  -9  -1   45.00    2.60
  -2   9   1   45.40    2.50
  -2   9   1   47.00    2.60
  -2   9   1   48.80    2.00
   2  -9  -1   50.29    2.70
   2   9   1   50.59    2.00
   2   9   1   51.69    2.70
  -2   9  -1   53.49    2.10
   2  -9  -1   54.49    2.30
  -2   9  -1   51.29    2.60
  -2   9  -1   49.30    2.70
  -2  -9   1   46.10    1.80
  -2  -9   1   48.90    2.50
   2  -9  -1   53.19    1.90
  -2  -9   1   50.99    1.90
  -3  -9  -1  199.38    5.60
   3  -9   1  206.08    4.20
  -3   9   1  195.68    4.70
  -3  -9  -1  203.38    4.90
   3  -9   1  214.48    4.80
   3   9  -1  206.88    4.60
  -3   9   1  197.88    5.70
  -3   9   1  200.38    4.90
  -3   9   1  199.68    5.80
   3  -9   1  197.78    5.90
  -3  -9  -1  201.68    5.00
   3   9  -1  199.38    5.50
  -3  -9   1  212.58    4.60
   3  -9  -1  205.38    4.50
   3   9   1  207.38    4.80
   3   9   1  206.78    5.70
  -3   9  -1  209.58    5.70
  -3  -9   1  214.98    5.50
  -3  -9   1  213.78    5.70
  -3   9  -1  205.08    4.90
   3  -9  -1  206.48    6.00
   3  -9  -1  199.88    5.10
  -3   9  -1  213.48    6.10
  -4  -9  -1   25.50    1.60
   4  -9   1   25.90    1.50
   4   9  -1   23.30    1.80
  -4   9   1   27.20    1.70
  -4  -9  -1   28.30    1.90
   4   9  -1   26.40    1.90
  -4   9   1   28.40    2.10
   4  -9   1   27.40    1.40
   4   9  -1   26.80    1.50
  -4  -9  -1   28.60    1.70
  -4   9   1   26.90    2.20
   4  -9  -1   29.90    1.70
   4   9   1   26.10    2.00
   4   9   1   26.30    1.60
  -4   9  -1   23.80    2.00
   4  -9  -1   27.60    1.40
  -4  -9   1   27.00    2.20
  -4   9  -1   27.70    1.60
  -4  -9   1   27.40    1.90
  -4  -9   1   26.50    1.50
  -4   9  -1   26.10    2.00
  -5  -9  -1  117.79    3.70
  -5   9   1  128.09    4.60
  -5   9   1  135.49    6.80
  -5   9   1  123.79    3.90
   5  -9   1  130.19    3.20
  -5  -9  -1  125.49    3.90
   5   9  -1  123.09    4.20
   5  -9   1  125.99    3.70
   5   9  -1  127.29    3.70
  -5  -9  -1  123.49    4.20
  -5   9  -1  132.19    4.50
  -5  -9   1  128.29    3.50
  -5   9  -1  131.39    3.90
   5   9   1  133.29    4.40
   5   9   1  126.69    3.80
   5  -9  -1  128.59    4.00
   5  -9  -1  126.69    3.40
  -5  -9   1  126.59    3.60
  -5   9  -1  125.49    4.80
   6  -9   1  114.69    3.70
   6  -9   1  111.29    3.10
   6   9  -1  116.69    3.70
  -6  -9  -1  111.59    4.00
  -6  -9  -1  109.69    3.80
  -6   9   1  115.49    4.50
  -6  -9  -1  116.59    3.80
  -6   9   1  118.39    3.90
   6   9  -1  108.99    3.90
  -6   9   1  109.99    4.40
  -6  -9   1  112.09    3.40
  -6   9  -1  118.49    4.50
  -6   9  -1  113.79    4.60
   6  -9  -1  115.69    3.30
  -6   9  -1  115.69    3.70
  -6  -9   1  114.99    3.60
   6  -9  -1  110.79    3.90
  -6  -9   1  110.99    3.90
   6   9   1  111.59    4.20
  -7  -9  -1    5.20    1.10
  -7   9   1    5.80    1.10
  -7  -9  -1    5.10    1.10
   7   9  -1    4.80    0.90
  -7   9   1    5.10    1.20
   7  -9   1    5.10    1.00
   7  -9   1    4.40    0.80
  -7  -9  -1    6.20    1.20
  -7   9   1    5.90    1.30
   7  -9  -1    4.30    1.30
   7  -9  -1    4.50    0.80
  -7   9  -1    5.60    1.30
  -7  -9   1    7.00    1.10
  -7  -9   1    6.10    1.00
  -7  -9   1    7.10    1.10
  -7   9  -1    5.30    1.00
  -7   9  -1    6.20    1.30
   7   9   1    4.70    1.10
  -8   9   1   33.90    2.20
   8  -9   1   34.90    1.80
  -8   9   1   35.70    2.70
  -8   9   1   32.90    2.60
  -8  -9  -1   32.30    2.20
  -8  -9  -1   34.90    2.20
  -8  -9   1   32.90    2.10
  -8  -9   1   31.90    1.90
  -8  -9   1   32.00    2.00
  -8   9  -1   36.80    2.70
  -8   9  -1   38.90    2.70
  -8   9  -1   34.40    2.10
   8  -9  -1   35.60    1.90
  -9   9   1   17.20    2.20
  -9   9   1   20.40    2.20
   9  -9   1   16.80    1.40
  -9  -9  -1   21.60    2.20
  -9   9   1   24.10    1.90
  -9  -9   1   17.40    2.10
  -9  -9   1   15.90    1.70
  -9   9  -1   17.70    2.30
  -9  -9   1   17.70    1.50
  -9   9  -1   13.50    2.00
  -9   9  -1   18.00    1.70
  10  -9   1   21.30    1.60
 -10   9   1   22.80    2.50
 -10   9   1   24.60    2.40
 -10  -9  -1   24.00    2.00
 -10   9   1   27.60    2.10
  10  -9  -1   23.10    1.70
 -10   9  -1   20.90    3.20
 -10   9  -1   22.90    1.90
 -10  -9   1   21.10    1.90
 -10   9  -1   24.70    2.50
   0 -10   1   44.50    2.10
   0 -10   1   47.90    2.70
   0 -10  -1   48.90    2.00
   0  10   1   47.30    2.00
   0 -10   1   48.60    1.90
   0  10   1   51.59    2.80
   0  10  -1   48.90    1.80
   0  10  -1   49.10    2.70
   0 -10  -1   49.99    2.10
   1  10  -1    3.50    0.70
  -1 -10  -1    3.40    1.00
  -1 -10  -1    3.20    0.70
   1 -10   1    4.30    0.70
  -1 -10  -1    3.30    0.80
  -1  10   1    3.70    1.00
   1 -10   1    4.30    0.70
  -1  10   1    2.20    0.90
   1  10  -1    2.80    0.80
  -1  10   1    3.40    0.70
   1  10   1    2.50    0.90
   1 -10  -1    2.30    0.70
  -1 -10   1    2.30    0.60
  -1 -10   1    2.30    0.60
   1 -10  -1    3.20    0.60
  -1  10  -1    2.00    0.80
  -1 -10   1    1.50    0.70
  -1 -10   1    3.00    0.60
  -1  10  -1    1.90    0.90
   1  10   1    3.20    0.60
  -1  10  -1    3.40    0.60
  -2  10   1   66.39    3.20
  -2 -10  -1   69.29    3.30
   2 -10   1   67.29    2.10
  -2  10   1   69.29    2.60
  -2 -10  -1   68.79    2.70
  -2 -10  -1   69.99    2.60
   2  10  -1   61.29    3.00
  -2  10   1   68.49    2.40
  -2 -10  -1   66.69    2.50
   2  10  -1   67.29    2.30
   2 -10   1   67.19    2.30
  -2  10   1   68.19    5.20
  -2 -10   1   58.59    2.90
  -2 -10   1   65.09    2.10
  -2 -10   1   61.69    3.00
   2 -10  -1   65.39    2.60
   2  10   1   62.89    2.30
  -2  10  -1   65.19    2.50
  -2  10  -1   66.29    3.90
   2  10   1   64.99    3.10
  -2  10  -1   64.79    3.00
   2 -10  -1   63.39    2.20
  -2  10  -1   61.29    2.10
  -3  10   1    6.60    1.30
  -3 -10  -1    8.80    1.10
  -3  10   1    9.00    1.50
  -3  10   1   10.00    1.20
   3 -10   1    7.90    0.80
  -3  10   1    9.70    1.00
   3  10  -1    8.90    0.90
  -3 -10  -1   12.30    1.90
   3 -10   1    8.80    1.10
   3  10  -1   10.00    1.50
  -3 -10  -1    9.40    1.20
  -3  10  -1    8.60    1.50
   3 -10  -1    8.20    0.90
  -3 -10   1   10.50    1.00
   3  10   1    8.60    1.20
  -3  10  -1    9.70    1.60
  -3  10  -1    8.20    1.00
  -3 -10   1    9.60    0.90
   3 -10  -1   10.20    1.30
   3  10   1    8.70    1.50
  -3 -10   1    9.20    1.30
  -4 -10  -1   89.09    3.10
  -4 -10  -1   87.09    3.10
   4 -10   1   80.79    2.80
   4 -10   1   86.69    2.40
   4  10  -1   88.49    3.60
  -4  10   1   81.59    4.40
  -4  10   1   87.09    3.20
  -4  10   1   87.89    3.90
   4  10  -1   81.59    3.20
  -4 -10   1   81.39    3.40
  -4  10  -1   88.79    3.10
  -4  10  -1   86.19    3.70
  -4  10  -1   88.79    4.00
  -4 -10   1   81.89    2.60
   4  10   1   80.69    3.50
   4 -10  -1   85.39    2.60
  -4 -10   1   85.39    3.10
   4  10   1   84.79    2.90
   4 -10  -1   86.19    3.20
  -5 -10  -1   17.30    1.50
   5  10  -1   17.60    1.40
   5 -10   1   17.00    1.30
  -5  10   1   14.90    2.00
  -5  10   1   18.80    2.00
  -5 -10  -1   16.30    1.40
   5 -10   1   18.20    1.10
   5  10  -1   15.50    1.70
  -5 -10   1   17.90    1.30
  -5  10  -1   17.40    1.50
   5 -10  -1   13.60    1.40
  -5 -10   1   16.60    1.20
  -5  10  -1   18.00    1.80
   5 -10  -1   18.20    1.20
  -5 -10   1   17.90    1.70
   5  10   1   17.30    1.80
  -5  10  -1   17.00    1.80
  -6  10   1  151.78    5.40
  -6 -10  -1  147.89    4.70
  -6  10   1  142.29    5.30
  -6  10   1  153.38    4.70
   6 -10   1  145.99    3.60
   6  10  -1  151.48    4.90
  -6 -10  -1  145.39    4.30
   6 -10   1  143.49    4.30
   6  10   1  148.69    5.80
  -6  10  -1  140.59    5.10
  -6  10  -1  141.39    5.30
  -6 -10   1  141.99    3.90
  -6 -10   1  145.49    4.00
   6 -10  -1  147.99    3.80
   6 -10  -1  134.59    4.40
  -6  10  -1  138.49    4.30
  -6 -10   1  134.59    5.40
  -7 -10  -1   10.90    1.40
  -7  10   1    9.00    1.40
   7 -10   1   10.60    1.00
   7  10  -1   10.50    1.60
  -7 -10  -1   17.30    1.70
   7 -10   1   12.20    1.50
  -7  10   1   11.90    1.90
  -7  10   1   10.50    1.70
   7  10   1   11.80    1.70
  -7  10  -1   12.40    1.90
  -7 -10   1   10.40    1.30
  -7  10  -1   14.00    2.00
  -7 -10   1   12.80    1.30
  -7  10  -1   11.10    1.50
   7 -10  -1   10.20    1.10
   8 -10   1   70.29    2.50
  -8  10   1   65.99    3.80
  -8 -10  -1   66.19    3.00
  -8  10   1   68.79    3.80
  -8  10   1   67.99    3.20
  -8 -10   1   64.59    2.80
  -8  10  -1   69.89    3.70
  -8 -10   1   69.79    2.80
   8 -10  -1   65.99    2.60
  -8  10  -1   70.09    3.20
  -8  10  -1   66.39    3.80
  -9  10   1    7.60    2.10
  -9  10   1    8.70    1.70
  -9  10   1    8.90    1.40
   9 -10   1    8.20    1.10
  -9 -10  -1    6.40    1.30
  -9  10  -1    7.30    1.50
   9 -10  -1    7.10    1.20
  -9  10  -1    9.70    2.20
  -9 -10   1    6.00    1.20
  -9  10  -1    8.80    1.30
  -9 -10   1    8.30    1.20
   0  11  -1   68.09    2.30
   0 -11   1   67.39    2.40
   0 -11  -1   64.79    2.50
   0 -11  -1   65.89    2.50
   0  11  -1   69.79    3.40
   0  11   1   66.39    2.50
   0  11   1   67.99    3.40
   1 -11   1   86.09    2.60
  -1  11   1   85.49    5.60
   1  11  -1   87.79    2.70
  -1  11   1   92.19    3.20
   1 -11   1   90.19    2.70
  -1 -11  -1   88.79    3.10
   1  11  -1   90.59    3.80
  -1  11   1   87.59    3.90
  -1 -11  -1   92.19    3.10
  -1  11   1   85.09    2.90
   1 -11  -1   93.29    3.00
  -1  11  -1   90.09    2.70
  -1  11  -1   90.29    4.00
   1  11   1   96.09    4.00
   1 -11  -1   90.49    3.10
   1  11   1   93.89    3.00
  -1 -11   1   90.69    2.50
  -1 -11   1   91.39    2.70
  -1  11  -1   89.49    3.80
   2  11  -1    3.80    1.00
   2  11  -1    3.40    0.70
  -2  11   1    3.90    1.10
  -2 -11  -1    4.40    0.90
   2 -11   1    2.70    0.60
  -2 -11  -1    4.80    0.90
  -2  11   1    3.50    1.10
  -2  11   1    4.30    0.80
  -2 -11  -1    4.40    0.90
  -2  11   1    3.50    0.80
   2 -11   1    4.50    0.80
  -2  11  -1    3.30    1.10
  -2  11  -1    3.30    0.70
   2 -11  -1    4.00    0.80
   2  11   1    4.40    0.90
  -2  11  -1    4.20    0.90
   2  11   1    4.30    1.10
  -2  11  -1    4.00    1.10
   2 -11  -1    6.00    0.90
   3  11  -1   57.49    3.10
   3 -11   1   58.49    2.00
  -3  11   1   59.19    2.60
  -3  11   1   59.49    3.30
  -3  11   1   58.89    2.40
  -3 -11  -1   65.39    2.50
   3 -11   1   56.79    2.20
  -3  11   1   59.09    3.30
  -3 -11  -1   62.79    2.40
  -3  11  -1   59.69    2.50
   3 -11  -1   56.29    2.50
   3 -11  -1   59.29    2.20
  -3  11  -1   56.39    3.00
   3  11   1   62.29    3.20
   3  11   1   57.59    2.40
  -3  11  -1   57.19    3.20
  -4  11   1   26.60    2.30
  -4  11   1   24.20    1.80
   4  11  -1   21.80    1.50
   4 -11   1   24.40    1.30
  -4  11   1   18.60    2.00
  -4 -11  -1   24.00    1.60
   4 -11   1   25.30    1.50
   4  11  -1   21.60    2.00
  -4 -11  -1   25.00    1.70
   4 -11  -1   21.40    2.10
  -4  11  -1   26.90    2.20
   4  11   1   20.80    1.90
   4 -11  -1   22.40    1.40
  -4  11  -1   23.60    2.20
  -5 -11  -1   32.60    1.90
  -5  11   1   36.10    2.60
  -5  11   1   30.90    2.50
   5 -11   1   33.20    1.50
  -5  11   1   34.60    2.20
   5  11  -1   32.50    2.40
  -5 -11  -1   35.70    2.00
   5 -11   1   31.60    1.80
   5  11   1   31.10    2.40
  -5  11  -1   28.30    2.40
  -5  11  -1   29.80    2.30
   5 -11  -1   28.40    1.90
   5 -11  -1   29.70    1.60
  -5  11  -1   32.80    2.00
  -5 -11   1   30.40    1.60
  -5 -11   1   33.40    1.60
  -6  11   1   34.70    2.70
  -6  11   1   36.40    2.80
  -6 -11  -1   33.60    2.00
   6 -11   1   30.80    2.30
  -6 -11  -1   33.50    2.60
   6  11  -1   30.80    2.40
   6 -11   1   36.00    1.60
  -6  11   1   34.50    2.20
  -6  11  -1   33.60    2.70
  -6  11  -1   33.60    2.20
   6  11   1   36.70    2.60
  -6 -11   1   33.60    1.80
  -6  11  -1   35.90    2.60
  -6 -11   1   36.40    1.80
   6 -11  -1   33.40    1.70
   7 -11   1   29.00    1.90
  -7 -11  -1   29.50    1.90
  -7  11   1   28.60    2.20
   7  11  -1   28.40    2.20
  -7  11   1   33.00    2.70
  -7  11   1   27.00    2.50
   7 -11   1   30.00    1.50
  -7 -11  -1   26.80    2.00
   7  11   1   30.20    2.40
  -7 -11   1   27.20    1.70
  -7  11  -1   31.30    2.10
  -7  11  -1   29.80    2.70
   7 -11  -1   27.30    1.70
  -7  11  -1   33.10    2.60
  -7 -11   1   30.30    1.70
   8 -11   1   26.10    1.50
  -8  11   1   26.40    2.10
  -8  11   1   16.90    2.80
  -8 -11  -1   21.60    1.80
   8  11  -1   26.90    2.20
  -8  11  -1   24.70    2.60
  -8 -11   1   25.40    1.80
   8 -11  -1   26.60    1.70
  -8  11  -1   24.60    2.60
  -8 -11   1   28.50    1.70
  -8  11  -1   24.60    2.00
   0  12  -1   -0.60    0.40
   0 -12  -1    0.40    0.40
   0  12  -1    0.00    0.60
   0 -12  -1   -0.10    0.50
   0  12   1    0.80    0.70
  -1  12   1    3.70    0.80
   1  12  -1    4.70    1.10
  -1 -12  -1    3.30    0.80
  -1  12   1    2.70    0.60
  -1 -12  -1    3.70    0.80
  -1  12   1    3.80    1.20
   1 -12   1    3.00    0.70
  -1 -12  -1    3.10    0.80
   1  12  -1    2.00    0.60
  -1  12  -1    3.40    0.80
   1  12   1    2.80    0.70
   1 -12  -1    3.90    0.80
  -1  12  -1    6.00    1.30
   1 -12  -1    4.20    0.80
  -1  12  -1    2.20    1.00
  -1  12  -1    3.10    0.70
   1  12   1    3.50    1.10
   2  12  -1   65.99    3.40
   2 -12   1   68.69    2.30
  -2  12   1   68.49    3.70
  -2 -12  -1   65.39    2.60
  -2 -12  -1   68.89    2.60
  -2  12   1   63.89    3.50
  -2  12   1   68.19    2.90
  -2  12   1   66.59    2.60
   2  12   1   68.39    2.60
  -2  12  -1   65.79    2.40
  -2  12  -1   71.79    3.70
   2 -12  -1   65.59    2.50
  -2  12  -1   68.59    2.80
   2  12   1   67.39    3.50
   2 -12  -1   64.59    2.60
  -2  12  -1   69.99    3.60
  -3  12   1   31.90    2.60
  -3  12   1   28.10    1.90
  -3 -12  -1   25.40    1.60
   3 -12   1   24.90    1.40
  -3 -12  -1   30.10    1.70
  -3  12   1   27.20    2.40
   3  12  -1   30.40    2.30
   3  12  -1   26.40    1.60
  -3  12  -1   27.80    1.80
  -3  12  -1   26.70    2.30
  -3  12  -1   28.60    2.40
   3 -12  -1   24.50    1.70
   3 -12  -1   29.50    1.60
   3  12   1   28.50    2.30
   4  12  -1   44.90    2.80
  -4 -12  -1   46.50    2.20
  -4  12   1   45.60    3.00
  -4 -12  -1   47.30    2.20
  -4  12   1   44.40    3.00
   4 -12   1   47.50    1.90
  -4  12   1   44.30    2.50
   4 -12   1   46.50    2.10
  -4  12  -1   47.20    3.10
   4 -12  -1   42.50    1.90
   4  12   1   46.90    3.00
   4 -12  -1   39.80    2.20
  -4  12  -1   43.30    2.90
  -4  12  -1   46.10    2.40
  -5  12   1    9.10    1.40
  -5 -12  -1    9.80    1.20
   5  12  -1    6.90    1.40
  -5  12   1    6.70    1.50
   5 -12   1    7.80    0.90
  -5 -12  -1    9.70    1.20
   5 -12   1    8.10    1.10
  -5  12   1    8.50    1.70
   5  12   1    6.50    1.40
   5 -12  -1    7.20    1.00
  -5  12  -1    8.80    1.70
  -5  12  -1    7.00    1.20
  -5  12  -1    8.50    1.80
   5 -12  -1    7.40    1.20
  -6  12   1   59.59    4.50
   6 -12   1   46.00    3.40
   6 -12   1   44.80    1.80
  -6 -12  -1   46.70    2.60
   6  12  -1   51.49    3.00
  -6  12   1   44.20    3.10
  -6  12   1   47.60    2.70
  -6 -12  -1   45.10    2.30
  -6  12  -1   45.30    2.60
   6  12   1   47.40    3.00
  -6  12  -1   47.90    3.10
   6 -12  -1   46.20    2.00
   7 -12   1   12.90    1.10
  -7 -12  -1   10.20    2.00
   7  12  -1   13.60    1.90
  -7  12   1   13.70    1.80
  -7 -12  -1   12.90    1.40
  -7  12   1   13.00    2.00
  -7  12   1   12.50    2.10
   7 -12   1   14.00    2.10
   7  12   1   12.50    1.90
  -7  12  -1   12.90    3.30
  -7  12  -1   13.50    1.70
  -7  12  -1   11.80    2.10
   7 -12  -1   11.20    1.20
   0  13   1    8.50    1.70
   0  13  -1    7.40    1.00
   0  13  -1    6.00    1.30
   0 -13  -1    9.80    1.20
   0  13   1    6.70    1.00
   0 -13  -1    7.80    1.10
   0 -13  -1   10.30    1.10
  -1 -13  -1    2.50    0.70
   1  13  -1    3.30    1.00
  -1  13   1    2.40    0.80
   1 -13   1    3.30    0.70
  -1  13   1    1.70    0.80
   1  13  -1    2.30    0.80
  -1 -13  -1    3.20    0.70
  -1  13   1    4.50    1.20
   1  13   1    3.40    0.90
  -1  13  -1    3.60    0.80
   1 -13  -1    2.70    0.70
   1  13   1    5.60    1.40
  -1  13  -1    3.70    1.00
   1 -13  -1    3.90    0.80
  -1  13  -1    4.30    1.30
   2  13  -1    4.20    0.90
  -2 -13  -1    4.80    0.90
  -2  13   1    2.90    1.30
   2 -13   1    5.70    0.90
  -2  13   1    3.00    0.90
  -2  13   1    4.30    0.90
   2  13  -1    4.30    1.20
  -2 -13  -1    5.10    0.90
   2 -13  -1    4.90    0.90
   2 -13  -1    4.90    0.90
  -2  13  -1    4.60    1.00
   2  13   1    5.50    1.50
  -2  13  -1    2.90    1.20
  -2  13  -1    4.30    0.80
  -2  13  -1    4.60    1.20
   3  13  -1   64.29    3.60
  -3  13   1   65.39    3.90
  -3 -13  -1   66.89    2.60
  -3  13   1   64.79    3.00
   3 -13   1   66.79    2.30
  -3 -13  -1   69.39    2.60
  -3  13   1   65.89    3.80
   3  13   1   71.69    3.80
  -3  13  -1   70.09    3.10
  -3  13  -1   68.19    3.70
   3 -13  -1   64.89    2.50
  -3  13  -1   59.89    3.70
   4  13  -1   11.40    1.70
  -4 -13  -1    8.50    1.00
  -4  13   1    8.90    1.70
  -4  13   1    6.90    1.20
  -4  13   1    8.40    1.80
  -4 -13  -1   10.70    1.20
   4 -13   1    8.80    1.00
  -4  13  -1   11.70    1.80
   4 -13  -1   10.20    1.10
   4 -13  -1    9.20    1.30
  -4  13  -1    9.80    1.90
   4  13   1    7.50    1.70
  -4  13  -1    7.00    1.20
   5  13  -1   46.60    3.10
  -5  13   1   43.40    4.80
   5 -13   1   49.90    2.00
  -5  13   1   46.10    3.40
  -5  13   1   45.70    2.70
  -5 -13  -1   47.60    2.20
   5 -13  -1   48.00    2.10
  -5  13  -1   56.99    3.70
   5  13   1   51.59    3.30
  -5  13  -1   47.90    2.70
  -5  13  -1   51.59    3.40
   0  14  -1   31.10    2.00
   0  14   1   30.70    2.20
   0  14  -1   31.50    2.60
   0  14   1   25.30    2.60
  -1  14   1    3.80    1.10
  -1  14   1    1.10    0.70
   1  14  -1    1.90    1.00
   1 -14  -1    2.80    0.80
   1  14   1    1.90    0.90
  -1  14  -1    0.50    0.70
  -1  14  -1    2.90    1.10
   0   0  -2 2145.09   43.60
   0   0   2 2436.26   44.80
  -1   0  -2 1874.81   51.49
   1   0   2 2046.10   53.79
   1   0  -2 2098.09   51.19
   2   0  -2 1628.14   57.69
   2   0   2 1736.23   61.79
   3   0   2   18.50    0.80
   3   0  -2   16.60    0.90
  -3   0  -2   19.00    0.80
  -3   0   2   19.10    0.90
   3   0   2   17.70    0.80
   3   0  -2   18.10    0.90
   4   0  -2  791.02   12.70
   4   0   2  761.22   12.60
  -4   0  -2  784.12   12.80
  -4   0   2  774.22   12.80
  -4   0   2  780.22   12.80
  -4   0  -2  787.32   12.50
   4   0  -2  786.42   12.80
   4   0   2  781.42   12.50
  -5   0  -2  210.98    4.40
   5   0   2  205.48    4.70
   5   0   2  212.48    4.40
   5   0  -2  209.78    4.80
  -5   0   2  206.68    4.70
  -6   0  -2   17.80    1.20
  -6   0   2   19.90    1.30
  -6   0  -2   17.70    1.30
   6   0   2   16.80    1.10
   6   0  -2   16.90    1.10
   6   0   2   19.00    1.30
   6   0  -2   20.40    1.30
  -7   0  -2   43.60    2.20
   7   0   2   45.50    1.90
  -7   0  -2   43.90    2.00
   7   0  -2   42.20    2.00
  -7   0   2   44.90    2.10
  -7   0   2   43.40    2.10
   7   0  -2   43.60    2.10
   7   0   2   45.90    2.10
  -8   0   2  192.68    4.60
  -8   0  -2  195.58    5.30
  -8   0   2  194.98    5.30
   8   0  -2  198.48    5.30
   8   0   2  200.28    5.00
   8   0  -2  195.98    5.00
  -8   0   2  203.18    5.30
   8   0   2  183.98    5.10
  -8   0  -2  201.78    5.10
   9   0   2   22.10    1.70
  -9   0   2   23.90    1.80
   9   0  -2   25.10    1.70
  -9   0   2   25.20    1.60
   9   0   2   24.40    1.60
  -9   0   2   23.30    1.80
  -9   0  -2   23.10    1.90
  -9   0  -2   23.70    1.70
   9   0  -2   20.90    1.70
 -10   0   2   10.50    1.60
 -10   0   2   10.10    1.10
 -10   0  -2    9.50    1.50
 -10   0   2   12.90    1.80
  10   0   2   12.90    1.60
 -10   0  -2    9.80    1.40
 -11   0  -2   58.69    3.20
 -11   0   2   64.49    3.20
 -11   0  -2   60.69    3.00
 -11   0   2   63.69    3.20
 -11   0   2   58.49    2.60
 -12   0   2   60.59    3.30
 -12   0  -2   55.09    3.30
 -12   0   2   59.89    2.70
 -12   0  -2   60.39    3.10
 -12   0   2   60.59    3.40
 -12   0   2   54.79    2.60
 -13   0   2   98.09    3.70
 -13   0  -2  106.69    4.30
 -13   0   2  103.99    3.70
 -13   0  -2   90.39    4.70
 -13   0   2  105.39    4.70
 -13   0   2   99.89    4.50
 -13   0  -2  103.19    4.30
   0   1  -2  149.99    2.60
   0   1   2  136.89    2.60
   0   1  -2  144.19    2.30
   0   1  -2  145.89    2.20
  -1   1   2  856.21   12.80
   1   1   2  843.92   12.90
   1  -1  -2  837.22   13.00
  -1   1  -2  894.61   12.70
   2  -1   2  217.08    3.50
  -2  -1  -2  206.98    3.90
  -2   1   2  209.58    3.90
   2   1  -2  214.08    3.70
   2   1  -2  204.38    3.80
  -2   1   2  202.88    3.80
   2  -1   2  218.48    3.70
  -2   1   2  216.88    3.70
  -2  -1  -2  207.78    3.80
  -2  -1  -2  212.48    3.90
  -2  -1   2  222.48    3.30
   2   1   2  207.58    3.80
   2  -1  -2  212.98    3.70
   2   1   2  205.78    3.80
  -2  -1   2  212.68    3.70
  -2  -1   2  216.88    3.90
  -2   1  -2  216.48    3.80
  -2   1  -2  211.88    3.60
   2  -1  -2  209.88    4.00
   2  -1  -2  216.68    3.80
  -3   1   2  176.08    3.70
  -3   1   2  170.08    3.60
  -3   1   2  180.28    3.40
   3   1  -2  184.78    3.60
  -3  -1  -2  176.08    3.70
   3  -1   2  177.68    3.30
   3   1  -2  183.38    3.70
   3  -1   2  184.08    3.60
   3  -1  -2  173.28    3.50
  -3  -1   2  176.18    3.50
  -3  -1   2  176.28    3.00
   3  -1  -2  179.18    3.70
   3   1   2  175.58    3.50
   3   1   2  179.28    3.50
  -3  -1   2  172.58    3.60
  -3   1  -2  178.08    3.30
   4   1  -2   49.50    1.70
   4  -1   2   50.39    1.70
  -4  -1  -2   45.90    1.70
  -4   1   2   48.20    1.50
  -4  -1  -2   46.70    1.60
   4   1  -2   45.00    1.60
   4  -1   2   46.50    1.50
  -4   1  -2   43.10    1.60
   4   1   2   43.60    1.60
   4  -1  -2   42.60    1.50
  -4   1  -2   46.30    1.50
  -4  -1   2   46.60    1.60
   4   1   2   44.20    1.60
   4  -1  -2   44.80    1.70
  -4  -1   2   43.00    1.60
  -5  -1  -2  720.03   13.40
  -5   1   2  765.42   12.20
   5  -1   2  752.62   12.20
  -5   1   2  737.03   12.70
  -5  -1  -2  741.93   12.40
  -5   1  -2  747.43   12.90
   5   1   2  747.53   12.70
  -5  -1   2  764.52   12.70
  -5  -1   2  747.33   12.80
  -5   1  -2  753.12   12.40
   5   1   2  753.52   12.60
   5  -1  -2  756.32   12.80
  -6  -1  -2   61.59    2.40
  -6   1   2   61.69    2.40
   6  -1   2   59.19    2.10
  -6   1   2   59.89    2.10
   6   1  -2   63.09    2.30
   6   1  -2   62.89    2.30
  -6  -1  -2   59.59    2.20
   6  -1   2   59.49    2.30
  -6   1   2   58.89    2.20
  -6   1  -2   65.49    2.20
   6  -1  -2   63.99    2.20
   6  -1  -2   61.69    2.40
   6   1   2   62.09    2.30
  -6   1  -2   60.49    2.40
  -6  -1   2   64.69    2.40
   6   1   2   61.59    2.20
   7   1  -2  318.17    6.90
   7  -1   2  315.87    6.90
   7  -1   2  309.27    6.50
  -7   1   2  314.57    6.50
  -7   1   2  314.67    6.80
  -7   1   2  323.77    7.10
  -7  -1  -2  322.67    6.80
  -7  -1  -2  332.47    7.20
  -7   1  -2  319.07    6.60
  -7   1  -2  311.17    7.00
   7  -1  -2  327.77    7.10
   7   1   2  312.17    6.80
  -7  -1   2  317.77    6.90
   7  -1  -2  326.07    6.70
   7   1   2  319.07    6.70
  -7  -1   2  316.17    6.90
   8  -1   2  155.68    4.10
  -8   1   2  147.79    4.50
   8  -1   2  155.28    4.40
   8   1  -2  149.49    4.30
  -8  -1  -2  146.09    4.20
   8   1  -2  146.39    4.40
  -8   1   2  146.59    4.00
  -8   1   2  151.68    4.40
  -8  -1  -2  143.69    4.50
  -8   1  -2  156.18    4.30
   8   1   2  149.09    4.40
   8   1   2  153.78    4.30
  -8  -1   2  152.88    4.50
  -8   1  -2  154.88    4.60
   8  -1  -2  144.49    4.40
   8  -1  -2  145.29    4.20
  -8  -1   2  155.48    4.50
  -9  -1  -2  108.19    3.80
  -9  -1  -2  110.69    4.00
   9  -1   2  113.69    3.60
   9  -1   2  115.89    3.90
  -9   1   2  114.29    4.10
   9   1  -2  106.39    3.90
   9   1  -2  107.79    3.80
  -9   1   2  115.89    3.90
  -9   1   2  111.09    3.50
  -9  -1   2  114.29    3.30
  -9  -1   2  115.29    4.00
   9  -1  -2  106.89    3.90
  -9   1  -2  106.99    4.00
   9   1   2  110.49    3.90
  -9  -1   2  114.09    4.00
  -9   1  -2  112.39    3.70
   9  -1  -2  112.29    3.70
 -10  -1  -2   32.10    2.00
 -10   1   2   23.70    3.10
  10  -1   2   33.50    2.00
 -10   1   2   31.00    1.80
 -10  -1  -2   34.90    2.20
 -10  -1  -2   31.00    2.30
 -10  -1   2   34.20    2.20
  10   1   2   31.60    2.10
 -10  -1   2   34.70    2.30
 -10   1  -2   37.90    2.20
 -10  -1   2   34.20    1.80
 -10   1  -2   33.10    2.30
 -11   1   2   68.29    3.30
 -11   1   2   61.69    3.30
 -11  -1  -2   57.39    2.80
 -11   1   2   63.79    2.80
 -11  -1  -2   65.39    3.20
 -11  -1  -2   59.29    3.20
 -11   1  -2   61.49    3.00
 -11  -1   2   61.59    2.60
 -11  -1   2   61.79    2.50
 -11   1  -2   60.19    3.00
 -11  -1   2   65.89    3.30
 -11   1  -2   63.09    3.40
 -11  -1   2   69.79    3.30
 -12  -1  -2   27.90    2.50
 -12   1   2   24.40    2.30
 -12   1   2   28.30    2.20
 -12   1   2   25.70    1.90
 -12  -1  -2   29.50    2.20
 -12  -1   2   27.20    1.80
 -12  -1   2   29.70    2.30
 -12   1  -2   27.00    2.10
 -12   1  -2   27.70    2.40
 -12  -1   2   26.70    1.80
 -12  -1   2   28.40    2.30
 -12   1  -2   26.70    2.20
 -13   1   2    2.70    1.10
 -13   1   2    1.90    0.80
 -13  -1  -2    1.70    1.00
 -13   1   2    2.00    1.00
 -13   1  -2    1.00    0.90
 -13  -1   2    1.70    0.80
 -13  -1   2    1.80    1.00
 -13  -1   2    1.10    0.80
 -13   1  -2    1.10    0.70
 -13  -1   2    2.50    1.20
   0  -2   2 9585.04  155.68
   0   2  -2 9556.54  156.28
   0  -2  -2 9999.00  179.18
  -1  -2  -2  690.73   11.10
  -1  -2  -2  706.83   10.90
   1  -2   2  707.13   11.30
   1   2  -2  730.33   10.60
   1   2  -2  707.23   11.00
  -1   2   2  708.43   11.00
  -1   2   2  704.93   11.10
  -1   2   2  703.83   10.90
   1  -2   2  722.33   10.60
   1   2  -2  715.73   10.80
  -1  -2   2  699.73   10.70
  -1   2  -2  704.73   10.60
   1  -2  -2  696.13   11.00
  -1   2  -2  682.93   11.10
   1   2   2  710.23   10.80
   1   2   2  704.53   11.00
  -1   2  -2  700.43   10.40
   1  -2  -2  696.83   11.00
   1  -2  -2  688.53   10.70
  -2   2   2  503.35    8.20
   2  -2   2  518.75    8.10
   2   2  -2  512.85    8.10
   2   2  -2  517.95    7.90
  -2   2   2  503.95    8.30
  -2   2   2  508.45    8.50
   2   2  -2  513.45    8.40
  -2  -2  -2  513.25    8.40
  -2  -2  -2  510.65    8.30
   2  -2   2  491.25    7.80
  -2   2  -2  519.35    8.70
   2   2   2  506.65    8.30
   2  -2  -2  503.55    8.30
  -2  -2   2  524.35    8.00
  -2  -2   2  513.35    8.40
   2   2   2  508.15    8.50
   2  -2  -2  514.85    8.20
  -2   2  -2  520.55    8.30
   2  -2  -2  523.75    8.40
   2  -2  -2  505.85    8.50
  -2  -2   2  498.85    8.00
  -2   2  -2  512.05    7.90
  -3  -2  -2  101.89    2.50
   3   2  -2  102.79    2.60
   3   2  -2   99.39    2.40
  -3   2   2  103.09    2.50
   3  -2   2  103.59    2.40
   3  -2   2   98.99    2.10
  -3   2   2  100.69    2.40
   3   2  -2  103.79    2.10
   3  -2  -2  108.39    2.50
  -3  -2   2  100.19    2.50
  -3   2  -2  101.09    2.20
  -3  -2   2   99.09    2.00
  -3  -2   2   94.79    2.30
   3  -2  -2  104.89    2.40
   3  -2  -2  102.89    2.60
  -3   2  -2  101.09    2.70
   3   2   2  103.09    2.50
  -3   2  -2   95.99    2.50
   3   2   2   97.79    2.40
  -4   2   2  601.74   10.10
  -4  -2  -2  596.74   10.20
  -4  -2  -2  582.14   10.30
   4  -2   2  590.94    9.70
   4   2  -2  601.64   10.30
   4  -2   2  620.24   10.20
   4   2  -2  607.04   10.10
  -4   2   2  603.64   10.20
  -4  -2   2  616.94   10.10
  -4  -2   2  594.04   10.30
  -4  -2   2  590.44    9.50
   4   2   2  602.74   10.20
   4   2   2  589.84   10.10
  -4   2  -2  605.14   10.30
  -4   2  -2  612.34    9.90
  -5  -2  -2  744.93   13.00
   5   2  -2  743.93   12.80
  -5   2   2  753.12   13.00
   5  -2   2  745.23   13.30
  -5  -2  -2  750.02   12.70
  -5   2   2  764.42   12.60
   5   2  -2  759.02   12.90
   5  -2   2  753.62   12.20
  -5   2   2  763.32   12.70
   5  -2  -2  746.53   12.50
  -5  -2   2  760.42   12.90
   5   2   2  753.72   12.80
   5  -2  -2  749.13   12.90
  -5   2  -2  746.03   13.70
  -5  -2   2  727.93   12.50
  -5  -2   2  762.42   11.90
  -5   2  -2  760.92   12.40
   5   2   2  750.12   12.70
  -6   2   2   59.09    2.20
   6   2  -2   57.19    2.20
  -6  -2  -2   58.19    2.10
  -6  -2  -2   57.09    2.30
   6  -2   2   58.69    2.20
   6   2  -2   53.79    2.20
   6  -2   2   57.29    2.20
  -6   2   2   54.39    2.10
  -6   2   2   56.39    2.30
   6  -2  -2   55.89    2.30
  -6  -2   2   55.89    2.20
   6  -2  -2   57.19    2.10
  -6   2  -2   56.79    2.10
   6   2   2   59.59    2.30
  -6   2  -2   51.29    2.20
  -6  -2   2   55.89    1.80
  -6  -2   2   53.29    2.10
   6   2   2   59.19    2.20
   6   2   2   55.79    2.20
  -7  -2  -2   12.40    1.10
  -7   2   2   12.10    1.30
   7  -2   2   12.30    1.00
   7  -2   2   10.60    1.10
  -7   2   2   10.60    1.10
  -7   2   2   12.10    1.30
   7   2  -2   13.50    1.20
  -7  -2  -2   12.30    1.20
   7  -2  -2   11.70    1.10
  -7   2  -2   12.90    1.30
   7   2   2   12.90    1.10
  -7  -2   2   10.40    1.10
  -7  -2   2   11.90    1.10
   7   2   2   15.10    1.30
   7   2   2   14.20    1.20
  -7   2  -2   12.40    1.10
  -7  -2   2   11.60    0.90
  -8  -2  -2  225.58    5.40
  -8  -2  -2  222.08    5.80
   8   2  -2  227.28    5.70
   8  -2   2  211.88    5.50
   8  -2   2  223.38    5.20
  -8   2   2  219.18    5.60
  -8  -2  -2  225.78    5.70
   8   2  -2  222.58    5.70
  -8   2   2  216.28    5.30
  -8   2   2  221.68    5.90
   8   2   2  235.88    7.10
   8  -2  -2  228.98    5.50
   8  -2  -2  229.18    6.70
  -8   2  -2  221.58    5.90
   8   2   2  232.18    5.70
  -8  -2   2  223.08    5.80
  -8   2  -2  223.28    5.40
  -8   2  -2  229.68    5.90
  -8  -2   2  226.28    4.90
  -8  -2   2  235.38    5.80
   8   2   2  232.98    5.80
  -9   2   2   24.30    1.70
  -9   2   2   26.30    1.80
   9  -2   2   29.00    1.70
  -9   2   2   25.70    2.00
  -9  -2  -2   26.10    2.00
   9  -2   2   23.10    1.80
   9   2  -2   28.60    1.90
   9   2  -2   28.00    1.80
  -9  -2  -2   28.00    1.80
  -9  -2   2   25.90    1.90
   9  -2  -2   28.00    2.00
  -9   2  -2   27.50    1.80
  -9  -2   2   25.70    1.50
  -9   2  -2   22.60    1.90
  -9  -2   2   23.50    1.80
   9   2   2   26.70    1.80
   9  -2  -2   28.20    1.80
   9   2   2   25.90    1.80
  -9   2  -2   26.30    1.90
   9   2   2   26.80    1.80
 -10   2   2   10.50    1.70
 -10   2   2   13.80    1.90
 -10  -2  -2   12.60    1.40
 -10  -2  -2   11.90    1.70
  10  -2   2   14.50    1.40
 -10   2   2   12.00    1.30
 -10   2  -2   13.30    1.70
 -10   2  -2   11.20    1.40
 -10  -2   2   11.90    1.10
 -10  -2   2   13.00    1.70
 -10  -2   2   11.60    1.50
 -10   2  -2   14.00    1.90
 -11   2   2   68.49    3.00
 -11   2   2   66.39    3.40
 -11   2   2   62.69    3.20
 -11  -2  -2   64.69    3.40
 -11  -2  -2   65.59    2.90
 -11  -2   2   69.99    3.40
 -11   2  -2   69.19    3.50
 -11   2  -2   67.89    3.30
 -11  -2   2   67.19    2.60
 -11   2  -2   70.49    3.20
 -11  -2   2   66.09    3.40
 -12   2   2   43.70    3.00
 -12   2   2   41.40    2.70
 -12   2   2   44.60    2.50
 -12  -2  -2   47.30    3.10
 -12  -2   2   37.80    2.00
 -12   2  -2   44.80    2.70
 -12  -2   2   41.30    2.70
 -12  -2   2   46.10    2.30
 -12  -2   2   44.90    2.90
 -12   2  -2   44.40    2.70
 -12   2  -2   44.30    3.00
 -13  -2  -2   19.60    2.50
 -13   2   2   21.80    2.10
 -13   2   2   27.10    2.90
 -13  -2   2   23.60    2.90
 -13  -2   2   24.10    2.30
 -13   2  -2   19.20    2.00
 -13   2  -2   22.40    2.20
 -13  -2   2   17.40    1.60
 -13   2  -2   25.70    2.50
   0  -3   2 2282.87   56.99
   0   3  -2 2314.77   57.79
   0  -3  -2 2314.17   71.49
   1   3  -2   33.70    1.00
  -1  -3  -2   36.20    1.10
   1   3  -2   34.60    1.00
  -1   3   2   31.20    1.30
  -1   3   2   34.10    1.10
  -1   3   2   35.10    1.10
  -1  -3  -2   34.40    1.30
   1  -3   2   32.60    0.90
   1  -3   2   31.20    0.70
   1   3  -2   31.50    1.10
  -1  -3  -2   33.30    1.30
  -1   3   2   32.00    1.30
   1   3   2   30.10    1.00
   1  -3  -2   29.20    1.20
  -1  -3   2   30.00    1.10
  -1   3  -2   29.80    1.00
  -1   3  -2   30.00    0.70
   1  -3  -2   31.30    1.00
  -1   3  -2   29.10    1.20
   1  -3  -2   29.30    1.20
   1   3   2   30.70    1.20
  -2  -3  -2  151.58    3.30
   2  -3   2  153.88    2.70
   2   3  -2  153.38    3.00
  -2   3   2  153.18    3.10
  -2   3   2  146.79    3.40
   2  -3   2  160.98    3.00
  -2   3   2  153.58    3.40
  -2  -3  -2  154.18    3.30
   2  -3   2  155.28    3.60
   2   3  -2  152.48    3.30
   2   3  -2  151.98    3.00
  -2   3   2  156.88    3.20
  -2  -3   2  149.79    2.80
  -2  -3   2  153.48    3.00
  -2   3  -2  145.39    3.50
  -2   3  -2  148.39    2.80
   2  -3  -2  150.08    3.40
   2  -3  -2  149.69    3.10
   2   3   2  152.28    3.40
   2  -3  -2  150.78    3.00
   2  -3  -2  148.09    3.40
  -2   3  -2  155.38    3.10
   2   3   2  156.48    3.10
   3   3  -2  159.88    3.20
   3   3  -2  161.58    3.60
  -3   3   2  162.18    3.70
   3   3  -2  157.88    3.30
  -3  -3  -2  156.78    3.60
   3  -3   2  157.48    3.00
   3  -3   2  163.08    3.40
  -3  -3  -2  162.78    3.60
  -3   3   2  159.88    3.40
  -3   3   2  159.78    3.80
   3  -3  -2  160.68    3.40
   3  -3  -2  157.58    3.70
  -3   3  -2  155.68    3.80
   3   3   2  157.78    3.40
   3  -3  -2  156.48    3.30
  -3  -3   2  162.28    3.20
   3   3   2  158.78    3.60
  -3  -3   2  155.68    3.20
   3  -3  -2  159.38    3.60
  -3   3  -2  159.58    3.50
  -3   3  -2  156.78    3.10
  -4   3   2  850.31   14.00
   4   3  -2  831.22   14.60
   4   3  -2  849.72   13.80
   4  -3   2  867.21   13.80
  -4   3   2  874.21   14.40
  -4   3   2  843.12   13.80
   4  -3   2  846.82   13.30
  -4  -3  -2  838.22   13.90
   4   3  -2  845.52   13.40
  -4  -3  -2  857.41   14.10
   4   3   2  861.01   13.90
  -4  -3   2  788.02   14.40
   4  -3  -2  846.92   13.50
   4   3   2  861.51   14.00
  -4   3  -2  845.42   14.30
   4  -3  -2  850.21   14.00
  -4   3  -2  837.52   14.00
   4  -3  -2  835.02   13.70
  -4   3  -2  858.51   13.40
  -4  -3   2  847.92   13.60
  -4  -3   2  850.81   13.20
  -5   3   2   21.40    1.40
  -5   3   2   21.50    1.30
   5   3  -2   21.10    1.20
  -5   3   2   21.90    1.30
   5  -3   2   22.50    1.00
   5  -3   2   20.00    1.20
  -5  -3  -2   20.20    1.30
  -5  -3  -2   20.20    1.20
  -5   3  -2   19.50    1.30
   5   3   2   21.80    1.30
   5  -3  -2   22.00    1.40
  -5  -3   2   22.90    1.40
   5  -3  -2   22.00    1.20
  -5  -3   2   22.00    1.00
   5   3   2   21.30    1.30
  -5  -3   2   23.20    1.20
  -5   3  -2   22.30    1.10
  -5   3  -2   21.00    1.40
   6   3  -2    2.30    0.50
  -6   3   2    4.90    1.00
   6  -3   2    3.60    0.60
   6  -3   2    5.00    0.80
   6   3  -2    3.50    0.70
  -6   3   2    3.00    0.60
  -6   3   2    3.10    0.70
  -6  -3  -2    3.50    0.70
  -6  -3  -2    3.30    0.70
   6  -3  -2    2.70    0.60
  -6  -3   2    3.70    0.70
  -6   3  -2    3.10    0.60
   6   3   2    3.00    0.70
  -6   3  -2    2.90    0.70
  -6   3  -2    3.00    0.70
   6  -3  -2    3.70    0.70
  -6  -3   2    3.10    0.50
   6   3   2    3.80    0.70
  -6  -3   2    3.90    0.70
   7  -3   2  329.77    6.40
  -7  -3  -2  317.77    6.70
   7   3  -2  310.77    7.00
   7   3  -2  309.47    6.90
   7  -3   2  317.77    6.90
  -7   3   2  318.77    6.90
  -7  -3  -2  307.07    7.00
  -7   3   2  318.77    6.80
  -7   3   2  325.17    7.30
  -7   3  -2  324.77    7.30
  -7  -3   2  317.17    6.00
  -7  -3   2  308.57    6.80
   7  -3  -2  311.27    6.50
  -7   3  -2  316.97    6.60
   7   3   2  316.17    7.00
  -7  -3   2  306.57    7.00
  -7   3  -2  314.37    7.20
   7   3   2  313.57    6.80
   7  -3  -2  310.87    7.10
  -8  -3  -2   13.60    1.30
  -8   3   2   14.20    1.30
   8  -3   2   17.90    1.20
  -8   3   2   16.90    1.60
   8   3  -2   16.20    1.40
  -8   3   2   14.60    1.30
   8  -3   2   14.40    1.40
  -8  -3  -2   13.80    1.40
   8   3  -2   17.00    2.20
  -8  -3   2   16.20    1.50
  -8   3  -2   15.80    1.30
   8  -3  -2   16.70    1.30
  -8  -3   2   15.60    1.40
  -8   3  -2   16.20    1.50
  -8  -3   2   17.00    1.30
   8   3   2   14.90    1.30
   8   3   2   17.20    1.40
   8  -3  -2   14.90    1.40
  -8   3  -2   18.40    1.60
   9  -3   2   37.40    1.90
  -9  -3  -2   36.30    2.30
  -9  -3  -2   34.80    1.90
   9   3  -2   32.10    2.10
  -9   3   2   35.00    2.30
   9  -3   2   33.30    2.10
   9   3  -2   32.50    2.40
  -9   3   2   34.60    2.10
  -9   3   2   34.60    2.00
  -9   3  -2   36.60    2.00
  -9  -3   2   33.20    1.60
  -9  -3   2   38.20    2.30
   9  -3  -2   38.10    2.00
  -9   3  -2   34.70    2.30
  -9  -3   2   35.20    2.10
   9  -3  -2   34.10    2.50
  -9   3  -2   36.90    2.30
   9   3   2   39.20    2.20
  10  -3   2    0.70    0.50
 -10   3   2    0.70    0.50
 -10   3   2    0.60    0.60
 -10  -3  -2    1.20    0.60
 -10  -3  -2    0.00    0.50
 -10   3   2    0.40    0.50
 -10  -3   2    1.40    0.70
 -10   3  -2    0.90    0.80
 -10   3  -2    1.50    0.70
 -10   3  -2    0.80    0.60
 -10  -3   2   -0.20    0.50
 -10  -3   2    1.30    0.60
 -11   3   2  117.59    4.80
 -11  -3  -2  106.29    3.90
 -11   3   2  118.19    4.40
 -11  -3  -2  114.19    4.50
 -11   3   2  118.99    4.20
 -11  -3   2  115.19    3.50
 -11   3  -2  115.79    4.60
 -11  -3   2  109.49    4.20
 -11   3  -2  116.19    4.70
 -11   3  -2  108.29    4.00
 -11  -3   2  106.89    4.40
 -12   3   2    4.70    1.30
 -12  -3  -2    5.90    1.40
 -12   3   2    7.40    1.30
 -12   3   2    5.50    1.30
 -12  -3   2    4.80    0.90
 -12   3  -2    6.80    1.50
 -12  -3   2    3.10    1.00
 -12   3  -2    5.70    1.20
 -12   3  -2    7.30    1.40
 -13   3   2    5.90    1.60
 -13   3   2    6.20    1.30
 -13   3   2    6.50    1.30
 -13  -3  -2    5.90    1.60
 -13   3  -2    4.70    1.50
 -13  -3   2    5.60    1.10
 -13   3  -2    5.90    1.40
 -13  -3   2    6.80    1.40
 -13   3  -2    8.40    1.60
 -13  -3   2    6.30    1.50
   0  -4  -2  484.05    8.30
   0  -4   2  479.15    8.30
   0   4  -2  472.35    8.30
   0   4   2  489.25    8.40
   0   4  -2  480.05    7.80
   0  -4  -2  464.55    8.40
   0   4   2  486.15    7.90
   0  -4  -2  473.45    7.80
   0  -4   2  472.45    7.40
   0   4   2  465.05    8.40
   0   4  -2  473.15    7.40
   1   4  -2  653.23   10.10
   1   4  -2  659.03   10.70
   1  -4   2  626.44    9.70
  -1   4   2  642.94   10.40
  -1   4   2  648.04   10.90
   1   4  -2  645.44   10.40
   1  -4   2  669.03   10.10
  -1  -4  -2  636.24   10.80
   1  -4   2  649.43   11.00
  -1   4   2  635.44   10.90
  -1  -4  -2  644.54   10.80
  -1  -4  -2  653.63   10.40
   1  -4  -2  639.24   10.30
  -1  -4   2  666.43   10.00
   1  -4  -2  640.74   11.00
   1   4   2  643.94   10.90
   1  -4  -2  644.74   10.80
  -1  -4   2  651.83   10.70
  -1   4  -2  666.13   10.50
  -1   4  -2  645.84   11.00
  -1   4  -2  642.54    9.80
   1   4   2  656.03   10.40
   2   4  -2  435.56    7.30
  -2  -4  -2  428.26    7.80
  -2   4   2  438.66    7.90
   2   4  -2  432.16    7.50
   2  -4   2  427.36    8.10
   2  -4   2  436.46    6.80
  -2   4   2  432.66    7.40
  -2   4   2  419.56    7.40
  -2  -4  -2  442.96    7.60
  -2   4   2  438.26    7.90
   2  -4   2  441.46    7.20
   2  -4  -2  434.56    7.30
   2  -4  -2  420.86    7.90
  -2   4  -2  446.06    7.50
  -2   4  -2  430.16    8.00
  -2   4  -2  431.16    7.00
   2  -4  -2  433.06    7.80
  -2  -4   2  435.76    7.10
  -2  -4   2  425.96    7.50
  -2  -4   2  430.46    7.00
   2   4   2  421.56    7.80
   2   4   2  426.96    7.40
   3   4  -2  198.38    4.00
  -3   4   2  194.58    4.50
  -3   4   2  199.28    4.10
  -3  -4  -2  195.28    4.30
   3   4  -2  200.58    4.10
   3   4  -2  202.98    4.40
   3  -4   2  196.68    4.00
  -3  -4  -2  190.88    4.30
  -3   4   2  199.58    4.60
   3  -4   2  192.28    3.60
  -3  -4  -2  196.58    4.30
   3   4  -2  194.88    4.00
   3  -4  -2  191.08    4.00
  -3   4  -2  198.28    4.30
  -3   4  -2  198.38    3.80
   3  -4  -2  195.38    4.40
  -3  -4   2  207.98    4.10
   3   4   2  196.08    4.10
   3  -4  -2  193.88    3.90
  -3   4  -2  197.58    4.60
   3   4   2  192.38    4.40
   3  -4  -2  201.98    4.60
  -3  -4   2  200.48    3.90
  -4  -4  -2   95.59    2.80
   4   4  -2   92.39    2.40
   4  -4   2   91.19    2.60
   4  -4   2   89.69    2.20
  -4   4   2   89.79    2.60
   4   4  -2   92.19    2.60
   4  -4   2   91.59    2.30
   4   4  -2   89.29    2.60
  -4  -4  -2   91.49    2.90
   4   4  -2   93.69    2.80
  -4   4   2   93.59    2.90
   4  -4  -2   97.39    2.70
   4  -4  -2   99.29    3.00
  -4   4  -2   96.69    2.50
  -4   4  -2   96.19    2.90
  -4  -4   2   96.99    2.50
   4   4   2  102.69    3.00
  -4   4  -2   96.89    3.10
  -4  -4   2  101.29    2.60
   4  -4  -2   99.89    2.50
   4   4   2  105.29    3.00
   4   4   2  102.69    2.80
   4  -4  -2   98.89    3.00
  -5   4   2  111.59    3.50
   5   4  -2  110.39    3.30
  -5   4   2  111.89    3.20
   5   4  -2  111.89    3.10
  -5  -4  -2  112.79    3.30
   5  -4   2  112.19    3.10
  -5  -4  -2  113.79    3.20
   5   4  -2  111.09    2.80
  -5   4   2  110.79    3.30
   5  -4   2  112.49    2.70
   5   4   2  120.49    3.20
   5  -4  -2  110.49    3.40
  -5   4  -2  113.69    3.40
   5  -4  -2  112.79    2.90
  -5   4  -2  110.19    2.90
   5  -4  -2  112.09    3.40
   5  -4  -2  111.89    3.10
  -5  -4   2  112.69    2.80
  -5   4  -2  107.59    3.50
   5   4   2  108.89    3.30
  -5  -4   2  112.29    3.00
  -6  -4  -2   65.09    2.40
  -6   4   2   66.79    2.80
   6  -4   2   67.69    2.10
   6   4  -2   68.59    2.60
   6   4  -2   69.09    2.50
   6  -4   2   73.99    2.60
  -6   4   2   63.09    2.50
  -6  -4  -2   68.29    2.60
  -6   4   2   65.89    2.50
   6  -4  -2   62.79    2.60
  -6   4  -2   64.89    2.20
   6   4   2   61.49    2.30
  -6   4  -2   62.99    2.60
   6  -4  -2   65.29    2.40
   6   4   2   65.19    2.60
   6  -4  -2   65.19    2.20
  -6  -4   2   61.29    2.30
  -6   4  -2   65.69    2.70
  -6  -4   2   64.49    2.10
   7   4  -2   53.79    2.40
  -7   4   2   59.29    2.50
   7  -4   2   55.79    2.00
  -7   4   2   53.99    2.40
  -7  -4  -2   55.79    2.60
  -7  -4  -2   58.59    2.40
  -7   4   2   55.39    2.70
   7  -4   2   55.49    2.40
   7   4  -2   55.79    2.50
  -7   4  -2   54.49    2.60
  -7   4  -2   56.89    2.20
  -7   4  -2   55.69    2.60
   7  -4  -2   54.19    2.30
   7  -4  -2   51.79    2.40
   7  -4  -2   56.29    2.20
  -7  -4   2   52.19    1.90
   7   4   2   54.89    2.50
  -7  -4   2   52.69    2.30
   7   4   2   53.89    2.40
   8   4  -2   35.00    2.00
   8  -4   2   45.20    2.20
  -8   4   2   36.20    2.10
  -8  -4  -2   38.00    2.00
  -8   4   2   36.30    2.30
  -8  -4  -2   35.60    2.20
   8   4  -2   35.50    2.10
   8  -4   2   35.00    1.70
  -8   4   2   33.50    2.00
   8  -4  -2   39.70    1.90
   8   4   2   36.60    2.10
  -8   4  -2   40.20    2.30
  -8   4  -2   38.30    2.30
   8  -4  -2   35.40    2.00
  -8   4  -2   36.90    1.90
  -8  -4   2   37.70    2.10
  -8  -4   2   37.10    1.70
   8   4   2   35.20    2.00
   8  -4  -2   36.60    2.20
   9  -4   2   17.40    1.30
  -9  -4  -2   17.30    1.40
  -9  -4  -2   19.80    1.80
  -9   4   2   19.20    1.60
   9  -4   2   17.20    1.50
  -9   4   2   18.60    1.60
  -9  -4   2   18.20    1.30
  -9   4  -2   20.20    1.60
  -9  -4   2   17.70    1.60
   9  -4  -2   19.10    1.60
  -9   4  -2   20.00    1.80
  -9   4  -2   21.40    3.30
   9  -4  -2   16.50    1.40
 -10   4   2   21.70    1.80
 -10   4   2   17.20    1.60
 -10   4   2   16.80    1.90
 -10  -4  -2   19.90    1.90
  10  -4   2   16.90    1.40
 -10  -4   2   17.60    1.60
  10  -4  -2   15.20    1.70
 -10   4  -2   17.80    1.80
 -10   4  -2   18.60    1.90
 -10  -4   2   17.50    1.30
 -10   4  -2   14.50    1.40
 -11   4   2   88.99    3.80
 -11   4   2   88.69    3.60
 -11  -4  -2   81.79    3.80
 -11  -4  -2   82.99    3.40
 -11   4   2   93.39    4.30
 -11   4  -2   75.99    3.80
 -11   4  -2   75.79    3.40
 -11   4  -2   88.49    3.90
 -11  -4   2   83.29    2.90
 -11  -4   2   89.29    3.70
  11  -4  -2   88.29    3.70
 -12   4   2   44.50    2.70
 -12   4   2   43.80    3.10
 -12   4   2   43.80    2.80
 -12  -4  -2   49.50    3.20
 -12   4  -2   39.00    2.70
 -12   4  -2   45.30    3.10
 -12  -4   2   40.70    2.70
  12  -4  -2   48.00    2.90
 -12  -4   2   38.60    2.00
 -12   4  -2   43.70    2.70
   0  -5  -2  387.16    7.20
   0   5   2  381.36    6.70
   0  -5   2  394.46    7.40
   0  -5  -2  394.26    6.80
   0   5   2  394.46    7.50
   0   5  -2  401.36    6.30
   0   5  -2  391.36    6.90
   0   5   2  385.46    7.50
   0  -5   2  398.86    6.40
   0   5  -2  385.76    7.40
   0  -5   2  382.86    6.40
   1   5  -2  192.68    4.00
  -1  -5  -2  187.28    4.20
   1  -5   2  197.18    3.60
  -1  -5  -2  187.98    3.90
   1  -5   2  192.28    3.30
  -1   5   2  185.98    3.80
  -1   5   2  183.28    4.40
   1  -5   2  195.88    5.10
   1   5  -2  189.88    4.20
  -1   5   2  190.18    4.40
   1   5  -2  184.38    3.50
  -1  -5   2  195.38    4.40
   1   5   2  195.48    4.50
   1  -5  -2  197.28    4.30
  -1   5  -2  198.28    3.50
  -1  -5   2  202.78    3.60
  -1   5  -2  197.98    4.10
   1  -5  -2  196.08    4.70
   1   5   2  186.68    3.90
  -1   5  -2  198.28    4.60
   1  -5  -2  190.48    3.80
  -1  -5   2  197.78    3.50
  -2  -5  -2  691.23   12.10
   2   5  -2  694.63   11.20
   2  -5   2  717.23   12.40
   2  -5   2  701.63   10.70
  -2   5   2  702.53   12.20
  -2   5   2  673.03   11.40
  -2   5   2  717.33   11.90
   2  -5   2  710.63   11.20
  -2  -5  -2  701.93   11.70
   2   5  -2  706.63   11.80
  -2  -5  -2  703.73   12.00
  -2   5  -2  698.13   11.20
  -2  -5   2  704.03   11.10
  -2  -5   2  708.23   11.10
   2  -5  -2  712.43   12.30
   2  -5  -2  683.53   11.40
   2   5   2  691.43   12.10
   2  -5  -2  707.33   12.00
   2   5   2  692.43   11.50
  -2  -5   2  707.03   11.80
  -2   5  -2  731.63   11.80
  -2   5  -2  734.03   14.70
   3   5  -2   70.79    2.20
   3   5  -2   71.69    2.10
  -3   5   2   70.89    2.20
   3   5  -2   70.19    2.40
  -3   5   2   70.79    2.50
  -3   5   2   69.09    2.50
  -3  -5  -2   73.99    2.40
  -3   5   2   68.99    2.10
   3  -5   2   70.19    2.60
   3  -5   2   71.09    1.70
   3  -5   2   73.79    2.10
  -3  -5  -2   70.49    2.40
  -3  -5   2   69.49    2.20
  -3  -5   2   71.29    1.90
   3   5   2   72.59    2.20
  -3   5  -2   67.79    1.90
  -3   5  -2   66.89    2.50
  -3  -5   2   69.09    2.00
   3  -5  -2   70.19    2.50
  -3   5  -2   70.69    2.30
   3  -5  -2   66.59    2.00
   3  -5  -2   72.89    2.40
  -4   5   2   21.50    1.20
   4  -5   2   20.20    0.90
   4   5  -2   18.50    1.30
  -4  -5  -2   18.80    1.20
   4  -5   2   20.70    1.20
   4   5  -2   20.90    1.20
  -4  -5  -2   19.80    1.30
  -4   5   2   18.10    1.40
   4   5  -2   21.60    1.20
  -4   5   2   18.50    1.30
  -4  -5   2   19.80    1.10
   4   5   2   19.90    1.30
  -4   5  -2   21.50    1.50
  -4   5  -2   21.20    1.10
  -4   5  -2   18.00    1.30
   4  -5  -2   18.80    1.30
   4  -5  -2   19.50    1.10
   4   5   2   18.80    1.20
   4  -5  -2   21.10    1.40
  -4  -5   2   21.30    1.20
   4  -5  -2   18.90    1.00
  -5   5   2   61.29    2.50
   5  -5   2   61.99    2.20
  -5  -5  -2   59.59    2.40
   5  -5   2   61.39    1.90
   5   5  -2   64.39    2.50
   5   5  -2   60.19    2.10
  -5  -5  -2   60.59    2.30
  -5   5   2   59.19    2.50
  -5   5   2   59.99    2.30
   5  -5   2   59.29    1.80
   5   5  -2   61.89    2.30
   5   5   2   64.79    2.50
  -5   5  -2   69.99    2.80
   5   5   2   64.79    2.30
   5  -5  -2   63.79    2.50
  -5  -5   2   66.29    2.10
   5  -5  -2   64.89    2.60
   5  -5  -2   62.39    2.10
   5   5   2   64.89    2.50
  -5   5  -2   60.79    2.10
  -5  -5   2   64.09    2.20
  -5   5  -2   65.59    2.60
   5  -5  -2   59.79    2.10
  -6  -5  -2   12.50    1.30
   6  -5   2   14.10    0.90
   6   5  -2   17.40    1.40
  -6   5   2   15.70    1.50
  -6  -5  -2   15.80    1.30
   6   5  -2   15.90    1.20
   6  -5   2   16.10    1.30
  -6   5   2   13.60    1.30
  -6   5   2   14.50    1.20
   6  -5  -2   14.00    1.00
  -6   5  -2   16.30    1.20
   6  -5  -2   15.00    1.20
   6   5   2   14.90    1.20
  -6   5  -2   13.50    1.30
   6   5   2   15.10    1.30
  -6   5  -2   15.20    1.40
   6  -5  -2   13.70    1.20
  -6  -5   2   12.90    1.10
  -6  -5   2   15.00    1.10
   7  -5   2  193.28    4.70
  -7   5   2  192.88    5.30
   7   5  -2  201.98    5.30
   7   5  -2  200.68    5.10
  -7  -5  -2  192.78    5.20
  -7   5   2  202.08    5.70
   7  -5   2  196.08    4.40
  -7  -5  -2  193.08    5.00
  -7   5   2  193.58    5.10
   7   5  -2  198.88    5.50
   7  -5   2  202.28    5.10
  -7   5  -2  202.68    5.50
  -7   5  -2  196.48    4.80
   7  -5  -2  190.58    5.30
   7  -5  -2  194.48    4.90
   7   5   2  191.58    6.10
   7  -5  -2  198.08    4.70
   7   5   2  195.38    5.00
  -7  -5   2  186.48    4.80
  -7   5  -2  197.28    5.60
  -7  -5   2  197.58    4.50
  -8  -5  -2    7.00    1.20
  -8  -5  -2    6.70    1.00
   8   5  -2    4.40    0.90
   8   5  -2    4.80    0.90
   8   5  -2    3.10    0.80
  -8   5   2    6.10    1.10
   8  -5   2    8.40    1.10
  -8   5   2    7.80    1.50
  -8   5   2    5.90    1.10
   8  -5   2    5.50    1.00
   8  -5   2    5.80    0.80
   8  -5  -2    6.30    0.90
  -8   5  -2    5.20    1.20
   8  -5  -2    6.80    1.20
   8   5   2    6.60    1.20
   8  -5  -2    6.40    1.00
   8   5   2    5.40    1.10
  -8  -5   2    6.40    1.00
  -8  -5   2    5.60    0.90
  -8   5  -2    6.20    1.00
  -8   5  -2    6.70    1.30
  -9  -5  -2   99.59    3.80
   9  -5   2   83.89    3.30
   9  -5   2   92.39    3.60
  -9   5   2   95.29    4.00
  -9   5   2   92.49    3.60
  -9   5   2   94.09    3.70
  -9  -5  -2   94.09    3.40
  -9  -5   2   92.39    2.90
  -9   5  -2   87.49    3.30
   9  -5  -2   95.69    3.50
   9  -5  -2   96.99    3.90
  -9   5  -2   95.49    4.00
  -9  -5   2   90.59    3.50
  -9   5  -2   89.39    3.80
 -10  -5  -2   35.60    2.40
 -10   5   2   41.70    2.70
 -10   5   2   43.30    2.50
 -10  -5  -2   37.20    2.10
  10  -5   2   36.20    1.90
 -10   5   2   37.30    2.30
 -10  -5   2   38.60    1.90
 -10   5  -2   40.30    2.30
 -10   5  -2   37.10    2.50
  10  -5  -2   38.30    2.30
 -10  -5   2   40.60    2.30
 -10   5  -2   37.80    2.60
 -11   5   2  158.78    5.80
 -11  -5  -2  152.48    5.40
 -11   5   2  157.98    5.40
 -11  -5  -2  149.19    5.50
 -11   5   2  162.48    5.30
 -11  -5   2  151.48    4.20
 -11  -5   2  161.08    5.20
 -11   5  -2  157.38    5.60
 -11   5  -2  156.98    5.10
  11  -5  -2  149.39    5.00
 -11   5  -2  151.28    5.70
 -12   5   2   19.10    2.00
  12  -5   2   22.30    2.00
 -12   5   2   20.80    2.00
 -12   5   2   15.20    2.80
 -12  -5  -2   20.00    2.30
 -12   5  -2   19.70    1.90
 -12  -5   2   18.40    1.60
 -12   5  -2   21.20    3.80
  12  -5  -2   25.50    2.10
 -12  -5   2   21.10    2.00
 -12   5  -2   20.00    2.10
   0   6   2  129.19    3.60
   0   6   2  136.49    3.10
   0  -6   2  126.09    2.70
   0   6  -2  128.69    3.60
   0  -6   2  125.89    2.70
   0   6  -2  131.89    2.70
   0  -6   2  126.69    3.60
   0  -6  -2  135.69    3.10
   0  -6  -2  131.99    4.80
   0   6   2  134.39    3.70
   0   6  -2  127.29    3.30
   0  -6  -2  124.89    3.60
   1   6  -2  402.36    6.80
   1  -6   2  404.46    6.60
  -1   6   2  400.46    8.00
   1  -6   2  412.26    8.20
  -1  -6  -2  404.76    8.00
  -1   6   2  407.86    8.00
  -1   6   2  403.86    7.20
  -1  -6  -2  414.16    7.40
   1  -6   2  408.76    6.90
   1   6  -2  402.36    7.50
  -1   6  -2  399.76    6.70
   1  -6  -2  400.36    7.10
  -1  -6   2  411.26    6.80
  -1   6  -2  400.36    8.10
  -1  -6   2  408.96    6.80
  -1   6  -2  411.66    7.60
  -1  -6   2  404.96    7.90
   1  -6  -2  408.36    8.10
   1  -6  -2  421.66    7.90
   1   6   2  414.66    8.00
  -2   6   2    2.20    0.60
   2  -6   2    1.80    0.50
  -2  -6  -2    2.30    0.60
  -2   6   2    2.50    0.50
  -2   6   2    2.20    0.40
  -2   6   2    2.40    0.70
   2   6  -2    2.50    0.60
  -2  -6  -2    2.40    0.60
   2   6  -2    2.00    0.40
  -2  -6  -2    2.50    0.50
   2  -6   2    1.80    0.30
   2  -6   2    1.70    0.40
  -2  -6   2    2.60    0.60
   2  -6  -2    2.80    0.60
   2  -6  -2    2.70    0.50
  -2  -6   2    1.80    0.40
   2   6   2    1.70    0.60
   2   6   2    2.00    0.50
  -2   6  -2    2.30    0.40
   2  -6  -2    3.40    0.70
  -2  -6   2    2.70    0.40
  -2   6  -2    2.10    0.50
  -2   6  -2    2.30    0.40
  -2   6  -2    2.20    0.60
  -3   6   2  258.27    6.00
  -3  -6  -2  259.47    5.80
   3   6  -2  266.37    5.20
   3   6  -2  272.37    5.90
   3  -6   2  256.77    6.20
  -3   6   2  251.07    6.00
   3  -6   2  258.77    4.60
   3   6  -2  262.97    5.60
  -3  -6  -2  256.07    5.70
  -3   6   2  262.97    5.40
   3  -6   2  253.97    5.10
  -3  -6  -2  258.87    5.60
   3  -6  -2  259.87    5.70
  -3  -6   2  252.87    5.50
   3   6   2  252.97    5.80
  -3   6  -2  259.37    5.00
   3  -6  -2  259.77    6.00
  -3  -6   2  253.87    4.80
  -3   6  -2  245.68    6.00
  -3  -6   2  254.47    4.90
  -3   6  -2  256.27    5.60
   3   6   2  254.77    5.20
   3  -6  -2  253.17    5.00
  -4  -6  -2  510.25    9.50
  -4  -6  -2  497.15    9.30
   4   6  -2  510.15    9.70
   4   6  -2  497.85    8.90
   4  -6   2  481.75    8.30
  -4   6   2  503.05    9.80
  -4   6   2  496.95    9.10
  -4   6   2  490.45    9.80
   4  -6   2  493.05   10.10
   4   6  -2  484.35    9.90
   4  -6  -2  505.65   10.00
   4  -6  -2  504.05    9.60
  -4   6  -2  506.95    8.90
   4   6   2  515.25    9.80
   4   6   2  502.55    9.20
   4  -6  -2  500.55    8.90
  -4   6  -2  511.65    9.70
  -4  -6   2  500.45    8.80
  -4   6  -2  504.05   10.10
  -4  -6   2  508.65    9.20
  -4  -6   2  506.75    8.90
  -5  -6  -2   45.80    2.10
   5   6  -2   42.40    2.10
  -5   6   2   44.50    2.30
   5   6  -2   42.60    1.90
  -5   6   2   40.20    1.90
   5  -6   2   42.70    1.60
   5  -6   2   46.20    2.00
  -5   6   2   42.20    2.20
   5   6  -2   43.70    1.90
  -5  -6  -2   40.40    2.00
   5   6   2   45.00    2.20
   5  -6  -2   47.70    2.20
   5  -6  -2   43.60    1.80
  -5  -6   2   42.80    1.90
   5   6   2   43.80    2.20
  -5  -6   2   43.10    1.80
   5  -6  -2   49.30    2.40
  -5   6  -2   43.70    2.20
   5   6   2   43.70    1.90
  -5   6  -2   43.50    2.30
  -5   6  -2   42.80    1.80
   6  -6   2  236.58    5.50
   6  -6   2  228.48    5.00
   6  -6   2  233.88    4.80
  -6  -6  -2  236.08    5.70
   6   6  -2  230.78    5.50
  -6   6   2  228.08    5.90
   6   6  -2  234.28    6.00
  -6   6   2  226.98    6.10
  -6  -6  -2  226.68    5.50
  -6   6   2  223.68    5.50
   6   6  -2  232.88    5.30
   6  -6  -2  229.68    5.10
   6  -6  -2  233.28    5.30
  -6   6  -2  227.98    5.90
  -6   6  -2  226.28    6.20
   6  -6  -2  239.48    5.90
   6   6   2  241.88    7.00
  -6  -6   2  236.58    5.20
   6  -6  -2  237.08    6.20
   6   6   2  227.08    5.80
   6   6   2  239.78    5.60
  -6  -6   2  230.88    5.20
  -6   6  -2  232.38    5.30
  -7   6   2  222.28    5.70
   7  -6   2  222.78    4.90
  -7   6   2  231.48    6.20
   7   6  -2  228.48    5.70
   7  -6   2  224.68    5.60
  -7  -6  -2  230.38    5.90
   7  -6   2  235.68    5.20
  -7   6   2  223.68    6.30
  -7  -6  -2  233.98    5.70
   7   6  -2  228.68    6.10
   7  -6  -2  222.48    5.40
   7   6   2  225.88    6.10
  -7   6  -2  223.48    6.10
  -7  -6   2  227.88    5.40
   7  -6  -2  224.08    5.90
  -7   6  -2  234.98    5.50
  -7   6  -2  223.88    6.30
  -7  -6   2  230.38    5.20
   7  -6  -2  226.98    5.30
   7   6   2  221.98    5.60
   8  -6   2   46.30    2.40
  -8   6   2   40.50    3.10
   8  -6   2   42.20    1.80
  -8  -6  -2   43.40    2.20
   8  -6   2   42.00    2.00
  -8   6   2   41.80    2.30
  -8   6   2   40.20    2.40
  -8  -6  -2   40.00    2.30
   8  -6  -2   41.80    2.20
  -8   6  -2   40.90    2.10
  -8  -6   2   40.10    2.10
   8  -6  -2   39.90    1.90
   8  -6  -2   40.40    2.40
  -8   6  -2   37.40    2.40
  -8  -6   2   39.30    1.90
  -8   6  -2   41.70    2.60
  -9  -6  -2   26.50    2.00
   9  -6   2   24.00    1.90
   9  -6   2   28.50    1.60
   9  -6   2   25.40    1.70
  -9   6   2   27.40    2.30
  -9   6   2   27.30    2.00
  -9   6   2   24.50    1.90
  -9  -6  -2   25.80    1.80
  -9  -6   2   27.60    1.90
  -9   6  -2   29.10    2.20
  -9   6  -2   28.00    2.20
  -9   6  -2   30.80    1.90
  -9  -6   2   25.50    1.60
   9  -6  -2   27.20    1.90
 -10   6   2   18.90    1.80
 -10  -6  -2   16.60    1.60
 -10  -6  -2   17.60    1.80
 -10   6   2   17.60    2.20
 -10   6   2   19.80    1.80
  10  -6   2   15.80    1.50
 -10   6  -2   18.60    1.90
 -10  -6   2   20.30    1.70
 -10  -6   2   18.00    1.40
 -10   6  -2   15.00    2.00
  10  -6  -2   17.80    1.60
 -11   6   2   49.80    2.90
 -11   6   2   49.20    3.20
 -11  -6  -2   46.60    2.90
 -11   6   2   43.60    2.80
  11  -6   2   45.90    2.50
 -11  -6   2   42.10    2.60
  11  -6  -2   48.50    2.70
 -11  -6   2   41.60    2.20
 -11   6  -2   47.80    2.70
 -11   6  -2   41.50    2.90
 -11   6  -2   48.30    3.00
  12  -6   2   97.99    3.90
 -12   6   2  105.59    4.60
 -12  -6  -2   92.59    4.30
 -12   6   2   98.89    4.30
 -12   6   2  106.19    5.00
 -12   6  -2  101.39    4.60
 -12   6  -2   95.89    4.00
 -12  -6   2   99.59    4.20
 -12  -6   2   88.69    3.90
 -12   6  -2   97.19    4.70
  12  -6  -2  101.49    4.10
   0   7   2    0.80    0.30
   0   7   2    0.20    0.40
   0   7  -2    0.80    0.40
   0   7  -2    0.40    0.40
   0  -7   2    0.70    0.40
   0  -7   2    0.60    0.30
   0   7  -2    0.90    0.30
   0   7   2    0.60    0.50
   0  -7   2    0.80    0.30
   0  -7  -2    1.10    0.40
   0  -7  -2    0.20    0.40
   1  -7   2  364.16    6.40
   1  -7   2  354.36    6.20
  -1  -7  -2  376.06    7.70
   1   7  -2  355.86    6.40
   1  -7   2  372.16    7.90
  -1   7   2  363.96    6.80
  -1   7   2  365.16    7.70
  -1  -7  -2  377.36    7.30
  -1   7   2  359.86    7.70
   1   7  -2  361.86    7.50
  -1  -7  -2  359.56    6.90
  -1  -7   2  362.86    7.50
   1   7   2  364.46    6.70
   1  -7  -2  348.77    6.60
  -1  -7   2  358.76    6.20
   1   7   2  369.46    7.70
  -1   7  -2  349.17    6.20
  -1  -7   2  357.96    6.20
   1  -7  -2  376.86    7.30
   1  -7  -2  355.66    7.70
  -1   7  -2  358.26    7.70
  -1   7  -2  358.26    8.00
  -2  -7  -2   27.80    1.60
  -2   7   2   27.10    1.30
   2  -7   2   28.80    1.00
   2  -7   2   28.20    1.80
  -2   7   2   24.60    1.30
  -2   7   2   26.30    1.70
   2   7  -2   29.70    1.60
  -2  -7  -2   27.00    1.70
  -2   7   2   25.30    1.70
   2   7  -2   27.30    1.20
   2  -7   2   29.10    1.20
  -2  -7  -2   26.20    1.40
   2   7   2   24.80    1.30
  -2   7  -2   28.90    1.60
   2  -7  -2   27.10    1.60
  -2   7  -2   22.70    1.60
  -2  -7   2   26.80    1.10
   2  -7  -2   27.80    1.70
  -2  -7   2   27.50    1.10
  -2  -7   2   27.70    1.60
   2   7   2   26.40    1.70
  -2   7  -2   28.60    1.30
  -2   7  -2   26.20    1.10
   3  -7   2  255.27    5.20
  -3  -7  -2  259.47    5.70
   3   7  -2  244.88    5.70
  -3   7   2  250.07    5.30
   3  -7   2  252.27    4.60
  -3   7   2  256.67    5.50
   3   7  -2  248.28    5.10
  -3  -7  -2  258.57    6.00
  -3   7   2  247.08    6.20
  -3  -7  -2  260.27    5.80
  -3  -7  -2  260.57    5.60
  -3   7   2  259.47    6.20
   3  -7  -2  251.47    5.80
  -3  -7   2  253.57    5.00
   3   7   2  255.77    6.10
  -3   7  -2  260.17    6.40
  -3   7  -2  259.27    5.20
  -3  -7   2  263.27    5.90
   3  -7  -2  259.67    5.20
   3   7   2  264.47    5.40
  -3   7  -2  256.67    5.90
  -3  -7   2  257.27    5.00
   3  -7  -2  270.77    6.40
   4  -7   2  294.77    6.00
   4   7  -2  311.37    6.90
  -4   7   2  295.77    6.30
  -4   7   2  287.87    6.90
  -4  -7  -2  297.07    6.40
  -4  -7  -2  308.17    6.70
   4   7  -2  282.47    6.30
  -4   7   2  291.77    7.00
   4  -7   2  296.57    5.40
  -4  -7  -2  301.47    6.60
   4   7  -2  303.87    6.10
  -4   7  -2  298.07    6.00
  -4  -7   2  293.27    5.70
   4   7   2  294.17    6.10
   4  -7  -2  290.27    7.00
   4  -7  -2  291.37    5.90
   4   7   2  296.57    6.80
  -4  -7   2  299.07    5.80
  -4  -7   2  292.57    6.40
  -4   7  -2  290.67    6.60
   4  -7  -2  291.17    6.60
   5   7  -2  319.87    7.30
   5   7  -2  311.37    6.60
  -5  -7  -2  312.67    7.10
  -5  -7  -2  318.87    6.90
  -5   7   2  320.47    7.50
   5   7  -2  314.07    6.80
   5  -7   2  315.67    6.60
  -5   7   2  306.67    6.70
  -5   7   2  320.97    7.60
   5  -7   2  312.77    5.90
  -5   7  -2  324.07    7.40
   5  -7  -2  310.47    6.40
  -5   7  -2  326.07    7.70
   5   7   2  316.77    7.20
   5  -7  -2  314.57    7.10
  -5  -7   2  322.77    6.80
  -5  -7   2  327.87    6.60
  -5   7  -2  314.17    6.50
   5  -7  -2  317.97    7.70
  -5  -7   2  310.77    6.30
   5   7   2  325.27    6.80
   6   7  -2  371.56    7.70
   6  -7   2  378.26    7.70
  -6  -7  -2  375.46    8.00
   6   7  -2  371.96    7.80
  -6   7   2  372.26    8.60
  -6  -7  -2  375.36    8.10
  -6   7   2  370.66    8.50
   6   7  -2  358.36    8.30
   6  -7   2  364.86    7.00
  -6   7   2  364.86    7.90
   6   7   2  382.16    8.30
  -6   7  -2  379.56    8.50
   6   7   2  353.96    8.40
   6   7   2  358.26    7.70
  -6  -7   2  385.56    7.70
   6  -7  -2  375.36    7.50
  -6  -7   2  386.56    7.50
   6  -7  -2  373.16    8.70
  -6   7  -2  358.66    8.70
  -6   7  -2  365.96    7.60
   6  -7  -2  372.56    8.20
  -6  -7   2  375.36    7.40
   7  -7   2  200.28    4.60
   7   7  -2  195.38    5.20
   7  -7   2  194.88    5.10
  -7   7   2  194.48    6.00
  -7   7   2  198.08    5.40
  -7  -7  -2  195.08    5.40
  -7   7   2  199.18    5.80
  -7  -7  -2  196.98    5.30
   7  -7  -2  195.28    5.50
   7  -7  -2  195.38    4.90
  -7  -7   2  197.78    4.90
  -7   7  -2  188.38    5.70
  -7  -7   2  186.28    4.80
  -7   7  -2  192.88    5.00
  -7   7  -2  192.48    5.90
  -8  -7  -2   -0.20    0.60
   8  -7   2    0.80    0.60
  -8   7   2    0.20    0.60
  -8   7   2    0.10    0.50
  -8  -7  -2   -0.10    0.50
  -8   7   2    0.90    0.60
   8  -7   2   -0.10    0.40
  -8   7  -2    0.40    0.70
  -8  -7   2    0.20    0.50
  -8   7  -2   -0.30    0.70
  -8  -7   2    0.20    0.50
  -8   7  -2    0.50    0.50
   8  -7  -2   -0.30    0.40
  -9   7   2    4.50    1.10
  -9   7   2    4.90    1.30
  -9  -7  -2    4.90    0.90
  -9   7   2    2.60    0.90
   9  -7   2    3.70    0.80
   9  -7   2    2.40    0.60
  -9   7  -2    2.80    1.00
  -9   7  -2    3.40    0.90
   9  -7  -2    3.90    0.90
  -9  -7   2    3.50    0.90
  -9  -7   2    3.60    0.70
  -9   7  -2    3.90    1.20
 -10   7   2    1.90    0.90
  10  -7   2    1.80    0.60
 -10   7   2    4.10    0.90
 -10  -7  -2    3.60    1.00
 -10   7   2    2.00    1.20
 -10  -7   2    4.40    1.00
  10  -7  -2    3.80    0.90
 -10  -7   2    1.80    0.70
 -10   7  -2    2.60    1.10
 -10   7  -2    2.40    0.90
 -11   7   2   32.30    2.50
 -11   7   2   40.70    3.90
 -11  -7  -2   37.00    2.60
  11  -7   2   36.20    2.20
 -11   7   2   39.40    2.60
 -11   7  -2   34.80    2.80
 -11  -7   2   36.90    2.30
 -11  -7   2   30.00    3.30
 -11   7  -2   33.70    2.30
 -11   7  -2   33.40    2.70
  11  -7  -2   33.90    2.30
   0  -8  -2  133.49    4.20
   0   8  -2  143.09    3.10
   0  -8   2  135.69    3.20
   0  -8  -2  141.19    3.80
   0  -8   2  140.69    4.30
   0   8  -2  130.59    3.90
   0  -8   2  132.19    3.00
   0   8  -2  133.79    4.10
   0  -8  -2  137.79    3.40
   0   8   2  139.89    3.50
   0   8   2  132.39    4.20
  -1   8   2  279.27    6.80
  -1  -8  -2  277.27    5.80
  -1   8   2  278.17    6.70
   1   8  -2  283.87    5.30
  -1  -8  -2  294.47    6.20
   1  -8   2  273.57    6.70
  -1  -8  -2  287.97    6.70
   1   8  -2  277.87    6.50
  -1   8   2  277.77    5.70
   1  -8   2  280.97    5.30
   1  -8   2  279.87    5.20
  -1  -8   2  273.17    6.50
   1  -8  -2  278.97    6.80
  -1   8  -2  285.47    6.80
  -1   8  -2  276.57    5.20
   1  -8  -2  286.67    6.20
  -1  -8   2  275.87    5.10
   1   8   2  285.77    5.70
   1   8   2  285.47    6.70
  -1   8  -2  266.77    6.20
   1  -8  -2  278.07    5.60
   2  -8   2  289.27    5.20
   2   8  -2  282.27    6.50
  -2   8   2  296.97    6.90
  -2  -8  -2  283.87    6.80
   2   8  -2  292.97    5.60
  -2  -8  -2  288.87    6.30
  -2   8   2  281.87    6.90
   2  -8   2  289.07    5.50
  -2   8   2  281.07    5.90
  -2  -8  -2  287.87    6.20
  -2   8   2  290.27    6.00
  -2   8  -2  287.17    5.70
   2  -8  -2  285.47    7.00
   2  -8  -2  287.87    5.70
   2   8   2  292.97    6.90
  -2   8  -2  288.57    5.40
  -2  -8   2  291.37    5.40
  -2  -8   2  294.97    5.30
   2   8   2  294.67    5.90
  -2   8  -2  285.87    6.40
  -2   8  -2  279.27    6.90
  -2  -8   2  290.87    6.70
   2  -8  -2  294.17    6.40
  -3  -8  -2   57.09    2.40
   3   8  -2   50.99    2.30
  -3   8   2   52.79    2.10
  -3  -8  -2   55.39    2.30
  -3   8   2   49.70    2.10
  -3   8   2   53.29    2.70
  -3   8   2   53.19    2.70
   3   8  -2   56.09    2.00
  -3  -8  -2   51.49    2.30
   3  -8   2   53.99    1.60
  -3  -8  -2   52.79    2.50
   3  -8   2   56.09    2.00
  -3   8  -2   53.49    2.40
   3   8   2   57.69    2.10
   3  -8  -2   58.99    2.40
  -3  -8   2   59.79    2.50
  -3  -8   2   52.79    1.80
   3  -8  -2   57.89    3.20
   3   8   2   49.50    2.50
  -3   8  -2   54.29    2.00
   3  -8  -2   55.19    2.00
  -3  -8   2   60.19    1.90
  -3   8  -2   52.89    2.70
  -4   8   2  159.08    4.30
   4  -8   2  161.68    5.10
  -4  -8  -2  157.58    4.70
  -4   8   2  165.68    5.00
   4   8  -2  164.98    5.10
  -4  -8  -2  158.48    4.30
   4  -8   2  162.28    3.40
  -4  -8  -2  161.38    4.50
  -4   8   2  155.88    4.90
   4  -8   2  157.48    3.90
   4   8  -2  157.48    4.00
   4   8  -2  160.78    4.50
  -4   8  -2  167.68    5.10
  -4  -8   2  164.78    3.80
   4   8   2  165.18    4.90
   4   8   2  166.78    4.20
  -4   8  -2  163.58    4.10
   4  -8  -2  163.08    3.90
   4  -8  -2  160.88    4.50
  -4   8  -2  156.18    4.70
  -4  -8   2  163.78    4.50
  -4  -8   2  161.68    3.70
   4  -8  -2  165.48    5.10
   5  -8   2   28.60    1.60
  -5  -8  -2   26.90    1.80
   5   8  -2   26.90    1.80
  -5  -8  -2   30.30    1.90
  -5   8   2   26.40    2.10
   5   8  -2   26.80    1.90
  -5   8   2   26.30    2.00
   5   8  -2   25.10    1.50
  -5  -8  -2   26.80    1.80
   5  -8   2   26.00    1.20
  -5   8   2   26.50    1.70
  -5   8  -2   22.20    1.80
   5   8   2   23.70    1.60
  -5   8  -2   26.20    1.50
  -5  -8   2   28.40    1.70
  -5   8  -2   26.80    2.10
   5  -8  -2   27.30    2.10
   5  -8  -2   26.60    1.50
  -5  -8   2   25.50    1.40
   5   8   2   26.30    1.90
   5   8   2   26.10    1.90
  -5  -8   2   23.90    1.40
   5  -8  -2   25.90    1.70
  -6  -8  -2   43.20    2.30
  -6  -8  -2   43.20    2.30
   6   8  -2   45.40    2.30
   6  -8   2   40.90    2.00
  -6   8   2   42.00    2.60
  -6   8   2   40.30    2.60
   6   8  -2   40.40    2.10
   6  -8   2   41.40    1.70
  -6   8   2   40.20    2.20
  -6  -8  -2   39.90    2.20
  -6   8  -2   43.70    2.60
  -6  -8   2   47.20    2.20
  -6  -8   2   47.20    2.00
   6   8   2   45.20    2.20
  -6   8  -2   45.30    2.10
   6   8   2   41.80    2.40
  -6   8  -2   43.80    2.70
  -6  -8   2   44.20    2.00
   6  -8  -2   42.50    2.00
   6  -8  -2   44.30    2.40
   6  -8  -2   46.50    3.50
   7   8  -2  229.78    5.80
   7  -8   2  225.08    5.00
  -7   8   2  211.58    5.80
   7  -8   2  220.98    5.60
  -7   8   2  230.68    6.70
  -7   8   2  216.78    7.20
  -7  -8  -2  225.98    6.00
  -7  -8  -2  222.48    5.90
   7  -8  -2  220.78    5.30
  -7   8  -2  220.68    6.70
  -7  -8   2  226.28    5.30
  -7   8  -2  228.88    6.70
  -7  -8   2  217.68    5.40
   7   8   2  224.28    6.20
  -7  -8   2  224.88    5.60
   7  -8  -2  215.88    6.00
  -7   8  -2  222.08    5.60
  -8   8   2   91.59    4.20
  -8   8   2  101.19    3.80
   8  -8   2   94.39    3.40
   8  -8   2   94.79    3.00
  -8  -8  -2   93.19    3.70
  -8   8   2   98.99    4.20
  -8  -8  -2   94.89    3.70
  -8   8  -2   98.19    4.20
  -8  -8   2  105.09    3.40
  -8   8  -2   99.09    4.30
   8  -8  -2   96.59    3.40
  -8   8  -2   94.19    3.50
  -8  -8   2   93.99    3.30
  -8  -8   2   99.99    3.50
   9  -8   2   12.60    1.20
  -9   8   2   16.10    1.80
  -9  -8  -2   14.10    1.50
  -9   8   2   13.20    1.70
  -9   8   2   12.50    1.90
  -9  -8   2   12.00    1.30
  -9   8  -2   12.50    1.90
  -9   8  -2   12.40    1.80
  -9  -8   2   12.20    1.30
  -9   8  -2   11.10    1.70
 -10  -8  -2   12.00    1.60
 -10   8   2    7.90    1.60
  10  -8   2    9.70    1.20
 -10   8   2    6.50    1.40
 -10   8   2    8.90    1.40
  10  -8  -2   10.40    1.40
 -10   8  -2    6.80    1.50
 -10   8  -2    9.60    1.90
 -10   8  -2    8.80    1.40
 -10  -8   2    9.90    1.40
 -10  -8   2   11.50    1.50
  11  -8   2    3.80    0.90
 -11   8   2    3.20    0.90
 -11  -8  -2    5.50    1.30
 -11   8   2    3.00    1.30
 -11   8   2    4.30    1.20
 -11   8  -2    2.90    1.10
 -11   8  -2    3.90    1.40
  11  -8  -2    5.40    1.10
 -11  -8   2    2.50    1.20
 -11   8  -2    4.20    1.00
 -11  -8   2    5.20    1.10
   0  -9   2    4.00    0.60
   0   9  -2    4.00    0.70
   0  -9  -2    3.60    0.80
   0  -9   2    3.50    0.60
   0  -9  -2    3.60    0.80
   0   9   2    4.00    1.00
   0   9  -2    3.60    0.90
   0   9  -2    3.30    0.90
   0  -9  -2    3.70    0.70
   0   9   2    4.80    0.80
   1  -9   2   25.80    1.20
  -1  -9  -2   26.80    1.50
   1  -9   2   23.70    1.20
   1   9  -2   28.70    1.90
  -1   9   2   27.30    2.00
  -1   9   2   32.00    2.20
   1   9  -2   26.30    1.20
  -1  -9  -2   24.50    1.90
   1  -9   2   24.80    1.90
  -1  -9  -2   28.90    1.70
  -1   9   2   25.60    1.40
  -1   9  -2   25.90    1.80
   1   9   2   27.70    2.00
  -1   9  -2   22.50    1.80
   1   9   2   24.30    1.40
   1  -9  -2   25.50    1.90
   1  -9  -2   24.20    1.60
   1  -9  -2   25.10    1.40
  -1   9  -2   23.80    1.10
  -1  -9   2   23.80    1.80
  -2   9   2   57.99    2.20
  -2   9   2   56.79    2.30
   2  -9   2   53.09    2.80
   2  -9   2   62.69    2.00
  -2  -9  -2   62.49    2.50
   2   9  -2   58.09    2.70
  -2   9   2   55.09    2.80
  -2   9   2   57.99    2.90
   2   9  -2   62.39    2.10
   2  -9   2   64.09    1.90
  -2  -9  -2   61.09    2.90
  -2  -9  -2   58.99    2.40
   2   9   2   64.59    2.90
   2  -9  -2   60.79    3.00
  -2   9  -2   57.79    1.90
  -2   9  -2   61.99    3.00
   2  -9  -2   59.79    2.50
  -2   9  -2   59.09    2.20
  -2   9  -2   60.49    2.70
   2  -9  -2   60.29    2.10
  -2  -9   2   60.19    2.80
   2   9   2   61.19    2.30
  -3  -9  -2   59.29    2.40
   3  -9   2   57.39    1.70
   3   9  -2   57.09    2.70
  -3   9   2   51.19    2.30
   3   9  -2   55.99    2.10
  -3   9   2   54.29    2.80
  -3  -9  -2   61.79    2.50
  -3  -9  -2   55.69    2.50
  -3  -9  -2   57.89    2.80
  -3   9   2   55.79    2.20
   3  -9   2   56.09    3.00
  -3   9   2   58.29    2.90
  -3  -9   2   56.89    1.80
   3   9   2   55.09    2.20
   3   9   2   52.49    2.70
   3  -9  -2   56.09    2.50
  -3   9  -2   55.99    2.20
  -3  -9   2   63.89    2.80
  -3   9  -2   57.39    2.90
  -3   9  -2   57.79    2.70
   3  -9  -2   55.99    2.90
   3  -9  -2   55.69    2.00
  -4   9   2   37.10    1.90
   4   9  -2   34.30    2.10
  -4  -9  -2   36.00    2.20
   4  -9   2   38.10    1.70
   4  -9   2   36.50    1.40
   4   9  -2   38.90    2.20
  -4   9   2   35.80    2.40
  -4  -9  -2   35.10    2.00
   4   9  -2   36.70    1.70
  -4   9   2   35.70    2.30
  -4  -9  -2   34.20    1.90
  -4   9  -2   39.40    2.30
   4   9   2   39.80    1.90
  -4  -9   2   37.40    2.10
   4   9   2   35.10    2.30
  -4  -9   2   37.50    1.60
  -4   9  -2   33.30    2.30
  -4  -9   2   40.80    1.60
  -4   9  -2   41.70    1.90
   4  -9  -2   34.80    2.00
   4  -9  -2   36.30    1.70
  -5   9   2   13.60    2.50
  -5   9   2   18.40    2.40
   5   9  -2   17.00    2.20
   5  -9   2   18.40    1.30
  -5  -9  -2   19.00    1.60
   5   9  -2   18.00    1.60
  -5  -9  -2   16.80    1.60
  -5   9   2   18.70    1.50
  -5  -9  -2   17.80    1.50
  -5  -9   2   21.90    1.30
   5   9   2   17.90    1.70
   5   9   2   18.00    1.40
  -5  -9   2   20.50    1.60
  -5  -9   2   19.20    1.20
  -5   9  -2   16.50    1.30
  -5   9  -2   20.50    1.90
   5  -9  -2   19.50    1.60
  -5   9  -2   19.30    1.70
   5  -9  -2   18.90    1.30
   6  -9   2   12.30    1.10
   6   9  -2   13.70    1.40
   6   9  -2   11.30    1.30
  -6  -9  -2   14.70    1.60
  -6   9   2   11.50    1.70
   6  -9   2   13.00    1.00
  -6  -9  -2   14.80    1.60
  -6   9   2   11.00    1.60
  -6   9   2   10.60    1.40
  -6  -9  -2   15.60    1.50
   6  -9  -2   12.30    1.10
  -6   9  -2   12.00    1.70
   6   9   2   12.50    1.70
  -6  -9   2   12.90    1.30
  -6   9  -2   13.80    1.30
   6  -9  -2   13.50    1.30
  -6  -9   2   12.70    1.10
  -6  -9   2   11.30    1.10
  -7   9   2    0.40    0.60
  -7   9   2    1.00    0.70
   7  -9   2    0.20    0.40
  -7  -9  -2    0.40    0.60
  -7  -9  -2    0.50    0.70
  -7   9   2    0.60    0.70
   7  -9   2    0.50    0.60
   7   9  -2   -0.40    0.50
  -7  -9   2    0.80    0.60
  -7  -9   2    0.50    0.60
  -7  -9   2    0.50    0.50
  -7   9  -2    0.60    0.50
  -7   9  -2    0.00    0.60
   7  -9  -2    0.20    0.50
  -7   9  -2    0.00    0.60
   7   9   2    0.30    0.70
  -8   9   2  188.58    6.30
  -8   9   2  185.48    5.60
   8  -9   2  187.58    4.50
   8  -9   2  177.28    5.00
  -8  -9  -2  181.48    5.50
  -8   9   2  182.38    6.10
  -8  -9   2  182.08    4.80
   8  -9  -2  188.08    5.00
  -8  -9   2  190.98    5.30
  -8   9  -2  180.88    6.30
  -8   9  -2  183.08    6.00
  -8   9  -2  180.38    6.10
  -8  -9   2  177.38    4.80
   9  -9   2    2.30    0.60
  -9   9   2    2.30    0.90
  -9   9   2    2.30    0.90
  -9   9   2    1.60    1.20
  -9  -9  -2    3.00    0.90
  -9   9  -2    3.80    1.40
  -9   9  -2    1.50    0.80
  -9   9  -2    1.80    0.70
  -9  -9   2    3.10    0.80
  -9  -9   2    1.60    0.90
   9  -9  -2    2.00    0.70
 -10   9   2    8.50    1.40
 -10  -9  -2    8.30    1.40
 -10   9   2    9.40    1.90
 -10   9   2    8.50    1.70
  10  -9   2    8.50    1.20
 -10   9  -2    6.30    1.20
 -10   9  -2    8.20    2.30
  10  -9  -2    8.20    1.20
 -10  -9   2    6.30    1.30
 -10  -9   2    8.40    1.10
 -10  -9   2    2.70    1.30
 -10   9  -2    6.10    1.70
   0 -10   2    4.70    0.70
   0 -10  -2    5.60    0.90
   0 -10   2    3.30    0.90
   0  10   2    4.40    1.10
   0  10  -2    4.60    0.60
   0 -10  -2    2.90    0.80
   0  10   2    4.30    0.70
   0  10  -2    4.60    1.00
   0  10  -2    3.80    1.00
   1 -10   2   59.99    2.00
  -1  10   2   59.99    3.10
  -1 -10  -2   67.09    2.60
  -1 -10  -2   60.59    2.50
  -1  10   2   61.99    2.30
  -1  10   2   63.79    2.50
   1  10  -2   62.09    2.10
  -1  10   2   66.69    3.20
   1  10  -2   64.59    3.10
   1  10   2   59.49    3.00
  -1  10  -2   66.09    3.20
  -1 -10   2   59.79    3.00
  -1  10  -2   64.59    2.00
   1 -10  -2   61.59    2.50
   1 -10  -2   60.89    2.30
   1  10   2   62.29    2.30
  -1  10  -2   63.29    2.90
  -2  10   2   31.50    2.30
   2  10  -2   32.30    1.50
  -2  10   2   27.40    1.60
   2 -10   2   29.00    1.30
  -2 -10  -2   32.20    1.80
  -2  10   2   31.20    1.80
  -2 -10  -2   29.80    1.80
   2 -10   2   29.60    1.30
  -2  10   2   31.70    3.40
   2  10  -2   26.20    2.00
  -2  10  -2   33.50    2.20
   2  10   2   29.80    1.70
   2 -10  -2   30.70    1.80
   2 -10  -2   30.40    1.60
   2  10   2   30.30    2.20
  -2  10  -2   29.60    1.60
  -2 -10   2   26.60    2.00
  -2  10  -2   33.90    1.80
  -2  10  -2   29.90    2.50
  -3  10   2   92.69    3.90
  -3 -10  -2   88.19    3.20
  -3 -10  -2   89.79    3.10
  -3 -10  -2   89.39    3.30
  -3  10   2   87.19    2.90
  -3  10   2   90.69    3.90
   3 -10   2   96.49    3.00
   3  10  -2   90.69    3.60
   3 -10   2   87.09    2.30
  -3  10   2   92.19    3.20
   3  10  -2   86.39    2.70
  -3 -10   2   89.89    3.60
   3 -10  -2   84.59    3.20
  -3  10  -2   89.29    3.60
   3 -10  -2   84.59    2.70
   3  10   2   91.59    3.80
  -3  10  -2   88.09    3.80
  -3  10  -2   91.99    3.00
   3  10   2   89.49    3.00
   4  10  -2  138.99    4.60
   4  10  -2  133.59    3.70
   4 -10   2  130.49    3.10
  -4  10   2  133.29    4.90
   4 -10   2  137.39    3.60
  -4  10   2  136.59    5.00
  -4  10   2  129.79    4.20
  -4 -10  -2  136.19    4.00
  -4 -10  -2  136.79    4.20
  -4  10  -2  131.99    4.60
   4 -10  -2  141.39    3.70
  -4 -10   2  138.69    4.50
   4 -10  -2  144.69    6.10
  -4  10  -2  135.99    3.90
   4  10   2  132.39    3.90
   4  10   2  129.99    4.80
  -4  10  -2  140.19    5.10
  -5  10   2   20.50    1.60
   5 -10   2   19.70    1.40
   5  10  -2   20.60    1.40
  -5  10   2   22.40    2.10
   5 -10   2   21.80    1.10
  -5  10   2   21.70    2.00
   5  10  -2   20.40    1.80
  -5 -10  -2   22.60    1.70
  -5 -10   2   20.80    1.80
   5 -10  -2   20.40    1.70
   5 -10  -2   21.60    1.40
  -5  10  -2   24.90    2.20
   5  10   2   22.30    2.30
  -5  10  -2   21.30    2.00
  -5  10  -2   24.50    1.60
   6 -10   2   59.99    2.40
   6 -10   2   61.19    2.00
  -6  10   2   58.19    3.30
  -6 -10  -2   56.99    2.80
  -6  10   2   59.29    3.40
  -6 -10  -2   59.49    2.80
   6  10  -2   60.59    2.90
  -6  10   2   58.69    2.90
  -6  10  -2   57.49    2.60
  -6  10  -2   60.09    3.20
  -6  10  -2   57.49    3.40
   6  10   2   56.49    3.10
  -6 -10   2   59.49    2.20
  -6 -10   2   53.99    2.80
   6 -10  -2   61.49    2.40
   7  10  -2   17.20    1.80
  -7  10   2   21.20    2.20
  -7 -10  -2   21.90    1.80
   7 -10   2   19.00    1.20
  -7  10   2   19.10    2.10
  -7 -10  -2   22.00    2.40
  -7  10   2   18.90    1.70
  -7 -10   2   21.00    1.90
   7 -10  -2   21.10    1.50
   7  10   2   21.80    2.00
  -7 -10   2   21.60    1.50
  -7 -10   2   23.80    1.40
  -7  10  -2   20.90    2.10
  -7  10  -2   22.40    2.30
  -8  10   2    2.40    0.90
   8 -10   2    2.40    0.60
  -8  10   2    6.60    1.60
   8 -10   2    2.30    0.80
  -8 -10  -2    2.00    1.00
  -8  10   2    2.30    1.10
  -8 -10   2    3.80    0.80
  -8  10  -2    1.60    0.90
  -8  10  -2    1.70    1.00
  -8  10  -2    2.70    0.80
   8 -10  -2    3.30    0.90
  -8 -10   2    3.30    0.70
  -9  10   2   66.59    3.40
   9 -10   2   64.39    2.50
  -9  10   2   76.29    4.10
  -9 -10  -2   70.79    3.30
  -9  10   2   71.99    4.00
  -9 -10   2   65.99    2.60
   9 -10  -2   67.39    2.80
  -9  10  -2   68.19    4.00
  -9  10  -2   60.09    3.00
  -9 -10   2   60.19    2.60
   0  11   2   10.50    1.10
   0 -11  -2   12.50    1.20
   0  11  -2   12.20    1.80
   0  11   2    9.00    1.50
   0  11  -2   11.10    1.00
   0 -11  -2   13.70    1.20
   1  11  -2   48.90    1.90
  -1  11   2   51.29    3.00
  -1 -11  -2   51.49    2.40
  -1 -11  -2   52.39    2.40
   1 -11   2   50.39    1.90
   1  11  -2   49.00    2.80
  -1  11   2   48.70    2.30
  -1  11   2   51.79    2.20
   1 -11  -2   48.20    2.30
  -1  11  -2   53.29    3.00
  -1  11  -2   46.30    1.80
   1  11   2   50.69    2.90
   1 -11  -2   49.30    2.10
  -1  11  -2   49.40    2.80
  -2 -11  -2    2.10    0.60
   2  11  -2   -0.20    0.50
  -2  11   2    1.80    0.90
  -2 -11  -2    0.70    0.60
   2  11  -2    1.90    0.50
  -2 -11  -2    1.20    0.70
  -2  11   2    1.00    0.50
   2 -11   2    0.50    0.30
  -2  11   2    0.90    0.50
  -2  11   2    1.10    0.80
   2  11   2    1.00    0.70
  -2  11  -2    0.40    0.70
   2 -11  -2    0.40    0.50
  -2  11  -2    1.10    0.40
   2  11   2    0.60    0.50
  -2  11  -2    0.50    0.60
  -2  11  -2    2.30    0.70
   2 -11  -2    1.10    0.50
  -3  11   2  117.59    4.70
  -3  11   2  111.29    3.70
  -3 -11  -2  112.39    3.60
   3 -11   2  115.49    3.50
  -3 -11  -2  115.49    3.70
   3  11  -2  110.69    4.40
  -3  11   2  101.39    3.40
  -3  11   2  109.89    4.60
   3  11  -2  108.19    3.20
   3  11   2  104.39    4.30
  -3  11  -2  108.89    4.50
   3 -11  -2  111.99    3.20
  -3  11  -2  109.49    3.50
   3 -11  -2  114.69    4.50
   3  11   2  106.49    3.50
   4  11  -2   12.30    1.70
  -4  11   2   16.70    2.20
  -4 -11  -2   15.70    1.40
  -4 -11  -2   16.50    1.50
  -4  11   2   14.80    2.00
  -4  11   2   15.60    1.50
   4 -11   2   15.60    1.10
   4  11  -2   15.80    1.30
   4 -11   2   13.90    0.90
   4  11   2   16.80    1.90
   4 -11  -2   17.40    1.20
  -4  11  -2   13.30    2.00
   4 -11  -2   15.90    1.50
  -4  11  -2   13.90    1.30
  -4  11  -2   14.70    2.00
  -5  11   2    0.20    0.90
  -5 -11  -2    0.20    0.70
   5 -11   2    0.90    0.60
  -5  11   2    1.40    0.90
   5 -11   2    1.20    0.50
  -5 -11  -2    1.70    0.70
   5  11  -2    0.10    0.70
  -5  11  -2    1.20    0.90
   5  11   2    1.60    0.80
   5 -11  -2    2.20    0.70
   5 -11  -2    0.50    0.50
  -5  11  -2    2.50    0.90
  -6 -11  -2   31.50    2.10
   6  11  -2   33.10    2.30
  -6  11   2   32.40    2.60
  -6 -11  -2   34.90    2.10
  -6  11   2   33.90    2.30
   6 -11   2   32.50    1.40
  -6  11   2   30.40    2.50
   6 -11   2   30.10    1.70
  -6  11  -2   34.80    2.60
   6 -11  -2   32.50    1.80
  -6  11  -2   30.10    2.00
   6  11   2   35.20    2.60
  -6  11  -2   34.20    2.80
  -7  11   2   68.39    3.30
  -7  11   2   71.59    3.90
  -7  11   2   68.89    3.80
   7  11  -2   66.89    3.30
  -7 -11  -2   65.59    3.00
   7 -11   2   65.69    2.20
   7 -11  -2   71.09    2.70
   7  11   2   61.79    3.50
  -7  11  -2   65.59    3.00
  -7  11  -2   67.59    3.90
  -7  11  -2   70.69    3.80
   8  11  -2   15.50    1.70
  -8  11   2   15.70    2.20
  -8 -11  -2   19.40    1.80
   8 -11   2   17.90    1.20
   8 -11   2   13.80    1.60
  -8  11   2   11.90    1.70
  -8  11  -2   15.80    1.60
  -8  11  -2   14.70    2.20
  -8  11  -2   17.90    2.40
   8 -11  -2   16.30    1.40
   0  12   2    9.00    1.70
   0 -12  -2   14.30    1.30
   0  12  -2   12.30    1.00
   0 -12  -2   13.80    1.40
   0  12   2   12.70    1.30
   0  12  -2   11.20    1.80
   1  12  -2   37.00    1.70
  -1 -12  -2   38.40    2.10
  -1  12   2   39.30    2.20
  -1  12   2   39.80    2.70
  -1  12   2   37.10    2.00
   1  12  -2   38.40    2.60
  -1 -12  -2   39.60    2.10
   1 -12  -2   44.50    2.10
   1 -12  -2   38.60    2.20
  -1  12  -2   38.20    1.70
  -1  12  -2   38.70    2.70
  -1  12  -2   35.00    2.60
  -1  12  -2   38.60    2.10
   1  12   2   39.10    2.80
   1  12   2   35.40    1.90
  -2  12   2    6.40    1.00
  -2  12   2    7.00    1.40
  -2  12   2    6.10    1.10
   2  12  -2    6.60    1.40
  -2 -12  -2    6.80    1.10
   2  12  -2    8.10    1.00
   2 -12   2    7.60    0.90
  -2 -12  -2    8.00    1.20
  -2  12   2    7.00    1.50
  -2 -12  -2    9.20    1.30
  -2  12  -2    4.70    1.20
  -2  12  -2    7.20    1.10
   2 -12  -2    8.00    1.10
  -2  12  -2    6.80    0.80
  -2  12  -2    9.70    1.70
   2 -12  -2    9.00    1.30
   2  12   2    7.00    1.50
  -3  12   2   85.39    3.20
  -3  12   2   95.09    3.60
  -3 -12  -2   94.49    3.30
  -3  12   2   95.49    4.40
  -3 -12  -2   93.89    4.10
   3  12  -2   90.39    4.00
   3  12  -2   94.49    3.10
   3 -12   2   94.59    2.60
  -3  12   2   97.49    4.40
   3 -12  -2   91.69    3.00
   3 -12  -2   87.69    3.40
  -3  12  -2   96.29    4.40
   3  12   2   92.59    4.20
  -3  12  -2  100.69    4.30
  -3  12  -2   91.49    3.30
  -4 -12  -2   86.19    3.20
  -4  12   2   87.59    3.50
  -4  12   2   83.39    4.20
   4 -12   2   82.79    2.40
  -4 -12  -2   82.29    3.20
   4  12  -2   82.49    3.80
  -4  12   2   82.69    4.20
  -4  12  -2   79.09    3.80
   4  12   2   84.99    4.00
   4 -12  -2   86.69    2.90
  -4  12  -2   78.69    3.20
  -4  12  -2   79.79    4.10
   4 -12  -2   77.49    3.20
  -5  12   2   64.79    3.70
  -5  12   2   61.99    3.70
  -5 -12  -2   63.59    2.80
   5 -12   2   64.39    2.10
  -5  12   2   72.49    3.30
   5  12  -2   65.89    3.40
  -5 -12  -2   63.49    2.70
  -5  12  -2   66.99    3.60
  -5  12  -2   67.29    3.90
   5  12   2   65.49    3.60
  -5  12  -2   67.69    3.00
   5 -12  -2   67.19    2.50
   6 -12   2    4.00    0.70
  -6 -12  -2    3.90    0.90
  -6 -12  -2    2.60    1.10
  -6  12   2    1.50    1.20
  -6  12   2    4.10    1.00
   6  12  -2    5.50    1.10
  -6  12   2    5.40    1.60
   6  12   2    2.30    0.90
  -6  12  -2    5.10    1.00
   6 -12  -2    3.90    0.80
  -6  12  -2    5.80    1.60
  -6  12  -2   10.30    2.90
  -7 -12  -2   20.60    2.00
   7  12  -2   20.20    2.00
  -7  12   2   19.40    1.90
   7 -12   2   21.00    1.20
  -7  12   2   23.20    2.80
  -7  12   2   21.50    2.70
   7 -12  -2   22.50    1.60
  -7  12  -2   18.90    2.50
  -7  12  -2   26.90    4.60
  -7  12  -2   17.40    1.70
   7  12   2   19.00    2.10
   0  13   2   48.00    2.50
   0  13  -2   51.49    3.20
   0  13   2   50.09    3.20
   0 -13  -2   50.89    2.40
   0  13  -2   42.60    1.90
  -1  13   2   44.30    3.20
   1  13  -2   51.09    2.10
  -1  13   2   46.40    2.30
  -1  13   2   48.40    2.60
   1  13  -2   56.49    3.30
  -1 -13  -2   48.80    2.30
   1 -13  -2   49.90    2.40
  -1  13  -2   49.90    2.00
  -1  13  -2   53.69    2.50
   1 -13  -2   53.69    2.60
   1  13   2   60.49    3.50
  -1  13  -2   57.19    3.40
  -2  13   2   39.20    2.30
  -2  13   2   31.20    1.90
   2  13  -2   40.90    2.80
  -2  13   2   41.70    3.00
  -2 -13  -2   36.60    2.00
   2  13  -2   36.30    1.90
   2  13   2   41.10    2.90
   2 -13  -2   38.10    2.10
   2 -13  -2   41.60    2.10
  -2  13  -2   38.00    2.20
  -2  13  -2   40.90    2.90
  -2  13  -2   35.20    2.80
   3  13  -2   19.60    2.10
   3  13  -2   18.70    1.70
  -3  13   2   18.50    1.70
  -3 -13  -2   20.10    1.60
  -3 -13  -2   17.40    2.40
  -3  13   2   16.50    2.20
   3 -13   2   20.00    1.20
  -3  13   2   15.80    2.30
   3 -13  -2   18.10    1.60
   3 -13  -2   16.80    1.40
  -3  13  -2   14.20    2.10
  -3  13  -2   22.10    1.70
   3  13   2   23.30    2.20
  -3  13  -2   20.70    2.10
  -4 -13  -2    3.20    0.90
   4  13  -2    3.40    1.10
  -4 -13  -2    2.40    0.80
  -4  13   2    2.90    1.30
  -4  13   2    3.00    1.20
   4 -13   2    2.30    0.60
  -4  13   2    2.20    0.90
  -4  13  -2    2.20    1.10
   4 -13  -2    3.60    0.80
  -4  13  -2    1.80    1.10
   4  13   2    1.50    0.90
  -4  13  -2    2.20    0.70
  -5  13   2   78.89    3.50
   5 -13   2   70.29    2.20
  -5 -13  -2   66.89    2.80
  -5  13   2   73.49    4.20
  -5 -13  -2   69.99    4.10
   5  13  -2   62.59    3.50
  -5  13   2   69.69    4.10
  -5  13  -2   73.79    4.20
  -5  13  -2   70.39    3.80
   5 -13  -2   68.99    2.70
   5  13   2   69.19    3.80
  -5  13  -2   69.89    3.20
   0  14  -2   39.20    3.00
   0 -14  -2   42.60    2.10
   0  14   2   39.40    3.00
   0  14  -2   39.50    2.30
   0 -14  -2   37.10    2.20
  -1  14   2   30.60    2.70
  -1 -14  -2   33.80    1.90
  -1  14   2   36.10    3.50
   1 -14  -2   31.40    1.90
   1  14   2   32.10    2.80
  -1  14  -2   31.20    2.10
  -1  14  -2   31.70    2.80
   0   0  -3    0.10    0.10
   0   0  -3    0.20    0.10
   0   0   3    0.20    0.10
   1   0   3 1553.94   48.00
  -1   0  -3 1578.04   47.10
  -1   0   3 1639.24   46.40
   1   0  -3 1617.24   44.60
  -2   0  -3 1585.44   23.50
  -2   0   3 1542.25   23.50
   2   0  -3 1598.34   23.50
   3   0   3   87.79    2.00
  -3   0  -3   85.39    2.00
   3   0  -3   82.49    2.10
   3   0  -3   86.39    2.20
  -3   0  -3   82.89    2.20
  -3   0   3   85.49    1.70
  -3   0   3   81.89    2.10
  -3   0   3   85.99    2.20
   3   0   3   83.09    2.00
   4   0  -3   78.39    2.30
   4   0   3   75.29    2.20
  -4   0   3   78.29    2.30
   4   0  -3   76.69    2.20
  -4   0  -3   78.19    2.10
  -4   0   3   78.19    1.80
   4   0   3   80.39    2.10
  -4   0   3   75.59    2.30
  -5   0   3   11.70    1.00
   5   0   3   13.20    1.00
  -5   0  -3   10.10    0.80
  -5   0   3   11.80    0.70
   5   0  -3   12.30    1.00
   5   0   3   12.60    0.90
  -6   0   3  135.09    3.70
  -6   0  -3  148.89    3.60
   6   0  -3  137.29    3.70
  -6   0  -3  137.89    3.80
   6   0   3  132.79    3.60
  -6   0   3  135.99    3.10
   6   0   3  141.69    3.50
   6   0  -3  138.59    3.80
  -7   0  -3   22.90    1.60
   7   0  -3   23.70    1.50
  -7   0  -3   23.40    1.40
  -7   0   3   20.50    1.20
  -7   0   3   22.80    1.50
   7   0   3   21.30    1.30
   7   0  -3   21.10    1.40
   7   0   3   23.00    1.50
  -8   0  -3  192.28    4.90
  -8   0  -3  191.58    5.30
  -8   0   3  194.38    4.50
   8   0  -3  190.88    5.20
   8   0   3  190.08    5.10
  -8   0   3  186.98    5.10
   8   0   3  196.28    4.90
  -8   0   3  193.98    5.20
   9   0  -3  245.28    6.40
  -9   0   3  248.68    6.50
  -9   0   3  246.58    5.70
   9   0   3  260.57    6.10
  -9   0  -3  253.27    6.60
  -9   0  -3  258.07    6.20
  -9   0   3  247.18    6.40
   9   0  -3  251.97    6.20
   9   0   3  241.68    6.30
  10   0   3  123.09    4.00
 -10   0   3  123.19    3.60
 -10   0   3  123.09    4.40
 -10   0   3  117.89    4.40
 -10   0  -3  122.89    4.10
 -10   0  -3  111.99    4.40
 -11   0  -3   39.20    2.40
 -11   0  -3   39.80    2.60
 -11   0   3   40.90    2.70
 -11   0   3   45.00    2.20
 -11   0   3   45.50    2.70
 -12   0   3    8.70    1.20
 -12   0   3    9.20    1.20
 -12   0   3    7.80    1.50
 -12   0  -3   11.90    1.80
 -12   0  -3   11.70    1.60
 -12   0   3   10.60    1.60
 -13   0  -3   14.10    1.90
 -13   0   3   15.40    2.30
 -13   0   3   16.80    2.20
 -13   0   3   21.90    3.50
 -13   0   3   12.80    1.40
   0   1   3  782.22   12.00
   0   1  -3  787.52   11.50
  -1  -1  -3 4610.34  101.39
   1  -1   3 4343.97   90.89
   1   1  -3 4263.17   84.19
  -1   1  -3 4543.85   92.39
   1   1   3 4640.74  103.99
   1  -1  -3 4543.55   98.59
  -1  -1   3 4340.27   86.59
  -2  -1  -3 1272.07   19.40
  -2  -1  -3 1254.47   19.10
   2   1  -3 1295.57   19.00
   2   1  -3 1263.17   19.10
  -2   1   3 1243.18   19.20
  -2  -1   3 1264.07   19.00
  -2   1  -3 1298.97   19.20
   2  -1  -3 1301.87   19.10
   2   1   3 1273.77   19.20
   2  -1  -3 1260.07   19.50
   3  -1   3  436.86    7.10
   3   1  -3  443.26    7.40
   3  -1   3  444.16    7.40
  -3   1   3  443.46    7.20
   3   1  -3  439.86    7.60
  -3   1   3  434.56    7.60
  -3   1  -3  429.86    7.00
   3   1   3  429.96    7.20
  -3   1  -3  434.16    7.40
   3  -1  -3  422.86    7.30
  -3  -1   3  417.26    7.40
   3  -1  -3  444.36    7.10
   3  -1  -3  433.66    7.50
   3   1   3  424.56    7.30
  -3  -1   3  437.56    7.20
   4   1  -3  642.84   10.70
  -4   1   3  634.54   10.80
  -4   1   3  637.64   10.90
   4  -1   3  652.23   10.30
   4  -1   3  649.74   10.70
   4   1  -3  632.24   10.80
  -4   1   3  651.23   10.30
   4  -1  -3  643.04   10.70
  -4  -1   3  656.23    9.90
   4  -1  -3  664.73   11.00
  -4   1  -3  624.44   10.80
  -4   1  -3  647.34   10.40
   4   1   3  639.64   10.70
  -4  -1   3  660.63   10.70
   4   1   3  638.64   10.70
  -5  -1  -3  630.54   11.30
  -5  -1  -3  672.83   11.00
  -5   1   3  659.73   10.60
  -5   1   3  605.74   11.00
  -5   1   3  641.84   11.30
   5   1  -3  629.04   11.10
   5  -1   3  646.04   10.60
   5   1   3  633.24   10.80
   5  -1  -3  647.24   11.20
  -5   1  -3  646.74   10.60
  -5  -1   3  627.44   11.10
   5  -1  -3  623.54   10.80
  -5  -1   3  623.34   10.90
   5   1   3  639.44   10.90
   6   1  -3   46.90    2.00
   6  -1   3   50.19    2.00
   6  -1   3   47.10    1.80
  -6  -1  -3   48.20    1.90
  -6   1   3   47.60    1.70
  -6  -1  -3   45.70    2.10
  -6   1   3   47.30    2.10
   6   1  -3   47.00    2.00
  -6  -1   3   49.00    2.00
   6   1   3   48.90    2.00
  -6   1  -3   47.60    2.10
   6   1   3   48.80    1.90
  -6   1  -3   48.00    2.10
   6  -1  -3   49.10    2.10
   6   1   3   47.10    2.00
   6  -1  -3   48.70    1.90
  -6  -1   3   46.10    2.00
   7  -1   3  540.95   10.20
   7   1  -3  535.65   10.30
  -7  -1  -3  555.24   10.60
  -7   1   3  525.55   10.40
   7   1  -3  533.55   10.20
   7  -1   3  559.84    9.80
  -7  -1  -3  545.05   10.10
  -7   1   3  531.65    9.60
  -7   1   3  539.75   10.40
  -7  -1   3  533.25   10.20
  -7   1  -3  547.05    9.90
  -7   1  -3  527.45   10.40
   7   1   3  549.65   10.10
   7  -1  -3  522.65   10.00
   7  -1  -3  519.85   10.30
   7   1   3  527.35   10.10
   7   1   3  553.64   10.00
  -7  -1   3  535.05   10.30
   8  -1   3   49.50    2.30
  -8   1   3   51.59    2.40
  -8   1   3   49.30    2.50
  -8  -1  -3   51.49    2.30
   8   1  -3   51.39    2.40
   8  -1   3   48.30    2.10
  -8  -1  -3   47.50    2.40
  -8   1   3   49.30    2.00
   8   1  -3   49.50    2.30
  -8   1  -3   50.29    2.20
  -8  -1   3   50.69    2.40
   8   1   3   52.99    2.30
  -8  -1   3   49.99    1.80
   8   1   3   47.80    2.30
  -8   1  -3   53.19    2.60
   8  -1  -3   47.00    2.20
   8   1   3   52.69    2.40
  -8  -1   3   49.90    2.40
   8  -1  -3   50.09    2.40
  -9   1   3   93.99    3.70
  -9  -1  -3   97.29    3.80
  -9   1   3  101.19    3.70
   9   1  -3   95.39    3.60
  -9   1   3  106.29    3.20
   9  -1   3   99.09    3.60
   9  -1   3   96.99    3.30
  -9  -1  -3   95.39    3.50
  -9  -1   3  101.39    3.00
  -9  -1   3  100.99    3.70
  -9  -1   3   96.39    3.00
   9  -1  -3   99.99    3.50
   9   1   3   91.89    3.50
   9  -1  -3   92.29    3.60
   9   1   3   96.49    4.00
  -9   1  -3  101.09    3.80
  -9   1  -3   97.79    3.40
   9   1   3   96.79    3.50
  -9  -1   3   90.99    3.60
 -10  -1  -3  128.29    4.20
 -10   1   3  118.19    5.20
 -10   1   3  126.89    4.40
  10  -1   3  119.29    3.90
 -10  -1  -3  115.79    4.10
 -10  -1  -3  121.39    4.50
 -10   1   3  123.59    3.70
 -10  -1   3  119.49    3.50
  10   1   3  118.79    4.10
 -10   1  -3  116.29    4.40
 -10  -1   3  117.69    4.30
 -10   1  -3  118.59    4.00
 -10  -1   3  116.39    3.30
 -10  -1   3  116.09    4.30
 -11   1   3   45.80    2.30
 -11   1   3   46.00    2.70
 -11   1   3   43.40    2.70
 -11  -1  -3   50.09    3.00
 -11  -1  -3   41.70    2.40
 -11   1  -3   42.80    2.70
 -11   1  -3   43.00    2.50
 -11  -1   3   42.40    2.70
 -11  -1   3   40.70    2.00
 -11  -1   3   42.90    2.70
 -11  -1   3   42.20    2.00
 -12  -1  -3   14.20    2.00
 -12   1   3   14.90    1.40
 -12   1   3   17.10    2.00
 -12   1   3   14.90    2.00
 -12  -1   3   12.40    1.90
 -12  -1   3   13.60    2.00
 -12  -1   3   15.10    1.30
 -12   1  -3   13.60    2.00
 -12  -1   3   14.00    1.30
 -12   1  -3   15.40    1.90
 -12   1  -3   14.50    1.80
 -13   1   3   14.70    2.10
 -13  -1  -3   11.20    2.40
 -13   1   3   13.70    2.20
 -13   1   3   15.40    1.60
 -13   1  -3   14.00    1.90
 -13   1  -3   17.10    1.90
 -13  -1   3   13.60    2.10
 -13  -1   3   13.00    2.50
 -13   1  -3   13.70    2.40
 -13  -1   3   16.10    1.60
 -13  -1   3   13.70    1.30
   0  -2  -3   14.60    0.60
   0  -2  -3   15.40    0.80
   0   2   3   15.60    0.70
   0   2  -3   15.60    0.70
   0  -2   3   16.60    0.80
   0   2   3   15.40    0.80
  -1   2   3  938.41   14.60
   1   2  -3  969.60   14.40
   1   2  -3  935.41   14.40
  -1   2   3  966.10   14.50
  -1   2   3  947.01   14.80
  -1   2   3  946.71   14.60
  -1  -2  -3  964.50   14.80
  -1   2  -3  974.70   14.10
  -1  -2   3  982.00   14.60
  -1   2  -3  993.30   14.30
   1  -2  -3  940.61   14.80
   1   2   3  948.41   14.70
   1  -2  -3  979.40   14.80
  -1   2  -3  952.40   15.00
   1   2   3  979.20   15.00
   1  -2  -3  943.11   15.00
  -2  -2  -3  134.29    2.90
   2   2  -3  146.29    2.50
   2  -2   3  142.09    2.60
   2   2  -3  142.39    2.90
   2  -2   3  136.09    2.40
  -2   2   3  132.69    3.10
  -2  -2  -3  138.69    3.10
  -2   2   3  137.59    3.00
  -2   2   3  139.79    2.90
  -2   2   3  133.69    2.90
   2   2  -3  142.29    2.60
   2   2   3  134.89    2.80
   2  -2  -3  137.69    2.90
   2  -2  -3  138.79    2.80
   2  -2  -3  139.49    2.90
  -2  -2   3  140.09    2.40
  -2  -2   3  132.99    2.90
  -2   2  -3  137.49    2.40
  -2  -2   3  143.49    2.50
  -2   2  -3  142.59    2.70
   2   2   3  138.89    3.10
  -3  -2  -3   23.90    1.20
   3   2  -3   23.80    0.70
   3  -2   3   24.30    1.00
  -3  -2  -3   21.10    1.10
   3  -2   3   22.50    0.80
  -3   2   3   24.70    1.20
   3   2  -3   24.60    1.10
  -3   2   3   24.00    1.10
   3   2  -3   24.50    1.00
  -3   2   3   22.70    1.00
  -3  -2   3   25.20    1.10
   3  -2  -3   23.40    1.00
  -3   2  -3   25.60    1.10
   3  -2  -3   27.00    1.20
   3  -2  -3   23.60    1.00
  -3  -2   3   25.10    1.00
   3   2   3   21.20    1.00
  -3  -2   3   25.60    0.70
  -3   2  -3   23.20    0.90
   4  -2   3  115.89    2.50
   4   2  -3  113.99    2.90
  -4   2   3  118.69    3.00
   4  -2   3  120.89    2.90
  -4   2   3  116.89    3.20
  -4  -2  -3  114.59    3.00
  -4   2   3  120.99    2.90
  -4   2  -3  116.89    2.60
  -4  -2   3  117.59    3.00
   4   2   3  116.19    3.00
   4  -2  -3  114.29    2.80
   4   2   3  114.59    2.90
  -4  -2   3  117.99    2.30
  -4   2  -3  119.19    3.00
   4  -2  -3  118.19    2.90
  -4  -2   3  117.19    2.80
   5   2  -3   75.39    2.80
   5  -2   3   74.99    2.80
  -5   2   3   75.49    2.60
  -5   2   3   76.09    2.50
  -5  -2  -3   82.59    3.00
  -5   2   3   79.89    2.30
   5  -2   3   79.39    2.10
  -5  -2  -3   79.99    2.60
  -5   2  -3   80.69    2.30
   5   2   3   81.59    2.90
   5  -2  -3   80.79    2.70
  -5  -2   3   81.59    1.90
   5  -2  -3   79.29    2.40
  -5  -2   3   78.99    2.60
  -5  -2   3   79.79    2.40
   5   2   3   85.99    2.60
  -5   2  -3   81.19    3.00
   6   2  -3  128.59    3.70
  -6  -2  -3  128.79    3.70
  -6   2   3  130.89    3.40
   6   2  -3  127.89    3.60
   6  -2   3  132.89    3.60
   6  -2   3  132.59    3.20
  -6   2   3  127.19    3.80
  -6  -2  -3  129.79    3.60
  -6   2  -3  121.19    3.60
   6  -2  -3  119.59    3.30
  -6   2  -3  126.89    3.20
   6  -2  -3  122.79    3.70
  -6  -2   3  122.89    2.80
  -6  -2   3  119.49    3.40
  -6  -2   3  125.29    3.60
   6   2   3  126.59    3.50
   6   2   3  125.99    3.50
   7  -2   3  188.58    4.70
  -7   2   3  187.08    4.50
   7  -2   3  191.88    4.40
  -7  -2  -3  190.98    4.80
  -7   2   3  190.18    4.90
  -7  -2  -3  183.78    5.00
   7   2  -3  184.78    4.90
   7   2  -3  186.78    4.80
  -7   2   3  194.18    5.10
  -7   2  -3  195.18    5.10
  -7  -2   3  189.38    4.80
  -7   2  -3  196.08    4.60
   7  -2  -3  179.68    4.60
   7   2   3  193.88    4.80
  -7  -2   3  194.88    4.00
  -7  -2   3  187.28    5.00
   7   2   3  180.58    4.70
   7  -2  -3  189.78    5.00
  -8   2   3   72.39    2.60
  -8   2   3   69.99    3.00
  -8  -2  -3   71.39    3.00
   8  -2   3   67.09    2.80
   8   2  -3   70.89    2.90
   8  -2   3   74.99    2.60
  -8   2   3   75.89    3.00
  -8  -2  -3   73.29    2.80
   8  -2  -3   73.09    2.70
  -8  -2   3   69.29    2.90
   8   2   3   72.49    3.30
  -8   2  -3   65.29    2.50
  -8   2  -3   67.89    3.00
  -8  -2   3   71.59    2.20
  -8  -2   3   71.59    2.80
   8  -2  -3   69.59    4.40
   8   2   3   72.59    2.80
  -9  -2  -3  176.38    5.30
  -9   2   3  173.68    5.30
   9   2  -3  170.88    5.10
   9  -2   3  179.18    4.60
   9  -2   3  173.78    5.00
  -9   2   3  174.18    5.10
  -9   2   3  172.38    4.60
  -9  -2  -3  169.28    4.90
  -9  -2   3  185.68    5.30
  -9   2  -3  185.28    5.40
   9   2   3  172.68    5.00
   9  -2  -3  173.28    5.20
   9   2   3  170.18    5.00
   9  -2  -3  186.48    5.00
  -9   2  -3  174.58    4.80
  -9  -2   3  173.18    5.00
  -9  -2   3  181.48    5.20
  -9   2  -3  170.88    5.30
 -10   2   3  278.87    6.50
  10  -2   3  283.67    6.60
 -10  -2  -3  265.07    6.90
 -10   2   3  287.37    7.50
 -10  -2  -3  275.57    7.40
 -10   2   3  280.37    7.20
 -10   2  -3  265.07    7.30
 -10  -2   3  268.67    5.70
 -10  -2   3  274.87    7.20
 -10  -2   3  273.97    7.00
 -10   2  -3  271.47    6.70
 -10   2  -3  270.27    7.20
 -11   2   3    9.50    1.60
 -11  -2  -3    6.90    1.40
 -11   2   3    6.10    1.00
 -11   2   3    8.50    1.50
 -11  -2  -3    7.20    1.30
 -11  -2   3    7.80    1.00
 -11   2  -3    8.20    1.40
 -11  -2   3    7.20    1.00
 -11  -2   3    6.10    1.30
 -11  -2   3    7.00    1.40
 -11   2  -3    5.70    1.10
 -12  -2  -3   19.60    2.40
 -12   2   3   16.30    2.00
 -12   2   3   15.30    1.50
 -12   2   3   17.50    2.30
 -12  -2   3   17.20    2.20
 -12   2  -3   14.60    2.00
 -12   2  -3   13.70    2.00
 -12  -2   3   14.60    1.40
 -12  -2   3   17.00    2.10
 -12   2  -3   16.10    1.70
 -12  -2   3   12.80    1.30
 -13   2   3    9.60    2.00
 -13  -2  -3   12.30    2.60
 -13   2   3   13.70    2.20
 -13   2   3   13.40    1.70
 -13  -2   3   11.40    1.80
 -13  -2   3    9.90    1.30
 -13   2  -3   16.40    2.10
 -13   2  -3    9.90    1.70
 -13   2  -3   12.60    1.80
 -13  -2   3   12.10    1.90
 -13  -2   3   12.30    1.30
   0   3  -3  129.49    2.80
   0  -3   3  125.39    2.80
   0  -3  -3  118.99    2.60
   0  -3  -3  119.89    2.80
   0   3   3  118.39    2.60
   0   3  -3  123.89    2.00
   0   3   3  123.79    2.90
   0  -3  -3  129.09    2.90
  -1   3   3  170.98    3.60
  -1   3   3  179.08    3.40
   1   3  -3  173.48    3.40
  -1   3   3  167.88    3.30
  -1   3   3  168.88    3.70
   1  -3   3  167.18    3.70
   1   3  -3  174.88    3.40
  -1  -3  -3  175.08    3.40
  -1   3  -3  168.68    3.70
   1   3   3  172.88    3.60
   1   3   3  168.88    3.30
   1  -3  -3  169.38    3.30
  -1  -3   3  164.18    3.30
   1  -3  -3  164.58    3.60
  -1   3  -3  172.78    3.00
   1  -3  -3  165.78    3.60
  -2   3   3  122.99    2.70
   2  -3   3  123.79    2.20
   2   3  -3  126.19    2.50
  -2  -3  -3  122.29    2.80
   2  -3   3  127.19    2.40
  -2   3   3  127.49    3.10
  -2   3   3  129.09    3.00
   2   3  -3  123.79    2.90
   2   3  -3  128.09    2.60
  -2  -3  -3  127.19    3.00
  -2   3   3  120.29    2.80
   2   3   3  119.89    2.70
   2  -3  -3  125.69    2.80
  -2  -3   3  121.99    2.60
   2   3   3  117.79    3.00
  -2   3  -3  122.59    2.60
   2  -3  -3  122.79    2.60
  -2   3  -3  120.19    3.10
   2  -3  -3  117.69    2.90
  -2   3  -3  119.49    2.30
   2  -3  -3  124.99    3.00
   3  -3   3   51.19    1.30
  -3   3   3   50.89    1.80
   3   3  -3   49.99    1.40
  -3   3   3   49.00    1.70
   3   3  -3   48.60    1.70
   3  -3   3   53.29    1.50
  -3   3   3   45.20    1.80
  -3  -3  -3   47.80    1.80
   3   3  -3   49.80    1.60
  -3  -3  -3   52.09    1.80
  -3  -3   3   52.59    1.40
   3  -3  -3   51.79    1.90
   3   3   3   52.79    1.70
  -3  -3   3   49.60    1.40
   3  -3  -3   52.99    1.80
  -3   3  -3   50.49    2.00
   3  -3  -3   53.19    1.60
  -3   3  -3   50.59    1.70
  -3   3  -3   51.69    1.40
   3  -3  -3   52.19    1.70
   3   3   3   52.59    1.90
   4  -3   3  275.47    5.30
  -4  -3  -3  272.67    5.60
   4   3  -3  276.07    4.90
   4   3  -3  277.37    5.40
  -4  -3  -3  266.77    5.60
  -4   3   3  282.97    5.60
   4  -3   3  267.87    4.80
   4   3   3  279.37    5.70
   4  -3  -3  268.97    5.50
  -4  -3   3  271.27    5.10
  -4   3  -3  275.47    5.50
   4   3   3  264.17    5.40
  -4   3  -3  271.27    5.90
   4  -3  -3  266.97    5.70
  -4   3  -3  274.07    5.00
   4  -3  -3  264.97    5.40
  -4  -3   3  282.57    4.80
  -5   3   3   72.69    2.40
  -5  -3  -3   75.69    2.50
  -5   3   3   68.49    2.30
  -5   3   3   68.39    2.60
   5  -3   3   71.49    1.90
  -5  -3  -3   69.59    2.50
   5   3  -3   69.19    2.30
   5   3  -3   71.19    2.50
   5  -3  -3   74.79    2.60
   5  -3  -3   72.49    2.30
  -5  -3   3   74.89    1.90
   5   3   3   74.19    2.40
  -5  -3   3   68.69    2.50
  -5   3  -3   71.09    2.10
  -5   3  -3   71.89    2.50
  -5  -3   3   73.49    2.30
   5  -3  -3   69.69    2.40
   5   3   3   74.39    2.50
  -5   3  -3   72.69    2.70
   6  -3   3   16.10    1.10
  -6   3   3   15.20    1.20
   6  -3   3   15.60    1.20
   6   3  -3   16.40    1.20
   6   3  -3   14.30    1.20
  -6   3   3   15.40    1.30
  -6   3   3   14.10    1.10
  -6  -3  -3   14.10    1.10
  -6  -3  -3   14.30    1.20
   6  -3  -3   14.60    1.10
   6   3   3   15.00    1.10
  -6  -3   3   12.40    0.80
  -6   3  -3   14.40    1.20
  -6   3  -3   14.40    1.30
   6   3   3   15.80    1.20
   6  -3  -3   13.20    1.20
   6  -3  -3   13.70    1.00
  -6   3  -3   12.50    1.20
  -6  -3   3   16.50    1.30
  -7  -3  -3  251.87    5.80
   7  -3   3  256.47    5.80
  -7   3   3  248.68    5.70
   7   3  -3  248.98    6.00
  -7   3   3  253.57    6.30
   7   3  -3  243.48    5.80
  -7   3   3  250.57    5.90
   7  -3   3  245.28    5.20
  -7  -3  -3  252.37    6.10
  -7   3  -3  250.47    6.10
  -7   3  -3  253.27    5.50
  -7  -3   3  255.97    4.90
   7   3   3  258.67    6.00
   7   3   3  254.67    5.90
  -7  -3   3  254.87    5.80
  -7   3  -3  248.38    6.30
  -7  -3   3  242.68    6.00
   7  -3  -3  248.98    5.60
   8   3  -3  234.28    6.70
   8  -3   3  249.97    6.00
  -8  -3  -3  245.58    6.30
   8  -3   3  244.08    5.40
  -8  -3  -3  246.18    5.90
  -8   3   3  241.78    5.70
  -8   3   3  245.58    6.40
  -8   3   3  233.68    6.00
   8   3  -3  231.68    6.00
   8  -3  -3  244.48    5.80
   8   3   3  246.88    6.00
  -8   3  -3  246.58    6.40
  -8  -3   3  244.08    5.00
  -8   3  -3  246.18    5.70
  -8  -3   3  245.28    6.30
  -8  -3   3  236.48    5.80
   8   3   3  242.78    6.10
   8  -3  -3  246.98    6.30
  -8   3  -3  244.48    6.40
  -9   3   3  172.68    4.70
   9   3  -3  165.58    5.00
  -9  -3  -3  174.78    5.30
  -9  -3  -3  167.78    4.70
   9  -3   3  166.98    4.90
  -9   3   3  171.98    5.10
   9  -3   3  174.98    4.50
  -9   3   3  166.28    5.30
  -9   3  -3  168.28    5.30
  -9  -3   3  169.78    4.90
   9  -3  -3  167.88    4.70
  -9   3  -3  168.18    4.70
   9   3   3  166.18    5.00
  -9  -3   3  171.48    5.30
  -9   3  -3  172.28    5.40
  10  -3   3   17.40    1.40
 -10  -3  -3   15.90    1.50
 -10   3   3   17.00    1.60
 -10   3   3   17.50    1.80
 -10   3   3   15.70    1.40
 -10  -3  -3   13.70    1.80
 -10   3  -3   21.00    2.00
 -10  -3   3   18.80    1.80
 -10  -3   3   20.30    1.30
 -10   3  -3   17.80    1.70
 -10  -3   3   17.80    1.70
 -10   3  -3   17.70    1.50
 -11   3   3   36.90    2.20
 -11   3   3   41.50    2.80
 -11  -3  -3   35.60    2.20
 -11  -3  -3   41.20    2.70
 -11   3   3   37.30    2.50
 -11   3  -3   36.00    2.60
 -11  -3   3   38.00    2.40
 -11   3  -3   35.00    2.50
 -11   3  -3   35.60    2.20
 -11  -3   3   32.60    2.40
 -11  -3   3   34.70    1.70
 -12  -3  -3   67.09    3.70
 -12   3   3   60.99    2.90
 -12   3   3   63.09    3.40
 -12   3   3   63.69    3.70
 -12  -3   3   62.69    3.40
 -12  -3   3   64.39    3.30
 -12  -3   3   60.99    2.60
 -12  -3   3   58.59    2.40
 -12   3  -3   68.79    3.50
 -12   3  -3   59.59    3.50
 -12   3  -3   61.09    3.10
 -13   3   3   42.50    2.50
 -13   3   3   44.60    3.20
 -13   3   3   40.40    4.30
 -13   3  -3   40.40    2.90
 -13   3  -3   41.00    2.60
 -13  -3   3   43.90    2.20
 -13   3  -3   38.00    3.00
 -13  -3   3   36.50    2.80
  13  -3  -3   44.40    4.30
   0   4  -3 1138.99   16.70
   0  -4  -3 1145.79   18.00
   0   4   3 1127.39   18.00
   0   4  -3 1125.99   17.90
   0  -4   3 1130.99   17.90
   0  -4  -3 1131.69   17.40
   0   4  -3 1136.69   17.10
   0  -4  -3 1149.19   18.00
   0   4   3 1132.29   17.50
  -1   4   3  159.18    3.20
  -1  -4  -3  152.88    3.60
   1   4  -3  153.58    3.40
  -1  -4  -3  154.88    3.30
   1   4  -3  153.08    2.90
  -1   4   3  152.08    3.30
  -1   4   3  146.19    3.60
   1   4  -3  155.58    3.00
  -1  -4  -3  150.68    3.60
   1   4   3  144.49    3.50
   1  -4  -3  149.79    3.10
  -1  -4   3  149.88    3.30
  -1   4  -3  153.68    3.60
   1  -4  -3  145.29    3.50
   1   4   3  146.19    3.10
   1  -4  -3  142.49    3.50
  -1   4  -3  145.69    3.00
   2   4  -3  160.88    3.40
  -2   4   3  156.78    3.40
  -2  -4  -3  160.58    3.80
  -2  -4  -3  163.68    3.60
  -2   4   3  164.28    3.90
   2  -4   3  161.68    4.00
  -2   4   3  159.98    3.50
  -2   4   3  160.08    3.80
   2   4  -3  164.68    3.70
   2  -4   3  161.98    2.70
   2   4  -3  161.68    3.30
   2   4  -3  165.18    3.20
   2  -4   3  166.28    3.00
   2   4   3  173.08    3.60
   2  -4  -3  172.58    4.00
  -2   4  -3  169.88    3.20
  -2  -4   3  166.98    3.60
  -2   4  -3  170.48    4.10
   2   4   3  168.58    4.00
   2  -4  -3  172.48    3.60
  -2   4  -3  168.18    3.50
   2  -4  -3  170.98    4.00
  -3   4   3  187.68    4.60
   3  -4   3  201.58    3.80
  -3  -4  -3  193.08    4.30
  -3   4   3  182.98    4.10
   3  -4   3  187.78    3.40
   3   4  -3  192.58    3.90
   3   4  -3  199.68    3.90
  -3   4   3  191.98    4.20
   3   4  -3  191.08    4.30
  -3   4   3  188.08    4.40
  -3  -4  -3  194.58    4.40
   3  -4  -3  195.08    4.50
   3   4   3  194.28    4.50
   3  -4  -3  199.18    4.00
   3  -4  -3  186.88    4.00
  -3  -4   3  193.48    3.60
   3   4   3  197.08    4.20
  -3  -4   3  194.08    3.70
  -3   4  -3  193.08    4.20
  -3   4  -3  189.18    4.70
   3  -4  -3  196.68    5.00
  -3   4  -3  191.88    3.70
  -3  -4   3  199.38    3.90
   4  -4   3   16.10    0.90
  -4  -4  -3   17.10    1.20
  -4   4   3   15.00    1.00
  -4   4   3   15.70    1.20
   4   4  -3   14.50    0.90
   4  -4   3   15.20    0.80
  -4  -4  -3   16.60    1.20
   4   4  -3   14.20    1.00
   4   4  -3   15.30    1.10
  -4   4   3   16.70    1.20
   4  -4  -3   16.20    1.00
  -4  -4   3   15.00    0.90
  -4   4  -3   16.50    1.30
  -4   4  -3   15.80    1.10
   4   4   3   17.40    1.10
   4  -4  -3   16.10    1.00
  -4  -4   3   16.30    0.90
   4  -4  -3   14.70    1.20
  -4   4  -3   14.50    0.80
   4   4   3   16.20    1.40
   4  -4  -3   17.30    1.20
   5  -4   3  152.68    3.30
   5   4  -3  158.28    3.80
  -5  -4  -3  150.18    4.10
   5   4  -3  157.58    4.10
  -5   4   3  153.98    3.90
   5  -4   3  157.38    3.80
   5   4  -3  153.38    3.40
  -5  -4  -3  153.18    4.00
  -5   4   3  149.99    4.00
  -5   4  -3  147.39    3.50
   5   4   3  151.48    3.80
   5  -4  -3  147.39    3.80
   5  -4  -3  156.58    4.20
   5  -4  -3  154.78    4.10
  -5   4  -3  155.28    4.40
   5   4   3  148.39    4.00
  -5  -4   3  158.18    3.60
  -5  -4   3  155.38    3.40
  -5   4  -3  154.68    4.00
   5  -4  -3  156.48    3.70
   6  -4   3   45.10    1.90
   6  -4   3   44.40    1.60
  -6  -4  -3   43.20    2.00
  -6   4   3   47.80    2.30
  -6   4   3   43.10    2.00
   6   4  -3   44.40    2.10
   6   4  -3   47.20    2.00
  -6  -4  -3   43.20    2.10
  -6   4   3   45.70    2.00
   6  -4  -3   45.60    2.20
   6   4   3   44.40    2.00
  -6   4  -3   42.20    1.70
  -6  -4   3   41.20    2.00
  -6  -4   3   45.60    1.60
   6  -4  -3   48.10    2.00
  -6   4  -3   45.70    2.30
   6   4   3   46.80    2.20
   6  -4  -3   45.90    1.80
  -6   4  -3   43.40    2.10
  -7   4   3  100.69    3.60
  -7  -4  -3   99.69    3.30
   7   4  -3   99.39    3.30
  -7   4   3   94.79    3.30
   7  -4   3   97.29    3.20
  -7   4   3   88.39    3.20
   7  -4   3   96.89    2.70
  -7  -4  -3   95.69    3.50
   7   4  -3   98.39    3.40
  -7   4  -3  101.29    3.00
   7  -4  -3  101.69    3.30
   7  -4  -3   94.29    3.50
  -7  -4   3  100.79    2.60
  -7   4  -3   97.89    3.70
  -7  -4   3   97.29    3.10
  -7   4  -3   99.49    3.50
   7   4   3   98.99    3.30
   7  -4  -3   96.79    3.00
   7   4   3  100.09    3.40
   8  -4   3  169.48    4.20
   8  -4   3  176.88    4.80
  -8  -4  -3  169.88    5.00
   8   4  -3  169.68    4.90
  -8   4   3  181.08    5.00
  -8  -4  -3  170.28    4.70
  -8   4   3  171.08    4.80
  -8   4   3  176.68    5.30
   8  -4  -3  169.58    4.80
   8  -4  -3  174.18    4.60
   8  -4  -3  167.18    5.10
  -8   4  -3  170.58    5.20
   8   4   3  170.08    4.80
  -8  -4   3  166.98    4.60
  -8   4  -3  171.78    4.50
   8   4   3  169.38    5.00
  -8  -4   3  178.48    4.00
  -8   4  -3  180.68    5.40
  -9   4   3   89.69    5.00
  -9  -4  -3  102.59    3.60
   9  -4   3   97.39    3.50
  -9   4   3   97.79    3.80
   9  -4   3   99.69    3.10
  -9  -4  -3  104.29    4.00
  -9   4   3   96.69    3.50
   9  -4  -3  100.09    3.40
  -9  -4   3   97.49    2.80
  -9  -4   3   98.29    3.60
  -9   4  -3   87.19    3.80
   9  -4  -3  100.99    3.70
  -9   4  -3  102.39    3.50
  10  -4   3    8.10    1.10
 -10  -4  -3   10.50    1.60
 -10  -4  -3    9.60    1.40
 -10   4   3    7.40    1.30
 -10   4   3   10.20    1.40
 -10   4   3    8.70    1.50
 -10   4  -3   10.30    1.90
 -10   4  -3    8.80    1.30
 -10   4  -3    9.80    1.60
  10  -4  -3    9.10    1.40
 -10  -4   3    9.80    1.00
 -10  -4   3    7.60    1.30
 -11   4   3    5.40    1.20
 -11   4   3    2.60    1.00
 -11   4   3    3.20    0.90
 -11  -4  -3    4.80    1.20
  11  -4  -3    5.60    1.10
 -11   4  -3    4.80    1.00
 -11   4  -3    6.10    1.20
 -11   4  -3    4.50    1.20
 -11  -4   3    6.40    0.90
 -11  -4   3    4.80    1.10
 -12   4   3   15.90    2.10
 -12  -4  -3   17.50    2.30
 -12   4   3   15.70    2.20
 -12   4   3   16.20    1.70
 -12   4  -3   19.50    1.90
  12  -4  -3   15.00    1.90
 -12   4  -3   19.00    2.10
 -12   4  -3   15.70    2.10
 -12  -4   3   15.30    1.40
 -12  -4   3   17.20    1.80
   0   5  -3  529.65    8.20
   0  -5  -3  531.75    9.60
   0   5   3  514.55    9.50
   0  -5   3  539.35    9.50
   0   5   3  550.84    9.70
   0  -5  -3  515.05    8.80
   0   5   3  517.75    8.90
   0   5  -3  527.85    9.40
   0   5  -3  532.75    8.80
   0  -5  -3  528.75    9.40
  -1  -5  -3  297.07    6.00
   1   5  -3  285.17    4.90
  -1  -5  -3  292.37    6.00
  -1   5   3  284.97    6.00
  -1  -5  -3  281.47    5.40
   1   5  -3  292.47    5.40
  -1   5   3  286.67    6.10
   1   5  -3  290.07    5.80
   1  -5   3  280.17    4.60
  -1   5   3  289.47    5.50
   1  -5  -3  282.67    5.20
   1   5   3  278.87    5.90
  -1   5  -3  279.07    4.60
  -1  -5   3  274.27    5.60
   1  -5  -3  287.37    5.90
   1   5   3  274.07    5.30
  -1   5  -3  276.37    5.90
   1  -5  -3  289.37    5.80
  -1   5  -3  285.47    5.30
  -2  -5  -3   83.69    3.10
  -2  -5  -3   83.59    2.70
  -2   5   3   82.29    3.10
   2   5  -3   82.89    2.40
   2  -5   3   83.39    1.90
  -2  -5  -3   82.59    2.40
  -2   5   3   82.49    2.30
   2  -5   3   82.59    1.60
  -2   5   3   80.79    2.30
  -2   5   3   81.49    2.70
   2  -5   3   85.09    2.80
   2   5  -3   80.39    2.10
  -2  -5   3   82.69    2.40
   2   5   3   87.79    2.40
   2  -5  -3   81.79    2.70
   2  -5  -3   84.79    2.70
  -2   5  -3   86.29    2.80
  -2   5  -3   86.79    2.40
   2  -5  -3   82.49    2.30
  -2   5  -3   86.99    2.00
   3  -5   3   54.69    1.70
   3   5  -3   52.39    1.80
   3   5  -3   53.89    2.10
   3   5  -3   53.99    1.80
  -3   5   3   59.19    2.30
  -3  -5  -3   53.19    2.10
  -3   5   3   55.79    1.90
  -3  -5  -3   56.59    2.10
  -3   5   3   53.69    2.20
   3  -5   3   53.79    1.40
   3  -5  -3   50.99    1.80
   3   5   3   54.19    2.20
   3   5   3   56.39    1.90
  -3   5  -3   53.69    2.30
   3  -5  -3   55.89    2.20
  -3  -5   3   55.99    1.60
  -3   5  -3   56.79    2.00
  -3   5  -3   55.79    1.60
   3  -5  -3   55.09    2.20
  -3  -5   3   55.69    1.90
  -3  -5   3   58.59    1.50
  -4  -5  -3  213.88    5.00
   4   5  -3  222.68    4.70
  -4  -5  -3  212.98    5.00
  -4   5   3  211.98    5.30
   4   5  -3  216.18    4.50
  -4   5   3  217.48    4.80
   4   5  -3  210.98    5.00
   4  -5   3  217.98    4.50
  -4   5   3  214.58    5.10
   4  -5   3  211.18    4.00
   4  -5  -3  213.48    5.10
  -4   5  -3  206.38    5.30
  -4   5  -3  212.98    4.30
  -4  -5   3  211.98    4.20
   4  -5  -3  214.98    4.50
   4   5   3  216.98    4.70
  -4  -5   3  214.58    4.50
   4  -5  -3  212.38    5.20
   4   5   3  215.28    5.10
   4  -5  -3  206.98    4.60
  -4   5  -3  212.98    4.90
   5   5  -3  141.49    3.70
   5  -5   3  137.79    3.20
  -5  -5  -3  138.49    3.90
   5  -5   3  139.59    3.50
   5   5  -3  137.19    3.40
   5   5  -3  134.09    3.70
  -5  -5  -3  136.99    3.90
  -5   5   3  142.69    4.00
   5  -5   3  137.39    3.10
  -5   5   3  142.79    3.80
   5   5  -3  136.79    4.00
  -5   5   3  142.19    4.20
   5  -5  -3  137.89    4.00
  -5  -5   3  138.69    3.40
  -5   5  -3  137.59    3.90
   5  -5  -3  146.99    4.20
  -5  -5   3  137.89    3.30
  -5   5  -3  136.09    4.20
   5  -5  -3  140.29    3.50
   5   5   3  141.49    3.70
   5   5   3  137.79    4.00
   5  -5  -3  137.79    3.60
  -5   5  -3  141.49    3.40
   5   5   3  138.49    4.00
   6  -5   3  224.08    5.10
  -6  -5  -3  230.88    5.60
  -6   5   3  225.48    5.60
   6   5  -3  226.08    5.40
  -6   5   3  228.98    5.50
   6   5  -3  217.48    5.20
   6  -5   3  217.18    4.70
   6   5  -3  224.98    5.60
   6  -5   3  223.78    4.60
  -6  -5  -3  224.18    5.40
  -6   5  -3  225.48    4.90
   6   5   3  224.78    5.30
   6  -5  -3  230.58    5.30
   6  -5  -3  220.08    5.60
  -6   5  -3  205.88    5.50
  -6  -5   3  220.78    5.00
  -6  -5   3  219.28    4.70
   6  -5  -3  225.58    5.00
   6  -5  -3  226.28    5.70
   6   5   3  234.48    5.70
  -6   5  -3  217.78    5.90
  -7   5   3   21.20    1.80
   7  -5   3   20.00    1.20
   7   5  -3   25.40    1.70
  -7   5   3   20.10    1.60
   7   5  -3   20.70    1.60
  -7   5   3   22.50    1.60
   7   5  -3   22.60    1.70
   7  -5   3   21.20    1.50
  -7  -5  -3   20.90    1.70
  -7  -5  -3   20.10    1.50
   7  -5  -3   25.00    1.50
  -7  -5   3   25.10    1.30
  -7   5  -3   23.20    1.90
   7  -5  -3   25.00    1.60
  -7  -5   3   23.50    1.50
  -7   5  -3   24.50    1.80
  -7   5  -3   23.70    1.40
   7  -5  -3   22.90    2.00
   7   5   3   23.90    1.60
   7   5   3   22.90    2.00
   8   5  -3   14.30    1.30
   8  -5   3   17.10    1.20
  -8  -5  -3   15.70    1.50
  -8  -5  -3   12.60    1.30
   8  -5   3   13.40    1.30
   8   5  -3   14.30    1.40
  -8   5   3   16.50    1.70
  -8   5   3   14.50    1.40
  -8   5   3   13.70    1.40
   8   5  -3   15.50    1.90
   8  -5  -3   14.40    1.20
  -8   5  -3   16.10    1.60
  -8   5  -3   12.10    1.20
   8  -5  -3   15.70    1.40
  -8   5  -3   11.90    1.60
   8   5   3   15.50    1.50
  -8  -5   3   11.50    1.20
  -8  -5   3   14.70    1.10
   8  -5  -3   14.60    1.80
  -9   5   3   23.70    2.00
   9  -5   3   20.20    1.60
  -9   5   3   23.00    1.80
  -9  -5  -3   20.40    1.70
  -9  -5  -3   19.70    1.80
   9  -5   3   21.70    1.40
  -9   5  -3   18.50    1.80
  -9  -5   3   21.10    1.30
   9  -5  -3   19.90    1.70
  -9  -5   3   20.90    1.60
  -9   5  -3   24.20    1.70
  -9   5  -3   22.10    1.90
 -10   5   3   26.80    2.30
 -10  -5  -3   36.40    2.50
  10  -5   3   35.00    1.90
 -10   5   3   33.70    2.20
 -10   5   3   32.80    2.20
 -10  -5  -3   32.80    2.10
  10  -5  -3   32.60    2.20
 -10   5  -3   31.30    2.40
 -10   5  -3   30.40    2.40
 -10   5  -3   32.70    2.10
 -10  -5   3   32.60    1.70
 -10  -5   3   34.30    2.10
 -11   5   3   22.00    1.90
 -11   5   3   25.30    2.40
 -11   5   3   26.70    2.20
 -11  -5  -3   23.00    2.10
 -11   5  -3   21.00    2.10
  11  -5  -3   21.90    2.00
 -11   5  -3   23.90    2.30
 -11   5  -3   23.00    1.90
 -11  -5   3   22.40    1.50
 -12   5   3   38.20    2.50
 -12   5   3   44.50    4.80
 -12  -5  -3   35.40    2.70
 -12   5   3   34.40    2.60
 -12  -5   3   33.90    1.80
  12  -5  -3   34.10    2.50
 -12   5  -3   39.20    2.40
 -12   5  -3   37.60    2.80
 -12  -5   3   38.70    2.50
   0  -6  -3  565.84   10.10
   0   6  -3  556.34    8.80
   0   6  -3  542.75   10.20
   0   6   3  557.54   10.30
   0  -6  -3  573.24   10.40
   0  -6   3  541.45    8.90
   0  -6  -3  539.95    9.50
   0   6  -3  553.34    9.60
   0   6   3  584.44   10.50
   0   6   3  566.74    9.60
   0  -6   3  561.14   10.30
  -1  -6  -3  367.06    7.30
   1   6  -3  358.36    6.10
   1  -6   3  377.56    7.60
   1  -6   3  357.16    5.90
  -1  -6  -3  360.16    7.40
  -1   6   3  369.26    7.50
   1   6  -3  368.06    6.80
   1   6  -3  362.66    8.00
  -1   6   3  366.26    7.50
  -1   6  -3  353.66    7.40
  -1   6  -3  359.76    5.90
  -1  -6   3  369.66    7.20
   1  -6  -3  371.16    7.20
   1   6   3  360.96    6.60
   1  -6  -3  357.26    6.50
  -1   6  -3  350.46    6.70
   1   6   3  354.36    7.30
  -2   6   3   45.70    2.10
  -2  -6  -3   46.60    1.80
  -2   6   3   48.20    1.80
  -2   6   3   46.00    1.70
  -2   6   3   42.60    2.10
   2  -6   3   46.80    1.40
   2   6  -3   46.70    1.90
   2  -6   3   42.90    1.10
  -2  -6  -3   44.70    2.00
  -2  -6  -3   48.50    2.10
   2   6  -3   46.90    1.50
   2  -6   3   48.60    2.20
   2   6   3   51.39    2.20
   2   6   3   49.70    1.80
  -2  -6   3   51.89    2.00
  -2   6  -3   50.19    1.90
   2  -6  -3   51.59    2.20
  -2   6  -3   49.00    1.50
   2  -6  -3   50.39    2.10
  -2   6  -3   45.80    2.20
   2  -6  -3   51.29    1.70
  -3   6   3   13.30    1.00
  -3   6   3   15.00    1.30
  -3  -6  -3   14.30    1.20
  -3   6   3   17.30    1.10
   3  -6   3   15.20    0.70
   3  -6   3   16.30    1.30
  -3  -6  -3   16.70    1.20
  -3   6   3   15.30    1.30
   3   6  -3   13.30    1.00
  -3  -6  -3   14.30    1.20
  -3   6  -3   18.20    1.40
   3  -6  -3   16.00    1.20
   3   6   3   16.60    1.30
  -3   6  -3   15.70    0.90
   3  -6  -3   14.90    1.00
   3   6   3   14.90    1.00
   4   6  -3   82.29    2.60
  -4  -6  -3   82.29    2.80
   4   6  -3   77.59    2.80
  -4   6   3   82.29    3.00
  -4   6   3   75.49    3.00
  -4  -6  -3   80.89    2.90
   4   6  -3   79.09    2.50
  -4  -6  -3   74.99    2.80
   4  -6   3   80.89    2.30
  -4   6   3   77.69    2.60
   4  -6   3   78.69    1.90
   4  -6  -3   80.39    2.50
   4   6   3   77.29    2.50
   4  -6  -3   84.09    3.10
   4  -6  -3   80.89    2.90
  -4   6  -3   77.99    2.70
  -4  -6   3   80.89    2.20
  -4  -6   3   76.49    2.20
  -4   6  -3   76.79    3.00
  -4   6  -3   81.49    2.40
   4   6   3   78.19    2.90
  -5  -6  -3   15.30    1.30
   5  -6   3   18.00    1.00
   5   6  -3   16.80    1.30
   5  -6   3   15.10    1.10
  -5   6   3   16.50    1.50
   5   6  -3   16.40    1.20
   5   6  -3   18.10    1.20
  -5   6   3   16.10    1.40
  -5   6   3   17.30    1.30
  -5  -6  -3   16.60    1.40
   5  -6  -3   18.40    1.50
   5   6   3   17.40    1.30
   5  -6  -3   17.20    1.20
   5   6   3   15.40    1.30
  -5   6  -3   15.90    1.10
  -5  -6   3   17.60    1.20
  -5  -6   3   17.50    1.10
  -5   6  -3   14.80    1.40
   5  -6  -3   17.00    1.40
   5   6   3   17.80    1.50
  -5  -6   3   15.90    1.00
  -5   6  -3   14.90    1.30
   6   6  -3   18.00    1.50
   6  -6   3   17.80    1.30
   6   6  -3   16.60    1.40
  -6   6   3   16.20    1.50
  -6  -6  -3   16.30    1.50
  -6   6   3   18.90    1.40
   6  -6   3   15.60    1.00
  -6  -6  -3   16.40    1.40
  -6   6   3   17.60    1.70
  -6   6  -3   18.60    1.60
   6  -6  -3   17.00    1.20
  -6   6  -3   19.60    1.60
   6  -6  -3   19.50    1.60
  -6  -6   3   18.00    1.20
  -6   6  -3   22.40    1.30
   6  -6  -3   18.90    1.60
   6  -6  -3   17.90    1.30
  -6  -6   3   19.90    1.20
   7   6  -3  159.78    4.50
   7  -6   3  157.08    3.90
   7  -6   3  158.08    3.70
  -7  -6  -3  157.18    4.80
  -7   6   3  158.18    4.60
   7  -6   3  162.38    4.40
   7   6  -3  153.58    4.80
  -7  -6  -3  163.68    4.60
  -7   6   3  155.48    5.10
  -7   6   3  158.78    4.80
   7   6   3  161.48    4.60
  -7   6  -3  164.68    5.00
   7   6   3  156.48    4.80
  -7  -6   3  156.88    4.10
   7  -6  -3  148.39    4.70
  -7   6  -3  164.88    4.30
   7  -6  -3  160.28    4.10
  -7  -6   3  162.08    4.00
  -7   6  -3  150.38    5.10
   7  -6  -3  157.88    4.40
   8  -6   3   26.20    1.50
  -8   6   3   20.40    1.70
  -8   6   3   22.50    1.70
   8  -6   3   26.20    1.40
  -8  -6  -3   22.30    1.80
   8  -6   3   22.60    1.60
  -8   6   3   22.40    2.00
  -8   6  -3   19.90    1.90
  -8   6  -3   21.90    1.60
  -8   6  -3   22.90    1.90
   8  -6  -3   23.30    1.70
  -8  -6   3   20.80    1.40
   8  -6  -3   25.00    1.60
  -8  -6   3   24.10    1.60
  -9  -6  -3   22.00    1.90
  -9   6   3   20.70    1.80
   9  -6   3   17.50    1.60
   9  -6   3   22.60    1.40
   9  -6   3   22.50    1.50
  -9   6   3   19.80    2.00
  -9   6   3   20.30    1.70
  -9  -6  -3   21.40    1.80
  -9   6  -3   21.40    1.60
  -9  -6   3   21.00    1.40
   9  -6  -3   22.20    1.70
  -9   6  -3   20.80    1.90
  -9  -6   3   19.60    1.60
  -9   6  -3   19.40    1.90
  10  -6   3   34.00    2.00
 -10   6   3   30.90    2.20
  10  -6   3   30.40    2.00
 -10   6   3   25.50    2.30
 -10  -6  -3   29.40    2.30
 -10   6   3   32.60    2.30
 -10  -6   3   27.80    1.60
 -10  -6   3   33.50    2.10
 -10   6  -3   28.50    2.40
 -10   6  -3   30.60    2.00
 -10   6  -3   30.90    2.40
  10  -6  -3   32.10    2.10
  11  -6   3   20.40    1.70
 -11   6   3   16.50    2.00
 -11   6   3   15.50    2.00
 -11   6   3   19.50    2.50
 -11  -6  -3   22.90    2.10
  11  -6  -3   16.30    1.70
 -11   6  -3   17.40    1.70
 -11   6  -3   18.70    2.40
 -11  -6   3   18.00    2.50
 -11   6  -3   13.70    2.00
 -11  -6   3   16.70    1.40
 -12   6   3   28.80    2.60
 -12   6   3   32.10    2.50
 -12  -6  -3   30.40    2.50
 -12   6   3   27.50    2.40
  12  -6   3   28.70    2.10
 -12   6  -3   34.00    2.40
 -12  -6   3   30.50    2.30
  12  -6  -3   26.30    2.20
 -12   6  -3   23.90    2.50
 -12   6  -3   30.30    2.60
   0  -7  -3   61.29    2.40
   0  -7  -3   55.29    2.00
   0  -7   3   62.09    2.50
   0   7   3   58.69    2.50
   0   7  -3   61.69    2.20
   0  -7   3   56.99    1.70
   0  -7  -3   54.59    2.40
   0   7  -3   58.49    1.60
   0   7   3   55.19    2.00
   0   7  -3   59.09    2.40
   1   7  -3  181.78    4.60
  -1  -7  -3  179.18    4.70
  -1  -7  -3  177.28    4.50
  -1   7   3  175.28    4.80
  -1  -7  -3  175.68    4.10
   1  -7   3  180.98    4.80
  -1   7   3  175.78    4.10
   1   7  -3  180.48    3.50
   1   7  -3  173.48    4.20
   1  -7   3  176.48    3.40
  -1   7   3  172.48    4.80
   1   7   3  176.28    4.00
   1  -7  -3  180.88    4.00
   1  -7  -3  173.18    4.80
  -1   7  -3  173.78    4.20
   1  -7  -3  177.68    4.50
   1   7   3  178.28    4.80
  -1   7  -3  173.78    3.30
  -1   7  -3  171.28    4.70
  -1  -7   3  177.28    4.60
  -2   7   3  245.58    5.20
   2  -7   3  246.88    4.50
  -2  -7  -3  238.88    5.80
  -2   7   3  234.98    5.90
  -2  -7  -3  252.07    5.70
  -2  -7  -3  246.68    5.40
  -2   7   3  246.08    6.00
   2   7  -3  247.78    4.70
  -2   7   3  243.08    5.20
   2   7  -3  239.58    5.50
   2  -7   3  238.28    6.00
   2  -7   3  242.48    4.20
   2  -7  -3  238.78    5.00
  -2  -7   3  251.47    5.70
  -2   7  -3  250.37    4.90
  -2   7  -3  246.38    5.40
  -2   7  -3  236.68    6.00
   2  -7  -3  249.28    5.70
   2   7   3  249.18    5.20
   2  -7  -3  247.78    6.00
   2   7   3  244.98    5.90
   3  -7   3   57.09    1.50
   3  -7   3   58.89    2.70
   3   7  -3   55.29    2.30
  -3  -7  -3   57.59    2.50
  -3  -7  -3   59.69    2.50
   3   7  -3   56.79    1.90
  -3   7   3   58.99    2.70
  -3   7   3   54.79    2.50
  -3   7   3   54.59    2.10
   3  -7   3   55.89    1.80
  -3   7   3   55.79    2.20
  -3  -7  -3   52.69    2.20
   3   7  -3   56.79    2.30
  -3   7  -3   56.19    2.30
   3   7   3   56.29    2.10
   3  -7  -3   56.79    2.40
   3  -7  -3   55.89    2.00
  -3   7  -3   56.39    1.90
  -3  -7   3   58.49    2.30
   3   7   3   53.59    2.50
   3  -7  -3   56.09    2.60
  -3   7  -3   54.49    2.60
  -4   7   3   53.59    2.20
  -4  -7  -3   52.69    2.40
  -4  -7  -3   55.29    2.50
   4   7  -3   50.69    2.10
  -4   7   3   48.00    2.50
   4   7  -3   55.69    2.10
  -4  -7  -3   54.19    2.40
  -4   7   3   53.29    2.60
  -4  -7  -3   53.69    2.30
   4  -7   3   53.99    1.90
   4   7  -3   52.69    2.40
   4  -7   3   51.49    1.50
  -4  -7   3   56.39    1.70
  -4   7  -3   51.89    2.60
   4  -7  -3   51.09    2.00
   4   7   3   51.09    2.10
  -4  -7   3   55.79    1.70
   4  -7  -3   51.99    2.40
  -4   7  -3   53.69    1.90
   4  -7  -3   53.09    2.60
   4   7   3   49.70    2.40
  -4   7  -3   52.89    2.30
  -4  -7   3   54.19    2.20
   5   7  -3   56.29    2.30
  -5   7   3   58.99    2.80
  -5  -7  -3   60.89    2.60
  -5   7   3   56.89    2.70
  -5  -7  -3   58.09    2.60
   5  -7   3   56.89    2.10
   5   7  -3   55.09    2.60
   5   7  -3   57.09    2.20
  -5   7   3   54.49    2.40
   5  -7   3   57.59    1.70
  -5   7  -3   59.39    2.90
  -5  -7   3   61.29    2.40
   5   7   3   65.79    2.50
   5  -7  -3   61.69    2.90
   5   7   3   59.09    2.70
   5  -7  -3   62.29    2.70
  -5  -7   3   59.59    2.00
  -5   7  -3   61.59    2.20
   5   7   3   59.79    2.80
   5  -7  -3   62.69    2.30
  -5  -7   3   58.69    2.00
  -5   7  -3   61.39    2.70
   6   7  -3  187.78    4.80
   6  -7   3  190.48    4.60
  -6   7   3  187.98    5.00
  -6   7   3  181.38    5.50
  -6   7   3  185.18    5.40
   6   7  -3  183.48    5.30
  -6  -7  -3  188.38    5.10
   6  -7   3  187.08    4.10
  -6  -7  -3  182.78    5.10
   6   7  -3  184.18    4.70
   6   7   3  183.18    5.30
   6  -7  -3  184.78    4.70
   6   7   3  189.58    4.90
   6  -7  -3  188.18    5.40
  -6  -7   3  188.98    4.30
  -6   7  -3  192.28    5.40
  -6  -7   3  202.88    4.80
   6  -7  -3  181.38    5.50
  -6   7  -3  185.48    4.60
   6   7   3  185.28    5.40
  -6  -7   3  191.58    4.50
  -6   7  -3  179.08    5.60
  -7   7   3  151.78    4.90
  -7  -7  -3  154.18    4.60
  -7   7   3  150.48    4.60
   7  -7   3  156.68    3.80
   7  -7   3  150.68    4.20
  -7  -7  -3  153.88    4.70
   7   7  -3  146.89    4.40
  -7   7  -3  154.78    4.90
   7  -7  -3  149.59    4.30
  -7  -7   3  153.58    4.00
  -7   7  -3  156.48    5.30
   7  -7  -3  145.99    4.70
  -7   7  -3  149.79    4.20
  -7  -7   3  155.48    4.10
  -8  -7  -3   62.09    3.00
  -8  -7  -3   60.19    2.80
  -8   7   3   65.69    3.10
   8  -7   3   66.29    2.40
  -8   7   3   60.39    3.30
  -8   7   3   58.29    3.00
   8  -7  -3   59.49    2.60
  -8  -7   3   61.99    2.50
  -8   7  -3   62.49    3.20
  -8   7  -3   58.79    2.50
  -8  -7   3   57.79    2.40
  -8   7  -3   64.89    3.40
  -9   7   3   40.00    2.50
   9  -7   3   40.80    2.00
  -9   7   3   40.90    2.50
   9  -7   3   41.60    1.90
  -9   7   3   39.70    2.80
   9  -7   3   41.90    2.30
  -9  -7  -3   42.40    2.60
  -9  -7   3   36.50    1.90
  -9  -7   3   40.30    2.10
  -9   7  -3   40.90    2.80
  -9   7  -3   38.00    2.60
  -9   7  -3   41.20    2.20
 -10   7   3   66.69    3.40
  10  -7   3   71.19    2.90
 -10   7   3   69.29    3.50
 -10  -7  -3   66.69    3.40
 -10   7   3   63.59    3.60
 -10   7  -3   67.49    3.70
 -10   7  -3   71.19    3.10
 -10   7  -3   63.09    3.60
  10  -7  -3   61.49    3.00
 -10  -7   3   71.79    3.00
 -10  -7   3   67.09    2.60
  11  -7   3   64.99    2.90
 -11  -7  -3   70.89    3.60
 -11   7   3   76.39    3.70
 -11   7   3   67.19    3.50
 -11  -7   3   67.29    2.70
  11  -7  -3   73.49    3.30
 -11   7  -3   68.09    3.90
 -11   7  -3   75.89    4.00
 -11  -7   3   68.99    3.10
 -11   7  -3   71.69    3.20
   0  -8  -3  233.88    5.90
   0   8   3  221.68    5.80
   0  -8  -3  232.78    5.50
   0   8  -3  222.28    5.30
   0   8   3  221.88    4.90
   0   8  -3  236.58    5.80
   0  -8   3  226.48    5.80
   0  -8  -3  223.68    4.90
   0   8  -3  222.98    4.30
  -1  -8  -3  293.77    6.50
  -1   8   3  290.97    7.00
  -1   8   3  297.37    6.10
  -1  -8  -3  289.47    6.10
  -1  -8  -3  289.87    6.90
  -1   8   3  297.77    7.00
   1  -8   3  286.57    5.20
   1  -8   3  288.27    7.00
   1   8  -3  298.17    5.40
   1   8  -3  295.17    6.70
   1   8   3  291.97    6.90
   1  -8  -3  298.67    6.60
  -1  -8   3  291.27    6.80
   1   8   3  295.67    6.00
  -1   8  -3  288.57    5.20
   1  -8  -3  299.97    5.90
  -1   8  -3  291.67    6.90
  -1   8  -3  294.47    6.40
   1  -8  -3  289.77    7.00
  -2   8   3   46.20    1.90
  -2  -8  -3   46.00    2.30
  -2   8   3   42.20    1.90
   2   8  -3   44.70    1.60
   2   8  -3   44.90    2.20
  -2  -8  -3   39.10    2.10
  -2   8   3   43.40    2.30
  -2   8   3   49.60    2.50
   2  -8   3   42.60    1.30
  -2  -8  -3   43.10    2.00
  -2   8  -3   40.00    1.30
  -2  -8   3   41.70    2.10
  -2   8  -3   38.40    1.60
   2   8   3   42.30    1.80
   2  -8  -3   40.20    2.30
  -2   8  -3   41.20    2.30
  -2   8  -3   40.50    2.00
   2   8   3   40.40    2.30
   2  -8  -3   45.80    1.80
   2  -8  -3   44.00    2.10
  -3  -8  -3   53.49    2.60
  -3   8   3   47.80    2.50
  -3   8   3   45.90    2.50
  -3   8   3   45.80    2.00
   3  -8   3   47.70    1.40
   3   8  -3   44.20    2.20
  -3  -8  -3   47.30    2.30
   3  -8   3   55.69    4.20
   3   8  -3   49.00    2.30
   3   8  -3   50.79    1.80
  -3  -8  -3   48.00    2.20
   3  -8   3   48.20    1.60
  -3   8   3   48.10    2.00
  -3   8  -3   44.60    2.20
   3   8   3   47.80    2.00
   3  -8  -3   47.90    2.30
   3  -8  -3   49.10    1.90
  -3  -8   3   45.40    2.20
  -3   8  -3   49.99    2.60
  -3   8  -3   48.40    1.80
   3   8   3   50.09    2.50
   4   8  -3   -0.30    0.40
   4   8  -3   -0.30    0.40
   4  -8   3    0.80    0.50
   4   8  -3   -0.40    0.40
  -4  -8  -3   -0.70    0.40
  -4  -8  -3    1.20    0.60
   4  -8   3    0.40    0.30
  -4   8   3    1.60    0.80
  -4  -8  -3   -0.40    0.40
   4  -8   3    0.30    0.20
  -4   8   3    0.20    0.60
  -4   8   3    0.00    0.40
   4   8   3    0.20    0.40
  -4   8  -3    0.50    0.60
   4  -8  -3    0.00    0.50
  -4  -8   3    0.40    0.50
   4  -8  -3    1.00    0.60
  -4   8  -3   -0.40    0.40
   4   8   3    0.90    0.70
   4  -8  -3    0.20    0.40
  -4   8  -3    0.80    0.40
  -5   8   3  243.18    6.60
   5   8  -3  245.48    5.50
   5  -8   3  237.58    5.20
  -5   8   3  234.18    5.80
   5  -8   3  235.18    4.50
   5   8  -3  240.08    5.80
   5   8  -3  230.48    6.20
  -5  -8  -3  236.38    5.90
  -5  -8  -3  236.38    6.10
  -5   8   3  237.08    6.50
  -5  -8  -3  239.18    6.20
  -5   8  -3  242.68    5.40
  -5   8  -3  232.88    6.60
   5  -8  -3  250.17    5.50
   5   8   3  243.08    6.30
  -5  -8   3  241.08    5.80
   5  -8  -3  232.58    6.60
   5   8   3  237.28    5.70
  -5  -8   3  242.68    4.90
  -5   8  -3  245.98    6.30
  -6   8   3   76.89    3.40
  -6   8   3   85.49    3.20
   6   8  -3   85.29    3.10
  -6  -8  -3   77.29    3.20
   6  -8   3   82.79    2.80
   6   8  -3   78.19    2.90
  -6  -8  -3   79.99    3.30
   6  -8   3   78.19    2.80
   6   8   3   80.49    3.40
   6  -8  -3   79.29    3.30
  -6   8  -3   75.99    3.30
  -6  -8   3   78.99    2.50
  -6   8  -3   78.09    2.80
   6  -8  -3   79.79    2.80
  -6  -8   3   80.89    2.90
   6  -8  -3   81.79    4.20
  -7  -8  -3   47.00    2.50
   7  -8   3   47.90    1.90
  -7  -8  -3   50.09    2.60
  -7   8   3   51.69    3.00
  -7   8   3   44.40    4.00
  -7   8   3   43.70    2.90
   7   8  -3   48.20    2.30
   7  -8   3   47.60    2.20
  -7   8  -3   49.30    2.30
  -7   8  -3   49.90    3.00
   7  -8  -3   47.80    2.30
  -7  -8   3   47.00    2.10
  -7  -8   3   44.70    2.00
  -7  -8   3   47.90    2.20
  -8   8   3   26.50    2.20
  -8   8   3   26.10    2.00
   8  -8   3   29.10    1.60
   8  -8   3   25.80    2.00
  -8  -8  -3   27.60    2.40
  -8   8   3   24.30    2.30
  -8   8  -3   29.50    2.30
  -8  -8   3   27.60    1.70
  -8   8  -3   25.90    1.80
  -8  -8   3   25.30    1.60
   8  -8  -3   26.40    1.70
  -8   8  -3   28.80    2.40
  -8  -8   3   26.40    1.70
   9  -8   3    1.80    0.60
  -9   8   3    1.20    1.00
   9  -8   3   -0.50    0.60
  -9   8   3    1.70    0.80
  -9   8   3    0.90    0.80
  -9  -8  -3    0.80    0.70
  -9  -8   3    1.00    0.60
   9  -8  -3    1.90    0.70
  -9   8  -3    1.90    0.70
  -9   8  -3    1.20    1.00
  -9   8  -3    1.00    0.80
  -9  -8   3    1.70    0.70
 -10  -8  -3   41.60    2.70
  10  -8   3   42.90    2.10
 -10   8   3   40.00    2.80
 -10   8   3   43.50    3.10
 -10   8   3   42.90    2.70
 -10   8  -3   38.40    2.90
  10  -8  -3   37.50    2.30
 -10  -8   3   42.40    2.20
 -10  -8   3   40.40    2.20
 -10   8  -3   37.00    2.30
 -10   8  -3   43.20    3.10
 -11  -8  -3    2.30    1.00
 -11   8   3    0.90    0.80
 -11   8   3   -0.20    0.70
 -11   8   3    0.70    1.10
  11  -8   3    0.30    0.80
  11  -8  -3    1.60    0.80
 -11  -8   3    1.40    0.80
 -11   8  -3   -1.00    0.90
 -11   8  -3    0.50    0.60
   0  -9  -3   15.40    1.50
   0   9   3   15.20    1.20
   0  -9  -3   18.00    1.40
   0   9   3   18.10    1.70
   0   9  -3   16.20    0.90
   0   9  -3   16.80    1.60
   0   9  -3   14.20    1.40
   0  -9  -3   16.80    1.30
   1   9  -3  285.27    6.90
  -1   9   3  280.97    7.20
  -1  -9  -3  281.47    6.10
   1  -9   3  284.17    7.20
  -1  -9  -3  285.27    7.10
  -1   9   3  273.07    6.00
  -1   9   3  276.27    7.10
   1   9  -3  299.57    6.00
   1  -9   3  269.37    5.20
  -1  -9  -3  294.07    6.60
   1  -9  -3  270.77    7.00
  -1  -9   3  271.67    6.80
  -1   9  -3  278.07    7.00
  -1   9  -3  280.57    6.50
   1   9   3  277.37    5.90
   1   9   3  284.27    7.00
   1  -9  -3  273.27    5.80
  -1   9  -3  268.47    5.10
   1  -9  -3  284.47    6.50
  -2  -9  -3   65.69    2.70
  -2  -9  -3   68.09    3.00
  -2   9   3   70.59    2.50
  -2   9   3   68.69    3.20
  -2  -9  -3   64.39    2.60
   2   9  -3   69.79    2.10
  -2   9   3   67.79    2.60
  -2   9   3   67.39    3.10
   2  -9   3   66.09    3.10
   2  -9   3   68.19    1.80
   2   9  -3   63.49    2.80
  -2   9  -3   67.99    3.10
  -2   9  -3   66.19    1.90
  -2   9  -3   69.39    2.80
   2  -9  -3   67.29    2.70
   2  -9  -3   70.79    2.40
  -2   9  -3   71.59    2.30
   2   9   3   70.09    3.10
   2   9   3   67.59    2.50
   2  -9  -3   64.89    3.10
  -2  -9   3   69.69    3.00
  -3   9   3    5.00    0.80
  -3  -9  -3    5.00    1.00
  -3  -9  -3    5.20    1.00
   3   9  -3    4.10    0.70
   3   9  -3    5.20    1.00
   3   9  -3    3.40    0.80
   3  -9   3    4.40    0.50
  -3  -9  -3    3.90    0.80
  -3   9   3    4.10    0.80
   3  -9   3    3.50    0.90
  -3   9   3    4.20    1.10
  -3   9   3    4.10    1.10
  -3   9  -3    4.90    1.10
  -3   9  -3    4.00    0.70
   3  -9  -3    5.80    1.00
   3  -9  -3    2.10    0.70
   3  -9  -3    3.90    0.70
   3   9   3    4.30    0.80
  -3   9  -3    5.20    1.00
   3   9   3    4.00    1.00
  -3  -9   3    4.50    0.90
   4  -9   3  101.09    3.10
  -4   9   3  109.49    4.20
   4  -9   3  102.59    2.40
   4   9  -3  102.49    3.60
  -4  -9  -3  103.49    3.90
   4   9  -3  104.09    3.00
   4   9  -3  106.29    3.90
  -4  -9  -3  103.69    3.50
  -4   9   3   96.99    3.40
  -4   9   3  101.49    4.00
  -4  -9  -3  102.49    3.60
  -4  -9   3   96.59    3.50
  -4   9  -3   99.09    3.10
  -4   9  -3  109.49    3.80
   4   9   3  107.09    4.00
   4   9   3  107.39    3.30
   4  -9  -3  107.09    3.10
  -4   9  -3  103.29    4.10
  -5  -9  -3   51.39    2.50
   5  -9   3   50.19    1.60
  -5   9   3   45.80    3.30
  -5   9   3   48.90    2.40
  -5   9   3   53.09    3.10
  -5  -9  -3   50.59    3.30
  -5  -9  -3   49.40    2.60
   5   9  -3   52.89    2.50
   5   9  -3   49.60    2.20
   5  -9   3   49.40    1.90
  -5   9  -3   54.69    2.80
  -5  -9   3   50.39    2.50
   5   9   3   54.39    2.90
   5  -9  -3   54.49    2.20
  -5   9  -3   53.99    2.20
  -5   9  -3   52.69    3.00
   5   9   3   55.89    2.50
   5  -9  -3   51.39    2.60
   6   9  -3  124.79    4.00
   6   9  -3  117.69    3.70
   6  -9   3  125.39    4.10
  -6   9   3  125.59    4.70
  -6  -9  -3  120.49    4.10
  -6   9   3  117.49    4.10
  -6   9   3  120.89    4.70
  -6  -9  -3  121.79    4.30
   6  -9   3  120.49    3.50
  -6  -9   3  121.49    4.00
   6  -9  -3  126.39    3.70
  -6   9  -3  119.69    3.70
   6   9   3  125.69    4.60
  -6   9  -3  127.39    5.00
  -6   9  -3  122.89    5.30
  -7  -9  -3   31.70    2.10
   7  -9   3   32.00    1.80
  -7   9   3   33.20    2.20
   7  -9   3   35.20    1.50
  -7   9   3   32.40    2.50
  -7   9   3   33.10    2.60
   7   9  -3   31.40    2.00
  -7   9  -3   34.90    2.40
   7   9   3   33.60    2.40
  -7  -9   3   32.00    2.00
  -7   9  -3   30.50    1.90
  -7   9  -3   32.00    2.50
  -7  -9   3   32.80    1.70
   7  -9  -3   33.40    1.90
  -8   9   3   10.00    1.80
   8  -9   3    9.80    1.30
  -8   9   3   10.90    1.50
  -8  -9  -3   10.50    1.50
  -8   9   3   10.20    1.80
   8  -9   3   10.30    1.00
  -8   9  -3   12.40    1.30
  -8   9  -3   11.80    1.70
   8  -9  -3   13.20    1.40
  -8   9  -3   11.60    1.70
  -8  -9   3   11.90    1.10
  -8  -9   3   12.80    1.30
  -9   9   3   36.90    2.60
  -9   9   3   33.70    2.70
  -9  -9  -3   34.80    2.50
   9  -9   3   35.10    1.80
  -9   9   3   34.40    2.70
   9  -9  -3   33.80    2.10
  -9  -9   3   35.80    1.90
  -9  -9   3   33.60    1.90
  -9   9  -3   32.60    2.80
  -9  -9   3   32.90    2.10
  -9   9  -3   36.50    2.20
  -9   9  -3   34.40    2.60
 -10   9   3   26.90    2.30
 -10  -9  -3   30.10    2.40
 -10   9   3   30.60    2.60
 -10   9   3   29.80    2.70
  10  -9   3   28.90    1.80
  10  -9  -3   26.00    2.00
 -10  -9   3   27.40    2.00
 -10   9  -3   28.00    4.40
 -10   9  -3   27.50    2.10
 -10  -9   3   30.60    1.80
   0  10  -3   -0.20    0.60
   0 -10  -3   -0.30    0.40
   0  10   3   -0.30    0.30
   0 -10   3   -0.30    0.50
   0  10   3    0.30    0.70
   0 -10  -3    0.30    0.50
   0  10  -3    1.10    0.60
   1  10  -3   92.39    3.70
   1  10  -3   90.79    2.50
  -1  10   3   88.69    3.00
   1 -10   3   93.89    2.50
  -1  10   3   96.39    3.20
  -1  10   3   88.69    3.80
  -1 -10  -3   95.89    3.30
  -1  10   3   98.29    4.90
  -1 -10  -3   92.69    3.10
  -1 -10   3   93.09    3.70
   1 -10  -3   93.09    3.00
   1  10   3   94.09    3.90
   1  10   3   96.99    3.10
  -1  10  -3   91.39    2.40
   1 -10  -3   93.89    3.40
  -1  10  -3   99.59    3.90
  -1  10  -3   94.19    3.50
  -2 -10  -3   84.29    3.10
   2  10  -3   83.39    2.50
   2  10  -3   79.99    3.40
  -2 -10  -3   80.79    3.10
  -2  10   3   79.69    3.70
  -2  10   3   78.19    3.60
  -2  10   3   81.49    2.90
  -2  10   3   78.49    2.90
   2 -10   3   84.69    2.20
   2 -10  -3   85.69    2.70
   2  10   3   79.19    3.50
  -2  10  -3   81.29    4.40
  -2  10  -3   87.79    3.40
  -2  10  -3   76.79    2.70
  -2  10  -3   78.89    2.20
   2  10   3   82.59    3.30
   2 -10  -3   80.59    3.10
  -2 -10   3   80.09    3.40
  -3  10   3    2.40    0.70
  -3 -10  -3    4.20    0.90
   3  10  -3    1.70    0.80
   3  10  -3    3.20    0.60
  -3  10   3    2.60    1.40
   3  10  -3    2.50    0.70
   3 -10   3    3.70    0.50
  -3 -10  -3    2.40    0.80
  -3 -10  -3    4.00    1.00
  -3  10   3    2.30    0.80
  -3  10   3    4.50    1.20
  -3  10  -3    3.40    0.70
  -3  10  -3    3.00    1.00
  -3  10  -3    2.50    0.90
   3 -10  -3    3.40    0.70
   3  10   3    2.20    1.10
  -3 -10   3    2.10    0.70
   3  10   3    2.80    0.60
   4  10  -3   57.59    2.80
  -4 -10  -3   58.39    2.60
  -4  10   3   58.49    2.70
  -4 -10  -3   57.79    3.20
   4 -10   3   62.49    1.80
   4  10  -3   60.79    2.30
  -4  10   3   58.59    3.20
  -4  10   3   63.49    3.30
  -4 -10   3   59.39    2.80
   4  10   3   60.99    3.50
   4 -10  -3   62.69    2.30
   4 -10  -3   61.49    2.70
   4  10   3   60.89    3.00
  -4  10  -3   61.39    3.00
  -4  10  -3   56.39    2.40
  -4  10  -3   58.49    3.20
  -5 -10  -3   14.10    1.40
   5  10  -3   13.90    1.70
   5 -10   3   12.40    1.10
  -5  10   3   14.90    1.90
  -5  10   3   14.00    1.90
  -5  10   3   14.10    1.40
  -5 -10  -3   14.10    1.70
   5  10  -3   12.20    1.20
   5 -10   3   13.60    0.80
  -5  10  -3   12.80    1.80
   5 -10  -3   13.30    1.20
   5 -10  -3   14.10    1.70
  -5 -10   3   13.50    1.60
  -5  10  -3   11.50    1.20
   5  10   3   20.40    1.90
  -6  10   3   12.90    1.80
   6 -10   3   14.80    1.30
  -6  10   3   16.60    2.20
  -6 -10  -3   14.20    1.70
  -6 -10  -3   16.10    1.50
   6 -10   3   15.70    1.00
   6  10  -3   13.70    1.50
  -6  10   3   17.30    1.60
  -6  10  -3   14.70    2.10
   6  10   3   12.70    1.80
  -6  10  -3   17.50    1.80
  -6 -10   3   12.00    1.60
   6 -10  -3   15.00    1.30
  -6  10  -3   13.00    1.30
   7  10  -3   90.79    3.60
  -7  10   3   90.59    4.30
   7 -10   3   86.39    3.00
   7 -10   3   90.29    2.50
  -7  10   3   90.19    3.80
  -7  10   3   88.29    4.20
  -7 -10   3   88.29    3.50
  -7  10  -3   86.79    4.00
  -7  10  -3   91.89    4.40
   7  10   3   98.09    4.20
  -7  10  -3   86.89    3.30
   7 -10  -3   85.39    3.10
  -8 -10  -3   17.70    1.80
   8 -10   3   17.80    1.20
   8 -10   3   17.50    1.60
  -8  10   3   19.20    2.50
  -8  10   3   15.40    2.30
  -8  10   3   16.50    2.00
  -8  10  -3   14.70    1.40
  -8  10  -3   17.30    2.20
   8 -10  -3   17.30    1.50
  -8 -10   3   15.40    1.80
  -8  10  -3   19.70    2.20
  -9  10   3   27.30    2.30
   9 -10   3   26.40    1.50
  -9 -10  -3   31.80    2.30
  -9  10   3   27.60    2.60
  -9  10   3   28.30    2.60
  -9  10  -3   24.40    3.20
   9 -10  -3   31.50    2.00
  -9  10  -3   31.00    2.70
  -9  10  -3   25.00    1.90
   0  11  -3   18.60    1.10
   0  11   3   21.50    2.00
   0 -11  -3   20.60    1.50
   0  11  -3   21.60    1.90
   0  11   3   21.80    1.50
   0 -11  -3   22.60    1.90
  -1  11   3   48.00    2.30
   1  11  -3   44.70    2.70
  -1 -11  -3   46.20    2.70
  -1  11   3   42.30    2.80
   1  11  -3   49.99    1.90
  -1 -11  -3   50.29    2.30
  -1  11  -3   46.00    2.60
  -1  11  -3   44.90    2.70
   1 -11  -3   52.79    2.20
   1  11   3   44.20    2.80
   1  11   3   42.40    2.10
  -2  11   3   12.00    1.60
   2  11  -3   17.30    2.30
  -2  11   3   14.90    2.00
  -2  11   3   10.80    1.30
  -2  11   3   14.40    1.90
   2  11  -3   13.00    1.00
   2 -11   3   13.20    0.90
  -2 -11  -3   12.30    1.40
  -2  11  -3   13.60    1.20
   2  11   3   14.00    1.80
   2  11   3   13.00    1.30
   2 -11  -3   13.60    1.60
   2 -11  -3   15.00    1.20
  -2  11  -3   15.10    1.90
  -2  11  -3   14.20    2.00
  -3 -11  -3   11.40    1.40
  -3 -11  -3   12.50    1.30
  -3  11   3   12.80    1.40
  -3  11   3   15.60    2.00
  -3  11   3   14.30    1.90
   3 -11   3   13.70    0.90
   3  11  -3   11.20    1.00
  -3 -11  -3   12.40    1.30
   3 -11  -3   13.90    1.40
  -3  11  -3   13.20    1.80
   3  11   3   13.60    1.80
  -3  11  -3   12.00    1.90
  -3  11  -3   13.70    1.20
   3 -11  -3   13.10    1.20
  -4  11   3   21.70    2.20
  -4  11   3   24.30    1.80
   4  11  -3   24.30    1.50
  -4  11   3   20.70    2.10
  -4 -11  -3   22.80    1.80
   4 -11   3   23.00    1.10
  -4 -11  -3   22.90    1.80
  -4  11  -3   21.50    2.10
  -4  11  -3   21.50    2.00
   4  11   3   25.50    2.20
   4 -11  -3   24.70    1.50
   4 -11  -3   23.40    1.80
  -4  11  -3   23.90    1.60
   5 -11   3   84.79    2.20
  -5  11   3   89.29    4.20
  -5 -11  -3   89.59    3.40
   5  11  -3   85.79    3.60
  -5  11   3   87.99    3.60
  -5 -11  -3   85.79    3.50
  -5  11   3   85.99    4.10
  -5  11  -3   86.99    4.20
   5  11   3   93.89    4.10
  -5  11  -3   89.99    3.30
   5 -11  -3   90.39    3.00
  -5  11  -3   79.59    3.70
  -6  11   3   51.39    3.30
   6  11  -3   54.49    3.00
  -6 -11  -3   57.79    2.80
   6 -11   3   62.19    2.00
   6 -11   3   54.69    2.10
  -6  11   3   50.59    3.30
  -6  11   3   59.09    3.00
  -6  11  -3   60.69    3.20
   6  11   3   52.79    3.20
   6 -11  -3   53.89    2.40
  -6  11  -3   54.39    3.10
  -6  11  -3   59.69    3.50
   7 -11   3   23.80    1.60
   7  11  -3   28.10    2.10
  -7 -11  -3   23.60    2.00
  -7  11   3   22.10    2.30
   7 -11   3   25.40    1.30
  -7  11   3   23.70    2.00
  -7  11   3   24.10    2.40
  -7  11  -3   25.20    2.40
  -7  11  -3   27.00    2.30
   7  11   3   27.30    2.40
   7 -11  -3   24.00    1.70
  -7  11  -3   23.90    1.80
  -8  11   3   41.50    2.70
   8 -11   3   38.80    1.70
   8  11  -3   42.90    2.60
  -8  11   3   43.70    4.50
  -8  11   3   37.70    3.00
  -8 -11  -3   35.30    2.40
  -8  11  -3   33.60    3.00
  -8  11  -3   36.00    2.80
  -8  11  -3   43.70    2.40
   8 -11  -3   35.50    2.10
   0  12  -3   51.39    1.90
   0  12   3   56.69    3.30
   0 -12  -3   54.99    2.60
   0 -12  -3   51.49    2.40
   0  12   3   50.69    2.40
   0  12  -3   52.49    3.10
  -1  12   3    1.80    0.60
   1  12  -3    0.70    0.40
  -1 -12  -3    0.30    0.50
  -1 -12  -3   -0.30    0.60
   1  12  -3    0.80    0.70
  -1  12   3    0.60    0.60
  -1  12   3    0.80    0.80
  -1  12  -3    0.60    0.70
  -1  12  -3    1.00    0.60
  -1  12  -3    0.10    0.80
   1  12   3    2.20    0.90
   1 -12  -3    0.70    0.50
  -1  12  -3    1.20    0.40
   1 -12  -3    1.50    0.70
  -2  12   3   55.39    2.50
   2  12  -3   55.89    3.10
  -2 -12  -3   57.69    2.70
  -2 -12  -3   55.59    2.60
  -2  12   3   57.59    3.30
   2  12  -3   54.39    2.10
  -2  12   3   58.39    2.70
  -2  12  -3   55.39    3.00
  -2  12  -3   58.19    2.40
   2  12   3   57.99    3.20
  -2  12  -3   54.49    3.20
   2 -12  -3   50.89    2.60
   2 -12  -3   58.19    2.40
  -3  12   3   10.30    1.40
   3  12  -3   10.60    1.60
  -3  12   3    8.20    1.20
  -3 -12  -3   10.30    1.40
   3 -12   3   10.90    0.90
  -3  12   3   10.10    1.70
  -3  12   3   10.60    2.00
  -3 -12  -3    9.60    1.40
   3 -12  -3   11.10    1.20
  -3  12  -3   12.80    1.90
   3  12   3    9.40    1.60
  -3  12  -3   11.60    1.40
  -3  12  -3   11.80    1.90
   4  12  -3   43.90    2.10
   4  12  -3   41.00    2.70
  -4 -12  -3   47.20    2.40
  -4  12   3   40.00    3.00
  -4  12   3   41.20    3.00
   4 -12   3   42.20    1.50
  -4 -12  -3   42.20    2.30
  -4  12   3   40.70    2.50
  -4  12  -3   46.80    2.30
   4 -12  -3   45.80    2.10
  -4  12  -3   47.90    2.90
   4  12   3   43.20    3.00
  -4  12  -3   47.10    3.10
  -5  12   3   46.00    2.60
   5  12  -3   43.00    2.70
  -5  12   3   40.10    3.00
  -5  12   3   37.10    2.90
  -5 -12  -3   39.10    2.30
  -5  12  -3   40.30    2.20
  -5  12  -3   38.50    2.70
   5  12   3   38.30    2.80
  -5  12  -3   40.30    3.00
   5 -12  -3   39.80    2.00
  -6  12   3   89.99    3.90
  -6  12   3   94.99    6.40
  -6  12   3   83.29    5.30
   6  12  -3   79.19    3.70
  -6 -12  -3   90.89    4.50
  -6  12  -3   84.49    4.10
   6 -12  -3   77.59    3.00
   6  12   3   85.19    4.20
  -6  12  -3   88.49    4.90
  -6  12  -3   82.89    3.30
   0 -13  -3   35.90    2.10
   0  13   3   37.10    2.30
   0  13   3   34.70    2.70
   0  13  -3   31.80    2.60
   0  13  -3   31.00    1.60
   0 -13  -3   35.40    2.20
  -1  13   3   67.69    3.10
   1  13  -3   58.79    3.40
  -1 -13  -3   70.49    3.00
  -1  13   3   66.49    3.80
  -1 -13  -3   65.39    2.90
   1  13  -3   67.69    2.40
   1 -13  -3   63.39    3.10
  -1  13  -3   69.49    3.80
  -1  13  -3   61.99    2.20
  -1  13  -3   71.79    2.90
   1  13   3   67.79    3.80
   1 -13  -3   65.89    2.90
  -2 -13  -3   37.80    2.10
  -2 -13  -3   35.90    2.20
  -2 -13  -3   38.20    2.30
  -2  13   3   37.80    2.30
   2  13  -3   40.10    2.80
  -2  13   3   38.80    2.90
   2  13  -3   33.40    1.80
  -2  13  -3   43.30    3.00
  -2  13  -3   38.80    2.90
   2 -13  -3   39.10    2.10
   2  13   3   42.50    3.00
  -2  13  -3   38.10    2.10
  -3  13   3   46.60    2.60
  -3 -13  -3   48.60    2.60
  -3 -13  -3   45.60    2.40
  -3  13   3   57.69    4.40
  -3  13   3   50.89    3.30
   3  13  -3   43.00    2.90
   3  13  -3   47.30    2.20
  -3  13  -3   48.70    2.40
  -3  13  -3   47.50    3.20
   3 -13  -3   47.60    2.40
   3  13   3   50.59    3.30
  -3  13  -3   49.90    3.20
  -4  13   3   92.09    4.60
  -4  13   3   97.79    5.80
  -4  13   3   87.19    3.80
  -4 -13  -3   88.59    3.40
   4  13  -3   89.19    4.10
  -4  13  -3   82.99    4.10
  -4  13  -3   86.99    4.40
  -4  13  -3   90.69    3.40
   4  13   3   85.29    4.30
   4 -13  -3   90.59    3.70
   5  13  -3   35.00    2.60
  -5 -13  -3   33.50    2.80
  -5  13   3   32.40    2.90
  -5  13   3   38.10    3.10
  -5  13   3   35.40    2.50
   5 -13  -3   35.70    2.00
  -5  13  -3   34.90    2.80
  -5  13  -3   33.50    2.10
   5  13   3   32.10    2.80
  -5  13  -3   31.10    2.80
   0 -14  -3    4.20    1.10
   0  14   3    2.80    1.10
   0  14   3    4.90    1.10
   0  14  -3    3.20    1.10
   0  14  -3    2.70    0.80
   0   0   4  446.66    6.90
   0   0  -4  434.06    6.60
   0   0   4  438.26    6.70
   0   0  -4  435.96    6.90
   1   0  -4 1130.89   16.70
   1   0  -4 1128.59   16.90
  -2   0  -4   11.50    0.60
  -2   0   4   10.30    0.60
   2   0   4   10.60    0.60
   2   0   4   11.60    0.50
   2   0  -4   11.80    0.70
  -2   0   4   11.30    0.60
   2   0  -4   12.30    0.60
   3   0  -4    1.60    0.40
   3   0   4    0.70    0.30
  -3   0  -4    1.20    0.30
   3   0   4    0.80    0.20
   3   0  -4    1.10    0.30
  -3   0   4    1.10    0.40
  -3   0   4    0.60    0.30
   4   0  -4 1135.09   18.50
  -4   0   4 1191.58   17.60
  -4   0   4 1183.68   18.60
  -4   0  -4 1160.18   18.60
   4   0   4 1189.68   18.30
   4   0  -4 1192.58   18.70
   4   0   4 1189.48   18.20
  -4   0  -4 1200.08   18.20
   5   0  -4    3.50    0.70
  -5   0   4    3.30    0.60
  -5   0   4    3.90    0.40
  -5   0  -4    4.20    0.80
  -5   0   4    3.10    0.60
  -5   0  -4    3.40    0.60
   5   0  -4    2.80    0.50
   5   0   4    3.00    0.50
   5   0   4    2.90    0.50
   6   0   4  131.79    3.50
  -6   0   4  128.59    3.60
  -6   0  -4  126.99    3.70
   6   0   4  131.69    3.40
  -6   0   4  128.59    2.90
   6   0  -4  131.19    3.70
  -6   0   4  127.69    3.60
   6   0  -4  123.69    3.50
  -7   0   4   66.09    2.00
  -7   0   4   68.19    2.70
  -7   0   4   64.59    2.60
  -7   0  -4   62.59    2.60
   7   0   4   68.29    2.50
   7   0   4   66.39    2.40
  -7   0  -4   64.19    2.40
   7   0  -4   65.49    2.60
   7   0   4   64.49    2.50
  -8   0  -4   70.39    3.00
  -8   0   4   70.39    2.90
   8   0  -4   67.79    2.70
  -8   0   4   68.59    2.20
   8   0   4   64.79    2.70
   8   0   4   72.79    2.70
   8   0   4   68.59    2.60
  -8   0  -4   74.69    2.70
  -8   0   4   74.59    3.00
   8   0  -4   67.39    2.80
   9   0   4   32.60    1.90
  -9   0   4   32.30    1.60
  -9   0   4   31.80    2.10
   9   0   4   31.70    1.90
   9   0  -4   31.50    1.90
  -9   0  -4   31.20    2.10
  -9   0   4   31.50    2.10
   9   0  -4   32.80    2.10
  -9   0  -4   33.40    2.00
 -10   0  -4   76.39    3.20
 -10   0   4   78.19    2.70
 -10   0  -4   76.89    3.50
 -10   0   4   76.99    3.50
 -10   0   4   80.99    3.50
  10   0   4   76.99    3.10
 -11   0  -4  213.38    6.60
 -11   0   4  208.28    6.30
 -11   0  -4  215.48    6.00
 -11   0   4  207.98    5.10
 -11   0   4  222.68    6.50
 -12   0   4   49.50    2.20
 -12   0  -4   54.09    3.30
 -12   0   4   50.89    2.30
 -12   0   4   52.09    3.10
 -12   0   4   53.19    3.10
 -13   0   4   -0.30    0.60
 -13   0  -4    0.80    0.90
 -13   0   4    0.40    0.60
 -13   0   4    1.00    1.00
 -13   0   4   -0.70    0.70
   0  -1  -4 2125.79   59.19
   0  -1   4 2085.09   41.40
   0  -1   4 2143.69   40.10
   1  -1   4 2429.66   70.49
   1   1  -4 2439.06   54.09
  -1  -1   4 2437.96   57.19
   1  -1  -4 2546.65   68.69
  -1   1  -4 2431.46   60.69
   1   1   4 2529.85   73.29
  -2   1   4  554.84    9.30
  -2   1   4  570.84    8.90
  -2  -1  -4  578.54    9.20
  -2   1   4  558.34    9.20
   2  -1   4  582.64    8.80
   2  -1   4  576.34    8.60
   2   1  -4  577.54    9.00
   2   1  -4  573.94    9.20
  -2  -1  -4  585.54    9.50
  -2   1  -4  580.24    9.00
   2  -1  -4  568.24    9.20
   2  -1  -4  590.44    9.00
  -2  -1   4  569.14    8.80
  -2   1  -4  571.54    8.60
  -2  -1   4  548.15    9.20
   2   1   4  573.84    9.10
   2  -1  -4  585.44    9.40
   3  -1   4  562.64    8.80
  -3   1   4  549.25    9.40
  -3  -1  -4  562.94    9.40
  -3   1   4  572.24    9.50
  -3  -1  -4  563.04    9.40
   3   1  -4  554.24    9.40
  -3   1   4  563.54    8.90
   3  -1   4  561.54    9.00
   3   1  -4  573.94    9.20
  -3  -1   4  557.04    9.00
  -3   1  -4  563.04    8.80
   3  -1  -4  567.84    8.90
  -3  -1   4  551.74    9.30
   3  -1  -4  554.64    9.40
   3  -1  -4  552.04    9.40
   3   1   4  556.84    9.20
   3   1   4  553.04    9.10
  -3   1  -4  568.04    9.20
   4  -1   4  378.96    6.30
   4   1  -4  356.76    6.80
  -4   1   4  365.06    6.30
   4   1  -4  369.26    6.80
   4  -1   4  374.26    6.50
  -4   1   4  361.16    6.90
   4  -1   4  378.16    6.60
  -4   1   4  372.96    6.90
  -4  -1  -4  367.46    6.90
  -4   1  -4  376.56    6.90
   4   1   4  367.76    6.70
   4  -1  -4  372.46    6.80
  -4   1  -4  370.96    6.40
   4   1   4  377.86    6.70
  -4  -1   4  362.66    6.60
  -4  -1   4  370.56    6.90
   4  -1  -4  365.36    7.00
   5   1  -4  342.77    7.30
  -5   1   4  320.37    6.70
   5   1  -4  346.47    6.70
  -5  -1  -4  336.27    6.80
  -5   1   4  333.77    6.70
   5  -1   4  332.47    6.10
  -5   1   4  337.67    6.00
  -5   1  -4  334.37    7.30
  -5  -1   4  332.57    5.40
  -5   1  -4  325.27    6.10
  -5  -1   4  329.57    6.40
   5  -1  -4  329.17    6.70
   5   1   4  334.47    6.30
   5   1   4  330.27    6.40
   5  -1  -4  332.67    6.40
   6  -1   4   16.40    1.20
  -6  -1  -4   17.80    1.30
  -6   1   4   17.90    1.30
   6  -1   4   17.20    1.00
   6   1  -4   17.50    1.20
  -6   1   4   16.10    1.20
  -6   1   4   18.00    1.00
  -6  -1   4   15.60    1.20
   6   1   4   16.30    1.10
  -6   1  -4   16.30    1.00
   6  -1  -4   16.90    1.30
  -6   1  -4   19.30    1.30
   6  -1  -4   16.60    1.10
   6   1   4   15.90    1.10
  -6  -1   4   16.80    0.80
   7  -1   4  203.78    4.90
  -7   1   4  200.18    4.30
   7   1  -4  194.58    5.00
  -7   1   4  187.48    5.00
  -7   1   4  192.48    5.10
  -7  -1  -4  195.38    5.10
   7  -1   4  197.38    4.50
   7   1  -4  204.38    5.10
  -7  -1   4  197.98    5.10
   7  -1  -4  196.28    5.10
  -7  -1   4  191.38    4.90
  -7  -1   4  188.28    4.00
  -7   1  -4  195.18    4.60
  -7   1  -4  194.58    5.10
   7   1   4  201.88    4.80
   7   1   4  195.48    4.80
   7  -1  -4  192.58    4.80
  -7  -1   4  199.78    4.00
  -8   1   4   15.50    1.10
  -8  -1  -4   14.30    1.40
   8  -1   4   15.10    1.40
  -8   1   4   17.10    1.40
   8   1  -4   15.00    1.40
  -8   1   4   19.20    1.60
   8  -1   4   18.60    1.30
  -8  -1   4   12.70    0.90
  -8   1  -4   14.60    1.50
  -8  -1   4   12.70    1.30
  -8  -1   4   14.70    1.40
   8   1   4   13.90    1.30
  -8  -1   4   14.20    0.90
  -8   1  -4   13.40    1.20
   8  -1  -4   15.80    1.30
   8   1   4   13.80    1.20
  -9   1   4   25.80    1.90
   9   1  -4   22.40    1.80
   9  -1   4   22.80    1.50
  -9   1   4   23.90    1.50
   9   1  -4   23.20    1.70
  -9  -1  -4   22.10    1.80
  -9   1   4   20.80    1.80
   9  -1   4   20.80    1.60
  -9  -1   4   21.10    1.70
   9   1   4   20.90    1.60
  -9   1  -4   23.40    1.60
   9  -1  -4   22.00    1.80
   9  -1  -4   22.10    1.60
  -9  -1   4   23.30    1.70
  -9  -1   4   23.00    1.30
   9   1   4   22.70    1.60
  -9   1  -4   26.10    2.00
  -9  -1   4   23.00    1.30
  10  -1   4  146.89    4.30
 -10   1   4  139.89    5.00
 -10  -1  -4  142.69    4.60
 -10   1   4  140.59    4.80
 -10   1   4  149.88    4.10
 -10  -1  -4  142.79    5.00
 -10  -1   4  146.89    4.10
 -10   1  -4  144.99    5.10
  10   1   4  148.09    4.60
 -10  -1   4  141.49    3.70
 -10   1  -4  146.29    4.50
 -10  -1   4  142.39    4.80
 -10  -1   4  151.98    5.00
 -11   1   4    4.00    1.00
 -11   1   4    4.60    0.90
 -11  -1  -4    4.50    1.20
 -11   1   4    3.40    1.10
 -11  -1   4    4.70    1.20
 -11   1  -4    2.90    0.90
 -11  -1   4    2.50    0.70
 -11   1  -4    3.50    0.90
 -11  -1   4    3.50    1.10
 -11  -1   4    3.20    0.70
 -12   1   4   55.19    2.50
 -12   1   4   49.30    3.00
 -12   1   4   50.09    3.10
 -12  -1  -4   52.29    3.20
 -12  -1   4   51.69    2.20
 -12  -1   4   56.89    3.20
 -12  -1   4   52.49    3.00
 -12   1  -4   53.69    2.90
 -12   1  -4   53.79    3.20
 -12  -1   4   48.20    2.10
 -12   1  -4   52.39    3.30
 -13  -1  -4    5.90    1.50
 -13   1   4    4.90    1.20
 -13   1   4    3.70    1.30
 -13   1   4    4.20    1.00
 -13  -1   4    6.70    1.50
 -13   1  -4    7.80    1.50
 -13   1  -4    6.80    1.50
 -13  -1   4    3.90    0.90
 -13   1  -4    5.60    1.20
 -13  -1   4    5.40    1.00
 -13  -1   4    4.90    1.30
   0   2   4  214.58    4.10
   0   2  -4  217.78    4.00
   0   2  -4  216.48    3.50
   0   2  -4  218.48    3.40
   0  -2  -4  213.58    4.10
   0  -2  -4  218.78    3.90
   0   2   4  210.58    3.90
  -1   2   4    3.90    0.40
   1   2  -4    4.10    0.40
  -1   2   4    5.00    0.60
  -1  -2  -4    3.20    0.50
  -1  -2  -4    5.10    0.40
   1   2  -4    4.00    0.30
   1   2   4    3.40    0.50
   1  -2  -4    3.90    0.40
   1  -2  -4    5.90    0.50
   1  -2  -4    4.20    0.40
   1   2   4    3.50    0.40
  -1  -2   4    3.60    0.40
   1  -2  -4    3.40    0.50
   2   2  -4   48.70    1.20
   2   2  -4   51.49    1.50
  -2  -2  -4   46.50    1.50
  -2  -2  -4   45.90    1.60
  -2   2   4   49.00    1.40
  -2   2   4   46.00    1.50
   2  -2   4   47.80    0.90
   2   2  -4   48.10    1.10
  -2   2   4   49.40    1.70
   2  -2   4   49.00    1.10
   2   2   4   49.90    1.70
  -2  -2   4   45.90    1.50
  -2  -2   4   48.30    1.10
  -2   2  -4   48.10    1.00
  -2   2  -4   48.50    1.30
   2   2   4   51.09    1.50
   2  -2  -4   47.60    1.50
   2  -2  -4   52.29    1.40
   2  -2  -4   46.80    1.60
   3   2  -4  401.16    6.80
  -3  -2  -4  396.66    7.10
   3  -2   4  395.56    6.30
  -3   2   4  381.86    7.20
  -3  -2  -4  382.16    7.20
   3   2  -4  412.16    7.10
  -3   2   4  401.26    7.10
  -3   2   4  396.46    6.80
   3  -2  -4  392.26    7.10
   3  -2  -4  408.36    7.00
  -3  -2   4  406.26    6.60
  -3   2  -4  413.96    7.00
   3  -2  -4  409.26    7.00
   3   2   4  399.26    7.00
  -3  -2   4  395.56    7.20
   3  -2  -4  395.36    7.30
  -3   2  -4  410.16    6.50
  -4  -2  -4  609.04   10.80
   4   2  -4  627.14   10.70
  -4   2   4  632.94   10.30
   4   2  -4  622.64   10.40
  -4  -2  -4  606.84   10.70
  -4   2   4  632.24   10.70
   4  -2   4  630.14   10.30
   4  -2   4  623.34    9.90
  -4   2   4  619.64   10.80
   4  -2  -4  621.14   10.30
   4  -2  -4  607.24   10.60
  -4   2  -4  612.64    9.90
   4   2   4  637.24   10.50
  -4   2  -4  618.24   10.50
   4  -2  -4  612.64   10.40
   4   2   4  616.74   11.00
  -4  -2   4  613.04   10.10
   5   2  -4  125.79    3.40
  -5   2   4  118.39    3.30
   5  -2   4  117.99    3.10
  -5   2   4  121.39    3.00
  -5  -2  -4  118.99    3.40
  -5  -2  -4  122.89    3.40
  -5   2   4  118.29    3.40
   5  -2   4  121.89    2.80
  -5  -2   4  116.19    2.30
   5   2   4  118.79    3.10
  -5  -2   4  114.99    3.00
  -5   2  -4  118.19    2.80
   5  -2  -4  120.89    3.40
   5  -2  -4  120.69    3.10
  -5  -2   4  118.29    3.30
  -5   2  -4  114.99    3.30
   5   2   4  115.99    3.50
  -6   2   4   71.29    2.80
  -6   2   4   73.99    2.30
  -6  -2  -4   78.79    2.70
   6  -2   4   78.89    2.60
   6  -2   4   81.19    2.30
  -6  -2  -4   77.69    2.80
   6   2  -4   75.89    2.60
  -6   2   4   78.79    2.70
   6  -2  -4   80.59    2.90
  -6  -2   4   78.69    2.60
  -6  -2   4   81.39    2.80
   6   2   4   82.69    2.70
  -6   2  -4   75.89    2.40
   6   2   4   83.09    2.70
   6  -2  -4   76.29    2.50
  -6   2  -4   76.99    2.80
  -6  -2   4   78.19    1.90
  -7  -2  -4  200.88    5.20
   7  -2   4  190.08    4.70
   7  -2   4  194.68    4.40
  -7  -2  -4  198.58    5.00
  -7   2   4  188.38    4.40
   7   2  -4  192.28    4.90
  -7   2   4  188.68    5.10
  -7   2   4  198.98    5.10
   7   2  -4  185.08    4.90
   7  -2  -4  192.18    5.10
  -7  -2   4  194.18    5.00
   7   2   4  190.18    4.80
   7   2   4  189.88    4.80
  -7   2  -4  181.28    5.00
  -7   2  -4  184.68    4.40
  -7  -2   4  186.68    4.70
   7  -2  -4  189.88    4.70
  -7  -2   4  191.28    3.80
  -8   2   4   47.00    2.50
  -8   2   4   43.40    1.90
   8  -2   4   44.40    2.20
   8   2  -4   39.60    2.40
   8  -2   4   44.80    1.90
  -8  -2  -4   44.50    2.20
  -8   2   4   45.30    2.40
  -8  -2  -4   45.80    2.40
   8  -2  -4   42.50    2.10
   8  -2  -4   44.60    2.40
   8   2   4   40.20    2.10
  -8  -2   4   45.30    1.60
  -8  -2   4   38.70    2.20
  -8  -2   4   42.20    2.20
  -8   2  -4   43.30    2.40
  -8   2  -4   41.00    1.90
  -9   2   4   62.99    2.90
  -9  -2  -4   64.69    2.80
   9  -2   4   63.69    2.50
  -9   2   4   66.59    2.50
   9  -2   4   59.89    2.70
  -9  -2  -4   61.39    3.00
   9   2  -4   64.29    3.00
  -9   2   4   64.89    3.10
   9   2  -4   63.39    2.90
   9  -2  -4   60.89    2.60
  -9  -2   4   65.49    2.10
  -9  -2   4   62.59    2.80
   9   2   4   61.59    2.70
  -9   2  -4   59.69    3.00
  -9  -2   4   65.59    3.00
   9   2   4   64.89    2.80
  -9   2  -4   64.69    2.70
 -10   2   4   42.30    2.10
 -10   2   4   48.60    2.80
 -10   2   4   44.20    2.60
 -10  -2  -4   46.40    2.50
 -10  -2  -4   40.40    2.60
  10  -2   4   42.00    2.10
 -10  -2   4   43.40    1.80
 -10  -2   4   45.80    2.70
 -10   2  -4   46.50    2.70
 -10   2  -4   44.10    2.30
 -10   2  -4   43.90    2.70
 -10  -2   4   45.60    2.60
 -11   2   4   98.49    4.30
 -11   2   4   99.89    3.40
 -11  -2  -4   96.49    4.20
 -11   2   4   99.19    4.10
 -11   2  -4   96.29    4.20
 -11  -2   4   96.19    3.00
 -11  -2   4   98.29    4.00
 -11   2  -4   99.69    4.20
 -11  -2   4   95.09    2.90
 -11  -2   4   98.09    4.10
 -12   2   4   78.69    3.80
 -12   2   4   81.09    3.20
 -12   2   4   87.29    4.20
 -12  -2  -4   85.29    4.20
 -12   2  -4   79.99    3.50
 -12  -2   4   83.49    3.80
 -12   2  -4   87.99    4.20
 -12  -2   4   78.29    2.70
 -12   2  -4   83.99    4.00
 -12  -2   4   79.99    3.90
 -12  -2   4   81.79    2.80
 -13  -2  -4    5.90    1.50
 -13   2   4    8.10    1.20
 -13   2   4    6.20    1.60
 -13   2   4    6.60    1.40
 -13  -2   4    8.70    1.10
 -13  -2   4    6.60    1.50
 -13  -2   4   10.40    1.80
 -13   2  -4    7.40    1.50
 -13  -2   4    8.30    1.60
 -13   2  -4    6.80    1.50
 -13   2  -4    7.80    1.40
   0  -3  -4  860.41   13.70
   0  -3  -4  846.52   13.80
   0  -3  -4  854.71   13.30
   0  -3   4  850.81   13.60
   0   3   4  850.81   13.40
   0   3  -4  857.21   13.50
   1   3  -4  386.46    6.40
  -1   3   4  374.06    6.90
  -1  -3  -4  373.56    6.80
  -1   3   4  372.76    6.60
  -1   3   4  395.96    6.50
  -1   3   4  371.46    6.70
  -1  -3  -4  381.16    6.50
   1   3  -4  384.36    6.50
  -1  -3   4  397.36    6.60
   1  -3  -4  390.96    6.90
   1   3   4  386.06    6.60
  -1   3  -4  400.26    7.10
   1   3   4  393.36    7.00
   1  -3  -4  378.56    6.70
   1  -3  -4  376.66    7.00
  -2  -3  -4   53.29    1.70
  -2   3   4   49.40    1.60
   2   3  -4   52.29    1.30
   2   3  -4   51.69    1.40
  -2  -3  -4   50.29    1.80
   2   3  -4   49.20    1.60
  -2   3   4   49.20    1.70
  -2  -3   4   51.09    1.40
   2  -3  -4   48.40    1.80
   2   3   4   51.69    1.60
  -2   3  -4   52.19    1.40
   2  -3  -4   50.19    1.70
   2  -3  -4   53.19    1.70
   2   3   4   49.90    1.80
  -2   3  -4   50.89    1.90
  -2   3  -4   52.19    1.20
   2  -3  -4   51.49    1.50
  -3  -3  -4  385.16    7.20
  -3  -3  -4  382.36    7.10
   3   3  -4  386.46    6.60
  -3   3   4  380.06    7.00
  -3   3   4  380.86    7.30
   3   3  -4  394.96    6.30
   3  -3   4  389.76    6.40
  -3   3   4  381.36    7.00
   3  -3   4  380.76    6.10
   3   3  -4  389.46    7.10
  -3   3  -4  390.56    6.80
  -3  -3   4  381.66    7.00
   3  -3  -4  377.66    6.90
   3   3   4  377.46    6.80
   3  -3  -4  373.36    7.20
  -3  -3   4  391.36    6.30
   3  -3  -4  388.46    6.80
  -3   3  -4  380.16    6.30
  -3   3  -4  391.46    7.50
   3  -3  -4  380.96    7.00
   3   3   4  382.76    7.30
   4   3  -4  527.45   10.10
  -4  -3  -4  542.65    9.80
   4   3  -4  536.95    9.20
  -4   3   4  522.55   10.00
   4  -3   4  562.64    9.10
  -4   3   4  539.75    9.50
   4   3  -4  548.55    8.60
  -4  -3  -4  544.45    9.80
  -4   3   4  544.35    9.40
   4  -3   4  536.75    8.60
   4  -3  -4  545.95    9.40
  -4   3  -4  551.34    9.60
   4  -3  -4  538.55    9.60
   4  -3  -4  541.75    9.60
   4   3   4  543.25    9.50
  -4  -3   4  559.94    8.70
  -4  -3   4  567.34   10.10
  -4  -3   4  544.55    9.00
  -4   3  -4  542.55   10.30
   4  -3  -4  547.35   10.00
  -4   3  -4  544.75    8.90
   5  -3   4    2.00    0.40
  -5  -3  -4    1.80    0.60
   5   3  -4    2.30    0.60
  -5   3   4    1.90    0.60
   5  -3   4    2.70    0.50
  -5   3   4    2.20    0.50
  -5   3   4    2.80    0.60
   5   3  -4    2.10    0.50
  -5  -3  -4    2.20    0.60
   5   3   4    2.00    0.50
  -5  -3   4    3.10    0.60
   5  -3  -4    1.30    0.50
  -5   3  -4    2.10    0.60
  -5   3  -4    2.00    0.40
   5  -3  -4    2.40    0.60
   5  -3  -4    2.00    0.60
  -5   3  -4    1.50    0.60
  -5  -3   4    2.20    0.50
  -5  -3   4    2.60    0.40
   5  -3  -4    2.70    0.60
   5   3   4    3.50    0.70
   6   3  -4    1.40    0.40
  -6   3   4    0.80    0.40
  -6  -3  -4    0.80    0.50
   6  -3   4    1.40    0.30
  -6  -3  -4    0.90    0.50
   6   3  -4    1.00    0.50
   6  -3   4    0.70    0.40
  -6   3   4    0.70    0.50
  -6   3   4    1.10    0.40
  -6   3  -4    0.20    0.30
  -6   3  -4    0.50    0.30
   6   3   4    0.60    0.40
  -6  -3   4    1.50    0.40
   6  -3  -4    0.60    0.40
   6  -3  -4    0.80    0.50
  -6  -3   4    1.10    0.50
   6  -3  -4    1.40    0.50
   6   3   4    0.40    0.30
  -6  -3   4    0.70    0.40
  -6   3  -4    0.70    0.50
   7   3  -4  129.89    4.00
   7  -3   4  139.59    3.80
  -7  -3  -4  129.89    4.10
  -7   3   4  127.99    4.20
  -7   3   4  128.39    4.00
   7   3  -4  133.49    3.90
   7  -3   4  134.79    3.30
  -7   3   4  139.39    3.80
  -7  -3  -4  136.09    4.00
   7   3   4  130.59    3.80
   7   3   4  133.79    4.00
  -7   3  -4  136.19    3.60
  -7  -3   4  132.09    3.70
  -7   3  -4  137.89    4.40
  -7   3  -4  135.79    4.10
  -7  -3   4  126.69    4.00
   7  -3  -4  127.79    4.10
  -7  -3   4  134.29    2.90
   7  -3  -4  131.69    4.00
   7  -3  -4  135.29    3.70
   8  -3   4   36.00    1.70
   8   3  -4   33.20    2.00
  -8  -3  -4   35.20    2.00
   8  -3   4   33.10    1.90
  -8  -3  -4   35.90    2.20
  -8   3   4   36.90    1.90
  -8   3   4   34.90    2.10
   8   3  -4   35.60    2.20
  -8   3   4   38.00    2.30
  -8  -3   4   26.30    1.90
   8   3   4   35.40    2.00
   8   3   4   32.60    1.90
   8  -3  -4   33.50    1.80
   8  -3  -4   31.20    1.90
  -8   3  -4   34.50    2.10
   8  -3  -4   32.20    2.00
  -8   3  -4   31.80    1.70
  -8  -3   4   33.50    1.40
  -8   3  -4   34.20    2.20
  -8  -3   4   32.40    1.90
   9  -3   4   32.90    2.00
   9  -3   4   31.20    1.70
  -9  -3  -4   35.30    2.30
  -9   3   4   36.10    2.00
  -9  -3  -4   35.80    2.10
   9   3  -4   30.80    2.10
  -9   3   4   30.70    2.20
  -9   3   4   31.50    2.10
   9  -3  -4   32.90    2.00
  -9  -3   4   33.00    1.40
  -9   3  -4   30.10    2.20
  -9   3  -4   31.20    1.80
  -9   3  -4   31.30    2.20
   9   3   4   30.00    1.90
  -9  -3   4   31.80    2.00
 -10  -3  -4   97.19    4.00
 -10   3   4   91.79    4.00
 -10  -3  -4   93.19    3.60
 -10   3   4   95.69    3.40
  10  -3   4   89.09    3.10
 -10   3   4   93.69    3.80
 -10   3  -4   93.59    4.10
 -10   3  -4   91.49    3.40
 -10  -3   4   94.59    3.60
 -10   3  -4   91.29    4.00
 -10  -3   4   89.09    2.70
 -10  -3   4   97.39    4.00
 -11   3   4   25.80    1.80
 -11   3   4   25.00    2.20
 -11   3   4   25.30    2.10
 -11  -3  -4   22.90    2.10
  11  -3  -4   30.30    2.20
 -11  -3   4   23.50    2.10
 -11  -3   4   25.40    1.90
 -11   3  -4   25.60    2.30
 -11   3  -4   23.90    2.20
 -11  -3   4   26.50    1.40
 -12  -3  -4   53.29    3.40
 -12   3   4   56.99    3.30
 -12   3   4   58.99    2.80
 -12   3   4   57.39    3.50
 -12  -3   4   62.69    3.40
 -12   3  -4   53.59    3.30
 -12  -3   4   58.39    3.10
 -12  -3   4   54.99    2.20
 -12  -3   4   52.59    2.20
 -12   3  -4   58.79    3.40
 -12   3  -4   54.39    2.90
  12  -3  -4   59.79    3.30
 -13   3   4   19.40    2.40
 -13   3   4   21.30    2.20
 -13  -3  -4   15.30    2.20
 -13   3   4   22.60    2.20
 -13  -3   4   16.80    1.40
 -13   3  -4   18.10    2.30
 -13  -3   4   19.20    2.10
  13  -3  -4   15.20    2.10
 -13   3  -4   17.20    2.10
 -13   3  -4   18.50    2.50
   0   4  -4   22.10    0.60
   0   4   4   22.90    1.30
   0  -4  -4   22.00    1.30
   0  -4  -4   22.20    1.00
   0  -4   4   20.20    1.10
   0   4  -4   22.20    1.20
   1  -4   4  120.69    3.20
  -1   4   4  130.49    2.90
  -1   4   4  121.99    2.90
  -1  -4  -4  123.69    3.20
  -1   4   4  119.99    3.20
   1   4  -4  122.89    2.40
  -1  -4  -4  127.39    2.90
   1   4  -4  128.49    2.90
  -1   4   4  118.69    3.30
   1   4  -4  127.39    3.00
   1  -4  -4  119.89    3.10
   1  -4  -4  127.79    3.20
  -1  -4   4  123.49    2.90
   1  -4  -4  124.89    2.90
  -1   4  -4  127.39    2.50
   1   4   4  113.99    2.80
   1   4   4  126.89    3.20
  -1   4  -4  126.59    3.30
  -2   4   4   85.29    2.40
   2   4  -4   84.39    2.20
  -2  -4  -4   91.29    2.70
  -2  -4  -4   89.89    2.50
   2   4  -4   88.79    2.00
  -2   4   4   84.29    2.60
   2   4  -4   90.59    2.40
  -2   4   4   90.89    2.40
   2  -4  -4   86.19    2.60
  -2   4  -4   86.59    2.70
   2  -4  -4   85.49    2.60
  -2   4  -4   84.19    2.10
   2  -4  -4   89.09    2.30
  -2   4  -4   90.39    1.90
   2   4   4   85.09    2.70
   2   4   4   86.29    2.30
  -2  -4   4   87.09    2.20
  -3  -4  -4   52.89    2.00
   3  -4   4   52.09    1.20
  -3   4   4   49.20    1.90
   3  -4   4   50.89    1.40
   3   4  -4   50.79    1.50
  -3   4   4   49.70    2.10
  -3   4   4   53.79    1.80
   3   4  -4   49.50    1.60
  -3   4   4   49.50    2.10
   3   4  -4   50.29    1.90
  -3   4  -4   52.89    1.40
   3  -4  -4   54.09    1.70
   3  -4  -4   57.29    1.90
   3  -4  -4   50.69    2.00
   3   4   4   52.19    2.10
  -3  -4   4   55.29    1.60
   3   4   4   54.39    1.90
  -3   4  -4   55.59    2.30
  -3   4  -4   53.39    1.80
   3  -4  -4   52.69    2.00
  -4   4   4  297.87    6.00
  -4   4   4  289.47    6.40
  -4   4   4  281.77    6.00
  -4  -4  -4  287.17    6.10
   4   4  -4  302.17    6.20
   4  -4   4  294.37    5.50
   4   4  -4  299.27    5.30
  -4  -4  -4  295.97    6.20
   4  -4   4  290.17    5.00
   4   4  -4  297.17    5.70
   4   4   4  296.57    6.40
  -4  -4   4  304.27    5.40
  -4  -4   4  297.37    5.30
  -4   4  -4  300.07    5.40
   4  -4  -4  298.17    6.00
   4  -4  -4  306.97    6.90
   4   4   4  310.77    6.00
  -4   4  -4  294.77    6.60
  -4   4  -4  302.67    6.00
   4  -4  -4  299.27    5.80
   4  -4  -4  298.47    6.40
   5  -4   4  297.47    5.30
   5   4  -4  290.97    6.00
   5  -4   4  301.57    5.90
  -5  -4  -4  300.87    6.50
  -5   4   4  291.77    6.60
  -5  -4  -4  304.27    6.40
   5   4  -4  293.57    6.40
   5   4  -4  296.17    5.40
  -5   4   4  290.27    6.20
  -5   4   4  291.47    6.20
   5   4   4  305.97    6.20
   5   4   4  305.17    6.50
  -5   4  -4  302.97    5.70
   5  -4  -4  297.07    6.60
   5  -4  -4  290.27    6.40
  -5  -4   4  302.97    5.70
   5  -4  -4  303.07    6.00
  -5   4  -4  300.37    6.30
  -5  -4   4  300.17    5.40
   5  -4  -4  289.47    6.20
  -5   4  -4  302.07    6.90
   6  -4   4   37.10    1.40
  -6   4   4   35.20    1.80
   6   4  -4   37.90    1.90
  -6   4   4   40.60    1.90
   6  -4   4   37.10    1.70
  -6   4   4   36.50    2.10
  -6  -4  -4   39.80    2.00
  -6  -4  -4   34.90    2.00
   6   4  -4   39.30    1.80
  -6   4  -4   39.50    2.20
   6  -4  -4   37.00    2.00
  -6   4  -4   36.50    1.60
   6   4   4   37.20    1.80
  -6   4  -4   37.40    1.90
  -6  -4   4   36.90    1.30
   6  -4  -4   38.30    1.70
   6   4   4   37.20    1.90
   6  -4  -4   37.60    1.80
  -6  -4   4   37.30    1.70
  -6  -4   4   36.00    1.90
   7  -4   4  164.08    4.30
   7   4  -4  171.08    4.80
  -7   4   4  166.28    4.50
  -7   4   4  165.98    5.00
  -7  -4  -4  172.38    4.70
   7   4  -4  168.88    4.50
   7  -4   4  165.28    3.80
  -7   4   4  165.48    4.70
  -7  -4  -4  161.68    4.80
   7   4   4  157.48    4.50
   7  -4  -4  161.08    4.80
  -7   4  -4  152.98    4.00
  -7   4  -4  162.38    4.70
   7  -4  -4  162.48    4.20
  -7  -4   4  164.28    3.50
  -7   4  -4  165.38    5.00
  -7  -4   4  159.28    4.10
  -7  -4   4  160.28    4.70
   7   4   4  163.68    5.10
   7  -4  -4  168.28    4.50
   8  -4   4   29.80    1.80
  -8  -4  -4   26.20    1.90
   8  -4   4   29.10    1.50
  -8   4   4   32.30    1.90
  -8  -4  -4   28.90    1.90
   8   4  -4   26.50    1.80
  -8   4   4   27.10    2.00
   8   4  -4   32.20    2.00
  -8   4   4   27.40    1.90
  -8  -4   4   28.80    2.00
   8  -4  -4   27.50    1.80
  -8   4  -4   26.70    1.60
   8  -4  -4   28.50    2.00
  -8   4  -4   25.70    2.00
   8  -4  -4   29.10    1.70
   8   4   4   28.20    1.90
  -8  -4   4   28.40    1.30
   8   4   4   27.70    1.70
  -8  -4   4   29.60    1.80
  -8   4  -4   30.70    2.10
   9  -4   4  145.59    4.40
  -9   4   4  140.79    5.10
  -9  -4  -4  142.79    4.50
  -9  -4  -4  143.09    5.00
  -9   4   4  146.29    4.40
   9  -4   4  144.39    3.90
  -9   4  -4  147.59    4.20
  -9   4  -4  139.89    4.90
  -9  -4   4  148.79    4.40
  -9  -4   4  144.09    4.80
  -9  -4   4  141.59    3.40
   9  -4  -4  138.59    4.50
 -10  -4  -4    0.90    0.70
 -10  -4  -4    1.10    0.70
 -10   4   4    1.30    0.60
 -10   4   4    2.00    0.70
  10  -4   4    1.10    0.60
 -10   4   4    2.10    0.90
 -10   4  -4    1.30    0.60
 -10   4  -4    1.10    0.80
  10  -4  -4    1.20    0.70
 -10   4  -4    3.00    1.00
 -10  -4   4    0.90    0.60
 -11   4   4   33.00    2.40
 -11   4   4   31.40    2.60
 -11   4   4   30.90    2.10
 -11  -4  -4   32.30    2.40
 -11  -4   4   28.70    2.20
 -11  -4   4   30.40    1.50
 -11   4  -4   30.10    2.50
  11  -4  -4   34.30    2.40
 -11   4  -4   31.30    2.40
 -11   4  -4   32.00    2.50
 -12   4   4   51.89    3.10
 -12   4   4   53.89    3.50
 -12  -4  -4   48.20    3.20
 -12   4   4   52.69    2.90
 -12   4  -4   46.90    3.20
 -12   4  -4   47.40    3.10
 -12  -4   4   46.30    2.00
 -12   4  -4   50.79    2.70
 -12  -4   4   45.60    1.90
  12  -4  -4   49.99    3.00
 -12  -4   4   47.70    2.70
   0  -5  -4 1375.96   21.50
   0  -5  -4 1293.27   20.70
   0  -5  -4 1356.66   21.50
   0   5  -4 1349.36   21.30
   0   5  -4 1337.47   19.70
   0  -5   4 1315.47   21.20
   0   5  -4 1349.27   20.30
   0   5   4 1333.77   20.80
   1   5  -4   53.49    1.40
  -1  -5  -4   56.39    1.90
   1   5  -4   55.69    2.00
  -1   5   4   55.59    2.30
  -1  -5  -4   56.69    2.10
   1   5  -4   55.99    1.70
  -1  -5  -4   59.19    2.20
  -1   5   4   53.79    1.80
   1  -5   4   57.39    2.20
  -1   5   4   56.39    1.90
   1   5   4   53.89    2.00
  -1  -5   4   54.59    2.00
  -1   5  -4   55.29    1.60
   1  -5  -4   54.79    2.10
  -1   5  -4   54.89    2.10
   1  -5  -4   53.39    1.80
   1   5   4   56.89    2.20
   2   5  -4  148.59    3.10
   2  -5   4  151.68    4.00
  -2   5   4  147.99    3.40
  -2   5   4  148.29    4.00
  -2  -5  -4  146.39    3.80
  -2   5   4  141.99    3.80
   2   5  -4  149.09    3.50
   2   5  -4  146.79    3.60
  -2  -5  -4  150.68    3.90
  -2  -5  -4  143.29    3.50
  -2  -5   4  147.69    3.50
  -2   5  -4  147.69    2.90
   2  -5  -4  143.89    3.40
   2   5   4  148.99    3.40
  -2   5  -4  148.39    3.30
   2  -5  -4  147.19    3.80
   2  -5  -4  145.09    3.90
  -2   5  -4  150.18    4.00
  -3   5   4  256.17    5.40
  -3   5   4  241.98    5.80
   3   5  -4  247.38    5.00
  -3  -5  -4  252.37    5.40
  -3   5   4  256.77    5.30
  -3   5   4  260.27    5.70
   3   5  -4  255.47    5.00
   3  -5   4  259.27    4.60
  -3  -5  -4  255.37    5.60
   3   5  -4  266.97    5.50
   3  -5   4  253.27    4.20
   3   5  -4  262.87    5.00
  -3   5  -4  255.57    5.20
  -3   5  -4  251.57    4.60
  -3   5  -4  250.27    5.80
  -3  -5   4  251.67    5.00
   3  -5  -4  248.18    5.60
   3  -5  -4  250.47    5.60
   3   5   4  248.48    5.60
   3   5   4  252.07    5.20
   3  -5  -4  244.08    5.60
   4   5  -4   61.69    2.00
  -4  -5  -4   59.79    2.40
   4  -5   4   65.29    1.90
  -4  -5  -4   61.09    2.40
   4  -5   4   59.39    1.60
  -4   5   4   59.49    2.40
   4   5  -4   69.19    2.40
  -4   5   4   66.39    2.30
   4   5  -4   66.39    2.10
  -4  -5  -4   62.89    2.40
   4   5  -4   65.69    2.20
  -4   5   4   62.69    2.60
  -4  -5   4   61.39    2.00
  -4  -5   4   64.09    1.70
  -4   5  -4   62.29    1.80
   4   5   4   65.99    2.20
   4  -5  -4   60.19    2.20
  -4   5  -4   63.09    2.60
   4   5   4   67.29    2.60
  -4   5  -4   65.49    2.70
   4  -5  -4   66.19    2.10
   4  -5  -4   67.19    2.50
   4  -5  -4   60.79    2.50
  -5   5   4   27.90    1.70
  -5   5   4   27.80    1.80
   5   5  -4   26.50    1.40
   5  -5   4   26.50    1.10
   5  -5   4   27.40    1.10
  -5   5   4   23.50    1.50
   5  -5   4   29.10    1.40
  -5  -5  -4   26.50    1.60
   5   5  -4   26.20    1.60
  -5  -5  -4   29.40    1.70
   5   5  -4   26.40    1.20
  -5  -5   4   26.00    1.20
   5  -5  -4   24.40    1.40
  -5   5  -4   27.40    1.60
   5   5   4   26.40    1.50
   5  -5  -4   26.90    1.40
  -5  -5   4   26.30    1.20
   5   5   4   26.00    1.60
   5  -5  -4   28.00    1.70
  -5   5  -4   22.60    1.70
  -5   5  -4   25.00    1.20
   5  -5  -4   24.00    1.60
   5   5   4   25.60    1.70
   6  -5   4  173.68    3.70
   6  -5   4  187.18    4.40
  -6  -5  -4  165.68    4.80
  -6   5   4  173.08    4.60
  -6   5   4  164.68    4.60
   6   5  -4  173.28    4.40
  -6   5   4  172.68    5.10
  -6  -5  -4  172.98    4.70
   6   5  -4  178.88    4.80
   6   5   4  167.78    4.40
   6  -5  -4  167.08    4.40
   6  -5  -4  169.48    4.80
   6  -5  -4  171.88    4.80
  -6   5  -4  171.28    5.10
  -6   5  -4  173.08    4.10
  -6  -5   4  169.88    4.00
   6  -5  -4  170.98    4.20
  -6  -5   4  178.38    3.90
  -6   5  -4  172.78    4.70
   6   5   4  174.48    4.80
   7   5  -4  228.88    6.00
  -7   5   4  236.58    5.90
  -7   5   4  236.88    5.90
   7   5  -4  233.28    5.70
  -7  -5  -4  243.48    6.20
   7  -5   4  240.58    4.90
   7  -5   4  232.88    5.50
  -7  -5  -4  243.58    5.90
  -7   5   4  232.88    6.30
  -7  -5   4  233.48    5.20
  -7   5  -4  232.18    6.30
  -7   5  -4  222.78    5.20
  -7  -5   4  231.68    4.80
   7   5   4  232.58    5.70
  -7   5  -4  231.78    6.00
   7   5   4  237.38    6.10
   7  -5  -4  227.38    6.00
   7  -5  -4  228.18    5.60
  -8   5   4   65.69    2.90
   8  -5   4   63.39    2.20
  -8  -5  -4   62.69    3.00
  -8  -5  -4   59.09    2.80
   8   5  -4   64.49    2.80
  -8   5   4   64.29    2.80
   8  -5   4   62.19    2.60
   8  -5  -4   62.79    2.50
   8  -5  -4   62.89    2.70
   8   5   4   61.19    2.90
   8  -5  -4   57.39    3.30
  -8   5  -4   63.09    3.10
  -8  -5   4   60.99    2.50
  -8  -5   4   61.29    2.10
  -8   5  -4   62.89    3.00
  -8   5  -4   62.59    2.40
  -9   5   4   14.70    1.50
  -9  -5  -4   12.30    1.40
  -9   5   4   17.60    1.80
   9  -5   4   13.30    1.10
  -9  -5  -4   15.40    1.70
   9  -5   4   14.40    1.30
  -9   5   4   10.20    1.40
  -9   5  -4   13.90    1.90
  -9  -5   4   13.50    1.30
  -9   5  -4   13.60    1.30
   9  -5  -4   14.10    1.40
  -9   5  -4   12.30    1.70
 -10   5   4   20.30    1.80
 -10   5   4   18.30    1.80
 -10   5   4   20.40    2.10
  10  -5   4   22.00    1.50
 -10  -5  -4   21.40    2.00
 -10   5  -4   27.00    2.30
 -10  -5   4   22.00    1.70
  10  -5  -4   21.10    1.80
 -10   5  -4   27.70    2.20
 -10   5  -4   23.00    1.70
 -10  -5   4   22.40    1.30
 -11   5   4   93.49    4.10
 -11  -5  -4   92.79    4.20
 -11   5   4   83.29    4.20
 -11   5   4   92.89    4.40
 -11   5  -4   89.89    4.20
 -11   5  -4   88.29    4.20
 -11  -5   4   84.79    2.70
 -11   5  -4   88.29    3.50
  11  -5  -4   86.29    3.80
 -11  -5   4   89.09    3.60
 -12   5   4   58.89    3.30
 -12  -5  -4   53.19    3.30
 -12   5   4   54.69    3.00
 -12  -5   4   57.39    3.00
 -12   5  -4   42.10    3.80
 -12   5  -4   49.70    3.30
 -12  -5   4   48.00    2.10
 -12   5  -4   50.79    2.70
  12  -5  -4   52.39    3.10
   0   6   4  343.07    7.20
   0  -6   4  343.57    7.10
   0   6  -4  343.17    7.00
   0   6  -4  351.46    5.60
   0  -6  -4  332.97    6.40
   0   6  -4  343.47    6.30
   0  -6  -4  338.27    7.10
   0  -6  -4  339.07    7.00
   0   6   4  356.76    6.60
  -1  -6  -4  139.99    3.90
   1   6  -4  139.89    3.30
  -1  -6  -4  138.79    3.80
  -1  -6  -4  139.89    3.40
   1   6  -4  136.59    4.20
   1  -6   4  145.69    4.00
  -1   6   4  138.59    4.00
  -1   6   4  141.89    3.50
   1   6  -4  139.09    2.80
  -1   6   4  139.19    3.90
  -1  -6   4  133.89    3.60
   1   6   4  141.49    3.40
   1  -6  -4  134.29    3.30
   1  -6  -4  133.79    3.80
   1   6   4  138.79    3.90
  -1   6  -4  138.29    3.90
   1  -6  -4  138.19    3.80
  -1   6  -4  132.69    3.20
  -2   6   4  144.49    4.00
  -2   6   4  137.19    3.40
   2   6  -4  141.49    3.60
   2   6  -4  136.79    3.00
  -2   6   4  136.19    3.50
  -2  -6  -4  145.49    4.00
  -2  -6  -4  139.19    3.90
   2  -6   4  134.89    4.00
  -2   6   4  139.19    4.10
   2   6  -4  137.89    3.60
  -2  -6  -4  137.19    3.60
  -2   6  -4  142.99    4.10
   2  -6  -4  138.39    4.00
   2   6   4  141.79    3.40
   2  -6  -4  133.79    3.30
   2  -6  -4  140.29    3.90
   2   6   4  142.49    4.00
  -2   6  -4  136.99    3.40
  -2   6  -4  138.69    3.00
  -3  -6  -4   65.59    2.60
  -3  -6  -4   59.69    2.50
   3  -6   4   68.09    1.70
  -3   6   4   63.29    2.20
  -3   6   4   66.09    2.70
   3  -6   4   63.89    1.40
  -3   6   4   63.79    2.60
   3   6  -4   64.49    2.00
   3   6  -4   65.89    2.20
  -3   6   4   62.29    2.20
   3   6  -4   67.49    2.40
  -3  -6  -4   64.59    2.40
  -3   6  -4   62.09    2.60
   3   6   4   64.19    2.60
   3  -6  -4   64.29    2.20
  -3   6  -4   67.49    2.30
   3   6   4   65.59    2.20
   3  -6  -4   67.19    2.60
  -3   6  -4   66.79    1.90
   3  -6  -4   65.99    2.60
  -3  -6   4   63.49    2.20
   4   6  -4  156.58    4.30
   4   6  -4  160.38    3.80
  -4  -6  -4  157.28    4.20
   4  -6   4  157.78    3.00
  -4  -6  -4  156.28    4.30
   4   6  -4  157.78    3.80
  -4  -6  -4  154.88    4.30
  -4   6   4  160.98    4.10
  -4   6   4  160.68    4.60
  -4   6   4  153.78    4.40
   4  -6   4  161.38    3.50
   4   6   4  158.38    4.50
  -4   6  -4  164.28    4.70
  -4   6  -4  162.98    4.20
   4  -6  -4  155.78    4.50
  -4  -6   4  159.08    3.90
  -4   6  -4  162.98    3.60
   4  -6  -4  155.68    3.90
   4  -6  -4  163.78    4.50
   4   6   4  160.68    4.00
  -5   6   4   82.69    3.30
  -5  -6  -4   91.09    3.10
   5   6  -4   76.19    2.90
   5  -6   4   83.59    3.20
  -5  -6  -4   78.59    2.90
  -5   6   4   77.69    2.80
   5   6  -4   85.79    2.80
  -5   6   4   76.79    3.00
   5   6  -4   80.59    2.50
   5  -6   4   83.29    2.10
   5   6   4   82.29    2.80
   5  -6  -4   78.79    3.10
   5   6   4   80.29    3.10
  -5  -6   4   86.39    2.60
   5  -6  -4   80.69    3.10
  -5   6  -4   81.39    3.00
  -5   6  -4   83.39    3.40
  -5  -6   4   83.59    2.30
  -5  -6   4   83.49    2.20
   5  -6  -4   82.89    2.80
  -5   6  -4   85.29    2.80
  -6  -6  -4  122.99    4.00
   6   6  -4  131.99    3.40
   6   6  -4  124.39    3.70
   6  -6   4  125.29    3.40
   6  -6   4  124.79    3.10
  -6   6   4  127.49    3.90
  -6  -6  -4  129.39    4.00
  -6   6   4  121.19    4.00
   6   6  -4  142.09    4.90
  -6   6   4  133.89    4.50
   6   6   4  121.49    3.70
  -6   6  -4  127.59    3.40
   6  -6  -4  125.89    4.10
   6  -6  -4  120.59    3.60
   6   6   4  118.19    4.50
  -6  -6   4  128.89    3.20
  -6   6  -4  125.59    4.00
  -6  -6   4  123.79    3.40
   6  -6  -4  125.39    3.50
  -6   6  -4  126.69    4.40
   6  -6  -4  120.09    4.70
  -7   6   4  215.78    5.80
  -7   6   4  206.48    6.10
   7  -6   4  216.48    5.20
   7   6  -4  215.98    5.50
  -7   6   4  216.08    5.70
   7  -6   4  214.98    4.60
   7   6  -4  217.48    5.90
  -7  -6  -4  219.08    5.70
   7  -6   4  218.48    4.80
  -7  -6  -4  203.58    5.70
  -7   6  -4  216.38    6.20
   7   6   4  201.58    5.80
   7  -6  -4  204.98    5.00
   7  -6  -4  212.58    5.30
   7  -6  -4  208.78    5.80
  -7   6  -4  205.68    5.70
  -7  -6   4  219.78    5.10
   7   6   4  204.98    5.40
  -7  -6   4  215.28    4.90
  -7   6  -4  208.58    5.00
   8  -6   4   27.60    1.70
  -8   6   4   23.20    1.90
  -8  -6  -4   29.90    2.10
  -8   6   4   27.10    2.20
   8  -6   4   27.40    1.40
  -8   6   4   28.20    2.00
  -8  -6  -4   25.90    1.80
   8  -6   4   25.50    1.50
  -8   6  -4   24.00    1.90
   8  -6  -4   26.30    1.80
  -8   6  -4   27.40    1.60
  -8  -6   4   25.40    1.40
  -8  -6   4   26.90    1.60
   9  -6   4   19.70    1.30
   9  -6   4   25.30    1.70
  -9   6   4   25.20    2.20
  -9   6   4   24.80    1.90
  -9  -6  -4   23.50    1.90
  -9  -6  -4   24.70    2.00
  -9   6   4   21.80    1.90
   9  -6   4   22.00    1.50
  -9  -6   4   23.80    1.70
  -9  -6   4   20.50    1.30
  -9   6  -4   21.60    2.00
  -9   6  -4   27.00    2.20
  -9   6  -4   22.70    1.60
  10  -6   4   14.80    1.30
  10  -6   4   10.10    1.10
 -10   6   4   13.10    1.90
 -10  -6  -4   12.00    1.70
 -10   6   4   10.70    1.50
  10  -6  -4    8.70    1.40
 -10  -6   4   12.20    1.50
 -10   6  -4   11.40    1.80
 -10   6  -4   12.90    1.30
 -10   6  -4   13.30    1.90
 -10  -6   4   12.10    1.10
 -11  -6  -4   24.10    2.20
 -11   6   4   23.80    2.40
 -11   6   4   21.90    2.00
  11  -6   4   21.90    1.70
 -11   6   4   21.70    2.00
 -11   6  -4   20.20    2.50
 -11   6  -4   22.10    1.80
 -11   6  -4   21.90    2.30
  11  -6  -4   28.60    2.20
 -11  -6   4   21.20    1.40
 -11  -6   4   19.70    1.70
 -12  -6  -4   25.90    2.40
 -12   6   4   24.00    2.60
 -12   6   4   23.90    2.20
  12  -6   4   23.80    1.90
 -12  -6   4   28.30    2.10
  12  -6  -4   24.10    2.20
 -12   6  -4   21.10    2.30
 -12   6  -4   25.90    2.50
 -12   6  -4   25.70    2.00
   0   7   4  391.76    8.30
   0  -7  -4  397.56    8.00
   0  -7  -4  391.96    8.30
   0   7  -4  398.86    7.40
   0   7  -4  401.56    6.50
   0  -7   4  400.56    8.20
   0   7   4  397.26    7.50
   0   7  -4  395.86    8.10
   0  -7  -4  388.46    7.40
   1   7  -4   69.59    2.30
  -1  -7  -4   67.69    2.70
   1   7  -4   64.99    1.70
   1   7  -4   68.59    2.60
  -1   7   4   74.49    2.90
  -1   7   4   65.69    2.80
  -1  -7  -4   69.89    2.60
   1  -7   4   69.09    2.80
  -1  -7  -4   65.99    2.30
  -1   7   4   66.29    2.30
   1   7   4   67.59    2.80
  -1   7  -4   65.59    2.70
   1  -7  -4   71.79    2.70
  -1   7  -4   64.09    2.20
   1   7   4   67.39    2.20
  -1   7  -4   62.89    1.50
  -1  -7   4   63.99    2.50
   1  -7  -4   66.79    2.20
  -2  -7  -4   10.90    1.10
  -2  -7  -4   11.40    1.10
  -2   7   4   10.40    1.40
  -2  -7  -4   11.60    1.20
   2  -7   4   11.60    1.20
  -2   7   4   11.10    1.00
   2   7  -4   10.50    0.80
   2   7  -4   11.00    1.10
  -2   7   4   11.30    1.20
  -2   7   4    9.10    0.90
  -2  -7   4   11.80    1.10
   2   7   4    9.10    0.90
   2  -7  -4   10.00    1.30
  -2   7  -4   11.50    1.20
  -2   7  -4   10.00    0.90
  -2   7  -4   10.00    1.30
   2  -7  -4    9.60    0.80
   2  -7  -4    8.30    1.10
   2   7   4   10.20    1.40
   3   7  -4   44.90    1.90
   3   7  -4   47.60    2.10
  -3  -7  -4   43.30    2.20
  -3  -7  -4   42.70    2.00
  -3   7   4   44.10    2.30
  -3   7   4   45.90    2.40
   3  -7   4   45.50    2.40
  -3   7   4   45.40    2.00
  -3  -7  -4   48.20    2.30
  -3   7   4   45.10    1.90
   3   7  -4   42.80    1.70
  -3  -7   4   49.20    2.10
   3   7   4   46.90    1.90
  -3   7  -4   46.10    2.00
   3  -7  -4   46.60    1.90
  -3   7  -4   42.50    2.30
   3  -7  -4   47.40    2.40
   3  -7  -4   49.60    2.30
   3   7   4   48.20    2.40
  -4  -7  -4  120.29    3.80
  -4  -7  -4  123.89    3.90
  -4   7   4  116.99    3.90
   4  -7   4  119.89    2.90
  -4   7   4  122.79    4.20
  -4   7   4  123.89    3.60
   4  -7   4  118.19    2.40
   4   7  -4  116.59    3.40
  -4  -7  -4  120.59    3.90
   4   7  -4  123.99    3.30
   4   7  -4  114.49    3.70
  -4  -7  -4  128.39    3.80
   4   7   4  127.39    4.10
   4  -7  -4  121.59    4.00
   4  -7  -4  118.69    3.80
  -4  -7   4  124.79    3.50
  -4   7  -4  122.89    4.20
  -4   7  -4  126.69    3.10
   4  -7  -4  120.99    3.40
  -4   7  -4  113.59    3.60
   4   7   4  125.89    3.50
  -5   7   4   15.90    1.50
   5  -7   4   16.60    0.90
   5   7  -4   16.00    1.30
   5   7  -4   15.50    1.20
   5   7  -4   13.80    1.30
  -5  -7  -4   17.00    1.50
  -5  -7  -4   15.50    1.40
  -5   7   4   14.30    1.30
  -5   7   4   18.40    1.80
   5   7   4   16.20    1.50
  -5   7  -4   16.30    1.40
   5  -7  -4   13.50    1.40
   5  -7  -4   17.80    1.50
  -5   7  -4   15.30    1.50
  -5   7  -4   15.50    1.10
  -5  -7   4   16.30    1.20
   5  -7  -4   15.60    1.20
  -6   7   4   50.69    2.70
   6   7  -4   58.99    2.40
   6   7  -4   55.19    2.70
   6  -7   4   54.29    1.80
   6   7  -4   53.99    2.20
  -6   7   4   52.39    2.80
   6  -7   4   56.79    2.20
  -6  -7  -4   52.69    2.60
  -6   7   4   50.39    2.50
   6   7   4   51.59    2.70
  -6   7  -4   56.89    3.00
  -6   7  -4   53.29    2.10
  -6  -7   4   57.29    1.90
   6  -7  -4   51.49    2.30
  -6  -7   4   57.79    2.20
  -6   7  -4   54.19    2.60
   6  -7  -4   51.59    2.60
   6   7   4   53.39    2.40
  -6  -7   4   52.99    1.90
   6  -7  -4   52.69    2.80
   6   7   4   54.89    2.80
   7  -7   4   98.59    3.20
   7  -7   4   99.19    2.80
  -7   7   4   97.69    4.10
  -7  -7  -4  101.29    3.80
  -7  -7  -4   96.69    3.60
  -7   7   4   95.49    3.60
  -7   7   4   98.39    3.80
   7   7  -4   97.89    3.50
  -7  -7   4   99.99    3.10
  -7   7  -4  102.49    3.20
   7  -7  -4   97.19    3.90
  -7  -7   4   95.29    3.00
   7  -7  -4   94.69    3.10
   7  -7  -4   93.99    3.30
  -7  -7   4   90.09    2.80
  -7   7  -4   98.29    3.80
  -8  -7  -4  297.37    7.40
  -8   7   4  308.27    7.80
  -8   7   4  311.67    7.70
   8  -7   4  304.47    6.80
   8  -7   4  318.17    6.40
  -8  -7  -4  315.27    8.90
  -8   7   4  311.17    8.30
  -8   7  -4  317.97    8.40
  -8  -7   4  316.47    6.60
  -8   7  -4  313.57    7.00
  -8   7  -4  315.47    8.00
  -8  -7   4  314.07    6.60
   8  -7  -4  310.97    7.20
  -9  -7  -4   15.60    1.90
  -9   7   4   15.70    1.70
   9  -7   4   14.80    1.50
   9  -7   4   13.40    1.20
  -9   7   4   17.60    1.70
  -9   7   4   14.50    2.00
  -9  -7   4   17.20    1.30
   9  -7  -4   16.50    1.50
  -9   7  -4   15.80    1.40
  -9   7  -4   18.00    2.00
  -9   7  -4   19.50    1.90
  -9  -7   4   16.10    1.30
 -10   7   4   16.70    2.10
 -10   7   4   14.30    1.80
  10  -7   4   17.30    1.40
 -10   7   4   15.80    2.10
 -10  -7  -4   16.60    1.80
 -10  -7   4   14.50    1.30
 -10   7  -4   15.70    1.50
 -10   7  -4   14.50    2.00
  10  -7  -4   13.90    1.50
 -10   7  -4   19.20    2.10
 -10  -7   4   15.10    1.40
 -11   7   4   34.80    2.50
 -11   7   4   33.90    2.60
 -11   7   4   30.50    4.20
 -11  -7  -4   33.30    2.50
  11  -7   4   33.40    2.10
 -11   7  -4   32.40    3.10
 -11  -7   4   35.40    2.20
 -11  -7   4   30.20    1.80
  11  -7  -4   35.70    2.40
 -11   7  -4   32.70    2.20
 -11   7  -4   25.70    2.50
   0   8   4  258.07    5.50
   0   8   4  246.58    6.30
   0  -8  -4  251.47    5.90
   0   8  -4  246.88    4.50
   0  -8  -4  247.08    6.30
   0   8  -4  250.17    6.20
   0   8  -4  250.47    5.60
   0  -8  -4  246.78    5.40
   0  -8   4  244.78    6.10
  -1   8   4  117.19    3.30
  -1  -8  -4  116.09    3.70
  -1   8   4  114.89    3.30
  -1   8   4  108.39    3.90
   1   8  -4  108.09    3.60
   1  -8   4  107.29    3.80
  -1   8   4  113.09    3.90
  -1  -8  -4  118.09    3.40
   1   8  -4  109.39    3.30
   1   8  -4  112.39    2.60
  -1  -8  -4  121.89    4.00
   1  -8  -4  117.79    3.70
   1  -8  -4  117.29    3.20
   1   8   4  111.29    3.90
  -1  -8   4  113.99    3.70
  -1   8  -4  104.09    3.70
   1  -8  -4  110.19    3.90
  -1   8  -4  109.39    2.40
  -1   8  -4  115.39    3.40
   1   8   4  115.89    3.20
   2   8  -4   87.39    3.10
  -2   8   4   85.39    2.80
  -2   8   4   83.89    3.40
   2   8  -4   79.29    2.60
  -2  -8  -4   82.49    3.10
  -2   8   4   83.79    3.40
  -2  -8  -4   83.59    2.90
  -2  -8  -4   89.79    3.40
   2  -8   4   81.89    3.40
  -2   8   4   82.39    2.80
   2  -8  -4   86.79    3.40
  -2   8  -4   89.39    2.50
  -2   8  -4   87.59    2.90
  -2  -8   4   88.89    3.20
   2  -8  -4   87.09    3.20
   2  -8  -4   88.29    2.70
   2   8   4   82.69    3.30
   2   8   4   83.59    2.70
  -2   8  -4   85.19    3.40
  -3   8   4   14.70    1.20
   3  -8   4   14.30    1.50
  -3   8   4   16.90    1.60
   3   8  -4   15.80    1.40
  -3  -8  -4   14.90    1.40
  -3   8   4   16.70    1.70
   3   8  -4   17.20    1.10
  -3  -8  -4   16.40    1.40
   3   8  -4   16.00    1.30
  -3  -8  -4   15.70    1.50
  -3   8   4   16.00    1.30
   3  -8  -4   18.90    1.90
  -3   8  -4   16.90    1.60
  -3  -8   4   16.90    1.40
  -3   8  -4   16.70    1.10
   3   8   4   17.50    1.60
  -3   8  -4   17.60    1.40
   3   8   4   17.50    1.30
   3  -8  -4   17.60    1.50
   3  -8  -4   16.80    1.20
  -4   8   4  151.68    4.90
  -4  -8  -4  149.39    4.30
   4   8  -4  142.99    4.10
  -4   8   4  150.08    4.80
  -4  -8  -4  147.79    4.40
  -4   8   4  141.89    4.10
   4  -8   4  146.39    2.90
  -4   8   4  153.88    4.30
   4   8  -4  154.38    4.60
  -4  -8  -4  148.59    4.60
  -4  -8  -4  144.79    4.50
   4   8  -4  152.98    3.80
   4  -8  -4  149.69    3.90
  -4   8  -4  146.99    4.40
  -4   8  -4  157.58    5.10
   4  -8  -4  151.98    4.90
  -4  -8   4  158.18    4.30
   4  -8  -4  149.19    4.50
  -4   8  -4  155.88    3.80
   4   8   4  156.18    4.80
  -5   8   4   98.99    4.00
   5   8  -4  100.39    3.70
  -5  -8  -4   94.89    3.60
   5  -8   4   99.39    2.30
   5   8  -4   91.69    3.00
  -5   8   4   89.29    3.70
  -5  -8  -4  103.59    3.60
  -5   8   4   94.49    3.40
   5   8  -4   97.89    3.30
   5   8   4   97.99    3.30
  -5   8  -4   97.29    3.60
   5  -8  -4   96.09    3.60
   5   8   4   96.79    3.80
   5  -8  -4   99.79    3.10
  -5  -8   4  100.79    3.30
   5  -8  -4   92.09    3.80
  -5   8  -4   97.39    4.00
  -5   8  -4   95.59    2.90
  -6   8   4   83.39    3.70
  -6   8   4   81.29    3.50
   6   8  -4   75.29    2.80
  -6  -8  -4   77.79    3.30
  -6   8   4   77.49    3.20
   6  -8   4   77.79    2.60
   6  -8   4   76.09    2.10
  -6  -8  -4   74.19    3.20
   6   8  -4   83.29    2.90
   6   8   4   80.79    3.50
  -6  -8   4   70.29    2.80
  -6   8  -4   76.29    2.70
   6  -8  -4   75.69    4.10
   6  -8  -4   84.29    2.90
  -6   8  -4   82.99    3.40
   6  -8  -4   74.19    3.20
  -7   8   4  138.69    4.60
  -7  -8  -4  137.39    4.60
   7  -8   4  137.59    3.30
   7   8  -4  137.19    4.00
   7  -8   4  134.19    3.80
  -7   8   4  132.99    5.00
   7  -8  -4  135.59    4.10
  -7   8  -4  138.09    5.10
  -7   8  -4  137.99    4.00
  -7  -8   4  133.59    3.90
  -8   8   4    9.60    1.70
   8  -8   4    8.40    0.90
  -8  -8  -4    8.20    1.30
  -8   8   4    5.90    1.20
  -8   8   4    7.40    1.30
   8  -8   4    8.20    1.10
  -8   8  -4    4.80    1.20
  -8   8  -4    8.50    1.50
  -8  -8   4    6.40    1.10
   8  -8  -4    8.40    1.20
  -8   8  -4    7.60    1.10
  -8  -8   4    8.80    1.00
  -8  -8   4    8.60    1.10
  -9  -8  -4   36.10    2.50
   9  -8   4   32.20    2.00
   9  -8   4   35.60    1.80
  -9   8   4   31.00    2.60
  -9   8   4   34.70    2.40
  -9   8   4   32.70    2.50
  -9  -8   4   30.60    1.70
  -9  -8   4   32.40    1.80
  -9   8  -4   34.60    2.70
   9  -8  -4   32.40    2.10
  -9  -8   4   30.00    1.80
  -9   8  -4   33.10    2.60
  -9   8  -4   32.00    2.00
 -10   8   4    1.10    0.80
 -10  -8  -4    2.50    1.10
  10  -8   4    2.00    0.70
 -10   8   4    3.20    1.00
 -10   8   4    2.00    1.00
 -10   8  -4    2.50    0.80
 -10  -8   4    2.70    0.80
 -10  -8   4    3.50    1.00
  10  -8  -4    1.80    0.70
 -10  -8   4    0.70    0.70
 -10   8  -4    1.90    1.00
 -10   8  -4    3.30    1.20
   0   9   4  298.77    6.50
   0  -9  -4  312.67    6.50
   0   9  -4  314.87    7.40
   0   9  -4  297.77    6.80
   0  -9   4  306.17    8.80
   0  -9  -4  315.97    7.10
   0  -9  -4  306.37    7.60
   0   9  -4  310.97    5.50
   0   9   4  314.37    7.60
   1   9  -4  152.48    4.60
  -1  -9  -4  160.08    5.00
  -1   9   4  160.88    5.00
  -1   9   4  152.28    4.20
   1  -9   4  160.88    5.00
  -1  -9  -4  161.78    4.60
  -1  -9  -4  157.98    4.20
  -1   9   4  161.18    5.10
  -1   9   4  145.59    4.10
   1   9  -4  161.78    3.40
  -1  -9   4  158.78    4.80
   1   9   4  156.18    5.00
  -1   9  -4  145.59    3.10
   1   9   4  146.19    4.00
   1  -9  -4  150.18    4.90
   1  -9  -4  151.08    3.90
  -1   9  -4  161.08    4.40
  -1   9  -4  152.08    4.80
   1  -9  -4  160.28    4.60
  -2  -9  -4   42.00    2.10
  -2   9   4   44.10    2.10
   2   9  -4   50.59    2.50
   2   9  -4   45.90    1.60
  -2  -9  -4   47.50    2.50
  -2   9   4   43.50    2.70
   2  -9   4   41.10    2.50
  -2  -9  -4   44.20    2.30
  -2   9   4   42.90    2.00
  -2   9   4   45.50    2.60
  -2   9  -4   45.40    2.20
  -2   9  -4   42.00    2.50
   2   9   4   45.60    2.60
   2  -9  -4   40.80    2.40
  -2  -9   4   45.60    2.40
   2  -9  -4   44.40    2.30
   2  -9  -4   43.20    1.90
   2   9   4   43.30    2.00
  -2   9  -4   42.40    1.80
  -3  -9  -4   47.80    2.40
   3   9  -4   48.80    1.80
  -3  -9  -4   45.20    2.50
   3  -9   4   46.50    2.70
  -3  -9  -4   46.00    2.40
  -3   9   4   50.19    2.30
  -3   9   4   50.69    2.20
  -3   9   4   49.00    2.70
  -3   9   4   47.60    2.80
   3   9  -4   47.50    2.40
   3  -9  -4   49.99    2.80
  -3   9  -4   50.69    2.80
   3  -9  -4   49.00    2.10
   3   9   4   53.99    2.80
  -3  -9   4   48.80    2.40
   3  -9  -4   53.59    3.00
   3   9   4   53.89    2.20
  -3   9  -4   50.09    2.40
  -3   9  -4   49.60    2.00
  -4   9   4  107.79    4.10
   4   9  -4  101.49    3.70
  -4  -9  -4  100.09    3.90
  -4  -9  -4   95.39    3.60
   4   9  -4  101.09    3.00
   4   9  -4   98.39    3.50
  -4   9   4   93.49    3.30
  -4   9   4  100.29    4.10
  -4  -9  -4  105.69    3.60
   4  -9   4  100.39    2.20
  -4  -9  -4   97.49    4.30
  -4   9   4   99.29    3.50
  -4   9  -4  100.09    3.00
  -4   9  -4  103.29    3.70
   4   9   4  105.09    3.40
   4   9   4  103.29    4.00
  -4   9  -4  101.29    4.30
   4  -9  -4  105.49    3.20
   4  -9  -4  105.09    3.70
  -4  -9   4  101.59    3.60
  -5   9   4   18.70    1.90
   5   9  -4   16.50    1.30
  -5  -9  -4   21.10    1.70
  -5   9   4   15.70    2.20
   5  -9   4   15.50    0.80
   5   9  -4   17.70    1.50
  -5  -9  -4   17.80    1.60
  -5  -9   4   17.10    1.40
  -5   9  -4   16.30    1.20
   5  -9  -4   15.90    1.30
   5   9   4   17.80    1.80
  -5   9  -4   17.70    1.70
  -5   9  -4   13.10    1.70
   5  -9  -4   18.40    1.60
   6   9  -4   85.59    3.20
  -6  -9  -4   87.19    3.50
  -6   9   4   83.69    3.80
   6  -9   4   84.19    2.60
  -6   9   4   82.39    3.90
  -6   9   4   82.29    3.40
   6   9  -4   80.09    3.00
  -6  -9  -4   83.79    3.60
   6  -9   4   86.69    2.20
  -6  -9   4   82.49    3.10
  -6   9  -4   82.49    2.90
   6  -9  -4   88.69    3.10
   6   9   4   80.69    4.80
  -6   9  -4   85.59    4.00
  -6   9  -4   88.49    3.70
  -7   9   4   40.90    2.90
   7   9  -4   47.40    2.30
   7  -9   4   39.90    1.90
  -7   9   4   48.60    2.70
  -7   9   4   42.60    2.80
   7  -9   4   41.50    1.60
  -7   9  -4   47.80    3.00
   7  -9  -4   41.30    2.10
  -7   9  -4   39.30    2.60
   7   9   4   44.00    2.70
  -7  -9   4   41.80    2.20
  -7   9  -4   39.50    2.00
  -8   9   4  132.29    4.70
  -8  -9  -4  126.79    4.60
  -8   9   4  123.79    5.10
  -8   9   4  119.99    4.80
   8  -9   4  121.39    3.20
   8  -9   4  116.39    3.60
   8  -9  -4  121.29    4.00
  -8   9  -4  123.09    4.80
  -8   9  -4  126.29    4.00
  -8  -9   4  121.59    3.90
  -8   9  -4  130.29    5.30
  -9   9   4    1.10    0.70
   9  -9   4    0.00    0.60
  -9   9   4    1.00    1.00
  -9   9   4    0.70    0.80
   9  -9   4    0.50    0.50
  -9  -9  -4    0.70    0.80
   9  -9  -4    0.50    0.60
  -9  -9   4   -1.50    0.70
  -9   9  -4    0.40    0.80
  -9   9  -4    0.80    0.80
 -10   9   4   13.40    2.20
 -10   9   4   13.30    1.90
  10  -9   4   12.50    1.20
 -10   9   4   12.10    1.90
 -10  -9  -4   13.50    1.90
 -10   9  -4   16.40    2.30
 -10  -9   4   10.10    2.00
 -10   9  -4   14.10    1.60
 -10   9  -4   11.00    3.10
  10  -9  -4   10.40    1.50
   0  10  -4   57.59    2.70
   0  10  -4   59.39    1.80
   0 -10  -4   56.29    2.40
   0 -10  -4   62.59    2.80
   0  10  -4   60.19    2.90
   0 -10   4   50.99    2.80
   0  10   4   57.29    2.40
  -1  10   4  251.57    7.60
  -1  10   4  239.38    5.70
   1  10  -4  238.18    4.80
  -1 -10  -4  246.18    6.30
  -1  10   4  245.08    6.20
   1  10  -4  251.27    6.60
  -1 -10  -4  248.58    5.90
  -1  10  -4  251.77    6.20
   1 -10  -4  252.27    5.70
  -1  10  -4  239.18    4.60
  -1 -10   4  237.88    6.60
  -1  10  -4  250.97    6.80
   1  10   4  246.48    6.40
   2  10  -4  155.18    3.60
  -2 -10  -4  157.88    4.50
   2  10  -4  152.58    4.80
  -2  10   4  148.59    4.20
  -2  10   4  155.78    5.20
   2 -10  -4  151.78    4.10
  -2  10  -4  154.38    4.70
  -2  10  -4  158.18    4.00
   2  10   4  155.58    4.30
  -2 -10   4  156.88    4.90
   2 -10  -4  157.28    4.70
  -3  10   4  130.89    4.00
   3  10  -4  132.69    4.40
  -3  10   4  138.39    5.00
  -3 -10  -4  132.19    4.20
   3  10  -4  127.59    3.30
   3  10  -4  134.79    4.40
  -3  10   4  134.79    4.10
  -3  10   4  123.49    4.70
  -3 -10  -4  125.09    4.20
   3 -10  -4  128.29    4.20
  -3  10  -4  131.99    3.60
  -3  10  -4  139.29    4.40
   3 -10  -4  131.49    3.70
   3  10   4  129.89    4.70
  -3 -10   4  126.69    4.40
  -3  10  -4  136.09    4.90
   3  10   4  131.99    3.90
  -4  10   4   51.79    2.60
   4  10  -4   56.29    2.20
  -4  10   4   49.90    3.00
   4  10  -4   53.89    2.70
  -4 -10  -4   56.59    2.60
  -4 -10  -4   52.99    2.70
  -4  10   4   56.89    3.20
   4  10   4   57.59    3.00
  -4  10  -4   54.09    3.10
  -4  10  -4   57.89    2.30
   4 -10  -4   55.79    2.30
  -4 -10   4   48.20    2.60
   4 -10  -4   55.29    2.80
  -4  10  -4   56.99    2.80
  -5  10   4   12.90    1.90
  -5 -10  -4   14.70    1.70
   5  10  -4   14.80    1.20
  -5 -10  -4   13.30    1.60
  -5  10   4   14.10    1.50
   5  10  -4   13.50    1.40
  -5  10   4   15.20    2.10
   5  10   4   15.70    1.80
   5 -10  -4   14.00    1.20
  -5  10  -4   13.00    1.70
  -5 -10   4   13.00    1.40
  -5  10  -4   11.30    1.70
  -5  10  -4   13.70    1.20
  -6  10   4   11.00    1.80
  -6  10   4   12.90    2.00
  -6  10   4   14.40    1.70
   6 -10   4   13.20    0.80
   6  10  -4   13.30    1.40
  -6 -10  -4   12.90    1.70
  -6  10  -4   14.00    2.00
   6 -10  -4   13.50    1.30
  -6  10  -4   13.20    1.20
   6  10   4   14.20    1.90
  -6 -10   4   12.90    1.60
  -6  10  -4   12.10    1.80
  -7  10   4   32.20    2.50
  -7 -10  -4   36.70    2.30
   7 -10   4   32.30    1.70
   7 -10   4   32.30    1.40
  -7  10   4   33.50    2.70
   7  10  -4   31.20    2.10
  -7  10   4   32.30    2.30
  -7  10  -4   32.30    2.70
   7 -10  -4   31.10    2.20
  -7 -10   4   30.50    2.00
  -7  10  -4   32.10    2.40
   7  10   4   29.90    2.50
  -7  10  -4   30.60    1.90
  -8 -10  -4    5.30    1.20
   8 -10   4    7.10    0.80
  -8  10   4    5.20    1.30
  -8  10   4    5.20    1.30
   8 -10   4    7.50    1.00
  -8  10   4    6.00    1.40
  -8  10  -4    7.30    1.70
   8 -10  -4    7.20    1.20
  -8 -10   4    7.20    1.10
  -8  10  -4    5.30    1.30
  -9  10   4   31.50    2.90
  -9 -10  -4   35.20    2.50
  -9  10   4   28.00    2.60
   9 -10   4   29.00    1.50
   9 -10   4   35.40    2.00
  -9  10   4   31.70    2.50
   9 -10  -4   33.20    2.10
  -9  10  -4   34.40    3.00
  -9  10  -4   32.20    2.10
  -9  10  -4   29.40    2.60
  -9 -10   4   25.00    2.10
   0 -11  -4   22.30    1.70
   0  11   4   17.50    1.90
   0  11  -4   20.00    1.30
   0  11   4   18.00    1.40
   0 -11  -4   21.00    1.50
   0  11  -4   20.90    1.80
   0  11  -4   22.40    2.00
  -1  11   4   15.80    1.50
   1  11  -4   17.90    1.10
  -1 -11  -4   17.20    1.50
  -1 -11  -4   16.90    1.60
  -1  11   4   17.00    1.80
   1  11  -4   15.60    2.00
  -1  11   4   17.30    1.40
   1  11   4   16.20    1.40
   1  11   4   17.10    2.20
  -1  11  -4   15.90    1.70
  -1  11  -4   17.30    0.90
   1 -11  -4   20.40    1.50
   1 -11  -4   16.80    1.60
  -1  11  -4   16.00    1.70
  -2  11   4    0.90    0.80
  -2  11   4    0.20    0.80
  -2 -11  -4    2.30    0.70
  -2 -11  -4    1.10    0.70
   2  11  -4    1.60    0.50
  -2  11   4    2.00    0.70
  -2  11   4    2.00    0.70
  -2  11  -4    1.40    0.60
   2  11   4    1.40    0.80
  -2  11  -4    0.90    0.70
   2 -11  -4    2.10    0.80
   2 -11  -4    2.10    0.60
  -2  11  -4    3.40    0.90
  -3 -11  -4    6.50    1.10
  -3  11   4    6.60    1.40
  -3  11   4    6.50    1.00
  -3 -11  -4    7.50    1.20
  -3 -11  -4    9.60    1.60
  -3  11   4    9.20    1.60
   3  11  -4    8.50    1.50
  -3  11   4   11.20    1.50
  -3  11  -4    7.70    1.00
   3  11   4    7.70    1.40
  -3  11  -4    8.40    1.60
   3 -11  -4    8.10    1.10
  -3  11  -4    7.70    1.40
   3 -11  -4    6.20    1.30
  -4  11   4   -0.10    0.70
  -4 -11  -4    0.20    0.70
  -4  11   4    0.90    0.80
   4  11  -4    0.80    0.80
  -4  11   4    0.40    0.40
  -4 -11  -4    0.60    0.70
   4  11   4    0.80    0.60
   4 -11  -4    1.40    0.50
  -4  11  -4    1.50    0.50
  -4  11  -4    1.70    0.70
  -4  11  -4    0.90    0.70
  -5  11   4   52.99    2.70
  -5  11   4   48.60    3.20
  -5 -11  -4   48.80    2.60
   5  11  -4   43.00    2.10
   5  11  -4   46.90    2.80
  -5  11   4   50.89    3.30
   5  11   4   48.00    3.00
  -5  11  -4   43.50    2.20
   5 -11  -4   45.90    2.20
  -5  11  -4   47.60    3.10
  -5  11  -4   49.99    2.90
  -6 -11  -4   23.30    1.90
   6  11  -4   25.00    2.40
  -6  11   4   28.90    2.50
  -6  11   4   25.70    2.10
  -6  11   4   25.50    2.40
   6  11   4   24.80    2.30
  -6  11  -4   21.90    1.60
  -6  11  -4   28.90    2.50
  -6  11  -4   24.30    2.20
  -7  11   4    5.30    1.40
  -7 -11  -4    5.10    1.20
   7 -11   4    6.00    0.70
  -7  11   4    4.50    1.50
  -7  11   4    5.50    1.10
  -7  11  -4    2.70    1.00
  -7  11  -4    4.30    0.90
  -7  11  -4    4.50    1.30
   7  11   4    6.20    1.50
   7 -11  -4    5.30    1.00
   8 -11   4  110.59    2.80
  -8  11   4  117.09    4.70
  -8 -11  -4  109.89    4.40
  -8  11   4  138.79    7.70
   8  11  -4  121.69    4.40
  -8  11   4  109.79    5.20
  -8  11  -4  116.69    5.00
  -8  11  -4  105.39    3.90
  -8  11  -4  116.99    5.30
   8 -11  -4  115.19    3.90
   0  12   4  123.49    4.90
   0  12  -4  113.29    4.60
   0 -12  -4  115.09    4.10
   0  12  -4  108.99    2.90
   0 -12  -4  117.89    3.80
  -1 -12  -4   17.80    1.70
   1  12  -4   17.30    1.90
  -1  12   4   16.90    1.60
  -1  12   4   15.40    2.10
   1  12  -4   16.70    1.10
   1 -12  -4   17.30    1.50
   1  12   4   18.00    1.90
  -1  12  -4   16.60    1.00
  -1  12  -4   16.50    1.90
  -1  12  -4   15.90    1.30
  -2 -12  -4    7.70    1.50
  -2 -12  -4    7.60    1.20
  -2  12   4    5.40    1.30
   2  12  -4    7.20    1.30
   2  12  -4    5.60    0.80
  -2  12   4    7.90    1.20
   2 -12  -4    6.00    1.00
  -2  12  -4    7.00    1.40
  -2  12  -4    7.70    1.50
   2  12   4    5.20    1.20
  -3 -12  -4    2.30    0.80
   3  12  -4    2.20    0.70
   3  12  -4    1.30    0.80
  -3  12   4   -0.20    0.80
  -3 -12  -4    2.20    0.90
  -3  12   4    1.20    0.70
  -3  12   4    0.20    0.80
  -3  12  -4    1.20    0.90
   3  12   4    1.30    0.80
  -3  12  -4    1.60    0.90
   3 -12  -4    2.50    0.80
   4  12  -4   14.30    1.90
  -4  12   4   16.60    2.20
  -4 -12  -4   18.10    2.20
  -4  12   4   18.00    2.10
   4  12  -4   15.60    1.40
  -4  12   4   17.10    2.30
   4 -12  -4   13.30    1.30
   4  12   4   13.30    1.90
  -4  12  -4   14.00    2.10
  -4  12  -4   15.30    2.00
  -4  12  -4   16.50    1.40
  -5  12   4    2.60    1.20
   5  12  -4    1.90    0.90
  -5  12   4    2.40    1.10
  -5 -12  -4    2.10    0.80
  -5  12   4    1.30    0.80
  -5  12  -4    1.40    0.70
  -5  12  -4    1.60    1.00
  -5  12  -4    1.10    0.90
   5  12   4    2.60    1.10
   5 -12  -4    2.90    0.70
  -6 -12  -4   26.70    2.00
  -6  12   4   21.50    3.40
   6  12  -4   23.90    2.00
  -6  12   4   22.60    2.10
   6  12   4   22.90    2.40
  -6  12  -4   22.40    1.70
   6 -12  -4   21.40    1.60
  -6  12  -4   22.00    2.50
   0  13  -4   14.30    2.00
   0 -13  -4   21.50    1.70
   0  13   4   20.40    2.70
   0  13  -4   17.90    1.10
   0  13   4   17.90    1.70
  -1  13   4   77.29    4.10
   1  13  -4   89.09    4.10
   1  13  -4   78.09    2.50
  -1  13   4   82.39    3.50
  -1 -13  -4   80.49    3.30
  -1  13  -4   79.89    4.00
   1  13   4   81.49    4.10
   1 -13  -4   78.49    3.10
  -1  13  -4   74.89    2.90
   2  13  -4   20.40    1.40
  -2  13   4   22.40    1.80
  -2 -13  -4   15.90    1.60
   2  13  -4   14.60    1.90
  -2  13   4   19.80    2.20
  -2 -13  -4   19.80    2.10
  -2  13  -4   20.00    2.10
   2  13   4   19.80    2.20
   2 -13  -4   19.60    1.60
  -2  13  -4   19.60    2.50
  -2  13  -4   21.70    1.60
  -3  13   4   17.60    1.80
  -3 -13  -4   15.00    2.30
   3  13  -4   19.40    1.90
   3  13  -4   15.00    1.30
  -3  13   4   15.90    3.40
   3  13   4   13.80    2.10
  -3  13  -4   15.90    2.10
  -3  13  -4   13.70    1.40
   3 -13  -4   17.70    1.50
  -3  13  -4   17.70    2.60
  -4  13   4   18.20    2.70
  -4 -13  -4   22.40    1.80
  -4  13   4   20.20    2.60
  -4  13   4   26.30    2.20
   4  13  -4   18.80    1.90
  -4  13  -4   17.00    2.20
   4  13   4   15.30    2.10
  -4  13  -4   18.30    1.60
   4 -13  -4   19.80    1.60
  -4  13  -4   17.20    2.30
   0   0  -5    3.30    3.40
   0   0   5    2.20    3.30
  -1   0   5 1277.77   19.30
   1   0  -5 1282.17   19.00
   1   0  -5 1271.77   19.10
  -2   0   5 1818.62   26.70
  -2   0   5 1829.52   27.20
   2   0  -5 1841.72   27.30
  -3   0  -5   21.00    1.00
  -3   0   5   25.80    1.10
   3   0   5   21.10    0.90
  -3   0  -5   19.90    1.00
   3   0  -5   21.60    1.00
   3   0   5   19.70    0.80
   3   0  -5   19.90    1.00
   4   0   5  130.69    3.00
   4   0  -5  132.49    3.20
  -4   0  -5  125.29    3.20
  -4   0   5  141.89    3.40
   4   0   5  138.09    2.90
  -4   0   5  128.29    3.20
   4   0  -5  132.19    3.30
  -5   0   5  109.79    2.20
  -5   0   5  107.39    3.00
   5   0  -5  106.19    3.00
   5   0   5  110.49    2.70
  -5   0   5  101.79    3.00
   5   0  -5  105.89    3.10
  -5   0  -5  104.29    3.10
  -6   0  -5  106.49    3.00
   6   0   5  111.59    3.00
  -6   0   5  106.99    2.40
  -6   0   5  112.09    3.30
   6   0   5  104.09    3.00
   6   0  -5  106.59    3.30
   6   0  -5  103.29    3.10
  -6   0   5  108.09    3.30
  -6   0  -5  102.89    3.30
  -7   0  -5   13.90    1.30
   7   0  -5   14.90    1.30
   7   0   5   12.60    1.10
  -7   0   5   15.20    1.30
  -7   0   5   12.80    0.80
   7   0   5   13.60    1.00
  -7   0   5   14.80    1.30
  -7   0  -5   13.50    1.10
  -8   0  -5    3.30    0.90
  -8   0  -5    4.10    0.80
  -8   0   5    5.20    1.00
   8   0   5    3.30    0.80
   8   0  -5    2.40    0.90
  -8   0   5    2.70    0.70
   8   0   5    5.80    1.00
  -8   0   5    3.70    0.60
  -9   0  -5   29.50    2.10
  -9   0   5   25.40    1.90
  -9   0   5   26.60    1.40
   9   0  -5   22.90    1.70
  -9   0   5   25.50    1.90
   9   0  -5   24.30    1.80
   9   0   5   28.00    1.80
   9   0   5   24.30    1.60
  -9   0  -5   24.30    1.60
 -10   0  -5  313.97    8.20
 -10   0   5  312.97    6.40
  10   0   5  321.27    7.30
 -10   0   5  325.27    8.00
 -10   0   5  310.37    7.80
 -11   0   5   20.90    2.00
 -11   0   5   23.60    1.40
 -11   0   5   19.30    1.30
 -11   0  -5   19.10    1.90
 -11   0   5   20.30    2.00
 -12   0   5   68.19    3.50
 -12   0   5   61.79    2.40
 -12   0  -5   68.09    3.80
 -12   0   5   62.19    3.40
 -12   0   5   63.29    2.40
 -13   0   5   53.29    3.30
 -13   0  -5   54.79    3.50
 -13   0   5   53.39    2.30
 -13   0   5   53.99    2.60
 -13   0   5   54.59    3.40
   0  -1  -5 1277.97   46.90
   0  -1   5 1317.37   33.90
   0  -1   5 1410.86   32.90
  -1  -1  -5  665.93   10.60
  -1   1   5  657.93   10.40
   1  -1   5  667.43    9.90
   1   1  -5  655.43   10.20
  -1  -1  -5  660.13   10.30
  -1   1   5  644.54   10.20
  -1   1   5  640.24   10.20
   1   1  -5  638.44   10.10
   1  -1  -5  656.13   10.40
  -1   1  -5  659.53    9.80
   1  -1  -5  656.73   10.20
  -1  -1   5  628.64   10.10
   1  -1  -5  654.93   10.10
   1  -1  -5  641.14   10.30
   1   1   5  653.43   10.20
  -2   1   5  402.56    6.90
  -2   1   5  407.96    7.00
   2  -1   5  408.46    6.40
  -2   1   5  392.56    7.00
   2   1  -5  406.06    6.60
  -2  -1  -5  412.26    6.90
   2   1  -5  399.36    6.80
  -2  -1  -5  404.56    7.20
  -2   1   5  406.26    6.50
   2  -1  -5  406.76    6.80
   2   1   5  396.46    6.80
   2  -1  -5  411.66    6.60
   2  -1  -5  401.96    7.00
  -2  -1   5  403.76    6.90
   2  -1  -5  412.36    7.00
  -2   1  -5  410.06    6.50
  -3   1   5  245.98    4.30
  -3   1   5  243.88    4.80
  -3   1   5  250.17    4.90
   3   1  -5  241.98    4.80
   3  -1   5  243.38    4.10
   3  -1   5  240.88    4.30
  -3  -1  -5  246.48    4.80
   3   1  -5  245.78    4.60
   3  -1  -5  239.88    4.90
  -3  -1   5  243.08    4.40
   3  -1  -5  251.87    4.30
   3   1   5  250.17    4.60
   3  -1  -5  244.28    4.70
  -3   1  -5  245.58    4.20
   3   1   5  249.38    4.60
  -3   1  -5  242.78    4.70
  -3  -1   5  247.18    4.80
   3  -1  -5  250.67    5.00
   4   1  -5  237.38    4.80
   4   1  -5  226.98    4.70
   4  -1   5  228.18    4.40
  -4   1   5  232.38    4.20
  -4   1   5  231.88    4.90
  -4  -1  -5  225.98    4.90
  -4   1   5  223.48    4.80
   4  -1   5  231.28    4.20
   4  -1  -5  227.88    4.70
   4   1   5  225.68    4.50
  -4   1  -5  229.68    4.30
   4  -1  -5  228.78    4.20
  -4  -1   5  230.88    4.90
  -4   1  -5  237.08    4.80
  -4  -1   5  228.78    4.50
   4  -1  -5  232.88    4.90
   4   1   5  225.88    4.60
  -5   1   5   63.29    2.40
  -5  -1  -5   61.99    2.30
  -5   1   5   62.19    1.70
   5   1  -5   61.09    2.20
   5  -1   5   61.29    1.80
   5  -1   5   61.49    2.00
   5   1  -5   63.89    2.20
  -5   1   5   59.29    2.20
   5   1   5   62.89    2.00
   5  -1  -5   62.49    2.30
  -5   1  -5   61.59    2.20
  -5   1  -5   62.29    1.90
  -5  -1   5   59.09    2.20
   5   1   5   59.79    2.00
  -5  -1   5   60.69    2.10
   5  -1  -5   61.29    2.10
  -6  -1  -5  360.66    7.60
   6  -1   5  372.56    7.10
  -6   1   5  362.56    7.60
   6   1  -5  368.06    7.50
  -6   1   5  371.06    6.60
  -6   1   5  373.06    7.60
   6   1  -5  378.86    7.50
   6  -1   5  383.36    6.90
   6  -1  -5  371.56    7.40
   6  -1  -5  382.86    7.80
  -6   1  -5  367.06    7.60
   6   1   5  381.66    7.30
  -6  -1   5  367.26    7.60
  -6   1  -5  380.26    7.00
   6   1   5  372.36    7.30
  -6  -1   5  372.46    6.10
  -6  -1   5  372.36    6.10
  -7   1   5  182.98    4.90
  -7   1   5  182.48    4.90
   7   1  -5  178.98    4.80
   7  -1   5  190.98    4.50
   7   1  -5  175.28    4.70
  -7   1   5  183.58    4.00
  -7  -1  -5  177.78    4.90
   7  -1   5  191.28    4.30
  -7  -1   5  184.98    4.70
   7   1   5  182.18    4.60
  -7  -1   5  185.38    3.60
   7   1   5  191.68    4.60
  -7  -1   5  181.28    4.90
   7  -1  -5  182.98    4.70
  -7   1  -5  186.88    4.40
  -7   1  -5  187.88    5.00
  -7  -1   5  186.78    3.60
   7  -1  -5  185.18    5.00
  -8   1   5   71.39    3.00
   8  -1   5   72.09    2.50
   8   1  -5   70.49    2.90
   8   1  -5   70.29    3.20
   8  -1   5   75.69    2.80
  -8   1   5   72.99    2.30
  -8  -1  -5   71.49    3.10
   8   1   5   71.69    2.70
  -8   1  -5   70.19    3.00
  -8  -1   5   69.59    2.80
   8  -1  -5   65.69    3.10
  -8  -1   5   70.89    3.00
   8   1   5   70.79    2.70
  -8  -1   5   69.79    2.00
  -8  -1   5   70.19    2.00
  -8   1  -5   71.49    2.60
  -9   1   5    7.70    1.30
   9   1  -5    6.90    1.20
   9  -1   5    7.80    1.10
  -9   1   5    6.70    1.20
   9   1  -5    8.00    1.30
  -9  -1  -5    6.80    1.20
  -9   1   5    7.80    0.90
   9  -1   5    9.30    1.30
   9   1   5    7.10    1.00
  -9  -1   5    6.80    0.80
   9  -1  -5    7.30    1.40
   9  -1  -5    8.30    1.20
  -9  -1   5    6.30    1.10
  -9   1  -5    8.60    1.10
  -9   1  -5    7.50    1.30
   9   1   5    6.10    1.00
  -9  -1   5    7.50    0.80
  -9  -1   5    6.20    1.20
 -10   1   5  104.99    3.10
  10  -1   5  104.29    3.50
 -10  -1  -5  101.49    3.80
 -10  -1  -5  100.29    4.10
 -10   1   5   96.79    4.10
 -10   1   5  102.29    4.10
 -10   1  -5  110.69    4.40
 -10  -1   5  105.19    4.00
 -10   1  -5  103.59    3.70
 -10  -1   5  106.19    4.10
  10   1   5  106.29    3.70
 -10  -1   5  102.99    2.80
 -10  -1   5  102.09    2.90
 -11   1   5   43.30    2.70
 -11   1   5   38.70    2.60
 -11  -1  -5   36.20    2.60
 -11   1   5   36.50    1.90
 -11  -1   5   42.40    2.70
 -11  -1   5   42.00    1.80
 -11  -1   5   39.50    1.70
 -11   1  -5   37.70    2.70
 -11  -1   5   40.20    2.60
 -12   1   5   19.40    2.10
 -12   1   5   19.50    1.50
 -12  -1  -5   16.60    2.30
 -12   1   5   16.40    2.10
 -12  -1   5   20.90    2.00
 -12   1  -5   19.50    2.50
 -12  -1   5   19.00    2.00
 -12  -1   5   18.70    1.30
 -12  -1   5   14.90    1.30
 -12   1  -5   16.70    1.70
 -13   1   5    4.40    1.00
 -13   1   5    6.10    1.40
 -13  -1  -5    5.80    1.50
 -13   1   5    5.30    1.10
 -13   1   5    5.00    1.40
 -13  -1   5    4.90    1.30
 -13  -1   5    5.40    1.30
 -13   1  -5    6.40    1.40
 -13  -1   5    5.50    0.90
 -13   1  -5    6.70    1.50
   0   2   5 1148.79   17.60
   0  -2  -5 1155.88   17.90
   0   2   5 1127.29   17.80
   0   2  -5 1157.78   17.00
   0  -2  -5 1116.89   17.80
   0  -2  -5 1146.19   17.60
   0   2  -5 1206.68   17.00
  -1   2   5   25.90    1.20
   1   2  -5   27.10    0.90
   1   2  -5   23.90    0.90
   1  -2   5   26.30    0.60
  -1   2   5   26.10    1.10
  -1   2   5   26.10    1.00
  -1  -2  -5   26.20    1.00
   1  -2  -5   25.30    1.20
   1  -2  -5   27.10    1.10
   1   2   5   27.20    1.20
  -1  -2   5   26.00    0.90
   1  -2  -5   26.20    1.10
   1   2   5   25.90    1.00
   2   2  -5  119.99    2.10
   2   2  -5  118.89    2.30
   2  -2   5  124.09    2.10
  -2   2   5  116.69    2.80
   2   2  -5  119.29    2.70
  -2  -2  -5  117.19    2.90
  -2   2   5  117.29    2.60
  -2   2   5  112.69    2.90
  -2  -2  -5  116.19    2.70
  -2   2   5  115.49    2.70
   2  -2  -5  113.29    2.90
   2  -2  -5  116.29    2.50
  -2  -2   5  113.69    2.60
   2   2   5  109.99    2.60
  -2   2  -5  114.29    2.30
   2  -2  -5  113.49    2.60
  -3  -2  -5   67.19    2.10
   3   2  -5   68.09    1.80
  -3  -2  -5   66.69    2.20
  -3   2   5   65.99    1.80
  -3   2   5   69.39    2.20
   3  -2   5   68.59    1.60
   3   2  -5   69.79    2.00
   3  -2   5   68.49    1.40
  -3   2  -5   68.59    1.90
   3  -2  -5   69.49    2.10
  -3   2  -5   69.09    1.50
   3   2   5   66.79    2.00
   3  -2  -5   66.49    1.90
   3  -2  -5   70.59    2.00
  -3  -2   5   68.79    2.10
   3  -2  -5   66.19    2.20
  -4  -2  -5  307.17    6.10
   4  -2   5  306.57    5.20
   4  -2   5  317.27    5.50
  -4   2   5  298.17    6.20
  -4  -2  -5  301.57    6.40
  -4   2   5  308.27    5.60
   4   2  -5  304.47    5.80
  -4   2   5  310.97    6.10
   4   2  -5  313.37    6.10
  -4   2  -5  312.17    5.30
   4   2   5  315.37    6.00
   4   2   5  307.77    5.90
   4  -2  -5  299.77    6.20
   4  -2  -5  309.57    5.90
  -4  -2   5  306.97    5.50
   4  -2  -5  306.67    6.30
  -4  -2   5  312.27    6.20
   4  -2  -5  306.57    5.70
  -4   2  -5  301.37    5.90
   5   2  -5  221.08    5.00
  -5  -2  -5  225.18    5.20
   5  -2   5  228.58    4.30
  -5   2   5  225.18    4.50
  -5   2   5  217.88    5.20
  -5  -2  -5  216.28    5.10
   5  -2   5  224.68    4.50
   5   2   5  217.48    4.80
   5  -2  -5  223.58    4.90
   5   2   5  226.58    5.40
  -5  -2   5  227.48    5.10
   5  -2  -5  216.98    5.20
  -5   2  -5  229.08    5.10
  -5  -2   5  225.18    4.60
  -5   2  -5  227.28    4.40
  -6  -2  -5  115.59    3.60
   6   2  -5  116.39    3.50
   6  -2   5  114.39    2.80
   6  -2   5  116.59    3.20
  -6  -2  -5  117.69    3.60
   6   2  -5  115.79    3.40
  -6   2   5  119.19    3.00
  -6   2   5  107.99    3.50
  -6  -2   5  120.19    3.60
  -6   2  -5  112.59    3.50
   6  -2  -5  112.49    3.40
   6   2   5  119.09    3.30
   6   2   5  117.89    3.30
   6  -2  -5  113.69    3.20
   6  -2  -5  109.89    3.50
  -6   2  -5  115.89    3.00
  -6  -2   5  117.39    3.20
   7   2  -5   79.99    2.90
   7  -2   5   72.29    2.60
   7  -2   5   78.99    2.40
   7   2  -5   76.99    2.80
  -7   2   5   75.99    2.90
  -7   2   5   74.19    3.00
  -7  -2  -5   78.29    3.10
  -7  -2  -5   76.09    2.90
  -7   2   5   76.69    2.40
   7   2   5   73.19    2.70
  -7   2  -5   76.69    2.50
  -7  -2   5   75.39    2.90
   7   2   5   76.59    2.70
  -7   2  -5   73.09    2.90
   7  -2  -5   77.39    2.70
  -7  -2   5   76.99    2.70
  -7  -2   5   77.09    1.80
   7  -2  -5   76.09    3.00
   8   2  -5  197.38    5.30
  -8   2   5  188.18    4.60
  -8  -2  -5  192.38    5.30
  -8   2   5  195.08    5.40
  -8   2   5  195.38    5.50
   8  -2   5  192.68    4.60
   8  -2   5  192.38    5.00
  -8  -2  -5  191.78    5.50
   8   2  -5  192.48    5.20
  -8   2  -5  188.68    4.70
  -8  -2   5  183.98    3.80
   8   2   5  191.58    5.00
  -8  -2   5  182.98    5.20
  -8  -2   5  191.98    3.70
   8  -2  -5  195.48    5.40
  -8  -2   5  180.68    4.90
  -8   2  -5  188.88    5.40
   8  -2  -5  204.68    5.10
   8   2   5  192.38    5.10
  -9   2   5    8.80    1.00
  -9   2   5   10.00    1.50
   9  -2   5   10.20    1.10
  -9  -2  -5    8.90    1.40
  -9  -2  -5   10.50    1.40
   9  -2   5    7.80    1.00
   9  -2   5    9.70    1.30
  -9   2   5   10.10    1.60
   9   2  -5   11.00    1.50
  -9  -2   5    9.50    1.40
   9  -2  -5   11.40    1.60
   9   2   5    9.40    1.20
  -9  -2   5   10.80    0.80
  -9  -2   5   10.90    0.80
  -9  -2   5    9.40    1.40
  -9   2  -5   12.90    1.20
   9   2   5   10.10    1.30
  -9   2  -5   10.40    1.60
 -10   2   5  161.58    5.30
 -10  -2  -5  158.68    5.10
 -10   2   5  162.28    5.30
 -10  -2  -5  164.08    5.50
 -10   2   5  165.48    4.40
  10  -2   5  156.58    5.00
  10  -2   5  157.28    4.70
 -10   2  -5  160.48    4.70
 -10  -2   5  163.08    5.00
 -10  -2   5  160.38    3.60
 -10  -2   5  156.18    5.20
 -10   2  -5  167.18    5.50
 -10  -2   5  157.48    3.70
 -11   2   5   32.50    2.50
 -11  -2  -5   31.10    2.50
 -11   2   5   35.30    2.50
 -11   2   5   33.00    1.80
 -11   2  -5   30.20    2.40
 -11   2  -5   35.90    2.60
 -11   2  -5   33.40    2.20
 -11  -2   5   32.20    1.50
 -11  -2   5   30.80    1.50
 -11  -2   5   31.20    2.40
 -12   2   5    1.80    0.70
 -12  -2  -5    0.90    0.90
 -12   2   5    1.60    0.80
 -12   2   5    0.50    0.80
 -12  -2   5    1.00    0.60
 -12  -2   5    1.40    0.80
 -12   2  -5    0.20    0.80
 -12  -2   5    1.50    0.90
 -12   2  -5    1.30    0.70
 -12   2  -5    3.10    1.00
 -13   2   5   37.40    3.00
 -13   2   5   32.90    2.70
 -13   2   5   34.50    2.10
 -13  -2  -5   34.80    2.90
 -13   2  -5   36.50    2.90
 -13   2  -5   31.50    2.30
 -13  -2   5   37.50    2.90
 -13  -2   5   34.50    2.70
 -13   2  -5   31.80    2.70
   0   3   5   65.89    2.00
   0   3  -5   65.79    1.90
   0  -3  -5   66.59    2.10
   0  -3  -5   66.39    2.00
   0  -3  -5   67.59    1.90
   0   3  -5   66.59    1.50
   0   3   5   67.39    1.90
   1   3  -5  273.97    5.00
   1   3  -5  269.87    4.90
  -1   3   5  275.77    5.30
  -1  -3  -5  278.57    5.10
  -1   3   5  270.77    5.50
  -1  -3  -5  283.07    5.50
  -1   3   5  273.17    5.20
   1  -3  -5  267.77    5.00
   1  -3  -5  269.37    5.40
  -1  -3   5  268.97    4.90
   1   3   5  279.47    5.40
   1   3   5  267.67    5.00
   1  -3  -5  273.87    5.20
  -1   3  -5  267.17    5.40
  -2   3   5  919.31   15.10
  -2  -3  -5  915.91   14.70
  -2   3   5  912.71   14.60
  -2  -3  -5  940.11   15.10
   2   3  -5  938.61   14.10
   2   3  -5  950.40   13.90
   2   3  -5  916.61   14.60
  -2   3   5  901.71   14.70
  -2   3   5  907.51   14.80
   2   3   5  916.71   14.70
   2  -3  -5  919.71   14.90
  -2   3  -5  958.20   14.30
  -2   3  -5  936.11   15.40
  -2   3  -5  933.51   13.90
   2   3   5  950.20   15.30
  -2  -3   5  930.51   14.40
   2  -3  -5  934.51   14.90
   2  -3  -5  953.80   14.70
   2  -3  -5  920.71   15.20
  -2  -3   5  932.51   14.70
   3   3  -5   23.80    1.00
   3  -3   5   24.50    0.80
   3  -3   5   22.10    0.70
  -3   3   5   21.50    1.40
  -3   3   5   22.10    1.20
   3   3  -5   23.50    1.20
  -3   3   5   22.50    1.30
   3   3  -5   22.90    0.80
  -3  -3  -5   21.80    1.20
  -3   3   5   22.70    1.20
  -3  -3   5   23.20    1.20
  -3   3  -5   24.00    1.40
  -3   3  -5   24.60    1.10
   3   3   5   22.50    1.40
  -3   3  -5   22.80    0.80
   3  -3  -5   22.50    1.20
   3   3   5   23.80    1.40
   3  -3  -5   21.80    1.10
  -3  -3   5   24.10    0.80
  -4   3   5   88.29    2.60
   4   3  -5   88.69    2.40
   4  -3   5   85.39    1.90
  -4  -3  -5   85.99    2.70
   4   3  -5   86.49    2.60
  -4   3   5   86.79    2.80
  -4  -3  -5   83.29    2.70
  -4   3   5   84.09    2.50
  -4  -3   5   88.99    2.10
   4  -3  -5   88.99    2.80
  -4  -3   5   89.69    2.70
   4  -3  -5   86.59    2.60
   4   3   5   88.09    2.50
   4  -3  -5   87.69    2.50
  -4   3  -5   87.69    2.00
  -4  -3   5   86.79    1.80
  -4   3  -5   84.19    2.50
   4  -3  -5   86.59    2.50
   5  -3   5  112.79    2.50
   5  -3   5  111.49    2.90
  -5   3   5  113.99    3.00
  -5   3   5  117.09    3.50
  -5  -3  -5  114.39    3.40
  -5   3   5  113.59    3.30
  -5  -3  -5  111.89    3.40
   5   3  -5  117.39    3.60
   5   3  -5  115.69    3.30
   5  -3  -5  111.69    3.40
  -5  -3   5  108.99    2.70
   5   3   5  108.29    3.10
  -5  -3   5  114.09    3.30
  -5   3  -5  113.49    3.20
   5  -3  -5  110.09    3.00
  -5   3  -5  108.99    2.60
   5  -3  -5  110.49    3.20
   5  -3  -5  110.29    3.10
   5   3   5  114.79    3.20
   6   3  -5  116.49    3.50
  -6   3   5  121.59    3.60
  -6   3   5  114.69    3.20
   6   3  -5  113.59    3.40
  -6  -3  -5  113.99    3.60
  -6   3   5  121.49    3.80
  -6  -3  -5  114.99    3.60
   6  -3   5  118.29    3.20
   6  -3   5  118.59    2.80
  -6  -3   5  116.69    3.10
   6  -3  -5  119.99    3.30
   6  -3  -5  121.79    3.60
   6   3   5  117.89    3.50
  -6   3  -5  116.69    3.00
   6   3   5  120.19    3.40
  -6   3  -5  114.59    3.60
  -6  -3   5  123.59    3.70
   6  -3  -5  119.79    3.70
   7  -3   5   47.90    1.80
   7   3  -5   45.20    2.20
  -7  -3  -5   46.90    2.40
  -7  -3  -5   46.00    2.20
  -7   3   5   45.00    2.20
   7  -3   5   47.80    2.10
  -7   3   5   40.30    2.30
   7   3  -5   47.40    2.20
  -7   3   5   47.50    2.00
   7  -3  -5   47.10    2.40
  -7   3  -5   48.30    2.40
   7   3   5   45.70    2.10
   7   3   5   46.30    2.20
  -7  -3   5   55.39    2.50
  -7  -3   5   48.40    1.40
   7  -3  -5   47.90    2.10
  -7   3  -5   46.50    1.90
  -7  -3   5   46.10    2.00
   7  -3  -5   45.40    2.20
  -8   3   5  100.29    3.60
   8  -3   5   96.19    3.30
   8   3  -5   97.59    4.00
   8   3  -5  105.29    3.70
  -8  -3  -5  101.29    3.80
  -8   3   5   95.49    3.80
  -8   3   5   97.09    3.20
  -8  -3  -5  102.49    3.60
   8  -3   5  103.19    3.00
  -8  -3   5   96.89    3.60
  -8  -3   5   94.49    3.20
   8   3   5  103.69    3.50
   8  -3  -5  101.89    3.60
   8  -3  -5  102.99    3.40
  -8   3  -5  101.49    3.10
   8   3   5   97.29    3.40
  -8   3  -5   93.49    3.80
  -8   3  -5   95.19    3.60
   8  -3  -5   98.99    3.70
  -9   3   5    9.40    1.60
   9   3  -5   12.50    1.70
  -9   3   5   11.60    1.60
  -9  -3  -5   10.10    1.40
  -9  -3  -5   10.60    1.60
   9  -3   5   12.00    1.40
   9  -3   5   10.10    1.10
  -9   3   5   11.10    1.20
  -9  -3   5   11.30    1.60
  -9  -3   5   10.20    0.80
  -9   3  -5    8.90    1.50
  -9   3  -5   11.70    1.10
  -9   3  -5   12.00    1.70
   9   3   5   11.70    1.40
  -9  -3   5   12.60    1.50
   9  -3  -5   10.30    1.50
 -10   3   5   78.29    3.00
 -10   3   5   75.69    3.50
 -10   3   5   75.29    3.60
 -10  -3  -5   76.89    3.60
 -10  -3  -5   71.19    3.50
 -10   3  -5   69.09    3.40
 -10  -3   5   71.69    3.10
 -10  -3   5   79.39    3.60
 -10  -3   5   75.19    2.20
  10  -3  -5   69.29    3.30
 -10   3  -5   68.09    3.50
 -10  -3   5   73.19    2.10
 -10   3  -5   70.89    2.90
 -11   3   5   30.60    2.30
 -11   3   5   29.50    1.90
 -11   3   5   29.80    2.50
 -11  -3  -5   29.90    2.40
 -11   3  -5   29.40    2.40
 -11  -3   5   26.90    2.00
 -11  -3   5   29.40    1.40
  11  -3  -5   26.70    2.20
 -11  -3   5   27.30    2.30
 -11   3  -5   25.20    2.20
 -11   3  -5   31.10    2.00
 -12   3   5   45.00    2.90
 -12   3   5   51.09    3.30
 -12  -3  -5   47.80    3.20
 -12   3   5   45.00    2.40
 -12  -3   5   47.90    3.10
 -12   3  -5   53.79    3.30
  12  -3  -5   46.80    2.90
 -12   3  -5   42.20    3.00
 -12   3  -5   45.30    2.60
 -12  -3   5   47.30    2.70
   0  -4  -5  400.06    7.50
   0   4   5  407.66    7.60
   0  -4   5  408.66    7.40
   0  -4  -5  400.86    7.60
   0   4   5  405.56    7.20
   0   4  -5  403.46    7.40
   0  -4  -5  396.46    7.10
  -1   4   5   57.09    1.80
  -1  -4  -5   57.99    2.20
   1   4  -5   54.49    1.80
  -1   4   5   56.29    2.00
  -1   4   5   55.09    1.80
  -1  -4  -5   58.49    2.10
  -1  -4  -5   56.99    1.80
   1   4  -5   57.29    1.70
  -1  -4   5   60.49    1.90
   1  -4  -5   56.59    2.00
   1  -4  -5   56.99    1.80
   1   4   5   56.09    1.80
  -1   4  -5   55.69    2.10
   2   4  -5  302.67    5.10
   2   4  -5  304.47    5.50
   2   4  -5  309.07    5.80
  -2   4   5  303.27    6.30
  -2  -4  -5  304.17    5.80
  -2   4   5  296.17    6.20
  -2   4   5  302.87    6.00
  -2  -4  -5  300.47    6.10
  -2   4   5  289.77    5.90
   2  -4  -5  297.77    5.70
  -2   4  -5  300.07    5.30
  -2   4  -5  303.57    6.30
  -2   4  -5  303.17    4.90
   2  -4  -5  293.27    6.20
   2   4   5  299.57    6.20
  -2  -4   5  301.67    5.50
   2  -4  -5  291.97    6.00
   2   4   5  309.47    5.70
  -3   4   5  204.38    4.40
  -3   4   5  194.68    4.40
   3   4  -5  201.28    4.40
   3   4  -5  196.98    3.90
  -3   4   5  196.88    4.80
  -3  -4  -5  194.98    4.40
  -3   4   5  194.38    4.40
   3   4  -5  205.48    3.80
  -3  -4  -5  189.48    4.60
   3  -4  -5  200.48    4.80
   3   4   5  205.08    4.90
  -3   4  -5  207.78    4.20
   3  -4  -5  202.88    4.60
  -3  -4   5  201.98    3.90
   3   4   5  207.98    4.40
  -3   4  -5  195.68    3.60
   3  -4  -5  200.78    4.20
  -3   4  -5  201.18    4.90
  -4   4   5  109.79    3.40
   4   4  -5  105.99    3.10
  -4  -4  -5  107.59    3.20
   4   4  -5  106.19    2.70
   4  -4   5  107.89    2.50
  -4   4   5  110.19    3.10
   4  -4   5  108.89    2.20
  -4  -4  -5  107.49    3.20
   4   4  -5  108.29    2.40
  -4   4   5  102.29    3.00
   4  -4  -5  107.09    2.80
   4  -4  -5  108.69    3.30
   4  -4  -5  106.89    3.00
  -4   4  -5  108.39    2.40
   4  -4  -5  108.29    3.20
  -4   4  -5  110.69    3.50
   4   4   5  106.99    2.90
   4   4   5  102.99    3.30
  -4  -4   5  110.69    2.40
  -4   4  -5  109.29    3.00
  -5  -4  -5  381.86    7.90
  -5  -4  -5  385.76    7.90
   5  -4   5  383.66    6.50
  -5   4   5  372.96    8.00
  -5   4   5  391.16    7.70
  -5   4   5  374.76    7.60
   5   4  -5  394.86    7.40
   5   4  -5  384.86    7.80
   5  -4   5  393.76    7.00
  -5  -4   5  384.56    6.80
  -5   4  -5  384.66    8.30
  -5  -4   5  391.46    6.50
  -5   4  -5  381.76    6.80
   5  -4  -5  391.96    7.70
   5  -4  -5  386.86    7.60
  -5  -4   5  381.96    7.80
   5  -4  -5  380.96    8.00
   5  -4  -5  387.06    7.30
  -5   4  -5  389.06    7.70
   5   4   5  393.16    7.80
   5   4   5  381.16    7.50
   6   4  -5   14.40    1.20
   6   4  -5   14.80    1.20
  -6  -4  -5   12.50    1.30
   6  -4   5   14.30    0.80
  -6   4   5   13.20    1.40
  -6  -4  -5   13.30    1.20
  -6   4   5   14.70    1.20
   6  -4   5   14.20    1.10
  -6   4   5   13.90    1.20
   6  -4  -5   13.90    1.30
   6  -4  -5   12.90    1.10
   6   4   5   13.10    1.10
   6  -4  -5   16.40    1.30
  -6  -4   5   17.90    1.40
  -6  -4   5   16.70    1.10
  -6  -4   5   16.00    0.80
  -6   4  -5   17.90    1.40
   6   4   5   16.10    1.30
  -6   4  -5   14.70    1.00
   6  -4  -5   15.10    1.30
  -6   4  -5   16.70    1.50
   7   4  -5  105.39    3.70
  -7   4   5   99.49    3.70
   7  -4   5  101.69    3.10
  -7  -4  -5   96.19    3.40
  -7  -4  -5   99.49    3.60
  -7   4   5  102.09    3.50
   7  -4   5   94.39    2.60
  -7   4   5   94.99    3.20
   7   4  -5   97.39    3.30
   7  -4  -5  101.69    3.90
   7  -4  -5   99.19    3.10
   7   4   5   97.69    3.40
  -7   4  -5  101.49    2.90
  -7  -4   5   99.29    3.60
  -7   4  -5   98.29    3.80
  -7  -4   5  100.89    3.20
   7  -4  -5   95.19    3.30
  -7   4  -5  100.39    3.50
  -7  -4   5  102.29    2.40
   7   4   5   98.49    3.40
   8   4  -5  281.67    7.00
   8  -4   5  292.27    6.50
  -8   4   5  298.07    6.70
  -8   4   5  293.77    7.40
  -8  -4  -5  290.37    7.30
  -8  -4  -5  303.47    7.20
  -8   4   5  293.17    7.10
   8  -4   5  293.07    5.90
   8   4  -5  288.27    7.10
  -8  -4   5  295.57    6.40
  -8  -4   5  282.67    7.10
   8  -4  -5  287.27    6.50
   8  -4  -5  291.37    7.30
  -8   4  -5  293.47    6.30
  -8   4  -5  287.77    7.60
   8   4   5  287.77    6.80
   8   4   5  303.37    7.10
  -8  -4   5  290.37    5.30
   8  -4  -5  296.97    7.00
  -8   4  -5  289.67    7.20
  -9   4   5   43.60    2.70
  -9  -4  -5   43.60    2.40
  -9   4   5   40.00    2.40
  -9   4   5   42.50    2.20
   9  -4   5   37.90    2.10
  -9  -4  -5   42.50    2.70
   9  -4   5   39.50    1.80
   9  -4  -5   39.50    2.30
  -9  -4   5   43.20    2.50
  -9   4  -5   39.70    2.00
  -9  -4   5   38.90    1.50
  -9   4  -5   36.40    2.50
  -9   4  -5   37.40    2.80
  -9  -4   5   40.30    2.10
 -10   4   5   17.10    1.70
 -10   4   5   14.60    2.00
  10  -4   5   14.00    1.30
 -10  -4  -5   15.40    2.00
 -10   4   5   15.10    1.50
 -10   4  -5   15.30    1.70
 -10  -4   5   15.40    1.90
 -10  -4   5   14.30    1.40
 -10   4  -5   14.80    2.10
 -10  -4   5   12.90    0.90
  10  -4  -5   13.60    1.50
 -10   4  -5   14.70    1.40
 -11   4   5   26.50    2.40
 -11   4   5   26.80    2.00
 -11  -4  -5   27.20    2.30
 -11   4   5   28.00    2.30
 -11   4  -5   25.10    1.90
 -11   4  -5   24.70    2.20
  11  -4  -5   27.90    2.20
 -11  -4   5   29.30    2.00
 -11   4  -5   27.00    2.40
 -12  -4  -5   24.60    2.50
 -12   4   5   26.80    2.60
 -12   4   5   24.50    1.90
 -12   4   5   20.30    2.10
 -12  -4   5   27.10    2.10
 -12   4  -5   22.80    1.90
 -12   4  -5   23.10    2.40
  12  -4  -5   23.90    2.10
 -12   4  -5   24.90    2.50
   0   5  -5   22.30    0.90
   0  -5  -5   23.50    1.40
   0   5   5   24.20    1.50
   0  -5  -5   22.40    1.40
   0  -5   5   23.70    1.40
   0  -5  -5   24.30    1.40
   0   5  -5   24.90    1.30
  -1   5   5   18.10    1.10
   1   5  -5   15.40    0.80
  -1   5   5   18.20    1.00
   1  -5   5   16.00    1.20
  -1  -5  -5   18.00    1.20
  -1   5   5   17.00    1.30
   1   5  -5   16.20    1.00
  -1  -5  -5   16.00    1.20
  -1  -5  -5   16.60    1.00
  -1   5   5   16.90    1.20
   1   5  -5   16.00    0.70
   1   5  -5   15.80    0.90
   1   5   5   14.60    1.20
   1   5   5   17.70    1.00
  -1  -5   5   16.00    1.00
  -1   5  -5   13.80    1.10
  -1   5  -5   16.60    0.80
   1  -5  -5   17.00    1.20
   1  -5  -5   16.00    1.20
   1  -5  -5   17.60    1.20
  -2   5   5  551.14   10.30
   2   5  -5  560.24    9.30
  -2  -5  -5  578.84   10.40
   2   5  -5  572.64    9.90
   2   5  -5  571.74    9.70
  -2  -5  -5  581.24   10.50
   2   5  -5  578.34    9.20
  -2   5   5  574.34    9.90
  -2   5   5  565.64   10.60
  -2  -5  -5  559.14   10.00
  -2   5   5  565.54    9.90
   2  -5  -5  567.34   10.40
  -2   5  -5  566.84    9.40
   2  -5  -5  573.84    9.80
  -2   5  -5  570.54   10.50
   2   5   5  562.34    9.80
  -2  -5   5  565.84    9.80
   2   5   5  554.64   10.40
   2  -5  -5  560.44   10.30
  -2   5  -5  576.64    9.00
   3   5  -5    2.90    0.60
  -3   5   5    2.70    0.70
   3   5  -5    2.50    0.40
  -3   5   5    2.50    0.50
  -3   5   5    3.80    0.90
  -3  -5  -5    2.70    0.50
   3   5  -5    2.80    0.50
  -3   5   5    3.00    0.50
  -3  -5  -5    3.20    0.60
  -3   5  -5    2.80    0.60
   3  -5  -5    3.10    0.70
   3   5   5    3.30    0.70
   3   5   5    3.00    0.60
  -3   5  -5    2.50    0.60
   3  -5  -5    3.20    0.70
  -3  -5   5    1.40    0.40
  -3   5  -5    2.90    0.40
   3  -5  -5    2.70    0.50
  -4   5   5  154.18    4.00
   4  -5   5  159.98    3.30
  -4  -5  -5  162.88    4.30
   4   5  -5  162.68    4.20
  -4   5   5  158.88    4.50
  -4  -5  -5  151.98    4.10
   4  -5   5  156.38    3.00
   4   5  -5  163.48    3.70
   4   5  -5  159.48    3.50
  -4   5   5  154.38    4.20
   4  -5  -5  156.68    3.70
   4   5   5  155.58    4.40
  -4   5  -5  158.98    3.30
   4  -5  -5  154.18    3.90
   4  -5  -5  158.28    4.30
  -4   5  -5  154.18    4.50
   4   5   5  156.58    3.90
  -4  -5   5  161.08    3.50
   4  -5  -5  154.68    4.30
   5   5  -5   46.40    1.90
  -5  -5  -5   48.00    2.20
   5   5  -5   47.40    1.60
   5  -5   5   46.30    1.50
  -5   5   5   47.30    2.40
   5   5  -5   48.90    2.20
  -5   5   5   44.30    2.10
  -5  -5  -5   48.00    2.20
  -5   5   5   47.50    2.10
   5  -5   5   45.60    1.70
  -5   5  -5   46.00    2.10
  -5  -5   5   46.60    1.60
  -5   5  -5   45.80    1.60
   5   5   5   45.00    1.90
  -5   5  -5   43.00    2.30
   5  -5  -5   45.60    2.00
   5   5   5   45.60    2.20
   5  -5  -5   44.20    2.20
   5  -5  -5   46.10    2.10
   5  -5  -5   48.30    1.90
  -6   5   5  463.35    9.70
  -6   5   5  465.05    9.30
   6   5  -5  455.95    9.30
  -6  -5  -5  451.85    9.20
  -6   5   5  456.25    9.10
   6   5  -5  464.75    8.90
   6  -5   5  462.95    8.40
  -6  -5  -5  441.46    9.30
   6  -5   5  455.15    7.90
  -6   5  -5  451.65    8.30
  -6  -5   5  458.05    8.10
   6  -5  -5  451.25    9.20
   6   5   5  456.65    8.90
   6  -5  -5  462.75    9.00
  -6  -5   5  471.75    8.00
   6  -5  -5  458.15    8.60
   6  -5  -5  446.56    9.50
  -6   5  -5  441.96    9.20
   6   5   5  468.25    9.40
  -6   5  -5  453.85    9.80
  -7   5   5   29.70    1.90
   7   5  -5   26.90    1.80
  -7  -5  -5   28.00    2.00
  -7  -5  -5   31.30    2.00
   7   5  -5   26.70    1.70
   7  -5   5   28.10    1.30
  -7   5   5   27.30    1.90
  -7   5   5   31.10    2.20
   7  -5   5   30.10    1.60
   7  -5  -5   27.20    1.90
   7  -5  -5   30.30    1.70
  -7  -5   5   30.20    1.50
   7   5   5   29.80    1.80
  -7  -5   5   32.40    1.30
   7  -5  -5   29.60    1.80
  -7   5  -5   27.70    1.50
   7   5   5   28.40    1.90
  -7   5  -5   31.20    2.20
  -7   5  -5   27.30    1.90
   8   5  -5  140.39    4.40
  -8   5   5  144.29    4.40
   8  -5   5  138.29    3.50
  -8  -5  -5  143.79    4.50
  -8   5   5  139.09    4.90
  -8  -5  -5  140.49    4.70
  -8   5   5  147.49    4.70
   8  -5   5  146.29    4.10
  -8  -5   5  137.59    3.20
   8   5   5  137.19    4.50
   8  -5  -5  136.09    4.20
  -8   5  -5  142.59    3.90
  -8   5  -5  145.79    5.00
   8  -5  -5  142.29    4.40
  -8   5  -5  142.69    4.70
  -8  -5   5  140.99    3.90
  -9  -5  -5    6.50    1.30
  -9   5   5    5.80    1.10
  -9  -5  -5    6.20    1.10
   9  -5   5    7.40    0.90
  -9   5   5    8.50    1.40
  -9   5   5    5.10    1.30
   9  -5   5    6.80    1.10
  -9   5  -5    7.20    1.40
  -9  -5   5    7.10    1.10
  -9  -5   5    6.60    0.70
  -9   5  -5    8.80    1.50
   9  -5  -5    8.00    1.50
  -9   5  -5    7.50    1.10
 -10  -5  -5  229.28    6.80
 -10   5   5  219.08    6.50
 -10   5   5  205.68    6.60
 -10   5   5  221.98    6.00
  10  -5   5  216.48    5.10
 -10   5  -5  209.88    5.60
 -10   5  -5  212.28    6.60
 -10  -5   5  219.28    5.60
 -10  -5   5  216.48    4.50
  10  -5  -5  215.38    6.10
 -10   5  -5  207.88    6.70
 -11   5   5    3.30    0.80
 -11   5   5    3.50    1.10
 -11   5   5    2.00    0.80
 -11  -5  -5    4.90    1.30
 -11   5  -5    2.90    1.00
 -11  -5   5    2.50    0.80
  11  -5  -5    2.80    0.90
 -11   5  -5    2.40    1.00
 -12   5   5   41.30    5.50
 -12   5   5   51.69    3.70
 -12  -5  -5   49.90    3.30
 -12   5   5   54.49    2.90
 -12   5  -5   55.99    2.90
 -12   5  -5   55.99    3.50
 -12   5  -5   50.79    3.30
  12  -5  -5   59.89    3.30
 -12  -5   5   49.99    2.80
   0  -6  -5    0.40    0.40
   0   6  -5    0.80    0.30
   0   6   5    0.70    0.50
   0   6  -5    0.20    0.30
   0  -6   5    0.80    0.40
   0  -6  -5    0.50    0.40
   0  -6  -5    0.30    0.40
   1   6  -5  262.07    6.40
   1   6  -5  277.57    4.80
   1   6  -5  290.87    5.30
  -1  -6  -5  294.97    6.40
  -1   6   5  275.07    6.20
  -1   6   5  282.37    5.70
  -1  -6  -5  287.47    6.30
  -1   6   5  284.47    6.40
  -1  -6  -5  277.17    5.70
  -1   6   5  284.17    5.80
   1  -6   5  289.67    6.40
   1  -6  -5  284.67    5.70
  -1  -6   5  283.97    6.10
   1   6   5  284.07    5.70
   1   6   5  289.67    6.40
  -1   6  -5  291.67    5.40
   1  -6  -5  292.47    6.30
   1  -6  -5  283.97    6.30
  -1   6  -5  287.47    6.40
  -2  -6  -5  121.39    3.40
  -2   6   5  119.19    3.20
  -2   6   5  120.69    3.70
  -2  -6  -5  132.19    3.80
   2   6  -5  120.59    3.20
  -2  -6  -5  123.09    3.70
  -2   6   5  122.79    3.30
   2   6  -5  120.19    3.30
   2   6  -5  116.19    2.70
  -2   6   5  128.79    3.90
  -2   6  -5  124.89    3.10
   2  -6  -5  126.79    3.80
  -2  -6   5  122.39    3.80
   2  -6  -5  122.69    3.70
  -2   6  -5  120.09    2.60
   2   6   5  122.89    3.70
  -2   6  -5  119.19    3.70
   2   6   5  122.99    3.20
   2  -6  -5  118.79    3.10
   3   6  -5  361.66    7.40
  -3   6   5  378.26    7.40
  -3   6   5  367.76    7.90
  -3   6   5  366.26    7.70
  -3  -6  -5  365.76    7.70
  -3  -6  -5  357.86    7.40
   3   6  -5  369.96    7.00
  -3   6   5  367.86    7.30
   3   6  -5  370.26    6.80
  -3   6  -5  366.56    6.50
   3  -6  -5  372.16    7.20
  -3   6  -5  371.36    7.10
  -3   6  -5  368.36    8.00
  -3  -6   5  377.66    7.20
   3  -6  -5  369.46    7.80
   3   6   5  372.66    7.90
   3   6   5  379.06    7.20
   3  -6  -5  378.96    7.90
  -4  -6  -5   71.29    2.70
   4   6  -5   72.09    2.30
   4  -6   5   71.09    1.80
  -4   6   5   73.69    2.60
   4   6  -5   72.29    2.30
   4  -6   5   68.89    1.60
   4   6  -5   69.49    2.60
  -4   6   5   72.39    3.00
  -4   6   5   67.79    2.70
  -4  -6  -5   72.09    2.70
  -4   6  -5   71.69    2.00
   4   6   5   71.99    2.90
  -4   6  -5   69.59    3.00
   4  -6  -5   70.19    2.80
   4  -6  -5   70.99    2.50
  -4  -6   5   70.39    2.30
   4   6   5   74.79    2.50
   4  -6  -5   72.39    2.80
  -4   6  -5   73.49    2.60
  -5  -6  -5  147.49    4.40
  -5  -6  -5  152.38    4.50
  -5   6   5  163.08    4.40
  -5   6   5  152.28    4.70
  -5   6   5  161.88    4.60
   5   6  -5  159.88    3.80
   5  -6   5  154.88    3.20
   5   6  -5  155.48    4.00
   5   6  -5  160.48    4.50
   5   6  -5  158.78    4.10
   5  -6   5  160.88    3.60
   5   6   5  156.08    4.10
   5   6   5  157.48    4.70
  -5   6  -5  159.58    4.30
   5  -6  -5  159.68    4.60
  -5   6  -5  161.18    4.90
  -5   6  -5  158.48    3.60
  -5  -6   5  156.08    3.70
   5  -6  -5  157.48    4.20
   5  -6  -5  146.29    4.40
   6  -6   5  196.28    4.10
   6   6  -5  208.28    4.50
  -6  -6  -5  198.38    5.40
   6   6  -5  198.08    5.00
  -6   6   5  198.38    5.40
  -6   6   5  198.78    5.30
  -6  -6  -5  199.08    5.40
   6   6  -5  199.38    5.00
   6  -6   5  200.58    4.50
  -6   6   5  197.78    5.70
   6  -6  -5  206.78    5.60
  -6  -6   5  202.98    4.20
  -6  -6   5  209.48    4.50
  -6   6  -5  210.38    6.00
   6  -6  -5  192.88    5.30
   6   6   5  199.58    5.10
   6   6   5  192.48    5.50
   6  -6  -5  205.98    5.60
   6  -6  -5  201.18    5.00
  -6   6  -5  201.88    5.30
  -6   6  -5  195.78    4.50
   7   6  -5   31.50    1.90
   7  -6   5   27.60    1.60
  -7  -6  -5   31.20    2.10
  -7  -6  -5   27.60    1.90
  -7   6   5   29.20    2.20
  -7   6   5   28.80    2.00
   7  -6   5   31.70    1.50
   7  -6   5   29.70    1.30
   7   6  -5   32.90    2.00
   7   6  -5   27.80    1.80
  -7   6   5   30.90    2.00
  -7   6  -5   31.60    2.10
  -7   6  -5   29.10    1.50
   7  -6  -5   33.30    2.10
  -7   6  -5   27.90    2.20
   7  -6  -5   27.50    2.00
   7   6   5   30.40    2.00
   7  -6  -5   32.40    1.90
  -7  -6   5   31.10    1.50
   7  -6  -5   28.20    1.60
  -7  -6   5   31.30    1.40
  -8   6   5   32.70    2.10
  -8  -6  -5   31.10    2.00
  -8  -6  -5   32.10    2.30
   8   6  -5   33.30    2.10
   8  -6   5   33.90    1.70
  -8   6   5   33.00    2.10
   8  -6   5   37.10    1.90
  -8   6   5   35.60    2.50
   8  -6   5   33.40    1.50
  -8   6  -5   32.00    1.70
  -8  -6   5   35.50    1.70
  -8   6  -5   31.30    2.20
  -8  -6   5   31.10    1.50
  -8   6  -5   30.00    2.30
   8  -6  -5   30.60    2.00
   9  -6   5   59.49    2.60
  -9   6   5   60.99    3.10
  -9  -6  -5   60.89    3.10
   9  -6   5   62.19    2.50
  -9   6   5   58.69    2.90
  -9   6   5   60.99    3.30
   9  -6   5   56.29    2.10
  -9   6  -5   54.99    3.10
  -9  -6   5   55.79    2.00
  -9   6  -5   60.29    2.50
   9  -6  -5   59.99    2.80
  -9  -6   5   56.89    2.40
  -9   6  -5   55.69    3.30
 -10   6   5    9.50    1.60
  10  -6   5   10.30    1.10
 -10   6   5   12.00    1.90
 -10   6   5   11.00    1.80
 -10  -6  -5   10.70    1.70
  10  -6   5   11.70    1.40
 -10   6  -5   12.80    1.80
 -10  -6   5   12.70    1.30
 -10   6  -5   11.70    1.70
 -10   6  -5   14.00    1.30
  10  -6  -5   14.30    1.60
 -11  -6  -5   19.10    2.30
 -11   6   5   19.70    1.90
 -11   6   5   17.40    2.10
 -11   6   5   18.90    2.50
 -11  -6   5   19.40    1.60
 -11   6  -5   17.60    2.30
 -11   6  -5   24.30    2.30
 -11   6  -5   21.50    1.70
  11  -6  -5   22.30    2.00
   0  -7   5    0.70    0.40
   0   7   5    0.30    0.30
   0  -7  -5    0.20    0.40
   0   7   5    0.00    0.40
   0   7  -5    0.80    0.50
   0  -7  -5    0.70    0.50
   0   7  -5    0.00    0.30
   0  -7  -5    0.40    0.30
   0   7  -5    0.40    0.20
  -1   7   5  219.18    5.70
  -1   7   5  214.48    5.00
  -1  -7  -5  228.08    5.60
   1   7  -5  217.58    4.00
   1  -7   5  212.08    5.50
  -1   7   5  211.98    5.50
  -1   7   5  223.08    4.90
   1   7  -5  224.18    4.70
   1   7  -5  220.88    5.30
  -1  -7  -5  212.08    4.90
  -1  -7  -5  222.28    5.50
  -1  -7   5  215.68    5.30
   1   7   5  212.98    5.50
   1  -7  -5  213.98    4.80
   1  -7  -5  224.58    5.40
  -1   7  -5  222.58    4.70
  -1   7  -5  215.18    5.50
   1  -7  -5  215.28    5.50
   1   7   5  216.78    4.80
  -2  -7  -5  766.52   13.10
   2  -7   5  724.13   13.90
  -2   7   5  750.52   13.10
   2   7  -5  760.02   13.20
  -2   7   5  768.52   14.10
   2   7  -5  743.23   13.10
  -2  -7  -5  747.43   13.70
  -2   7   5  740.33   13.70
  -2   7   5  761.42   13.00
  -2  -7  -5  773.02   13.80
   2   7  -5  763.52   12.10
   2   7   5  751.22   13.90
   2  -7  -5  776.72   13.00
  -2   7  -5  763.32   12.30
  -2   7  -5  752.02   14.00
   2  -7  -5  746.93   14.00
  -2   7  -5  757.52   12.90
   2   7   5  774.92   13.10
  -2  -7   5  782.42   13.50
   2  -7  -5  775.22   13.80
  -3  -7  -5   92.89    3.10
   3   7  -5   96.59    3.00
   3   7  -5   96.69    2.60
  -3  -7  -5   97.59    3.40
  -3   7   5   91.49    3.00
   3   7  -5   92.09    3.10
  -3   7   5  103.29    3.10
  -3   7   5   95.79    3.40
  -3  -7  -5   95.79    3.40
  -3   7   5   97.69    3.60
   3   7   5   94.89    2.90
  -3  -7   5   94.59    3.00
  -3   7  -5   95.29    3.00
  -3   7  -5   94.39    2.40
  -3   7  -5   90.59    3.50
   3   7   5   96.19    3.50
   3  -7  -5   94.69    2.90
   3  -7  -5   94.19    3.30
   3  -7  -5   94.89    3.50
  -4   7   5   45.70    2.10
  -4   7   5   49.30    2.40
  -4  -7  -5   49.40    2.50
   4   7  -5   47.10    2.00
  -4   7   5   47.80    2.60
   4   7  -5   49.60    1.90
  -4  -7  -5   49.10    2.30
  -4  -7  -5   51.29    2.50
  -4   7   5   49.00    2.20
   4   7  -5   49.80    2.30
   4  -7  -5   53.99    2.50
  -4   7  -5   50.89    2.00
  -4   7  -5   48.00    2.20
   4  -7  -5   52.89    2.50
  -4   7  -5   50.29    2.60
   4  -7  -5   51.09    2.10
   4   7   5   54.09    2.20
   4   7   5   49.80    2.50
  -4  -7   5   45.60    2.00
  -5  -7  -5  127.69    4.10
   5   7  -5  135.99    3.60
  -5   7   5  130.69    4.50
  -5  -7  -5  135.69    5.30
   5   7  -5  129.69    3.60
   5   7  -5  129.39    4.10
  -5   7   5  128.79    4.00
  -5   7   5  126.39    4.20
   5  -7   5  128.79    2.70
   5  -7   5  132.29    3.10
   5  -7  -5  129.19    4.30
   5  -7  -5  135.89    4.40
   5   7   5  137.29    4.50
  -5  -7   5  138.49    3.70
  -5   7  -5  128.79    3.30
   5   7   5  130.89    3.80
   5  -7  -5  136.99    3.80
  -5   7  -5  132.19    4.60
  -5   7  -5  139.39    4.10
   6  -7   5  389.56    7.20
  -6   7   5  372.06    8.30
  -6  -7  -5  381.76    8.50
  -6   7   5  366.86    8.90
   6   7  -5  387.86    7.50
   6   7  -5  376.86    7.90
   6  -7   5  380.16    6.70
  -6  -7  -5  391.46    8.60
   6   7  -5  383.56    8.60
  -6   7   5  375.86    8.60
   6  -7  -5  371.06    8.60
   6   7   5  380.76    8.70
   6   7   5  373.16    8.60
  -6   7  -5  380.46    7.30
  -6  -7   5  379.76    7.40
  -6   7  -5  370.96    9.00
   6   7   5  374.16    7.90
   6  -7  -5  381.06    7.90
   6  -7  -5  374.16    8.70
  -6   7  -5  380.56    8.40
  -7  -7  -5  158.88    5.00
  -7  -7  -5  155.78    4.80
   7  -7   5  149.59    3.90
   7   7  -5  153.48    4.50
  -7   7   5  153.88    4.90
  -7   7   5  148.69    5.20
  -7   7  -5  149.29    4.80
  -7   7  -5  153.88    4.10
  -7  -7   5  153.88    3.90
   7  -7  -5  151.28    5.00
   7  -7  -5  157.58    4.50
  -7   7  -5  157.18    5.40
   8  -7   5   10.40    1.00
  -8   7   5   11.30    1.50
  -8   7   5   10.60    1.70
  -8  -7  -5   10.80    1.60
  -8   7   5   11.60    1.70
   8  -7   5   10.30    1.20
  -8   7  -5   11.70    1.20
  -8   7  -5   12.90    1.70
  -8  -7   5   11.40    1.00
  -8   7  -5   14.30    2.00
  -8  -7   5   11.60    1.70
  -8  -7   5   10.30    1.10
   8  -7  -5   10.70    1.30
   9  -7   5    4.70    0.80
  -9   7   5    4.60    1.10
  -9   7   5    4.00    0.90
  -9  -7  -5    2.80    0.90
  -9   7   5    4.80    1.30
   9  -7   5    3.50    0.80
  -9  -7   5    3.70    0.70
  -9   7  -5    3.60    1.00
  -9   7  -5    4.60    0.80
   9  -7  -5    2.80    0.80
  -9   7  -5    4.40    1.10
  -9  -7   5    5.00    0.90
  10  -7   5   78.79    2.80
 -10   7   5   86.29    3.80
 -10   7   5   90.99    4.10
 -10   7   5   86.99    4.30
 -10  -7  -5   85.39    4.00
  10  -7   5   82.39    3.00
  10  -7  -5   85.19    3.60
 -10   7  -5   83.99    4.20
 -10   7  -5   78.69    3.90
 -10   7  -5   80.79    3.20
 -10  -7   5   82.89    3.00
 -10  -7   5   84.39    2.70
  11  -7   5   24.50    2.10
 -11   7   5   23.50    2.90
 -11  -7  -5   25.40    2.30
 -11   7   5   24.80    2.20
 -11   7   5   24.80    2.30
 -11   7  -5   24.60    1.80
 -11   7  -5   25.30    4.20
 -11   7  -5   22.80    2.40
 -11  -7   5   23.40    1.70
 -11  -7   5   22.80    1.50
  11  -7  -5   23.40    2.00
   0   8  -5   74.19    3.60
   0  -8   5   70.79    2.90
   0   8   5   76.29    3.20
   0   8   5   67.39    2.50
   0  -8  -5   74.79    3.10
   0  -8  -5   72.19    2.50
   0   8  -5   70.19    1.70
   0   8  -5   73.69    2.90
   0  -8  -5   74.69    2.90
  -1   8   5  111.79    3.30
  -1  -8  -5  106.09    3.30
   1  -8   5  111.69    3.90
  -1   8   5  113.09    3.30
   1   8  -5  111.09    2.50
  -1   8   5  108.29    3.90
   1   8  -5  110.89    3.60
  -1   8   5  112.09    3.80
  -1  -8  -5  105.59    3.60
  -1  -8  -5  111.59    3.90
   1   8   5  109.59    3.90
  -1  -8   5  112.49    3.70
   1  -8  -5  110.99    3.70
  -1   8  -5  104.59    3.10
   1  -8  -5  108.79    3.10
  -1   8  -5  103.49    3.70
   1  -8  -5  113.19    3.90
   1   8   5  107.69    3.20
   2   8  -5   86.79    2.30
   2  -8   5   91.59    3.60
  -2   8   5   85.99    3.40
  -2   8   5   84.19    2.90
  -2   8   5   87.89    3.60
  -2  -8  -5   86.09    3.00
   2   8  -5   85.79    3.00
   2   8  -5   84.59    3.10
  -2  -8  -5   88.89    3.30
  -2   8   5   81.69    2.80
  -2   8  -5   85.69    2.40
   2  -8  -5   84.29    3.20
   2   8   5   90.89    3.50
  -2   8  -5   84.39    3.40
  -2   8  -5   91.59    2.90
  -2  -8   5   83.99    3.10
   2  -8  -5   84.09    2.70
   2   8   5   82.69    2.80
  -3  -8  -5  659.43   12.90
  -3   8   5  660.23   13.20
  -3   8   5  676.43   12.20
   3   8  -5  653.13   12.10
   3   8  -5  672.83   12.50
  -3  -8  -5  669.93   12.40
  -3   8   5  682.13   13.10
  -3   8   5  654.43   12.10
  -3  -8  -5  692.73   12.90
   3   8  -5  678.63   11.30
   3  -8  -5  659.13   12.70
   3   8   5  675.83   13.10
  -3   8  -5  655.83   12.10
   3   8   5  664.33   11.90
  -3  -8   5  667.43   12.30
   3  -8  -5  685.43   11.80
   3  -8  -5  650.73   13.00
  -3   8  -5  668.53   11.20
  -3   8  -5  667.43   13.20
  -4  -8  -5   45.10    2.40
   4   8  -5   45.80    2.30
  -4  -8  -5   45.80    2.40
   4   8  -5   43.00    2.10
  -4   8   5   46.70    2.20
   4   8  -5   41.10    1.80
  -4  -8  -5   47.40    2.90
  -4   8   5   45.50    2.60
  -4   8   5   46.30    2.30
  -4   8   5   44.40    2.50
  -4   8  -5   43.00    2.50
   4   8   5   41.00    2.00
  -4   8  -5   42.70    1.70
   4  -8  -5   46.50    2.40
  -4   8  -5   41.70    2.10
   4  -8  -5   45.70    2.00
   4   8   5   45.10    2.50
  -4  -8   5   44.10    2.10
   4  -8  -5   41.80    2.40
   5   8  -5  275.47    6.00
  -5  -8  -5  270.37    6.70
  -5   8   5  278.77    7.40
  -5   8   5  281.67    6.70
  -5   8   5  275.37    7.10
  -5  -8  -5  278.27    7.00
  -5  -8  -5  280.97    7.10
   5   8  -5  283.27    6.90
   5   8  -5  283.57    6.30
   5   8   5  281.37    6.40
  -5  -8   5  281.57    6.30
  -5   8  -5  285.67    7.50
   5  -8  -5  283.57    6.30
   5  -8  -5  278.37    7.30
  -5   8  -5  282.57    6.80
   5  -8  -5  277.17    7.00
   5   8   5  273.07    7.20
  -5   8  -5  284.67    5.90
  -6   8   5    3.80    1.10
   6   8  -5    4.90    0.90
  -6   8   5    3.70    1.00
  -6  -8  -5    4.60    1.30
  -6  -8  -5    4.90    1.10
   6  -8   5    4.70    0.70
   6  -8   5    3.70    0.50
  -6   8   5    2.40    1.20
   6   8  -5    3.00    0.70
  -6  -8   5    3.80    0.80
  -6   8  -5    2.70    0.60
   6  -8  -5    3.10    1.00
   6  -8  -5    2.70    0.70
   6   8   5    2.00    0.90
  -6   8  -5    4.50    1.20
  -6   8  -5    3.70    0.90
   7  -8   5    8.20    1.00
  -7   8   5    7.60    1.40
  -7   8   5    8.10    1.30
   7  -8   5    8.70    0.80
   7   8  -5    8.90    1.40
   7   8  -5    7.50    1.10
   7  -8  -5    6.40    1.10
  -7   8  -5    7.20    1.00
  -7   8  -5    8.80    1.80
  -7   8  -5    9.40    1.80
  -7  -8   5    8.00    1.00
  -8   8   5   51.69    2.90
  -8   8   5   59.49    3.20
   8  -8   5   56.09    2.00
  -8  -8  -5   58.19    3.10
  -8   8   5   58.89    3.30
   8  -8   5   55.29    2.30
  -8  -8   5   57.09    2.40
   8  -8  -5   60.39    2.80
  -8   8  -5   57.59    2.50
  -8   8  -5   57.79    3.20
  -8   8  -5   61.59    3.50
   9  -8   5    4.00    0.80
  -9  -8  -5    4.10    1.10
  -9   8   5    3.70    1.20
   9  -8   5    5.30    1.10
  -9   8   5    2.00    0.90
  -9   8   5    3.60    1.10
  -9   8  -5    3.10    1.10
  -9   8  -5    5.10    0.90
  -9  -8   5    2.70    0.70
   9  -8  -5    4.50    1.00
  -9   8  -5    3.20    1.10
  10  -8   5   12.20    1.20
 -10   8   5   14.80    1.90
 -10   8   5   11.80    1.70
 -10  -8  -5   14.60    1.90
 -10   8   5   13.70    2.30
 -10   8  -5   10.20    1.80
 -10  -8   5   12.50    1.30
 -10   8  -5   11.70    1.90
  10  -8  -5   12.30    1.60
   0   9   5  311.67    7.70
   0   9   5  312.17    6.70
   0  -9  -5  311.67    7.20
   0  -9  -5  310.07    6.60
   0  -9  -5  313.47    7.70
   0   9  -5  306.67    6.70
   0   9  -5  310.77    5.40
   0   9  -5  307.17    7.40
  -1   9   5    5.80    0.90
  -1  -9  -5    3.80    0.80
   1   9  -5    5.60    1.10
  -1   9   5    5.40    0.90
  -1  -9  -5    5.50    1.10
   1   9  -5    5.50    0.60
  -1   9   5    8.60    1.40
  -1  -9  -5    6.60    1.10
   1  -9   5    5.80    1.20
  -1   9  -5    6.90    1.30
   1   9   5    4.90    0.80
  -1   9  -5    7.80    1.20
   1  -9  -5    8.50    1.30
  -1  -9   5    9.10    1.40
   1  -9  -5    6.00    0.90
   1   9   5    7.10    1.30
   1  -9  -5    8.10    1.40
  -2  -9  -5  123.49    4.10
  -2  -9  -5  115.59    3.70
  -2   9   5  119.39    4.40
   2   9  -5  113.79    3.70
  -2   9   5  118.19    3.60
   2   9  -5  119.19    2.90
  -2  -9  -5  121.49    4.30
  -2   9   5  114.79    3.60
   2   9  -5  113.59    3.90
  -2   9   5  117.09    4.30
   2  -9   5  121.19    4.40
  -2  -9   5  116.89    3.90
   2  -9  -5  111.49    4.20
   2   9   5  112.29    4.20
  -2   9  -5  120.99    4.30
   2   9   5  115.69    4.00
   2  -9  -5  117.49    3.40
  -2   9  -5  121.99    3.70
  -2   9  -5  109.79    3.00
  -3   9   5   92.19    3.90
   3   9  -5  104.29    4.50
  -3   9   5   96.99    3.30
  -3  -9  -5   83.49    3.60
  -3  -9  -5   89.39    3.30
  -3   9   5   90.49    3.20
   3   9  -5   95.99    3.40
   3   9  -5   93.69    2.60
  -3   9   5   84.89    3.70
  -3  -9  -5   94.09    3.60
   3  -9  -5   90.49    3.00
   3  -9  -5   94.29    4.50
  -3   9  -5   98.89    3.40
  -3  -9   5   89.79    3.30
   3  -9  -5   92.19    3.50
  -3   9  -5   79.99    3.60
  -3   9  -5   89.89    2.70
   3   9   5   91.89    3.10
   3   9   5   94.39    3.80
   4   9  -5    0.70    0.40
  -4   9   5    0.30    0.70
  -4   9   5   -0.50    0.40
  -4  -9  -5    0.80    0.60
  -4  -9  -5    0.20    0.60
   4   9  -5    1.10    0.60
  -4  -9  -5    2.40    0.80
   4   9  -5    0.90    0.60
  -4   9  -5    0.00    0.40
  -4   9  -5    0.60    0.50
   4  -9  -5    0.20    0.40
   4   9   5    0.20    0.60
  -4  -9   5   -0.10    0.50
   4  -9  -5    0.30    0.60
   4   9   5    0.00    0.40
   5   9  -5   18.80    1.50
  -5   9   5   18.40    1.60
   5   9  -5   15.90    1.30
  -5   9   5   17.50    1.80
  -5   9   5   18.70    2.00
  -5  -9  -5   21.10    1.70
  -5  -9  -5   21.70    1.90
   5  -9  -5   18.80    1.40
  -5   9  -5   20.30    1.30
  -5  -9   5   18.30    1.40
  -5   9  -5   20.20    1.80
  -5   9  -5   20.10    2.00
  -6   9   5  180.98    5.40
   6   9  -5  180.58    4.90
  -6  -9  -5  181.58    5.40
  -6   9   5  179.58    5.70
   6   9  -5  172.88    4.70
  -6   9   5  177.58    6.00
  -6   9  -5  181.28    6.00
  -6   9  -5  181.78    5.50
   6  -9  -5  178.88    4.80
  -6  -9   5  174.98    4.80
   6   9   5  176.18    5.80
  -6   9  -5  179.18    4.60
   7   9  -5   84.09    3.10
  -7   9   5   78.99    4.00
  -7   9   5   90.89    4.00
   7  -9   5   86.89    2.70
   7  -9   5   86.39    2.30
  -7  -9  -5   83.49    3.70
  -7   9   5   88.59    3.70
  -7   9  -5   85.49    3.00
  -7   9  -5   83.49    4.10
  -7   9  -5   87.19    3.80
  -7  -9   5   84.69    3.10
  -8  -9  -5    8.40    1.50
   8  -9   5    8.10    1.10
   8  -9   5    8.70    0.90
  -8   9   5    8.40    1.40
  -8   9   5    8.50    1.40
  -8   9   5   11.30    1.90
   8  -9  -5    8.80    1.30
  -8  -9   5    9.20    1.20
  -8   9  -5   11.30    2.10
  -8   9  -5    8.90    1.70
  -8   9  -5    7.50    1.10
  -9   9   5    5.00    1.10
  -9  -9  -5    6.20    1.30
  -9   9   5    7.80    1.70
   9  -9   5    4.60    0.80
  -9   9   5    3.20    1.20
   9  -9   5    4.10    1.00
  -9  -9   5    5.20    1.00
  -9   9  -5    6.30    1.00
  -9   9  -5    3.50    1.20
   9  -9  -5    4.70    1.00
  -9   9  -5    6.50    1.60
 -10  -9  -5   58.59    3.40
  10  -9   5   56.19    2.20
 -10   9   5   59.89    3.70
 -10   9   5   54.49    3.30
 -10   9  -5   52.89    4.20
 -10   9  -5   57.79    3.80
  10  -9  -5   58.39    2.90
 -10   9  -5   57.59    2.70
   0 -10   5    2.40    0.90
   0 -10  -5    3.30    0.80
   0  10  -5    4.90    1.00
   0  10   5    2.50    0.70
   0  10  -5    2.30    0.80
   0  10  -5    2.80    0.40
   0  10   5    3.50    1.00
   0 -10  -5    3.10    0.80
  -1  10   5   79.39    2.90
  -1 -10  -5   77.09    3.20
   1  10  -5   78.09    3.40
   1  10  -5   82.69    2.20
  -1 -10  -5   84.49    3.10
  -1  10   5   88.19    3.10
  -1  10   5   79.69    3.60
   1 -10  -5   84.29    3.40
  -1 -10   5   85.89    3.50
   1  10   5   87.09    3.10
  -1  10  -5   83.29    3.60
   1  10   5   85.89    3.80
  -1  10  -5   83.09    3.20
   1 -10  -5   83.49    2.90
  -2  10   5    4.50    1.30
   2  10  -5    4.20    0.60
  -2  10   5    3.10    0.80
  -2 -10  -5    2.90    0.80
   2  10  -5    2.70    0.70
   2  10  -5    3.00    0.80
  -2 -10  -5    3.40    0.90
  -2  10   5    3.60    1.00
  -2  10   5    3.50    0.80
  -2  10  -5    4.30    1.30
   2  10   5    4.30    0.80
  -2 -10   5    3.00    0.90
  -2  10  -5    3.50    0.70
   2 -10  -5    4.00    0.90
   2 -10  -5    3.50    0.70
  -2  10  -5    3.60    0.90
   2  10   5    3.40    1.10
  -3 -10  -5    7.10    1.20
  -3  10   5    4.90    0.90
   3  10  -5    4.60    1.00
   3  10  -5    5.40    0.70
  -3  10   5    6.30    1.00
  -3 -10  -5    4.10    1.00
  -3  10   5    7.30    1.40
   3  10  -5    4.40    1.00
  -3  10   5    3.70    1.20
   3 -10  -5    4.70    0.80
  -3  10  -5    4.20    1.10
   3 -10  -5    5.00    1.00
   3  10   5    4.80    1.00
  -3  10  -5    6.10    1.30
  -3  10  -5    5.50    0.80
  -3 -10   5    3.60    0.90
  -4  10   5    4.90    1.00
  -4 -10  -5    3.80    0.90
  -4 -10  -5    4.00    0.90
   4  10  -5    3.40    0.70
  -4  10   5    1.70    0.80
  -4  10   5    2.10    0.70
   4  10  -5    5.20    1.00
  -4 -10  -5    4.60    1.20
  -4  10  -5    3.60    0.70
  -4  10  -5    3.30    1.00
  -4 -10   5    3.40    0.90
   4  10   5    4.50    1.10
  -4  10  -5    5.60    1.10
   4 -10  -5    2.90    0.70
   5  10  -5   23.50    1.80
  -5 -10  -5   27.00    2.00
   5  10  -5   24.10    1.50
  -5  10   5   28.10    2.40
  -5  10   5   28.40    2.00
  -5  10   5   19.50    1.90
   5 -10  -5   26.40    1.60
  -5  10  -5   25.50    2.30
  -5  10  -5   26.20    1.50
  -5 -10   5   26.10    1.90
   5  10   5   25.40    2.30
  -5  10  -5   22.60    1.90
  -6  10   5    4.50    1.20
  -6 -10  -5    2.50    0.90
  -6  10   5    2.30    0.80
   6  10  -5    2.50    0.80
  -6  10   5    2.60    1.00
   6 -10  -5    3.10    0.80
   6  10   5    1.90    1.00
  -6  10  -5    3.20    1.20
  -6  10  -5    2.70    0.70
  -6 -10   5    3.10    0.80
  -6  10  -5    2.30    0.90
  -7 -10  -5   37.40    2.40
   7  10  -5   36.40    2.20
  -7  10   5   38.00    2.70
  -7  10   5   37.90    2.90
  -7  10   5   34.50    2.40
  -7  10  -5   34.40    1.90
   7  10   5   38.60    2.80
  -7  10  -5   34.80    2.80
   7 -10  -5   35.70    2.10
  -7 -10   5   33.70    2.10
  -7  10  -5   38.70    2.70
  -8  10   5    6.40    1.30
  -8  10   5    6.60    1.50
   8 -10   5    7.30    0.80
  -8 -10  -5    3.40    1.10
   8 -10  -5    6.40    1.10
  -8  10  -5    6.60    1.50
  -8  10  -5    4.00    1.30
  -8  10  -5    4.70    0.90
  -8 -10   5    5.20    1.00
  -9 -10  -5   38.90    2.70
  -9  10   5   41.80    3.70
  -9  10   5   37.30    3.20
   9 -10   5   36.60    1.60
  -9  10   5   36.90    2.80
  -9  10  -5   38.90    2.20
   9 -10  -5   35.40    2.30
  -9  10  -5   37.30    3.00
  -9 -10   5   38.30    3.40
  -9  10  -5   36.40    2.90
   0  11   5   25.70    1.70
   0  11   5   27.20    2.30
   0  11  -5   27.80    2.00
   0 -11  -5   21.20    1.90
   0  11  -5   26.70    2.10
   0 -11  -5   27.90    1.80
   0  11  -5   27.90    1.20
   1  11  -5  134.19    4.80
  -1  11   5  151.38    4.40
  -1  11   5  144.89    5.20
  -1 -11  -5  135.99    4.50
  -1  11   5  132.99    4.20
  -1 -11  -5  143.29    4.30
   1  11  -5  139.29    3.30
  -1  11  -5  138.09    4.50
   1  11   5  143.59    5.20
  -1  11  -5  144.49    5.10
   1 -11  -5  138.99    4.90
   1 -11  -5  135.79    4.10
   2  11  -5   23.60    1.20
  -2  11   5   23.00    1.60
  -2 -11  -5   24.40    2.20
  -2  11   5   24.90    1.80
  -2  11   5   26.00    2.20
  -2  11  -5   25.00    1.50
   2  11   5   26.40    2.20
  -2  11  -5   22.50    1.90
  -2  11  -5   26.50    2.30
   2 -11  -5   22.70    1.50
  -3  11   5    6.90    1.10
  -3 -11  -5    7.00    1.30
  -3  11   5    7.40    1.60
  -3  11   5    7.80    1.50
   3  11  -5    8.40    0.90
  -3  11   5    7.10    1.20
   3  11  -5    6.60    1.20
   3 -11  -5    7.10    1.00
   3  11   5    7.80    1.50
  -3  11  -5    7.60    1.40
  -3  11  -5    7.60    1.00
  -3  11  -5    6.90    1.40
  -4  11   5   57.39    3.30
  -4  11   5   57.49    3.50
  -4  11   5   51.89    2.70
  -4 -11  -5   49.60    2.80
   4  11  -5   55.99    2.80
   4  11  -5   51.49    2.10
  -4  11  -5   55.09    2.30
   4  11   5   52.69    3.20
   4 -11  -5   53.19    2.30
  -4  11  -5   55.69    4.30
  -4  11  -5   52.29    3.20
   5  11  -5   50.89    2.70
   5  11  -5   50.89    2.20
  -5  11   5   51.29    2.70
  -5  11   5   50.49    3.30
  -5 -11  -5   50.39    2.70
  -5  11   5   50.29    3.30
  -5  11  -5   50.99    2.30
  -5  11  -5   52.09    2.90
   5 -11  -5   50.79    3.40
  -5  11  -5   46.20    3.10
   5  11   5   49.10    3.10
  -6  11   5    2.80    1.10
   6  11  -5    2.40    0.90
  -6 -11  -5    2.90    0.90
  -6  11   5    1.20    0.60
  -6  11   5    2.30    1.20
  -6  11  -5    3.90    1.10
   6 -11  -5    2.10    0.60
  -6  11  -5    3.10    0.80
  -6  11  -5    1.40    1.10
   6  11   5    2.80    1.00
  -7  11   5   11.00    2.10
   7  11  -5   16.40    1.60
  -7  11   5   24.40    4.30
  -7  11   5   19.50    1.90
  -7 -11  -5   16.50    1.80
   7  11   5   15.40    2.00
  -7  11  -5   16.00    1.50
  -7  11  -5   16.40    2.20
  -7  11  -5   16.60    2.90
   7 -11  -5   18.50    1.60
   8  11  -5    2.50    0.90
  -8 -11  -5    3.10    1.00
  -8  11   5    2.60    1.30
  -8  11  -5    2.50    1.30
  -8  11  -5    3.30    1.20
   8 -11  -5    3.80    1.00
  -8  11  -5    3.20    0.90
   0  12   5  371.06    8.40
   0  12  -5  353.16    6.60
   0  12   5  386.26    9.80
   0 -12  -5  383.66    8.30
   0  12  -5  372.66    9.40
  -1  12   5    0.10    0.70
  -1 -12  -5    0.20    0.60
   1  12  -5    0.00    0.70
   1  12  -5    0.30    0.40
  -1  12   5    0.30    0.50
  -1  12  -5    0.80    0.60
   1 -12  -5    0.60    0.70
   1  12   5   -0.10    0.80
  -1  12  -5    0.30    0.80
  -1  12  -5    0.90    0.90
   2  12  -5   13.00    1.00
  -2 -12  -5   16.00    1.60
  -2  12   5   13.30    2.10
   2  12  -5   13.70    1.80
  -2  12   5   12.50    1.50
   2  12   5   12.30    1.70
  -2  12  -5   11.60    1.80
   2 -12  -5   14.70    1.60
  -2  12  -5   12.10    1.70
  -2  12  -5   13.70    1.20
   3  12  -5   34.50    1.70
  -3  12   5   38.90    2.30
  -3  12   5   41.90    3.00
  -3 -12  -5   36.20    2.30
  -3 -12  -5   36.90    2.30
  -3  12   5   42.70    3.00
   3  12  -5   40.30    2.60
  -3  12  -5   41.00    2.60
  -3  12  -5   40.90    2.90
   3 -12  -5   36.60    2.00
   3  12   5   39.90    2.80
  -3  12  -5   37.50    2.00
  -4  12   5    3.90    1.30
   4  12  -5    3.90    1.10
   4  12  -5    3.40    0.80
  -4  12   5    5.00    1.20
  -4 -12  -5    5.10    1.10
  -4  12   5    3.70    1.30
   4 -12  -5    4.90    0.90
  -4  12  -5    2.90    1.00
  -4  12  -5    4.00    1.20
   4  12   5    4.90    1.20
  -4  12  -5    2.10    0.60
  -5  12   5   35.50    2.90
   5  12  -5   41.90    2.50
  -5  12   5   41.90    2.60
  -5  12   5   40.90    3.10
  -5 -12  -5   41.20    2.50
  -5  12  -5   37.20    2.70
  -5  12  -5   40.50    3.00
   5 -12  -5   41.30    2.20
   5  12   5   43.20    3.00
  -6  12   5    6.50    1.50
   6  12  -5   10.10    1.60
  -6  12   5    7.00    2.10
  -6 -12  -5    5.00    1.20
  -6  12   5   11.40    1.70
  -6  12  -5    8.20    1.20
  -6  12  -5   11.80    1.90
   6  12   5   10.00    1.80
  -6  12  -5    9.60    1.90
   6 -12  -5    9.20    1.30
   0  13   5  189.08    6.60
   0  13  -5  173.98    6.20
   0  13   5  180.78    5.40
   0 -13  -5  169.08    5.10
  -1  13   5   52.69    2.70
   1  13  -5   49.80    3.10
  -1  13   5   45.20    3.20
  -1 -13  -5   55.09    2.80
   1  13  -5   44.30    1.80
   1  13   5   47.00    3.20
   1 -13  -5   47.40    2.50
  -1  13  -5   52.29    3.30
  -1  13  -5   51.59    2.40
  -1  13  -5   49.50    3.00
  -2 -13  -5   24.80    2.00
  -2  13   5   30.20    3.30
   2  13  -5   23.80    2.20
   2  13  -5   23.00    1.30
  -2  13   5   23.50    1.90
  -2  13  -5   25.00    1.70
  -2  13  -5   24.70    2.10
   2  13   5   23.80    2.50
   2 -13  -5   24.10    1.80
  -2  13  -5   21.80    2.30
   3  13  -5   30.60    2.50
  -3  13   5   35.80    2.40
  -3 -13  -5   30.40    2.30
  -3  13   5   35.40    3.00
   3  13  -5   33.70    1.70
  -3 -13  -5   31.90    2.20
  -3  13  -5   30.10    2.40
   3 -13  -5   30.20    2.00
  -3  13  -5   32.60    3.50
   3  13   5   29.60    2.80
  -3  13  -5   31.50    1.90
  -4 -13  -5    8.80    1.50
  -4  13   5   10.40    2.00
   4  13  -5    7.80    1.10
  -4  13   5    9.40    1.70
   4  13  -5    9.50    1.60
   4 -13  -5    9.70    1.30
  -4  13  -5    6.40    1.10
  -4  13  -5    8.40    1.60
  -4  13  -5    8.60    1.60
   4  13   5    5.80    1.90
   0   0   6  612.64    9.70
   0   0   6  609.64    9.40
   0   0  -6  609.64    9.80
   0   0  -6  623.34    9.30
   0   0  -6  605.64    9.60
   1   0  -6 1581.34   23.60
   1   0  -6 1598.24   23.70
   2   0  -6 1157.58   17.80
   2   0  -6 1166.88   18.00
   2   0  -6 1155.48   17.90
  -2   0   6 1165.28   17.60
   2   0   6 1167.48   17.60
   2   0  -6 1198.78   17.30
  -2   0   6 1157.58   18.00
  -2   0  -6 1162.28   17.70
   3   0  -6  545.95    9.30
   3   0  -6  542.05    9.20
  -3   0   6  535.05    9.10
   3   0   6  569.34    9.00
  -3   0  -6  553.54    9.10
  -3   0   6  551.84    9.40
   3   0   6  556.44    8.80
   4   0   6  231.38    4.60
  -4   0  -6  230.08    4.90
   4   0  -6  232.08    5.30
   4   0  -6  231.48    4.90
  -4   0   6  242.28    5.60
  -4   0   6  225.58    4.70
   4   0   6  237.68    4.40
  -5   0   6   19.50    1.20
  -5   0  -6   19.90    1.30
  -5   0   6   19.60    1.30
   5   0  -6   19.60    1.20
   5   0  -6   22.50    1.30
   5   0   6   19.60    1.10
   5   0   6   21.50    1.10
   6   0  -6    5.10    0.80
  -6   0   6    5.30    0.40
   6   0   6    5.10    0.70
   6   0   6    5.50    0.70
  -6   0  -6    6.40    1.00
  -6   0   6    4.30    0.70
  -6   0   6    6.00    0.90
   7   0   6  291.57    6.20
   7   0  -6  294.37    6.50
  -7   0   6  285.07    6.50
  -7   0   6  287.27    6.70
   7   0  -6  286.17    6.60
   7   0   6  296.17    6.10
  -7   0   6  288.37    5.20
  -7   0  -6  286.87    6.70
   8   0  -6  473.95    9.60
  -8   0   6  480.55   10.00
   8   0   6  481.45    9.30
  -8   0   6  478.75    9.70
  -8   0  -6  470.35   10.00
  -8   0   6  474.25    8.10
   8   0   6  476.45    9.10
  -9   0  -6  164.48    5.20
   9   0   6  170.08    4.60
   9   0  -6  167.68    5.50
   9   0   6  168.28    4.70
  -9   0   6  171.48    3.70
  -9   0   6  161.98    4.90
  10   0   6  132.39    4.10
 -10   0  -6  133.19    4.90
 -10   0   6  127.79    4.50
 -10   0   6  127.79    4.60
 -10   0   6  127.39    3.20
 -11   0   6  101.09    2.90
 -11   0  -6  107.49    4.50
 -11   0   6   99.99    4.10
 -11   0   6  106.39    4.40
 -12   0   6    7.60    1.40
 -12   0   6    2.80    1.00
 -12   0   6    5.80    0.80
 -12   0  -6    5.10    1.30
 -12   0   6    5.00    0.80
 -13   0   6   23.00    2.20
 -13   0  -6   26.80    2.60
 -13   0   6   23.90    1.40
 -13   0   6   24.50    2.40
   0   1   6  192.78    3.90
   0   1   6  193.08    3.50
   0   1  -6  196.28    3.40
   0   1   6  198.78    3.80
   0  -1   6  193.98    3.30
   0  -1  -6  201.08    3.90
   0  -1   6  195.88    3.50
   0  -1  -6  194.18    3.70
   0   1  -6  200.38    3.20
   1  -1  -6 1979.30   29.70
  -2   1   6  609.14   10.20
   2   1  -6  618.14   10.00
  -2   1   6  600.54    9.60
   2   1  -6  608.84    9.60
  -2   1   6  613.34   10.00
  -2  -1  -6  612.44    9.90
  -2  -1  -6  622.74   10.50
   2   1  -6  606.64    9.90
   2  -1   6  611.74    9.50
  -2   1   6  632.44   10.10
   2  -1  -6  622.24   10.20
   2  -1  -6  621.34   10.00
  -2   1  -6  622.24    9.70
   2   1   6  609.34    9.90
   2  -1  -6  632.14    9.70
  -2  -1   6  607.74   10.00
   2  -1  -6  616.34   10.20
  -3  -1  -6  607.94   10.20
  -3   1   6  611.94   10.30
   3   1  -6  606.64   10.20
  -3   1   6  613.44    9.60
   3   1  -6  609.14   10.00
  -3   1   6  623.04   10.30
   3  -1   6  601.74    9.40
   3  -1   6  613.54    9.70
  -3  -1   6  630.34    9.70
   3   1   6  596.84   10.00
   3  -1  -6  621.14    9.60
  -3  -1   6  604.54   10.30
   3  -1  -6  609.74   10.40
   3  -1  -6  622.74   10.20
  -3   1  -6  606.74   10.00
   3  -1  -6  596.74   10.30
  -4   1   6   55.59    2.00
  -4   1   6   53.99    1.50
   4  -1   6   55.29    1.70
  -4  -1  -6   53.89    2.00
   4  -1   6   59.49    1.50
   4   1  -6   54.49    2.20
  -4   1   6   56.09    2.00
   4   1  -6   57.39    1.90
   4   1   6   51.39    1.70
  -4  -1   6   50.99    1.60
   4   1   6   51.09    1.70
  -4  -1   6   51.59    2.20
   4  -1  -6   52.39    2.00
   4  -1  -6   51.99    1.80
  -4   1  -6   50.79    1.80
   4  -1  -6   49.20    1.40
  -5  -1  -6   65.89    2.40
   5   1  -6   64.59    2.20
   5  -1   6   67.69    2.00
  -5   1   6   62.89    2.70
   5  -1   6   65.79    1.90
   5   1  -6   60.29    2.20
  -5   1   6   62.39    1.70
  -5   1  -6   66.69    2.30
  -5   1  -6   65.19    1.90
   5  -1  -6   62.09    2.30
   5   1   6   61.69    2.00
   5   1   6   64.59    2.10
  -5  -1   6   62.99    2.10
   5  -1  -6   62.99    2.30
  -5  -1   6   58.99    2.30
  -6   1   6    6.50    0.90
   6  -1   6    8.10    0.70
   6   1  -6    8.90    1.00
   6  -1   6    8.30    0.80
  -6   1   6    8.60    1.10
  -6   1   6    7.70    0.60
  -6  -1  -6   10.20    1.20
   6   1  -6    6.40    0.90
  -6  -1   6    8.80    0.90
  -6  -1   6    8.80    1.20
   6   1   6    7.50    0.90
   6   1   6    7.80    0.80
   6  -1  -6    7.00    1.00
  -6   1  -6    8.90    0.80
   6  -1  -6    7.40    1.00
  -6   1  -6    5.40    0.90
  -7   1   6   24.20    1.60
   7  -1   6   26.60    1.40
   7   1  -6   24.80    1.50
   7  -1   6   27.40    1.50
  -7  -1  -6   24.60    1.70
  -7   1   6   25.30    1.70
   7   1  -6   25.00    1.60
  -7   1   6   24.70    1.20
  -7   1  -6   27.20    1.40
  -7  -1   6   28.30    1.60
   7   1   6   26.40    1.60
  -7  -1   6   25.30    1.70
  -7   1  -6   26.60    1.70
   7  -1  -6   25.90    1.60
   7   1   6   27.10    1.50
   7  -1  -6   23.90    1.70
  -8  -1  -6   28.10    2.00
   8   1  -6   28.70    2.10
   8  -1   6   27.80    1.70
  -8   1   6   29.50    1.90
  -8   1   6   27.40    1.30
   8   1  -6   27.30    1.70
  -8   1   6   26.20    1.80
   8  -1   6   27.60    1.50
  -8   1  -6   26.20    1.90
   8   1   6   28.80    1.70
  -8  -1   6   25.00    1.70
   8  -1  -6   28.40    1.70
  -8   1  -6   26.80    1.50
   8  -1  -6   27.70    1.90
   8   1   6   27.50    1.60
  -8  -1   6   26.90    1.90
  -9   1   6  155.28    4.90
  -9   1   6  158.88    3.70
  -9   1   6  153.38    5.00
   9  -1   6  146.69    4.30
   9  -1   6  148.69    4.10
   9   1  -6  149.79    4.80
  -9  -1  -6  145.89    4.90
  -9   1  -6  146.79    4.20
  -9  -1   6  153.58    5.70
  -9  -1   6  148.59    4.60
  -9   1  -6  157.88    5.00
   9   1   6  145.89    4.40
   9   1   6  150.28    4.40
 -10   1   6   36.60    2.60
 -10  -1  -6   41.80    2.70
  10  -1   6   39.50    2.40
 -10   1   6   36.90    2.50
 -10   1   6   45.60    2.70
 -10   1  -6   39.20    2.20
 -10  -1   6   39.50    2.40
 -10  -1   6   41.60    1.50
 -10  -1   6   41.10    2.60
  10   1   6   35.30    2.10
 -10   1  -6   41.70    2.70
 -11   1   6   33.70    2.50
 -11  -1  -6   36.60    2.60
 -11   1   6   34.20    1.70
 -11   1   6   34.80    2.50
 -11  -1   6   37.00    1.50
 -11   1  -6   31.70    2.50
 -11  -1   6   37.90    1.50
 -11  -1   6   35.30    2.30
 -11  -1   6   34.70    2.50
 -12   1   6   46.10    2.00
 -12   1   6   37.30    2.70
 -12   1   6   40.00    2.70
 -12  -1  -6   40.20    2.90
 -12  -1   6   42.50    2.70
 -12  -1   6   40.90    2.80
 -12   1  -6   44.20    3.00
 -13  -1  -6   26.50    2.60
 -13   1   6   23.50    2.30
 -13   1   6   28.10    1.60
 -13   1   6   22.90    2.40
 -13  -1   6   19.30    2.10
 -13  -1   6   20.20    2.10
 -13   1  -6   22.50    2.40
 -13   1  -6   26.70    2.50
   0   2  -6  187.18    3.10
   0   2   6  176.18    3.80
   0  -2  -6  176.78    3.60
   0   2   6  176.08    3.60
   0   2   6  180.38    3.40
   0  -2   6  175.48    3.00
   0  -2  -6  180.28    3.80
   0   2  -6  180.68    3.00
   1   2  -6  339.17    5.70
   1   2  -6  354.36    5.80
  -1  -2  -6  336.67    6.00
  -1   2   6  339.67    5.90
  -1   2   6  336.47    6.10
  -1   2   6  329.67    6.10
   1   2  -6  337.67    5.70
   1  -2   6  357.66    5.40
  -1  -2  -6  341.07    6.30
  -1   2  -6  356.46    5.40
   1   2   6  349.57    6.50
   1   2   6  340.37    6.00
   1  -2  -6  340.87    6.40
   1  -2  -6  344.37    6.10
   1  -2  -6  335.67    6.10
  -1  -2   6  343.07    5.80
  -2   2   6   25.90    1.30
  -2   2   6   23.40    1.10
  -2   2   6   23.70    1.10
  -2   2   6   23.70    1.20
   2   2  -6   23.00    1.00
  -2  -2  -6   23.80    1.30
   2  -2   6   23.90    0.70
   2   2  -6   23.00    0.70
  -2  -2  -6   24.30    1.10
   2   2  -6   22.70    0.80
   2  -2  -6   24.90    1.20
   2   2   6   23.80    1.10
   2  -2  -6   24.70    1.00
  -2  -2   6   23.80    1.00
   2  -2  -6   23.60    1.30
   2  -2  -6   23.20    1.00
   3  -2   6  199.38    3.60
   3   2  -6  195.88    3.90
  -3  -2  -6  203.68    4.30
  -3   2   6  211.48    4.40
   3  -2   6  202.38    3.30
   3   2  -6  200.48    4.20
  -3  -2  -6  203.58    4.70
  -3   2   6  195.38    4.40
  -3   2   6  200.28    4.00
   3  -2  -6  196.18    4.00
   3  -2  -6  200.38    4.10
  -3   2  -6  202.08    4.00
   3  -2  -6  195.58    4.40
  -3   2  -6  201.28    3.30
   3  -2  -6  197.58    4.30
  -3  -2   6  198.78    4.20
   3   2   6  201.68    4.10
   4   2  -6  126.09    3.10
   4  -2   6  130.89    2.80
  -4   2   6  127.29    2.90
   4  -2   6  128.49    2.50
  -4  -2  -6  121.59    3.50
  -4   2   6  128.39    3.50
   4   2  -6  130.59    3.80
  -4   2   6  133.59    3.40
  -4  -2  -6  125.79    3.80
   4  -2  -6  130.79    3.40
   4   2   6  131.49    3.20
   4   2   6  123.79    3.10
   4  -2  -6  133.09    3.00
   4  -2  -6  129.59    3.50
  -4  -2   6  128.19    2.70
  -4   2  -6  128.19    2.60
  -4   2  -6  131.39    3.20
  -4  -2   6  129.79    3.80
   4  -2  -6  130.69    3.20
   5   2  -6   43.20    2.60
   5   2  -6   39.00    1.80
  -5  -2  -6   40.10    1.90
  -5   2   6   40.60    1.50
   5  -2   6   40.10    1.30
  -5   2   6   38.60    1.90
  -5  -2  -6   36.80    1.90
  -5   2   6   38.70    1.80
   5  -2   6   39.30    1.50
  -5   2  -6   38.80    1.30
  -5   2  -6   39.00    1.70
   5   2   6   41.00    1.70
  -5  -2   6   37.20    1.50
   5  -2  -6   40.10    1.90
   5  -2  -6   38.90    1.70
  -5  -2   6   40.80    1.80
   5   2   6   39.70    1.70
   5  -2  -6   42.30    1.90
   5  -2  -6   39.40    1.50
  -6   2   6   65.99    2.00
  -6  -2  -6   63.99    2.60
   6   2  -6   60.89    2.40
  -6  -2  -6   61.09    2.60
  -6   2   6   66.49    2.60
   6  -2   6   62.09    2.10
   6   2  -6   67.19    2.50
  -6   2   6   60.59    2.50
   6  -2   6   62.59    1.90
  -6   2  -6   68.29    2.60
  -6  -2   6   64.99    2.20
   6  -2  -6   63.59    2.60
  -6  -2   6   63.39    2.50
   6  -2  -6   63.59    2.30
   6   2   6   62.59    2.30
  -6   2  -6   64.89    2.00
   6  -2  -6   64.59    2.50
   6   2   6   62.59    2.30
  -7  -2  -6  850.41   15.20
  -7  -2  -6  830.92   15.10
  -7   2   6  818.72   15.00
   7  -2   6  852.11   13.80
   7   2  -6  848.22   14.90
  -7   2   6  833.22   15.10
   7   2  -6  824.42   14.80
  -7   2   6  850.61   13.90
   7  -2   6  842.82   14.20
  -7  -2   6  826.22   14.20
  -7  -2   6  834.52   14.90
  -7   2  -6  846.32   13.90
   7  -2  -6  809.32   14.40
   7  -2  -6  827.72   14.90
   7  -2  -6  851.71   15.10
  -7   2  -6  816.82   14.90
   7   2   6  830.22   14.40
   7   2   6  835.32   14.50
   8  -2   6  244.08    5.60
   8   2  -6  236.88    6.10
  -8  -2  -6  241.88    6.20
  -8   2   6  244.98    6.30
   8  -2   6  248.98    5.30
  -8  -2  -6  241.88    6.40
  -8   2   6  250.37    5.30
  -8   2   6  240.38    6.30
   8   2  -6  238.68    6.20
  -8  -2   6  247.68    5.80
  -8  -2   6  248.08    6.30
   8   2   6  246.28    5.90
  -8   2  -6  236.48    5.40
   8  -2  -6  240.68    6.20
   8   2   6  242.48    5.80
   8  -2  -6  238.38    5.80
   8  -2  -6  243.18    6.30
  -8   2  -6  234.78    6.20
   9   2  -6   14.00    1.70
  -9  -2  -6   12.20    1.60
  -9   2   6   11.80    1.10
   9  -2   6   11.30    1.10
  -9   2   6   12.60    1.60
   9  -2   6   12.30    1.20
  -9  -2  -6   12.90    2.00
  -9  -2   6   10.70    1.50
  -9  -2   6   15.70    2.20
  -9   2  -6   11.10    1.20
  -9   2  -6   11.20    1.60
   9   2   6   12.20    1.40
  10  -2   6   30.90    1.90
 -10  -2  -6   32.90    2.40
  10  -2   6   32.30    1.80
 -10   2   6   34.40    2.40
 -10   2   6   32.90    1.70
 -10   2   6   31.10    2.30
[truncated: 540,980 more chars]
